# Supplementary material for: Sepsis leads to lasting changes in phenotype and function of memory CD8 T cells
Source: eLife. 2021 Oct 15;10:e70989. doi: 10.7554/eLife.70989 (PMC8589447; doi:10.7554/eLife.70989)
Supplement: Figure 1—figure supplement 1—source data 1. [file elife-70989-fig1-figsupp1-data1.xlsx]

## Sheet: Figure 1-FS1-source data
	% subset of CD8 T cells											% subset of Ki67+ CD8 T cells
	Naive		Eff		EM		CM		SCM			Naive		Eff		EM		CM		SCM
	HC	Septic	HC	Septic	HC	Septic	HC	Septic	HC	Septic		HC	Septic	HC	Septic	HC	Septic	HC	Septic	HC	Septic
	71.1109	55.9062	4.3632	17.9946	6.3072	5.2416	15.1931	18.8703	4.36015	4.53357		20.016	13.6606	2.6656	18.2	25.34	0	40.032	54.5606	13.32	13.6606
	75.075	30.682	3.4121	22.2224	11.3687	12.1776	8.9232	31.2156	2.0163	5.82291		13.64	6.664	4.5474	6.66	27.2526	13.34	49.9906	46.64	9.0706	26.64
	22.3034	86.524	10.1528	1.11969	28.4984	1.49031	39.249	8.2062	1.38306	2.9876		2.94168	0	5.8828	0	32.3172	0	47.0916	50	11.742	50
	21.164	27.753	19.803	30.8652	36.6212	26.2412	21.472	15.1815	1.76	0.696		4.04505	12.4872	8.0938	24.9744	48.5062	23.4256	35.8225	32.8176	5.2065	6.2436
	65.6616	12.169	17.7859	30.5214	7.2358	26.6686	4.87191	26.703	5.06769	4.429		14.8452	4.7625	23.1324	4.7619	20.3352	36.5508	30.58	50.8	10.1748	7.9375
	51.3573	49.678	33.9905	16.3976	8.7033	24.1844	6.7164	8.614	0.2316	0.9322		11.1	3.69852	28.3836	14.825	34.5312	44.475	20.979	33.3	4.921	7.4148
	43.9599	29.9465	22.3214	10.668	25.0038	39.5732	7.6705	20.503	1.35953	0.62115		10.6285	1.9364	9.324	20.7824	18.676	62.3472	38.6291	15.5664	23.9691	1.2972
	22.143	36.1938	41.4735	16.0866	22.317	16.5169	13.8303	26.623	0.69333	4.7854		4.418	2.85795	44.1405	7.6146	30.906	26.6854	17.625	47.6325	1.46875	15.2424
	10.176	44.2068	47.6593	13.1619	31.0063	8.4315	10.4092	29.944	0.65508	4.94864		4.5645	4.288	21.8195	7.14	50.9625	12.86	17.3145	64.32	3.6465	11.44
	13.6268	24.2892	52.5742	45.1801	15.6604	9.6222	4.3681	19.7964	3.0305	2.82672		6.764	6.4022	32.1907	26.9346	25.4485	16.6782	15.2724	39.7044	13.5636	7.6934
	15.3734	30.1782	27.1524	38.4314	44.5038	18.1686	10.2026	12.7896	2.33242	0.82782		0.60996	0	10.9746	13.325	28.0194	39.975	31.096	46.6375	28.0462	6.6625
	16.4428	23.1312	31.3635	48.1828	28.8057	7.3024	19.1092	3.54288	5.4944	10.431		2.2784	22.977	4.56	18.3816	6.84	12.6207	37.469	11.523	49.306	34.5
	56.4879	16.412	11.7594	15.08	14.8896	10.426	13.4495	38.3444	3.09702	19.9182		4.75948	0.27636	6.35	0.274	19.05	1.096	46.0282	61.4901	23.7974	36.9138
	45.2124	66.3255	9.0396	11.2138	23.0688	13.4862	21.888	9.945	1.52532	0.20655		11.297	0	8.0682	10	14.5318	30	62.884	49.98	4.8348	10.02
	38.2398	30.8115	14.3964	31.9606	36.7392	19.0106	9.6333	18.036	1.24206	1.78356		3.26511	2.53005	3.255	4.4289	18.445	12.0384	47.8413	64.5455	27.1701	16.4495
	20.8656	44.955	31.7383	27.5035	34.3552	1.28975	11.6928	0.85725	1.16592	22.14		4.9654	42.8786	8.5244	17.3231	31.1888	0	43.249	0	12.749	37.6184
		23.1264		26.0075		19.594		21.0144		9.768			13.2252		16.1586		19.1		41.2206		7.3542
		49.8134		10.4075		7.6925		24.9067		9.4962			28.3853		13.4366		11.9634		32.7991		16.4376
		33.7273		4.61045		3.74545		55.5995		6.62599			0		2.0825		6.2475		66.6659		25.0341
		22.16		1.5456		20.6528		57.28		1.352			4.45942		0.95518		28.0401		69.0802		1.27624
		64.935		3.91742		4.01258		25.0675		3.56125			19.9662		6.67		0		59.9919		13.3419
		68.4342		10.6932		2.4339		9.8762		9.5266			41.2528		8.5224		4.8776		19.8398		27.094
		9.13		7.3944		37.8252		40.205		5.885			9.4419		4.893		14.385		45.9183		25.2591
		36.2136		17.3475		6.6049		14.3632		27.5804			39.0216		13.0845		1.6995		9.372		38.1696
		44.6522		14.1		8.9535		29.7942		5.5131			33.3684		9.8464		7.9097		40.4064		11.592
		43.1648		26.0993		9.1545		17.3184		5.60224			2.93706		2.95		8.85		64.6506		20.5506
		14.4078		35.7896		29.216		18.585		2.40012			0		0		33.3		33.35		33.35
