# Supplementary material for: Sepsis leads to lasting changes in phenotype and function of memory CD8 T cells
Source: eLife. 2021 Oct 15;10:e70989. doi: 10.7554/eLife.70989 (PMC8589447; doi:10.7554/eLife.70989)
Supplement: Figure 1—source data 1. [file elife-70989-fig1-data1.xlsx]

## Sheet: Figure 1-source data 1
	% CD8s of lymphocytes			# of CD8s per mL of blood			% Ki67+ of CD8s			% Ki67+ of CD8s (Naïve)			% Ki67+ of CD8s (Eff)			% Ki67+ of CD8s (EM)			% Ki67+ of CD8s (CM)			% Ki67+ of CD8s (SCM)
	HC	Septic		HC	Septic		HC	Septic		HC	Septic		HC	Septic		HC	Septic		HC	Septic		HC	Septic
	19.2	27.4		186642	411321		0.87	0.9		0.170666	0.122994		0.023125	0.163751		0.21886	0		0.347922	0.490628		0.115544	0.122406
	13.4	3.3		228384	69376.2		0.34	7.94		0.0472972	0.52773		0.0156957	0.528893		0.0932233	1.05945		0.172218	3.71466		0.0312526	2.11954
	14.2	2.06		145472	31931.2		0.81	2.99		0.0245337	0		0.0477182	0		0.262185	0		0.380715	1.49353		0.0954311	1.4938
	11.4	18.9		335350	197761		3.14	1.17		0.126984	0.147091		0.253478	0.293219		1.52344	0.275533		1.12728	0.384092		0.163328	0.07308
	19.9	5.95		444442	27389.1		1.77	18.7		0.262646	0.890771		0.409076	0.888173		0.361066	6.82716		0.540782	9.50627		0.18041	1.47486
	23	4.64		198413	39553		1.43	2.1		0.159208	0.0794848		0.407886	0.311554		0.496088	0.933518		0.300223	0.698595		0.0713328	0.155677
	16.3	4.64		149555	27700.6		1.32	16		0.140672	0.311444		0.122768	3.31775		0.247538	9.97245		0.510088	2.48086		0.31813	0.206843
	10.3	15.1		146314	133701		1.69	2.37		0.0752862	0.0687682		0.746523	0.18017		0.522218	0.632597		0.297351	1.12882		0.0247519	0.361298
	14.4	5.19		111801	49699.4		2.19	5.09		0.0997248	0.216613		0.476593	0.363268		1.11313	0.654284		0.377854	3.2639		0.0792647	0.58394
	26.4	7.34		583990	71423.5		1.11	6.48		0.0749474	0.415345		0.357505	1.74395		0.283453	1.07769		0.170356	2.57353		0.151525	0.497503
	15.7	2.7		144639	8169.22		3.06	6.2		0.0184481	0		0.33669	0.826275		0.858923	2.47093		0.952923	2.89045		0.858331	0.41391
	10.1	11.2		60267.2	93216.6		7.16	2.28		0.162784	0.525078		0.32618	0.41919		0.489697	0.287715		2.67529	0.262527		3.5329	0.786497
	10.4	18.8		159845	276656		1.36	42.1		0.0677855	0.114884		0.0870196	0.116116		0.259079	0.461872		0.629437	25.8825		0.325187	15.5163
	23.7	5.1		582954	52685.5		1.09	2.08		0.122073	0		0.0876841	0.207455		0.156868	0.623062		0.682906	1.03428		0.0526235	0.20655
	17.5	26.2		113897	431435		1.59	3.03		0.0535357	0.0770288		0.051827	0.134235		0.293914	0.365004		0.761031	1.96592		0.430995	0.499397
	15.2	16		133603	237080		2.42	28.6		0.118934	12.2727		0.206299	4.95063		0.752379	0		1.04534	0		0.308969	10.7379
		29.4			535477			1.66			0.219701			0.267877			0.317423			0.685069			0.1221
		4.21			45403.3			30.3			8.61772			4.06933			3.62317			9.96268			4.97601
		5.45			55478.8			13.8			0			0.288153			0.865199			9.22952			3.45877
		8.46			93386			60.5			2.70352			0.5796			16.9766			41.8717			0.771992
		11.7			114854			1.34			0.266234			0.0889254			0			0.80216			0.178063
		26.4			1.72368e+06			8.66			3.57911			0.7389			0.423499			1.71846			2.34354
		48			1.32806e+06			4.81			0.457413			0.235142			0.692201			2.2153			1.21231
		17.3			295659			36.2			14.1233			4.75321			0.61954			3.40408			13.8454
		33.4			414748			17.8			5.93874			1.7484			1.4057			7.2102			2.06741
		6.56			404349			8.66			0.254672			0.255773			0.76257			5.61116			1.78151
		9.79			168247			0.6			0			0			0.198669			0.200718			0.19993
