# Supplementary material for: Sepsis leads to lasting changes in phenotype and function of memory CD8 T cells
Source: eLife. 2021 Oct 15;10:e70989. doi: 10.7554/eLife.70989 (PMC8589447; doi:10.7554/eLife.70989)
Supplement: Figure 2—source data 1. [file elife-70989-fig2-data1.xlsx]

## Sheet: Figure 2-source data 1
Pre-bleed					D2 post-surgery					% survival
	# of Endo Ag Exp CD8 T cells	# of Ag Exp P14 CD8 T cells	# of Endo Naive CD8 T cells			# of Endo Ag Exp CD8 T cells	# of Ag Exp P14 CD8 T cells	# of Endo Naive CD8 T cells		# of Endo Ag Exp CD8 T cells	# of Ag Exp P14 CD8 T cells	# of Endo Naive CD8 T cells
_002__001.fcs	540078	6116.15	503916		_002 (Sham)__001.fcs	437394	5135.39	455355		90.3632	80.9871	83.9644
_002__002.fcs	435756	3071.8	567241		_002 (Sham)__002.fcs	364550	2606.55	501731		88.4511	83.6592	84.8543
_002__003.fcs	299163	18515.1	391638		_002 (Sham)__003.fcs	373168	21284.4	509532		130.103	124.737	114.957
_002__004.fcs	478750	6749.11	462698		_002 (Sham)__004.fcs	339018	4710.49	430374		93.0139	70.8131	69.7942
_002__005.fcs	552853	3337.14	509128		_002 (Sham)__005.fcs	685130	5105.7	689960		135.518	123.926	152.996
_001__001.fcs	294325	7147.03	394620		_001 (CLP)__001.fcs	82910.3	2320.12	92079.8		23.3338	28.1697	32.4628
_001__002.fcs	203989	8763.67	285282		_001 (CLP)__002.fcs	63393	2746.15	72901.6		25.5542	31.0766	31.3356
_001__003.fcs	204172	3891.97	225543		_001 (CLP)__003.fcs	68681.7	1283.37	80849.2		35.8465	33.6391	32.975
_001__004.fcs	338613	8934.66	315684		_001 (CLP)__004.fcs	87804	2031.09	60316.1		19.1065	25.9305	22.7327
_003__001.fcs	173573	13998.4	172461		_003 (CLP)__001.fcs	56892.6	3770.58	73103.7		42.3886	32.7774	26.9358
_003__002.fcs	214687	12758.4	193966		_003 (CLP)__002.fcs	53161.4	3316.23	34610.9		17.8438	24.7622	25.9925
