# Supplementary material for: Sepsis leads to lasting changes in phenotype and function of memory CD8 T cells
Source: eLife. 2021 Oct 15;10:e70989. doi: 10.7554/eLife.70989 (PMC8589447; doi:10.7554/eLife.70989)
Supplement: Figure 2—source data 2. [file elife-70989-fig2-data2.xlsx]

## Sheet: Figure 2-source data 2
D9 post-surgery % Ki67+ of CD8 T cells
Sham	CLP
8.58	26.8
8.18	33
8.77	51.1
11.7	28.2
19	24.4
