# Supplementary material for: Sepsis leads to lasting changes in phenotype and function of memory CD8 T cells
Source: eLife. 2021 Oct 15;10:e70989. doi: 10.7554/eLife.70989 (PMC8589447; doi:10.7554/eLife.70989)
Supplement: Figure 2—source data 3. [file elife-70989-fig2-data3.xlsx]

## Sheet: Figure 2-source data 3
# of P14 CD8 cells per mL of blood
	DPSurgery	Sham										CLP
		Exp 1							Exp 2			Exp 1									Exp 2
d0	0	13291.3		13620.1	5156.55	8304.54	9904.39	16743.7	6116.15	18515.1	6749.11	5033.15	20044.9	14038	2119.89	8254.85	15426.6	15822.9	25523.3	1846.15	8763.67	13998.4	12758.4
d2	2	13492.3	6501.6	8656.76	5037.65	12494.9	20489.7	25512.7	5135.39	21284.4	4710.49	2410.12	5596.49	3517.17	1456.32	3951.78	14738.7	8911.77	9236.1	1092.56	2746.15	3770.58	3316.23
wk2	15	12899.7	3204.44	5880.37	4550.85	18335.4	21337.6	17099	5861.31	23083.7	7632.92	3713.54	31559	12604.2	2457.81	12213.4	29003.9	10682.6	26085	8038.3	11797.2	24497.2	21066.3
wk4	30	10298.9	2487.99	7763.98	5943.03	15132.3	22458	12991.7	6598.36	11399.9	8489.53	2416.61	21140.5	17362.5	3193.44	16745.9	29563.1	9760.08	26944.1	6447.09	9418.56	12192.6	14055.1
