# Supplementary material for: Sepsis leads to lasting changes in phenotype and function of memory CD8 T cells
Source: eLife. 2021 Oct 15;10:e70989. doi: 10.7554/eLife.70989 (PMC8589447; doi:10.7554/eLife.70989)
Supplement: Figure 3—source data 1. [file elife-70989-fig3-data1.xlsx]

## Sheet: Figure 3-source data 1
Sample:	CLP1	CLP2	CLP3	Sham1	Sham2	Sham3	Sham4
CLP1/FlowSOM.Pop1	1.22	3.83	6.48	9.3	2.28	1.87	3.78
CLP1/FlowSOM.Pop2	1.32	3.83	8.11	4.07	0.25	1.6	2.1
CLP1/FlowSOM.Pop3	1.93	1.61	2.53	0.58	0.25	1.34	0
CLP1/FlowSOM.Pop4	1.72	2.11	2.13	0	0.76	1.87	0
CLP1/FlowSOM.Pop5	0	0	0	0	0	0	0
CLP1/FlowSOM.Pop6	6.28	15.5	16.8	33.7	22.8	14.2	20.2
CLP1/FlowSOM.Pop7	6.89	6.55	6.18	8.14	5.58	8.02	12.6
CLP1/FlowSOM.Pop8	74.7	55.4	54.5	34.9	51.8	64.4	51.3
CLP1/FlowSOM.Pop1	3.0875	0.4775	-2.1725
CLP1/FlowSOM.Pop2	0.685	-1.825	-6.105
CLP1/FlowSOM.Pop3	-1.3875	-1.0675	-1.9875
CLP1/FlowSOM.Pop4	-1.0625	-1.4525	-1.4725
CLP1/FlowSOM.Pop5	0	0	0
CLP1/FlowSOM.Pop6	16.445	7.225	5.925
CLP1/FlowSOM.Pop7	1.695	2.035	2.405
CLP1/FlowSOM.Pop8	-24.1	-4.8	-3.9
