# Supplementary material for: Sepsis leads to lasting changes in phenotype and function of memory CD8 T cells
Source: eLife. 2021 Oct 15;10:e70989. doi: 10.7554/eLife.70989 (PMC8589447; doi:10.7554/eLife.70989)
Supplement: Figure 4—source data 1. [file elife-70989-fig4-data1.xlsx]

## Sheet: Figure 4-source data 1
	% Ki67+ of CD62L- P14 CD8 T cells										% Ki67+ of CD62L+ P14 CD8 T cells
DPS	CLP					Sham					CLP					Sham
0	5.09	3.82	6.06	4.58		5.41	3.09	3.64	4.26		7.8	5.37	8.84	6.58		9.89	5.83	6.5	5.99
5		8.46	12.4	6.76	6.43	14.7	9.22	4.78	4.97	5.02		8.4	9.35	6.93	7.22	22	16.2	9.48	6.93	5.91
9	19.9	24.4	30.4	28.6	29	4.71	4	5.98	8.49	8.55	26.3	34.6	37.6	37.4	36.1	8.17	6	9.69	11.7	10.8
16		3.61	4.55	2.6	4.94	4.09	1.95	5.16	4.78	3.79		6.95	10.6	6.04	4.74	8.6	6.48	11.8	8.68	4.69
* missing samples due to extreme clotting in blood samples
