# Supplementary material for: Sepsis leads to lasting changes in phenotype and function of memory CD8 T cells
Source: eLife. 2021 Oct 15;10:e70989. doi: 10.7554/eLife.70989 (PMC8589447; doi:10.7554/eLife.70989)
Supplement: Figure 4—source data 2. [file elife-70989-fig4-data2.xlsx]

## Sheet: Figure 4-source data 2
D16 post-surgery	% BrdU+ of CD62L- P14 CD8 T cells										% BrdU+ of CD62L+ P14 CD8 T cells
	CLP				Sham					CLP				Sham
P14	16.9	17.3	16.6	16.6	7.58	8.24	7.74	10.4	6.43	28.9	33.7	25.8	28.7	11.3	20	20.5	21.5	13.9
Endo	14.2	13.6	14.7	15.2	8.66	6.26	7.37	7.25	5.84	28.7	33.5	26	27.6	16.5	21.4	25	22.4	19.2
	% CD62L+ of P14 CD8 T cells
	CLP				Sham
P14	54.4	51.8	53.6	58.9	44.8	42.9	47.6	52.1	41.9
Endo	48.6	48.6	50.4	52.8	39.9	44.7	48.1	50.5	42.5
