# Supplementary material for: Sepsis leads to lasting changes in phenotype and function of memory CD8 T cells
Source: eLife. 2021 Oct 15;10:e70989. doi: 10.7554/eLife.70989 (PMC8589447; doi:10.7554/eLife.70989)
Supplement: Figure 4—source data 3. [file elife-70989-fig4-data3.xlsx]

## Sheet: Figure 4-source data 3
Sample:	Large/Lymphocytes | Freq. of Parent	Large/Lymphocytes/Singlets | Freq. of Parent	Large/Lymphocytes/Singlets/CD8s | Freq. of Parent	Large/Lymphocytes/Singlets/CD8s/Ag-Exp | Freq. of Parent	Large/Lymphocytes/Singlets/CD8s/Ag-Exp/Endo | Freq. of Parent	Large/Lymphocytes/Singlets/CD8s/Ag-Exp/Endo/CD62L+ | Freq. of Parent	Large/Lymphocytes/Singlets/CD8s/Ag-Exp/P14 | Freq. of Parent			ratio P14s among lymphocytes relative to spleen
Liver_CLP_001_001.fcs	66.6	73.9	20.3	54.9	97.1	11	2.93	0.3223	1.76943	0.872767
Liver_CLP_001_004.fcs	70.6	88.1	32.7	66.3	99.1	3.04	0.95	0.02888	0.191474	0.119528
Liver_CLP_003_002.fcs	74.8	79	32.2	79.9	90.2	4.72	9.77	0.461144	3.68454	0.286721
Liver_CLP_003_003.fcs	76.3	76.7	17.3	66	93	18.4	7.03	1.29352	8.53723	0.86388
Liver_CLP_003_004.fcs	78.3	82.2	25	81.6	86.4	8.62	13.6	1.17232	9.56613	0.514005
Liver_CLP_006_002.fcs	87.2	89.3	32.6	84.3	98.6	3.92	1.39	0.054488	0.459334	0.123172
Liver_Sham_002_001.fcs	77.5	74	24.6	71.3	94.8	11.8	5.17	0.61006	4.34973	0.716406
Liver_Sham_002_002.fcs	71.2	70.8	22.6	66.3	98.3	22.5	1.72	0.387	2.56581	0.814722
Liver_Sham_002_003.fcs	70.3	65.9	24.7	72.4	96.9	20.5	3.14	0.6437	4.66039	0.810649
Liver_Sham_002_004.fcs	75.7	77.8	26	76.4	96.9	15	3.09	0.4635	3.54114	0.628563
Liver_Sham_004_002.fcs	80.1	83.7	25	55.1	93.3	13.3	6.65	0.88445	4.87332	0.522517
Liver_Sham_004_003.fcs	81.3	76.9	26.2	78.6	93.8	10.1	6.19	0.62519	4.91399	0.61329
Liver_Sham_004_004.fcs	81.8	76.9	24.7	80.7	92.9	11.6	7.07	0.82012	6.61837	0.621551
PBL_CLP_001_001.fcs	94.3	91.8	13.7	45.8	98.4	33.5	1.57	0.52595	2.40885	1.18816
PBL_CLP_001_004.fcs	88.8	92.7	17.9	64.4	99.2	21.2	0.78	0.16536	1.06492	0.664777
PBL_CLP_003_002.fcs	89.5	92.8	21.7	68.9	88.4	23	11.5	2.645	18.2241	1.41815
PBL_CLP_003_003.fcs	95	92.2	11.7	46.2	94.5	48	5.41	2.5968	11.9972	1.21399
PBL_CLP_003_004.fcs	71.1	84.3	21.2	81	85.3	20.1	14.5	2.9145	23.6075	1.26847
PBL_CLP_006_002.fcs	85.1	87.3	21.5	73.4	98.7	17.2	1.34	0.23048	1.69172	0.453642
PBL_Sham_002_001.fcs	93	91.2	13.1	48.5	94.6	37.9	5.3	2.0087	9.74219	1.60455
PBL_Sham_002_002.fcs	91.8	91.4	12.5	48.7	98.2	48.2	1.71	0.82422	4.01395	1.27455
PBL_Sham_002_003.fcs	96.5	91.4	13.4	52.8	97	49.7	2.9	1.4413	7.61006	1.32373
PBL_Sham_002_004.fcs	95.1	90.7	12.9	60.3	97.1	32.6	2.83	0.92258	5.56316	0.987477
PBL_Sham_004_002.fcs	93.8	91.2	12	47.4	92.2	37.1	7.6	2.8196	13.3649	1.43298
PBL_Sham_004_003.fcs	87	87.5	14.5	51.9	93.1	27.8	6.82	1.89596	9.84003	1.22808
PBL_Sham_004_004.fcs	94.6	88.9	13.7	56.6	92.4	29.6	7.52	2.22592	12.5987	1.18318
Spleen_CLP_001_001.fcs	89	89.4	17.7	36.1	98.5	39	1.44	0.5616	2.02738	1
Spleen_CLP_001_004.fcs	88.1	84.1	16.5	59.5	98.9	24.7	1.09	0.26923	1.60192	1
Spleen_CLP_003_002.fcs	87.7	84.5	17.6	58.7	91.3	26	8.42	2.1892	12.8506	1
Spleen_CLP_003_003.fcs	91.9	88.1	15.1	38.7	93.4	39.9	6.4	2.5536	9.88243	1
Spleen_CLP_003_004.fcs	89.5	85.4	15.9	59.8	88.4	27.3	11.4	3.1122	18.611	1
Spleen_CLP_006_002.fcs	93.2	87.7	20.1	55.9	97.3	24.8	2.69	0.66712	3.7292	1
Spleen_Sham_002_001.fcs	93.4	89.7	17.3	40.5	95.9	37.2	4.03	1.49916	6.0716	1
Spleen_Sham_002_002.fcs	92.1	89.5	15.9	38.1	98.2	46.7	1.77	0.82659	3.14931	1
Spleen_Sham_002_003.fcs	91.7	88	16	43.5	97	44.8	2.95	1.3216	5.74896	1
Spleen_Sham_002_004.fcs	93.7	87.3	18.4	47.8	97.1	41.5	2.84	1.1786	5.63371	1
Spleen_Sham_004_002.fcs	94.7	89.4	16.7	37.5	93.9	41.8	5.95	2.4871	9.32662	1
Spleen_Sham_004_003.fcs	95.7	88.4	17.5	36.2	93.6	35.7	6.2	2.2134	8.01251	1
Spleen_Sham_004_004.fcs	96.4	87.9	16.3	40.3	92.9	37.8	6.99	2.64222	10.6481	1
medLN_CLP_001_001.fcs	87	76	14.7	42.9	97.1	53.8	2.91	1.56558	6.71634	3.31282
medLN_CLP_001_004.fcs	95.4	75.4	13.5	35.7	99	42.9	0.98	0.42042	1.5009	0.936939
medLN_CLP_003_002.fcs	87.2	65.6	17.7	36.4	90.3	50.6	9.73	4.92338	17.9211	1.39457
medLN_CLP_003_003.fcs	86.4	73.4	22.7	29.6	95	71.9	5.02	3.60938	10.6838	1.08109
medLN_CLP_003_004.fcs	93.8	81	16	40.6	90.5	62.5	9.48	5.925	24.0555	1.29255
medLN_CLP_006_002.fcs	89.9	80.4	15.8	50.9	96.8	50.7	3.17	1.60719	8.1806	2.19366
medLN_Sham_002_001.fcs	88.1	76.7	52.5	11.3	96.4	37.9	3.62	1.37198	1.55034	0.255343
medLN_Sham_002_002.fcs	88.8	77.6	31.1	19.9	97.9	60.4	2.09	1.26236	2.5121	0.797666
medLN_Sham_002_003.fcs	90.4	82.3	22.6	25.1	97.3	67.5	2.73	1.84275	4.6253	0.804546
medLN_Sham_002_004.fcs	89.7	83.5	19	34.8	97.5	54.5	2.47	1.34615	4.6846	0.831531
medLN_Sham_004_002.fcs	98.3	84	61.1	17.4	99.8	48.9	0.23	0.11247	0.195698	0.0209827
medLN_Sham_004_003.fcs	98.1	88.9	67.3	9.52	99.1	42	0.94	0.3948	0.37585	0.0469079
medLN_Sham_004_004.fcs	98	90.4	23.7	14	95.3	74.7	4.68	3.49596	4.89434	0.459643
mesLN_CLP_001_001.fcs	97.3	78.6	14.4	19.3	98.9	71.8	1.1	0.7898	1.52431	0.751865
mesLN_CLP_001_004.fcs	96.1	70.4	12.4	27.3	99	61.2	0.95	0.5814	1.58722	0.990826
mesLN_CLP_003_002.fcs	95.8	76.5	14.5	29.5	88.8	69.6	10.7	7.4472	21.9692	1.70959
mesLN_CLP_003_003.fcs	95.2	77.9	12.8	26.5	95.2	75.7	4.49	3.39893	9.00716	0.911432
mesLN_CLP_003_004.fcs	95.4	73.1	8.52	35	90.4	73.9	9.35	6.90965	24.1838	1.29944
mesLN_CLP_006_002.fcs	96.6	82.8	14	30.4	96.8	61	3.1	1.891	5.74864	1.54152
mesLN_Sham_002_001.fcs	98.1	82	23.2	16	95.8	80.5	4.09	3.29245	5.26792	0.867633
mesLN_Sham_002_002.fcs	98.3	83.7	21.8	17.9	97.5	80.7	2.4	1.9368	3.46687	1.10084
mesLN_Sham_002_003.fcs	97.8	84.1	26	19.1	97.7	82.6	2.21	1.82546	3.48663	0.60648
mesLN_Sham_002_004.fcs	97.4	85.6	22.5	19.1	97.8	77.3	2.18	1.68514	3.21862	0.571314
mesLN_Sham_004_002.fcs	98.1	84.3	18.8	16.8	95	80.6	4.9	3.9494	6.63499	0.711403
mesLN_Sham_004_003.fcs	97.8	84.9	18.4	16.7	95.5	78.6	4.38	3.44268	5.74928	0.717538
mesLN_Sham_004_004.fcs	98.2	87.8	18.1	16.2	95.8	81.5	4.03	3.28445	5.32081	0.499693
