# Supplementary material for: Sepsis leads to lasting changes in phenotype and function of memory CD8 T cells
Source: eLife. 2021 Oct 15;10:e70989. doi: 10.7554/eLife.70989 (PMC8589447; doi:10.7554/eLife.70989)
Supplement: Figure 5—source data 1. [file elife-70989-fig5-data1.xlsx]

## Sheet: Figure 5-source data 1
gene_id	Group_A_0	Group_A_1	Group_A_2	Group_B_0	Group_B_1	Group_B_2	Group_C_0	Group_C_1	Group_C_2	Group_D_0	Group_D_1		heatmap z-scores
Hbb-b2	2.13696	0.13078	2.48991	0.115841	0.111253	0.124374	2.48537	3.42914	0.32831	0.484838	2.31191		0.66736	-0.906426	0.944239	-0.918145	-0.921745	-0.911452	0.940677	1.68104	-0.75147	-0.628679	0.804603
Tppp	0.921261	0.832402	0.982645	0.0808019	0.106702	0.0650654	1.7927	2.26506	2.04195	1.95513	1.46362		-0.261916	-0.369779	-0.187404	-1.28212	-1.25068	-1.30122	0.795896	1.36928	1.09845	0.993065	0.396436
Lrrc23	4.52735	4.49302	4.18706	0.477574	0.458658	0.341836	5.74416	4.74809	5.26366	4.83049	2.48641		0.534892	0.518393	0.371347	-1.41144	-1.42054	-1.47668	1.11969	0.64098	0.888765	0.680582	-0.445991
Tppp3	3.14555	1.63063	1.77013	0.180545	0.28899	0.193845	2.5237	4.85865	2.89958	0.692677	2.29773		0.868425	-0.156542	-0.0621592	-1.13764	-1.06427	-1.12864	0.447692	2.02748	0.702006	-0.791144	0.294805
Adgre4	1.58483	0.627141	1.17193	0.330299	0.0720946	0.0805976	1.55201	1.97975	0.936114	0.267059	0.325691		1.14815	-0.273884	0.53505	-0.714653	-1.09805	-1.08542	1.09942	1.73455	0.184897	-0.808555	-0.721495
Lmna	4.14438	3.69207	3.34972	0.489481	0.888019	0.477143	6.96676	9.5575	7.52484	6.27608	8.21125		-0.168213	-0.307955	-0.413725	-1.2974	-1.17427	-1.30122	0.70377	1.50419	0.87619	0.490382	1.08826
Trf	10.1722	3.84865	6.87353	2.29587	0.846337	0.522876	7.91561	10.2765	6.222	2.15961	2.09279		1.47773	-0.274316	0.563776	-0.70454	-1.10616	-1.19578	0.852502	1.50662	0.383259	-0.742293	-0.760806
Tnfrsf8	0.664015	0.650194	0.610805	0.215971	0.103708	0.0772933	0.386137	0.904087	0.544082	0.263643	0.281104		0.893118	0.840957	0.692301	-0.797817	-1.2215	-1.32119	-0.155604	1.79916	0.440486	-0.617901	-0.552003
Zfp385a	0.775483	0.266956	0.722256	0.260108	0.0908383	0.025388	0.737931	0.509073	0.536133	0.173194	0.184665		1.40167	-0.443933	1.20849	-0.468787	-1.08312	-1.32066	1.26538	0.434784	0.532993	-0.784225	-0.742593
Crip2	4.50473	3.02251	4.15881	0.959016	0.882654	0.900952	5.76741	5.4842	5.47372	2.96856	3.32864		0.588695	-0.204501	0.403579	-1.30876	-1.34962	-1.33983	1.26441	1.11285	1.10724	-0.233372	-0.0406785
Hpgd	3.07127	1.02969	2.02674	1.04236	0.218986	0.20984	2.41428	2.77588	2.03102	0.681668	0.734892		1.55848	-0.436088	0.538001	-0.423709	-1.22812	-1.23706	0.916617	1.26989	0.542183	-0.776095	-0.724097
Igf1	1.08884	0.314142	0.693833	0.321546	0.0897402	0.119835	1.12116	0.827328	0.509494	0.35074	0.290342		1.56502	-0.568755	0.477041	-0.548362	-1.18683	-1.10394	1.65404	0.844731	-0.0306898	-0.467951	-0.634308
Hbb-b1	0.00349898	0.648765	6.52759	0.805399	0.107259	0.923918	0.0204708	9.63028	1.18942	2.05158	1.62991		-0.692389	-0.483256	1.42208	-0.432491	-0.65876	-0.394079	-0.686888	2.42767	-0.308029	-0.0286009	-0.165265
Armc2	0.640342	0.561921	0.407328	0.201211	0.142389	0.0795911	0.49573	0.351486	0.390179	0.587283	0.404326		1.37655	0.949711	0.108275	-1.0136	-1.33376	-1.67557	0.589439	-0.195668	0.0149348	1.08775	0.0919356
Slc40a1	10.6535	3.47334	5.48435	3.21643	1.5669	0.950925	7.34937	9.78472	5.3726	1.7559	1.88761		1.77238	-0.358533	0.238292	-0.434778	-0.924324	-1.10713	0.79179	1.51455	0.205127	-0.868232	-0.829144
Capsl	0.272644	0.825935	0.677148	0.133016	0.191621	0.214222	1.03777	0.656258	0.753973	1.18303	0.692526		-0.930256	0.625565	0.207185	-1.32288	-1.15809	-1.09454	1.22123	0.148444	0.423212	1.6297	0.250427
Fn3k	1.88188	0.931376	0.805665	0.368109	0.467419	0.263838	1.55288	0.998189	1.0685	1.8658	1.73798		1.33287	-0.258158	-0.468583	-1.201	-1.03477	-1.37554	0.782165	-0.146321	-0.0286288	1.30596	1.092
Adgre1	2.94376	1.06261	1.67061	0.973686	0.748096	0.226505	2.26312	3.02788	1.76305	0.679205	0.619585		1.55646	-0.40701	0.227597	-0.499825	-0.735287	-1.2797	0.846036	1.64426	0.324082	-0.807193	-0.869422
Nrn1l	1.22457	1.49454	1.90608	0.84235	0.230988	0.516725	1.40822	1.07944	1.02319	1.62532	0.834912		0.236801	0.784508	1.61943	-0.538636	-1.77895	-1.19925	0.609385	-0.0576346	-0.171753	1.04983	-0.553726
Cnga1	3.51278	4.30935	4.07583	1.2464	1.5337	1.3173	4.15936	3.2843	3.1829	3.32153	2.36584		0.50265	1.1983	0.994365	-1.47659	-1.22569	-1.41468	1.06731	0.303117	0.214564	0.335631	-0.498979
Tspan2	3.30386	2.45818	3.56393	0.90774	0.822006	1.53542	2.47932	3.56586	2.89595	1.71825	2.26941		1.00091	0.14058	1.26548	-1.43671	-1.52393	-0.798162	0.162086	1.26745	0.585932	-0.612165	-0.0514594
Rpph1	2.05832	5.89529	3.63529	1.20505	1.15732	1.72508	9.40153	9.00804	6.83054	7.98563	7.31952		-0.945897	0.242997	-0.457269	-1.21028	-1.22507	-1.04915	1.32941	1.20749	0.532786	0.890693	0.684297
Adamdec1	0.801703	0.328025	0.556255	0.402306	0.193186	0	0.566712	0.78191	0.380064	0.11693	0.193939		1.55681	-0.246708	0.62227	0.0361142	-0.760103	-1.49565	0.662085	1.48144	-0.0485715	-1.05045	-0.757236
Aldh2	2.50117	1.24136	1.9727	1.09949	0.592677	0.345749	2.45936	2.06893	1.44453	0.336967	0.558768		1.42394	-0.106784	0.781823	-0.279162	-0.89496	-1.19499	1.37313	0.898746	0.140075	-1.20566	-0.936161
C6	1.38092	0.422554	0.677471	0.355572	0.305542	0.241114	1.11329	0.570769	0.49503	0.195815	0.292299		2.19837	-0.33729	0.337175	-0.514512	-0.646882	-0.817347	1.49027	0.0548606	-0.145531	-0.9372	-0.681921
Tktl1	0.758529	0.860159	0.837293	0.282993	0.146345	0.467444	1.0827	2.32373	1.23391	0.842766	1.19002		-0.261512	-0.087707	-0.126812	-1.07476	-1.30845	-0.759318	0.292877	2.41525	0.551472	-0.117452	0.476413
Thbs3	0.560259	0.691981	0.599695	0.182224	0.254555	0.249006	0.726994	0.698424	0.719899	0.728008	0.661229		0.0383037	0.651055	0.221754	-1.72026	-1.38379	-1.4096	0.81393	0.681026	0.780925	0.818647	0.508001
Nebl	1.65793	1.42496	1.58876	0.444431	0.529266	0.76347	1.45629	2.47175	2.04892	0.911452	1.45002		0.504521	0.134054	0.394527	-1.42517	-1.29027	-0.917839	0.183875	1.79865	1.12627	-0.68252	0.173905
Myadm	7.52974	6.4232	7.9399	2.3346	2.4199	3.44876	8.3425	11.6204	10.4388	7.78542	8.80777		0.168557	-0.189116	0.301135	-1.51069	-1.48312	-1.15056	0.431269	1.4908	1.10887	0.251202	0.581661
Pygl	0.831017	0.596097	0.746646	0.358289	0.271656	0.22271	2.09648	1.9453	1.924	2.1507	1.84901		-0.436349	-0.729172	-0.541516	-1.02559	-1.13358	-1.19459	1.14102	0.952582	0.926032	1.20861	0.832558
Emc8-1190005i06rik	3.16224	3.1144	1.31158	1.07093	0.914652	0.996553	1.6826	0.717969	1.13197	2.55493	1.98346		1.65166	1.59782	-0.431133	-0.701968	-0.877848	-0.785674	-0.0135752	-1.0992	-0.633272	0.968173	0.325022
Ang	0.603509	0.989149	0.596878	0.264368	0.291843	0.305463	0.694369	0.925689	0.767672	0.625505	0.686007		-0.04169	1.53941	-0.0688766	-1.43215	-1.3195	-1.26366	0.33083	1.27923	0.631367	0.0484922	0.296546
Bfsp1	0.746481	0.488237	0.64377	0.295886	0.153028	0.293244	1.28753	1.51099	1.5483	1.04795	0.829545		-0.117119	-0.642152	-0.325939	-1.03322	-1.32366	-1.03859	0.982882	1.4372	1.51305	0.495794	0.0517576
Tmem107	2.98711	2.18314	2.51495	0.905933	0.678349	1.46885	3.03148	3.55202	3.15763	2.61752	3.95467		0.498924	-0.260962	0.0526542	-1.46814	-1.68324	-0.936085	0.540862	1.03286	0.660094	0.1496	1.41343
Nhsl2	3.57326	3.07655	4.46029	1.17895	1.5072	1.77627	5.45846	5.41608	4.36745	3.06981	4.30332		0.0677445	-0.263267	0.658868	-1.52784	-1.30909	-1.12978	1.32406	1.29581	0.596999	-0.267758	0.554262
4930417O13Rik	1.99116	2.82013	2.07233	0.777152	1.11955	0.893999	2.21956	1.84241	1.67814	1.51016	1.73405		0.488553	1.86179	0.623017	-1.52253	-0.955324	-1.32896	0.866912	0.24214	-0.0299839	-0.308253	0.0626345
Emp1	24.1795	19.7887	25.8179	8.29958	9.50912	11.2622	20.6313	27.2785	22.0604	15.0171	16.3665		0.906753	0.240807	1.15525	-1.50173	-1.31828	-1.0524	0.368603	1.37677	0.585352	-0.482895	-0.278233
Rfx2	3.4551	3.08749	3.16006	1.39619	1.4647	1.22378	3.60524	3.557	3.60958	3.054	2.60497		0.75352	0.362274	0.43951	-1.43777	-1.36485	-1.62126	0.913313	0.861971	0.917932	0.326631	-0.151269
B230217O12Rik	4.71079	5.12566	5.16805	2.00218	1.84163	2.48271	3.38263	4.07266	3.17024	3.03917	2.15332		1.08062	1.4168	1.45114	-1.11417	-1.24427	-0.724797	0.00441173	0.563546	-0.167689	-0.273895	-0.991703
Fcna	10.7695	3.05348	6.06929	4.56692	2.17172	1.66618	5.83747	12.4491	5.23595	1.71657	2.26996		1.56818	-0.556056	0.274202	-0.139403	-0.798806	-0.937982	0.210381	2.03058	0.0447818	-0.92411	-0.771761
Tcp11	2.79523	2.60659	2.41602	1.22917	1.06506	1.01208	3.79092	3.34398	4.01855	3.56146	2.26139		0.221257	0.0478142	-0.127403	-1.21864	-1.36953	-1.41824	1.13673	0.725799	1.34603	0.925759	-0.269576
Npm3-ps1	0.71142	0.997422	0.642512	0.50485	0.36364	0.135509	0.553885	1.07556	0.775025	0.726336	0.602345		0.252193	1.32855	-0.00714103	-0.525229	-1.05667	-1.91524	-0.340687	1.62263	0.491569	0.308329	-0.158309
Arhgap23	0.655582	0.754039	0.819434	0.329249	0.298139	0.343402	0.899058	0.826971	1.11088	0.511839	0.750974		-0.0304407	0.343496	0.591864	-1.26984	-1.388	-1.21609	0.894273	0.620489	1.69877	-0.576372	0.331855
Ralgds	8.70245	6.90225	6.70109	3.28243	3.18443	3.25429	5.22177	6.35753	6.34157	6.86467	5.35189		1.7019	0.697766	0.585561	-1.32134	-1.376	-1.33704	-0.239592	0.393926	0.385023	0.676804	-0.167012
4931431B13Rik	3.94815	1.44974	2.07529	1.46758	0.880909	0.984806	2.86245	1.15191	1.03983	0.575847	0.955091		2.33867	-0.129738	0.4883	-0.112112	-0.691738	-0.589088	1.26601	-0.423991	-0.534725	-0.993136	-0.618446
Dyrk3	1.13715	0.715807	1.04602	0.290602	0.786531	0.226915	0.79868	1.63517	1.32276	1.35449	1.07742		0.442205	-0.525872	0.232825	-1.50282	-0.363376	-1.64915	-0.335463	1.58645	0.868662	0.941565	0.30497
Cpne7	4.48084	3.54381	4.10908	1.72645	2.02413	1.70919	4.72304	5.89303	5.44373	2.53373	2.85997		0.625172	-0.003973	0.375563	-1.22419	-1.02432	-1.23578	0.787791	1.57335	1.27168	-0.682166	-0.46312
Sept5	0.730438	0.492529	0.558934	0.205302	0.389283	0.216409	0.400432	0.621549	0.12122	0.292877	0.222961		1.7587	0.54203	0.881625	-0.926847	0.0140305	-0.870046	0.0710464	1.20184	-1.35684	-0.478989	-0.836539
1700120K04Rik	1.34268	1.64342	1.81146	0.582277	0.978624	0.625169	1.27767	1.3058	1.78778	1.37084	0.378941		0.307842	0.919551	1.26135	-1.23883	-0.432652	-1.15158	0.175611	0.232828	1.21318	0.36512	-1.65241
Gm17745	1.94222	1.54045	2.57267	1.44029	0.509615	0.813887	1.25675	1.15599	1.36066	1.03113	1.24977		1.06991	0.34145	2.21301	0.159846	-1.5276	-0.975909	-0.172937	-0.355629	0.0154657	-0.582017	-0.185593
Fam131b	1.01345	0.753665	1.07253	0.436487	0.382195	0.482411	1.51889	1.30132	1.65126	0.887562	1.29527		0.0733439	-0.520547	0.208406	-1.24564	-1.36976	-1.14066	1.22882	0.73144	1.53143	-0.214447	0.717609
H2-Aa	9.23808	2.57633	5.29229	3.70832	1.9177	2.26638	10.1817	9.62119	7.27608	5.25314	11.089		0.883412	-1.06654	-0.271554	-0.735196	-1.25933	-1.15726	1.15962	0.995552	0.309118	-0.283014	1.42519
Tle2	0.608327	0.796859	1.02995	0.313947	0.270502	0.54036	1.109	0.894235	0.986414	0.528696	0.850649		-0.392827	0.265572	1.07958	-1.42087	-1.57259	-0.630183	1.35564	0.605632	0.927543	-0.670917	0.453419
Ccr3	1.23598	0.471997	0.61849	0.611042	0.29342	0.172645	1.09772	1.19722	0.607641	0.38698	0.237201		1.58072	-0.412257	-0.0301054	-0.0495348	-0.878104	-1.19317	1.22005	1.47961	-0.0584068	-0.634038	-1.02476
Jam3	0.343664	0.567863	0.663862	0.139721	0.295211	0.300027	0.57229	0.225602	0.343191	0.321631	0.169735		-0.0862727	1.22311	1.78376	-1.27735	-0.36925	-0.341124	1.24896	-0.775785	-0.0890352	-0.214951	-1.10206
Gas7	8.09881	6.37998	7.45815	3.13453	3.79467	3.37387	6.75945	7.19431	6.96503	8.15314	6.38464		1.053	0.122242	0.706076	-1.63518	-1.27771	-1.50558	0.327727	0.563206	0.439049	1.08242	0.124766
Lst1	5.96323	4.46692	7.89893	4.42216	2.01174	2.24901	7.26332	7.93363	7.47583	6.3318	6.66462		0.124224	-0.577359	1.03183	-0.598346	-1.72853	-1.61728	0.733804	1.0481	0.833444	0.297037	0.453088
Klra14-ps	4.37911	3.40515	4.4547	0.753998	2.49438	2.60865	3.75852	7.59082	3.56183	1.22729	1.96284		0.582707	0.0612916	0.623175	-1.35802	-0.426295	-0.36512	0.25047	2.30212	0.145171	-1.10464	-0.710858
Stmn1	22.5108	20.4369	19.2395	6.62985	9.19098	13.9888	29.2357	36.1485	30.9353	24.7322	76.0879		-0.200655	-0.31091	-0.374568	-1.04494	-0.908779	-0.653711	0.156862	0.524368	0.247218	-0.0825586	2.64767
Tsc22d1	2.36085	2.07374	2.97694	1.35659	1.25032	0.958308	2.30008	1.61218	1.34951	1.40403	2.05591		0.938283	0.465735	1.95229	-0.714605	-0.889512	-1.37013	0.838263	-0.293935	-0.726258	-0.636524	0.436389
Cd55b	0.451569	1.04463	0.897227	0.308433	0.423166	0.425768	0.859405	0.988122	0.582762	0.922074	0.497035		-0.819135	1.3773	0.831382	-1.34925	-0.924327	-0.91469	0.691306	1.16802	-0.333255	0.923404	-0.650749
H2-Ab1	10.6367	2.98565	5.0239	3.69246	2.49193	2.89298	10.0243	10.0263	8.0137	5.37767	13.4656		1.01288	-0.998929	-0.462981	-0.813077	-1.12875	-1.0233	0.851849	0.852375	0.323172	-0.369959	1.75672
Rnase4	0.89513	0.86236	0.95801	0.270701	0.668575	0.384246	1.67715	1.56234	2.24404	2.22626	1.82495		-0.481277	-0.527821	-0.391966	-1.36817	-0.80306	-1.2069	0.62945	0.466382	1.43462	1.40937	0.839375
Bach2os	1.18022	2.02664	1.60931	0.677412	0.878283	0.800042	1.22216	1.0634	1.24792	0.992324	1.0046		0.0664602	2.27555	1.18635	-1.24583	-0.721571	-0.925774	0.17592	-0.238431	0.243152	-0.423933	-0.391894
Kcnj10	0.884573	0.524694	0.643797	0.493213	0.318821	0.193487	0.73999	0.663641	0.37634	0.198488	0.230446		1.72319	0.194661	0.700533	0.0609506	-0.679753	-1.21209	1.1091	0.784817	-0.435449	-1.19085	-1.05511
Qpct	2.64642	3.01242	2.62909	1.3772	1.46042	1.2322	3.66548	4.40107	4.77053	5.16364	4.13279		-0.348551	-0.087752	-0.3609	-1.25296	-1.19366	-1.35628	0.377597	0.901754	1.16502	1.44514	0.710587
Prss30	8.91573	7.17889	8.38516	4.29125	3.93395	4.02096	7.45679	7.10386	6.78124	8.08219	5.48386		1.33629	0.37067	1.04131	-1.23475	-1.43339	-1.38502	0.525172	0.328956	0.149592	0.87287	-0.571701
Rfx1	35.9437	34.6386	35.5115	17.7848	19.099	17.0385	30.1279	27.1321	29.9608	26.1046	25.9327		1.2645	1.07561	1.20195	-1.36364	-1.17344	-1.47165	0.422779	-0.0108035	0.398595	-0.159514	-0.184393
H2-Eb1	6.45576	1.71134	2.89618	2.66116	1.71462	1.26584	6.86587	5.68081	5.63272	3.34843	8.41817		0.904264	-1.03283	-0.54907	-0.645026	-1.03149	-1.21472	1.07171	0.587861	0.568227	-0.364422	1.70549
Apoe	33.6561	15.9635	24.569	19.6137	9.83306	8.59351	33.7931	28.9629	17.0009	9.77543	9.95854		1.48933	-0.339416	0.550068	0.0378772	-0.973072	-1.10119	1.50349	1.00423	-0.232188	-0.979029	-0.960102
Hist1h1c	3.49463	3.63576	2.89313	1.13663	1.36451	2.6441	4.89574	6.37245	4.47412	4.95542	3.61635		-0.0605669	0.0296768	-0.445188	-1.56836	-1.42264	-0.604427	0.835354	1.77962	0.565755	0.873516	0.0172654
Agbl3	0.877085	1.83977	1.54411	0.797388	0.678518	0.723606	1.7281	1.19102	1.28047	1.80681	0.925231		-0.757561	1.38503	0.726995	-0.934938	-1.1995	-1.09915	1.13649	-0.0588556	0.140228	1.31167	-0.650406
Crybb1	2.26795	1.499	2.50345	1.03271	0.779278	1.42558	0.935189	1.19105	0.905931	0.849019	1.08813		1.64973	0.316976	2.05791	-0.491206	-0.930459	0.189723	-0.660231	-0.216768	-0.710941	-0.809582	-0.395151
Notch3	1.08485	0.871093	1.32013	0.446374	0.587922	0.66411	1.08207	1.3042	1.43979	0.633865	1.17858		0.352362	-0.275129	1.04303	-1.52191	-1.10639	-0.882734	0.344201	0.996271	1.3943	-0.97152	0.627509
Rgcc	10.4	7.92538	8.17749	5.21292	4.87294	3.73128	13.2178	18.3929	13.3296	13.4544	11.037		0.0942149	-0.457517	-0.401307	-1.06228	-1.13808	-1.39262	0.72246	1.87628	0.747387	0.775212	0.236238
Klf4	0.961658	0.902407	0.904253	0.469169	0.517339	0.466416	1.44042	1.16905	0.870045	1.27273	0.829295		0.219416	0.0349995	0.0407451	-1.31343	-1.16351	-1.322	1.70954	0.864914	-0.0657257	1.18761	-0.192558
2810403D21Rik	0.947107	1.25198	0.418181	0.431265	0.414183	0.529181	0.841161	1.27111	0.756641	1.09589	0.855356		0.451462	1.39412	-1.18396	-1.14351	-1.19632	-0.840752	0.12388	1.45327	-0.137453	0.911494	0.16777
Thra	5.05265	6.71184	6.04208	2.94841	2.85483	3.5548	9.82807	9.43028	9.72607	9.63442	9.18506		-0.61207	-0.0359321	-0.2685	-1.34275	-1.37524	-1.13218	1.04615	0.908021	1.01073	0.978906	0.82287
Nr1d1	7.14898	8.07099	7.65153	4.12371	4.05291	3.86886	8.04309	7.9859	9.3024	7.44001	6.22011		0.227753	0.716073	0.493916	-1.37451	-1.41201	-1.50948	0.701297	0.671007	1.36826	0.38189	-0.2642
Ccr7	18.7073	22.4617	18.6938	11.0069	10.9193	9.60371	47.5837	38.2941	41.3077	54.4063	43.3141		-0.609789	-0.381924	-0.610609	-1.07715	-1.08247	-1.16231	1.1428	0.578991	0.761896	1.55689	0.88367
Lgals1	739.366	598.165	686.689	306.526	362.692	400.669	703.482	910.304	791.453	689.371	898.882		0.459135	-0.223011	0.204651	-1.63193	-1.36059	-1.17712	0.285778	1.28494	0.710768	0.217608	1.22976
Vipr1	13.4891	13.8988	10.493	7.20603	7.07193	5.81955	15.7248	13.8892	15.2725	17.1682	12.8429		0.365063	0.471179	-0.410953	-1.26231	-1.29704	-1.62142	0.944129	0.468693	0.82698	1.31798	0.197692
Sepp1	31.7814	31.0283	31.324	17.1221	17.1654	15.8142	38.1422	39.4794	36.3889	36.1207	30.5949		0.255164	0.169355	0.203047	-1.41513	-1.41019	-1.56415	0.979917	1.13228	0.780145	0.749586	0.119973
Spry2	3.0351	2.27825	2.87588	1.38902	1.51019	1.4632	2.55586	3.12674	2.74825	1.97441	1.63737		1.19464	0.0633856	0.956655	-1.26573	-1.08462	-1.15486	0.478325	1.33161	0.765888	-0.39076	-0.894529
Cd74	28.2317	9.76003	17.0584	13.6924	6.98776	8.70837	31.1515	30.1501	22.8348	11.341	28.0284		0.994607	-0.975024	-0.1968	-0.555716	-1.27063	-1.08716	1.30594	1.19917	0.419136	-0.806446	0.972929
Frat2	11.9063	10.6922	12.5712	5.93508	6.91276	5.96553	8.64511	9.22063	8.58937	8.98484	7.16617		1.39496	0.853084	1.69172	-1.27012	-0.833763	-1.25653	-0.0605773	0.19629	-0.0854553	0.0910517	-0.720661
Bank1	0.781162	0.457721	0.917316	0.535175	0.327077	0.296005	0.996386	0.931043	0.643475	0.288472	0.337733		0.686949	-0.487394	1.18129	-0.206175	-0.961733	-1.07455	1.46838	1.23113	0.187038	-1.1019	-0.923043
Scarf1	0.528407	0.644451	0.749926	0.405109	0.371378	0.257016	0.538735	0.495539	0.452296	0.462417	0.415435		0.334934	1.20432	1.99453	-0.588802	-0.841511	-1.6983	0.41231	0.0886904	-0.235282	-0.159456	-0.51144
Myb	2.42355	2.61592	2.71132	1.55106	1.48173	1.1368	0.972409	0.702013	1.21737	0.85123	1.02527		1.24054	1.50383	1.6344	0.0464083	-0.0484804	-0.52057	-0.745564	-1.11564	-0.410298	-0.911416	-0.673216
Actn1	35.3103	39.2913	32.1069	17.7854	20.4998	19.4103	35.6698	33.4986	35.3979	36.7372	31.762		0.604217	1.1236	0.186285	-1.68217	-1.32804	-1.47018	0.651119	0.367853	0.615646	0.790377	0.141288
Ldhb	1.37944	1.48324	1.21806	0.607124	0.947969	0.674351	2.12615	1.31637	1.38629	1.45521	1.66838		0.190455	0.429095	-0.180563	-1.58513	-0.801512	-1.43057	1.90717	0.0454553	0.206204	0.364653	0.854739
Gm19589	1.67332	2.07371	1.54692	0.857189	1.11725	0.920332	3.52294	3.20386	2.69933	3.41681	2.00118		-0.426229	-0.020456	-0.554328	-1.25333	-0.989775	-1.18934	1.44826	1.12489	0.613575	1.3407	-0.0939611
Depdc1b	1.28288	1.50901	1.4161	0.572846	0.978055	0.751719	1.15869	1.2561	1.16252	1.19878	1.6569		0.335525	1.05003	0.75646	-1.90797	-0.627629	-1.34278	-0.0568774	0.250909	-0.0447758	0.0697948	1.51732
Scg5	0.840456	0.490147	0.600294	0.289438	0.509619	0.258966	1.88178	1.2549	0.957027	1.16093	0.711597		0.0547915	-0.673601	-0.444574	-1.09093	-0.633113	-1.15429	2.22	0.916539	0.297176	0.721149	-0.213143
C1qa	20.0459	6.40893	11.2545	11.4099	4.69626	4.58634	14.1968	15.7307	9.133	3.11698	4.19434		1.90625	-0.564562	0.313381	0.341537	-0.874871	-0.894787	0.846481	1.1244	-0.0710022	-1.16101	-0.965812
Vwa7	0.947764	1.0576	1.15487	0.540457	0.64593	0.554478	1.07756	0.969616	0.941731	1.08074	0.917089		0.223913	0.727162	1.17284	-1.6423	-1.15904	-1.57805	0.818616	0.324035	0.196271	0.833186	0.0833658
Ctla2a	128.423	128.302	111.092	66.0548	70.5832	66.3569	115.649	121.532	129.668	136.338	106.567		0.783937	0.779442	0.139995	-1.53338	-1.36513	-1.52216	0.309313	0.527899	0.830196	1.07802	-0.0281331
Cdc25b	63.84	62.925	62.1981	30.5199	36.2057	37.7128	39.4499	44.8981	42.8739	42.6336	34.9854		1.53882	1.46289	1.40258	-1.22597	-0.754178	-0.629125	-0.484986	-0.0329137	-0.200875	-0.220814	-0.855435
Ier3	88.9354	72.1254	77.6289	49.2935	48.1969	34.8046	61.9778	54.7101	50.462	63.2337	44.5613		1.89676	0.84149	1.18698	-0.591818	-0.660659	-1.50138	0.204459	-0.251783	-0.518464	0.2833	-0.88889
Arl5c	45.5071	44.423	40.3587	23.7474	25.2516	23.3491	37.0615	35.2969	39.2002	39.0411	29.3471		1.32536	1.19142	0.689245	-1.36319	-1.17734	-1.41241	0.281853	0.063825	0.546104	0.526446	-0.671313
Ret	2.3396	2.74635	1.70492	1.05317	1.43508	1.28692	1.3064	1.19728	1.2098	0.987615	0.810315		1.48733	2.17635	0.4122	-0.691844	-0.0449009	-0.295879	-0.262881	-0.447727	-0.426518	-0.802893	-1.10323
Vcam1	11.1476	3.5061	6.97411	6.1803	2.98259	2.86988	8.70927	9.38308	5.37152	1.98851	2.35962		1.76449	-0.660928	0.43982	0.187864	-0.82709	-0.862864	0.99056	1.20443	-0.068843	-1.14261	-1.02482
Ly86	1.53066	0.91333	1.3376	1.12016	0.717192	0.26726	1.69929	1.00481	0.999435	0.520917	0.539991		1.2725	-0.124237	0.83569	0.343724	-0.568007	-1.586	1.65403	0.08274	0.0705789	-1.01209	-0.968931
Rnf39	0.814425	0.762584	0.449497	0.476805	0.22896	0.426607	1.54997	1.39006	2.13961	1.663	0.999858		-0.287145	-0.371433	-0.880475	-0.836075	-1.23904	-0.917691	0.908763	0.648768	1.86745	1.09254	0.0143465
Lca5	1.81525	1.79678	1.53731	0.844736	1.12873	0.906961	1.5521	1.64729	1.5498	1.85078	1.4235		1.00839	0.956056	0.220811	-1.7417	-0.936959	-1.56537	0.262721	0.532455	0.256203	1.10907	-0.101686
Dapl1	2.05032	2.40917	1.20705	0.933614	1.66518	0.572792	2.99159	3.46956	4.78799	5.1635	3.12474		-0.352236	-0.113417	-0.91344	-1.09541	-0.60855	-1.33555	0.274189	0.592283	1.46971	1.71962	0.362802
Ddr1	3.40787	2.95365	3.14499	1.46171	2.03043	1.83833	3.2277	3.0334	2.85516	3.56859	2.94675		0.93431	0.269133	0.549338	-1.91572	-1.08286	-1.36418	0.670462	0.385922	0.124901	1.16967	0.259028
Ccdc173	0.463695	0.401342	0.731206	0.323179	0.43453	0.138794	0.598827	0.579804	0.641154	0.60868	0.308473		-0.0667948	-0.42183	1.4564	-0.866887	-0.232859	-1.91677	0.702641	0.594325	0.943649	0.758744	-0.950622
Tob1	51.7183	51.1088	51.2939	25.5878	31.9762	29.1022	41.212	40.6943	44.224	46.4008	38.8708		1.16626	1.09927	1.11961	-1.70598	-1.00377	-1.31968	0.0114206	-0.0454845	0.342497	0.581769	-0.245922
H2-Ob	4.12238	4.81226	3.87127	2.60156	2.46008	2.14861	5.83535	5.27771	6.44681	7.18221	5.00108		-0.241723	0.173935	-0.393018	-1.15803	-1.24327	-1.43093	0.790354	0.454372	1.15876	1.60185	0.287701
Ttyh2	1.042	1.25065	1.01287	0.546306	0.524668	0.798358	0.947149	0.735081	0.888844	0.49223	0.882245		0.88925	1.76086	0.767563	-1.18145	-1.27184	-0.128535	0.493021	-0.392868	0.249459	-1.40735	0.221893
Rasl12	1.18313	1.51797	1.51276	0.607273	0.939112	0.840153	1.80297	2.1458	2.51136	2.13392	2.02769		-0.619514	-0.077219	-0.085657	-1.55215	-1.01472	-1.17499	0.384357	0.939592	1.53164	0.920351	0.748305
Vcl	4.60973	4.94496	4.96619	2.47485	2.82012	2.93131	4.30031	4.65147	4.73172	4.27479	4.10749		0.594061	0.965724	0.989261	-1.77284	-1.39005	-1.26677	0.251013	0.640337	0.729309	0.222719	0.0372366
Nrp2	0.656697	0.93011	0.854342	0.404283	0.596754	0.384922	1.30191	1.70391	1.46297	1.29308	1.59824		-0.754391	-0.181959	-0.340591	-1.28286	-0.87989	-1.32339	0.596461	1.43811	0.933664	0.577974	1.21687
Arl4d	70.8404	62.4293	65.9219	40.9289	36.8938	35.5779	42.6113	54.9403	51.291	46.7707	35.0787		1.68847	1.0264	1.30132	-0.665958	-0.983573	-1.08715	-0.533531	0.436923	0.149675	-0.206132	-1.12644
Clybl	10.2907	8.70354	8.02149	4.85403	5.66724	4.90502	8.53934	8.83649	10.2503	7.967	7.22637		1.3269	0.497653	0.141299	-1.51362	-1.08874	-1.48698	0.411863	0.567116	1.30579	0.11283	-0.27413
Pld4	2.28076	0.879359	1.41615	1.08491	0.828207	0.716817	1.51922	1.72181	1.70822	0.378395	1.23106		1.8851	-0.681218	0.30178	-0.304803	-0.77489	-0.978873	0.490527	0.86152	0.836634	-1.59861	-0.0371657
D930028M14Rik	2.74551	2.86524	4.0674	1.62146	1.82806	2.11936	3.16259	3.66788	2.46229	3.24567	1.83519		0.0658418	0.215362	1.71663	-1.33788	-1.07988	-0.716101	0.586696	1.21771	-0.287846	0.690447	-1.07098
Ctxn1	2.82076	2.18056	2.94978	1.44861	1.53035	1.60716	3.20216	3.63845	3.28445	3.13252	3.01677		0.256659	-0.558684	0.420976	-1.49088	-1.38678	-1.28895	0.742401	1.29805	0.847204	0.653709	0.506293
Bach2	5.44264	5.18895	6.71498	3.37572	3.38496	3.24724	5.34165	5.08426	6.36692	5.4197	4.52458		0.44692	0.231051	1.52957	-1.31186	-1.30399	-1.42118	0.360986	0.141968	1.2334	0.4274	-0.334272
Timp2	1.9828	1.49961	1.92735	0.967358	1.17864	0.976609	2.09799	2.60325	1.86867	1.10283	1.9043		0.627771	-0.27369	0.524321	-1.26668	-0.872506	-1.24942	0.842675	1.78531	0.414845	-1.01394	0.481318
Map10	0.574729	0.616451	0.684492	0.368942	0.396848	0.316895	0.63325	0.608953	0.711031	0.972818	0.499417		-0.0304173	0.195444	0.563782	-1.14444	-0.993371	-1.42619	0.286385	0.154853	0.70745	2.12463	-0.438117
Ccpg1os	3.2175	3.54434	3.66258	2.06028	2.16712	1.7907	4.68822	3.08023	4.72691	5.33806	4.25655		-0.241915	0.035074	0.13528	-1.22263	-1.13209	-1.45109	1.00448	-0.358248	1.03727	1.55521	0.638655
Apbb1	1.32346	1.14689	1.55541	0.889847	0.664191	0.77025	1.98128	1.85575	2.03096	2.45475	1.87632		-0.307923	-0.608301	0.0866681	-1.04558	-1.42946	-1.24904	0.811153	0.597603	0.895668	1.61662	0.632597
Acoxl	1.5228	1.04843	1.13463	0.724364	0.535133	0.897372	1.90189	1.79938	2.0354	2.60418	2.3369		0.0279165	-0.664692	-0.538835	-1.13785	-1.41414	-0.885245	0.58141	0.43174	0.776343	1.60679	1.21655
Itgad	3.14756	1.62993	2.56868	1.91624	1.36135	1.00051	2.41915	3.19061	1.7235	0.563059	0.831381		1.44651	-0.245566	0.80109	0.0736544	-0.545018	-0.947336	0.634372	1.49451	-0.14124	-1.43507	-1.13591
Tbc1d4	3.0407	2.86489	2.86208	1.56398	1.66402	1.88497	3.96262	3.30104	3.16507	4.17136	3.59233		0.14133	-0.0574997	-0.0606776	-1.52874	-1.4156	-1.16572	1.18396	0.435756	0.281984	1.42003	0.765186
Rnf144a	8.53787	8.32976	7.26877	4.89801	5.0564	4.12554	9.10894	9.48939	8.88868	10.6286	7.73341		0.426738	0.327573	-0.177991	-1.30766	-1.23219	-1.67575	0.698854	0.88014	0.5939	1.42298	0.0434111
Nipal1	1.41578	1.47605	1.67442	0.986748	0.912126	0.768089	2.52604	1.53794	1.73621	1.87136	1.59471		-0.170413	-0.0483916	0.353223	-1.03902	-1.1901	-1.48171	2.07739	0.0769094	0.478322	0.751943	0.191844
Gpr34	0.597118	0.65778	0.757995	0.378715	0.391693	0.406612	1.27846	1.20208	1.04581	1.64602	2.07283		-0.630763	-0.521915	-0.342095	-1.02265	-0.999366	-0.972596	0.591799	0.454747	0.174344	1.25133	2.01717
Aldoc	0.592847	0.653059	0.654396	0.339092	0.344829	0.428332	0.622498	0.751519	0.961068	0.834865	0.709657		-0.17255	0.135626	0.142469	-1.47131	-1.44195	-1.01457	-0.020791	0.639562	1.71207	1.06614	0.425304
Smyd1	6.20134	4.93168	5.01146	2.80144	3.5113	3.15243	5.26865	6.46368	6.40134	5.51474	4.2239		1.03494	0.0538463	0.115494	-1.59224	-1.04372	-1.32102	0.314231	1.23766	1.18949	0.504391	-0.493073
Zfp467	1.63733	1.61833	1.23681	0.918532	0.959518	0.761403	1.30339	1.87339	2.2033	1.49181	1.77206		0.456913	0.414182	-0.44387	-1.15969	-1.06751	-1.51308	-0.294129	0.987821	1.7298	0.129634	0.759926
Lppr2	0.723106	0.648901	0.627006	0.342706	0.309773	0.522928	1.12392	0.994364	0.652025	0.991389	0.769672		0.0867049	-0.198239	-0.282315	-1.37402	-1.50048	-0.681971	1.62581	1.12832	-0.186243	1.1169	0.265517
Tmem51	1.57482	1.83488	1.53777	1.15247	0.936544	0.824911	1.67147	1.37841	1.56334	1.36048	1.38465		0.62195	1.46786	0.501435	-0.751854	-1.45421	-1.81732	0.93633	-0.0169247	0.584608	-0.0752467	0.00337252
Gstk1	2.36855	2.60915	2.61449	1.63137	1.89316	0.948752	4.83915	5.42674	3.72451	5.26316	6.13417		-0.589099	-0.452325	-0.449289	-1.00816	-0.859344	-1.39621	0.815365	1.14939	0.181725	1.0564	1.55155
B930059L03Rik	1.33094	0.556123	0.354621	0.58216	0.258047	0.480803	1.04813	0.763239	0.719198	0.702852	0.699443		2.14481	-0.413725	-1.07911	-0.327748	-1.39801	-0.662441	1.21094	0.270195	0.124766	0.0707901	0.0595332
Cd40lg	3.96482	3.99475	5.92432	2.87792	2.67331	2.68468	5.10713	5.88263	5.08105	5.18336	4.13477		-0.292188	-0.267495	1.32445	-1.18891	-1.35771	-1.34833	0.650246	1.29005	0.628729	0.713138	-0.151975
Abhd14a	11.8496	10.6811	10.7132	6.96188	6.88915	5.91934	12.0184	10.9571	10.9665	11.693	10.6894		0.861154	0.33424	0.348715	-1.34288	-1.37567	-1.81299	0.937272	0.458698	0.462936	0.790538	0.337983
Cpm	5.87742	6.55261	7.03582	4.07375	3.76046	3.74748	7.28994	5.8983	5.38981	5.93858	5.71416		0.247934	0.79382	1.18449	-1.21032	-1.46361	-1.4741	1.38994	0.264816	-0.146294	0.297382	0.11594
Nr4a3	3.62191	2.94238	3.19993	2.26788	2.17971	1.39348	3.50738	3.57659	3.63127	3.56262	3.59225		0.756283	-0.131784	0.204804	-1.01328	-1.1285	-2.15602	0.606605	0.697055	0.768515	0.678798	0.71752
Zbtb20	1.65836	2.37211	2.15607	1.18262	1.55395	0.974514	2.15762	2.24858	2.44436	2.15943	1.51846		-0.395971	1.02743	0.59659	-1.34472	-0.604192	-1.75974	0.599681	0.781079	1.17151	0.603291	-0.674968
Nrgn	1.11462	0.818562	0.410119	0.453162	0.522255	0.437888	0.618708	0.28455	0.470918	0.284497	0.471862		2.38783	1.16776	-0.51544	-0.338059	-0.0533246	-0.401003	0.344161	-1.03291	-0.264886	-1.03313	-0.260995
Tmod4	1.90208	1.55804	1.72274	0.809004	1.05118	1.27735	1.9492	1.32334	1.07898	1.39423	1.52786		1.34842	0.390805	0.849238	-1.6941	-1.02001	-0.39048	1.47958	-0.26247	-0.942632	-0.0651513	0.3068
Ctsh	1.5326	0.745988	1.49503	1.14766	0.400801	0.746788	1.59405	1.62222	0.887081	0.509449	0.573368		1.08417	-0.589948	1.00421	0.264916	-1.3246	-0.588246	1.21495	1.2749	-0.289665	-1.09337	-0.957329
Aff3	6.68177	7.77165	6.0922	4.33483	4.68772	3.49624	7.25288	5.8547	6.39084	8.06022	6.36829		0.414134	1.17701	0.00145466	-1.22865	-0.981634	-1.81563	0.813892	-0.164787	0.210493	1.379	0.194708
F2rl1	14.0654	16.1271	13.7109	8.0413	9.67206	9.04872	16.08	17.0275	15.5039	20.8124	15.9009		-0.0299505	0.504555	-0.121856	-1.59173	-1.16894	-1.33055	0.492344	0.737988	0.342987	1.71924	0.445911
Ift22	2.86141	2.12766	2.21097	1.53561	1.80997	1.04919	2.72285	2.3793	2.30795	2.04498	3.93688		0.783912	-0.191185	-0.0804723	-0.977973	-0.61337	-1.62439	0.599777	0.143225	0.0484066	-0.30106	2.21313
Galnt9	0.782382	0.574543	0.617015	0.327074	0.48783	0.39016	1.20535	0.684863	1.08742	0.874841	1.00901		0.178433	-0.542672	-0.395314	-1.40128	-0.843527	-1.1824	1.64594	-0.159913	1.23678	0.499224	0.964728
Tagln2	417.143	382.191	427.853	245.322	257.412	246.931	418.024	409.797	416.937	426.985	440.865		0.569795	0.130876	0.704288	-1.58789	-1.43607	-1.56769	0.580858	0.477545	0.567208	0.693388	0.86769
Ttc41	1.10341	1.38074	1.1538	0.637878	0.724182	0.861643	1.29942	0.877522	0.839229	1.30303	1.01135		0.343814	1.45335	0.545412	-1.51867	-1.17339	-0.62344	1.128	-0.559912	-0.713113	1.14245	-0.0244971
Axl	7.93663	4.54321	5.53716	3.75631	3.94622	3.32733	7.95488	8.15181	6.08319	4.44858	4.1437		1.36804	-0.490656	0.0537646	-0.921668	-0.817648	-1.15663	1.37803	1.4859	0.352844	-0.542488	-0.709481
Itgb5	1.79104	0.950169	1.4873	1.26675	0.754514	0.568067	1.65894	1.86968	0.908797	0.643535	0.695623		1.32683	-0.4	0.703065	0.250138	-0.801802	-1.18469	1.05555	1.48833	-0.484963	-1.02971	-0.922742
2610206C17Rik	0.869116	0.846935	0.811769	0.456637	0.469875	0.630353	0.731604	0.55591	0.986037	0.64844	0.962283		0.775299	0.656425	0.467961	-1.43529	-1.36434	-0.504295	0.0383358	-0.903255	1.40191	-0.407362	1.27461
Fry	3.61808	3.37163	3.64372	1.86128	2.25584	2.43632	3.47031	3.92805	3.91538	3.07093	3.30338		0.646063	0.290365	0.683069	-1.88951	-1.32004	-1.05956	0.432788	1.09344	1.07515	-0.143632	0.19186
Dbp	6.04837	5.18672	5.64336	3.85019	3.44046	3.12731	5.68118	6.48703	7.81235	6.48081	4.70631		0.511247	-0.0893588	0.228938	-1.02098	-1.30657	-1.52485	0.2553	0.817011	1.74081	0.812675	-0.424224
Cxx1a	0.708343	0.88434	0.364885	0.4147	0.398274	0.395776	1.1234	0.867997	1.0012	1.1089	1.23946		-0.195365	0.333242	-1.22694	-1.07732	-1.12666	-1.13416	1.05126	0.284156	0.684231	1.00771	1.39985
Acy1	18.0805	15.0108	17.1529	10.7149	9.6651	10.6826	17.4244	16.8792	16.7316	14.9935	15.3348		1.08772	0.0735405	0.781256	-1.34576	-1.69259	-1.35643	0.870955	0.69083	0.642065	0.0678248	0.180585
Ctla2b	39.0602	41.4351	36.5824	22.0468	25.9321	24.51	36.2925	38.0416	36.1903	40.6026	36.3328		0.705385	1.05548	0.340124	-1.80262	-1.22988	-1.43951	0.297388	0.55523	0.282323	0.932756	0.303329
Wfikkn2	48.3551	49.0904	46.1438	24.7058	33.5392	30.7139	33.076	33.951	26.7327	38.4035	28.3553		1.45692	1.5418	1.20167	-1.2729	-0.253268	-0.579391	-0.306735	-0.205734	-1.03894	0.308215	-0.851642
Plxdc1	0.886944	1.28888	1.0832	0.626053	0.58357	0.810564	1.00561	1.1232	0.869775	0.520195	0.575194		0.136164	1.70721	0.90327	-0.883579	-1.04963	-0.162382	0.599994	1.05962	0.069056	-1.29735	-1.08237
S100a4	723.124	555.417	631.114	341.419	399.709	443.259	556.457	706.012	583.612	511.094	688.315		1.30638	-0.0215555	0.577828	-1.71603	-1.25448	-0.909645	-0.0133206	1.17089	0.201698	-0.372514	1.03076
Kcnc1	1.84753	1.78534	1.81905	1.21233	1.1511	1.0318	5.10651	3.73479	3.97841	4.34878	3.94083		-0.584076	-0.625552	-0.60307	-1.0077	-1.04854	-1.1281	1.58939	0.67457	0.837044	1.08405	0.811981
Ndnf	0.654781	0.460137	0.486002	0.330467	0.349115	0.319329	0.827184	1.00789	0.967809	0.922082	0.850702		0.00905615	-0.706626	-0.611524	-1.18341	-1.11484	-1.22436	0.642961	1.3074	1.16002	0.99189	0.729434
Frat1	8.96098	9.17775	8.0846	5.32402	5.3688	5.7162	7.14915	5.71261	5.80347	6.2778	5.01068		1.56783	1.7117	0.986175	-0.846031	-0.816311	-0.58574	0.365314	-0.588123	-0.527819	-0.213004	-1.054
Gcat	3.13363	3.54296	2.63759	1.61771	2.41236	1.82532	3.49462	3.14874	4.13357	4.37097	3.59409		0.0575173	0.52133	-0.504547	-1.66018	-0.759756	-1.42493	0.466556	0.0746385	1.19055	1.45955	0.579266
Tgfbr3	1.06358	0.876335	0.983122	0.700296	0.607733	0.53447	0.822826	0.741715	1.092	0.750404	0.812656		1.39042	0.335304	0.937043	-0.656666	-1.17825	-1.59109	0.0337835	-0.423272	1.55056	-0.37431	-0.0235238
Gm14204	0.449563	0.907924	0.496245	0.438661	0.456394	0.274735	0.427793	0.459075	0.457951	0.583713	0.285477		-0.158599	2.57677	0.119986	-0.22366	-0.117834	-1.20193	-0.288517	-0.101834	-0.108542	0.641971	-1.13782
E230016M11Rik	1.10371	0.643674	0.895822	0.570148	0.486724	0.612146	0.710473	0.795574	0.867787	0.695997	0.577185		2.1219	-0.445953	0.961502	-0.856365	-1.32203	-0.621938	-0.0730904	0.401931	0.805014	-0.153893	-0.817085
Amt	1.0828	1.29219	1.19523	0.880451	0.76102	0.61445	1.28796	1.46112	1.33084	1.38188	1.52797		-0.277342	0.428426	0.101614	-0.959377	-1.36193	-1.85596	0.414168	0.99782	0.558699	0.730734	1.22314
Zpbp2	2.08946	1.98117	1.6798	1.57529	1.1891	0.869704	2.13295	2.04838	1.56757	1.54755	2.10208		0.924165	0.662119	-0.0671518	-0.320051	-1.25457	-2.02747	1.0294	0.824758	-0.338732	-0.387177	0.954704
Mrc1	2.56145	1.17659	2.00867	2.05544	0.973109	0.611285	2.46564	2.84792	1.36746	0.706798	0.619636		1.17452	-0.484922	0.512141	0.568184	-0.728749	-1.16231	1.05972	1.51779	-0.256207	-1.04786	-1.15231
Atp6v1g2	2.62681	3.93018	3.63528	1.91277	2.57181	1.97152	3.02191	2.88256	2.89123	3.12219	2.55601		-0.330709	1.798	1.31636	-1.4969	-0.420537	-1.40095	0.314581	0.0869904	0.101151	0.478362	-0.446342
Amz2	9.40033	8.46757	7.8097	6.07817	5.27429	4.91776	10.4674	9.9995	7.89124	9.03462	7.97406		0.793632	0.287513	-0.0694503	-1.00899	-1.44517	-1.63863	1.37263	1.11874	-0.0252064	0.595196	0.019732
Ephx1	2.76938	2.89817	2.06344	1.68889	1.68688	1.52317	2.7341	2.81788	2.39328	2.68608	1.87583		0.91851	1.16283	-0.420663	-1.13119	-1.135	-1.44556	0.851584	1.01051	0.205046	0.760489	-0.77656
Tns2	2.15648	1.4476	1.90928	1.2384	1.09462	1.16489	1.0474	1.04207	0.828272	0.917373	0.779789		2.09476	0.476722	1.53052	-0.000783116	-0.328965	-0.168572	-0.436747	-0.448912	-0.936913	-0.733537	-1.04758
Itsn1	1.21085	1.25248	1.38408	1.09791	0.818964	0.524283	1.51092	1.89965	1.25165	1.35162	1.10378		-0.0221851	0.0948069	0.46464	-0.339579	-1.1235	-1.95163	0.821097	1.91354	0.0924744	0.373418	-0.323082
Rara	51.932	49.8614	54.5617	32.084	34.9354	32.4924	45.5119	48.4604	48.6027	40.6464	43.5855		1.02265	0.759692	1.35662	-1.49799	-1.13587	-1.44612	0.207318	0.581769	0.599841	-0.410586	-0.0373291
Rhob	2.17504	2.12059	2.23532	1.53684	1.24168	1.38813	3.40195	3.1073	2.51197	2.32275	2.96344		-0.139781	-0.217333	-0.0539266	-1.04875	-1.46913	-1.26055	1.60767	1.18801	0.340097	0.070597	0.98311
Ap1m2	0.794295	0.61985	1.13254	0.450386	0.589242	0.587184	0.818912	0.984934	0.854226	0.709662	0.616456		0.264479	-0.6112	1.9624	-1.46188	-0.764846	-0.775177	0.388051	1.22145	0.56532	-0.160362	-0.628237
Tyrobp	13.9709	6.46383	10.6409	9.54245	5.62961	4.6836	13.2943	16.0192	11.7193	7.1319	8.28019		1.13787	-0.891404	0.237723	-0.0592048	-1.11691	-1.37263	0.954979	1.69156	0.529232	-0.710814	-0.400413
Cd302	1.36811	1.40993	1.94571	1.29197	1.03395	0.693519	1.25986	1.89887	1.08322	0.876736	0.747334		0.315577	0.416391	1.70797	0.13203	-0.489968	-1.31063	0.0546236	1.59506	-0.371195	-0.868958	-1.1809
Slc25a33	10.1877	9.05804	8.20897	5.51605	6.17577	5.85904	6.24239	5.15975	5.12749	6.01858	5.14474		2.05826	1.40855	0.920221	-0.628567	-0.24914	-0.431302	-0.210825	-0.833487	-0.852041	-0.339545	-0.84212
Mpeg1	4.2718	2.04949	3.12107	3.30829	1.54848	1.17972	3.66893	3.5676	2.3243	1.28717	2.53905		1.58034	-0.551212	0.476603	0.656177	-1.03176	-1.38546	1.00209	0.904897	-0.287626	-1.2824	-0.0816462
Efnb3	0.621493	0.832654	0.778734	0.508084	0.393515	0.527913	0.351642	0.382256	0.63483	0.49733	0.597315		0.414249	1.76821	1.42248	-0.31293	-1.04755	-0.185787	-1.31604	-1.11974	0.499766	-0.381885	0.259219
Prss12	12.6072	12.6822	12.0577	7.98876	8.34293	7.58501	27.318	25.625	25.0082	26.0868	19.1566		-0.520718	-0.511334	-0.589471	-1.09858	-1.05426	-1.14909	1.3199	1.10807	1.0309	1.16585	0.298743
Ift172	3.9458	4.71063	4.13024	2.48456	3.14206	2.56576	5.29916	4.68713	4.99899	5.77489	4.90427		-0.267686	0.427466	-0.100049	-1.5958	-0.998203	-1.522	0.962379	0.406107	0.689555	1.39477	0.603465
Eomes	28.0837	29.3478	25.4674	18.6637	20.6495	13.9593	31.667	24.9787	35.9718	33.3232	35.3705		0.14628	0.32411	-0.221774	-1.1789	-0.899542	-1.8407	0.650368	-0.290522	1.25595	0.883357	1.17137
Ar	2.59576	2.72382	2.79735	1.82703	1.846	1.54779	2.59698	2.48305	2.61031	2.68161	2.46707		0.504812	0.804025	0.975829	-1.29133	-1.24701	-1.94378	0.507662	0.241464	0.538808	0.705401	0.204126
Cd163	1.36541	0.688969	0.964469	0.927135	0.586096	0.432506	0.927055	1.2829	0.588362	0.27015	0.519296		1.69428	-0.255089	0.538848	0.431259	-0.551549	-0.994166	0.431028	1.4565	-0.545019	-1.46204	-0.744054
Birc5	1.43708	0.725341	0.643098	0.510308	0.574161	0.72582	1.11087	2.08675	0.828406	0.8298	4.56132		0.136427	-0.465347	-0.534883	-0.647156	-0.593169	-0.464942	-0.139383	0.685721	-0.378205	-0.377027	2.77796
Noxo1	1.2184	1.47913	1.31747	0.63082	0.792245	1.17223	1.49066	1.1535	1.19189	0.964693	0.92633		0.357768	1.3212	0.723847	-1.81343	-1.21694	0.187163	1.36381	0.117953	0.25981	-0.579717	-0.721474
Abcc3	1.3598	0.696714	0.814497	0.935979	0.533417	0.38651	1.07328	1.11639	0.680178	0.290577	0.276673		1.73271	-0.127563	0.202874	0.543689	-0.585688	-0.997831	0.928883	1.04983	-0.173954	-1.26697	-1.30598
Ssx2ip	1.55301	1.61721	1.39888	1.09991	0.806177	1.04887	1.8181	1.65218	2.08399	2.14017	1.91527		-0.0106129	0.137339	-0.365814	-1.05481	-1.73173	-1.17243	0.600301	0.21793	1.21306	1.34253	0.824235
Rpgr	3.08132	3.23792	3.0161	1.90341	2.34134	1.79792	3.90569	3.27807	4.02521	3.17363	2.84105		0.164026	0.382572	0.0730063	-1.47983	-0.868671	-1.62705	1.31449	0.438605	1.48129	0.292851	-0.171289
Anxa1	47.1786	43.551	45.7495	28.1759	27.0201	33.2321	52.8141	69.3568	61.1435	55.4081	52.5651		0.0188106	-0.252188	-0.0879497	-1.40078	-1.48712	-1.02306	0.439808	1.67562	1.06205	0.633592	0.421207
1500009L16Rik	4.34235	3.60167	5.46995	2.99086	2.48941	3.21118	1.26393	2.19103	1.41275	1.56473	1.16786		1.18526	0.650555	1.9993	0.209601	-0.152404	0.368654	-1.0371	-0.367809	-0.929662	-0.819945	-1.10645
C030034L19Rik	0.552178	0.646288	0.933321	0.420928	0.436596	0.524245	0.4105	0.694758	0.572626	0.369965	0.423689		0.0486884	0.615878	2.34579	-0.742339	-0.64791	-0.11966	-0.805188	0.908001	0.171926	-1.04949	-0.725699
N4bp2	6.43298	8.35659	6.80804	3.91977	4.86213	5.23427	6.31304	6.28742	5.56723	7.02565	6.14397		0.293272	1.92131	0.610702	-1.83376	-1.03621	-0.721247	0.191762	0.170079	-0.439449	0.794874	0.0486709
Clec12a	0.726811	0.386517	0.636292	0.611367	0.399263	0.13128	0.548523	0.614225	0.392745	0.179115	0.318298		1.42971	-0.32468	0.96304	0.834539	-0.258968	-1.64056	0.510545	0.849273	-0.292572	-1.39395	-0.676385
Fbxo27	1.68489	1.81883	1.95334	0.819666	1.22152	1.52157	1.43333	1.29305	1.20158	1.09728	0.983739		0.901061	1.27983	1.6602	-1.54568	-0.409289	0.439213	0.189682	-0.207012	-0.465677	-0.760623	-1.0817
Smim24	11.3145	8.55954	7.07231	3.72439	6.64276	7.28341	8.17226	8.23292	9.29884	7.93314	11.4265		1.47402	0.190373	-0.502587	-2.06252	-0.702732	-0.404227	0.0099241	0.038188	0.534843	-0.101492	1.52621
Cited2	75.8209	65.7516	66.9932	42.8069	47.6902	46.2603	51.5353	57.3854	58.534	55.5274	48.5474		1.94466	0.952866	1.07516	-1.30711	-0.826123	-0.966963	-0.447393	0.128823	0.241956	-0.0541839	-0.741691
Cd55	15.334	15.812	15.3394	10.329	10.9404	9.21872	20.2083	15.919	15.8014	18.0572	15.5648		0.168314	0.312222	0.16994	-1.3385	-1.15443	-1.67276	1.63578	0.344435	0.30903	0.988164	0.237799
Plbd1	2.54308	0.755439	1.35627	1.36617	1.17818	0.508893	1.71299	2.75112	2.02815	0.816847	1.83867		1.3981	-1.07466	-0.243558	-0.229864	-0.489902	-1.4157	0.249876	1.68588	0.685823	-0.989718	0.423724
Plcl1	0.621153	0.754432	0.747186	0.567239	0.417907	0.408796	0.477406	0.320633	0.322995	0.243914	0.262959		0.839202	1.56804	1.52842	0.544372	-0.272255	-0.322079	0.0531173	-0.804201	-0.791284	-1.22374	-1.11959
Dyrk1b	7.00005	6.75602	7.20336	4.6083	4.53441	4.63619	5.46756	5.2833	6.03107	5.42985	5.66651		1.3664	1.1114	1.57885	-1.13285	-1.21006	-1.1037	-0.234967	-0.427508	0.353871	-0.274371	-0.0270746
Itga2b	1.34536	0.947807	1.08789	0.778482	0.806287	0.639162	1.20578	1.12279	0.98059	0.990246	0.728487		1.75467	-0.0871862	0.561817	-0.871668	-0.742847	-1.51714	1.108	0.723509	0.0646972	0.109433	-1.10329
Mxd4	44.9215	43.7135	43.2304	27.5849	28.4367	30.7581	38.7481	42.4517	50.5896	36.6484	39.9666		0.831942	0.667158	0.601259	-1.53295	-1.41676	-1.10009	-0.0101737	0.495036	1.60513	-0.296595	0.156042
Ccdc181	4.48368	4.60988	4.85027	2.91664	2.82912	3.44463	5.06299	4.76169	4.43617	5.46271	4.30241		0.228216	0.374867	0.654214	-1.59277	-1.69447	-0.979217	0.901406	0.551279	0.173007	1.3659	0.0175703
Sgms1	19.2012	20.6812	20.5005	13.7773	14.2541	11.7783	22.8651	22.1459	21.6471	24.3681	21.7164		-0.0375611	0.317546	0.274189	-1.33896	-1.22455	-1.81859	0.841545	0.668982	0.549302	1.20217	0.565929
Slc30a1	7.52706	8.03673	8.04207	4.69343	5.89373	4.9759	8.13928	9.10705	9.19255	9.3287	8.39226		-0.0291977	0.279017	0.282247	-1.74279	-1.01693	-1.57197	0.341033	0.926277	0.977982	1.06032	0.494019
Itgb3	11.2129	12.392	12.0668	6.49735	7.77024	9.30444	13.208	13.4988	10.5118	14.6898	13.8489		-0.057699	0.393358	0.268955	-1.8616	-1.37467	-0.787767	0.705513	0.816756	-0.3259	1.27237	0.950685
Tgfbi	1.02215	0.608032	0.789803	0.977418	0.325673	0.299833	0.758671	1.41357	0.88569	0.229588	0.380792		0.873216	-0.246513	0.244976	0.752266	-1.00998	-1.07985	0.160798	1.93157	0.504244	-1.26978	-0.860945
Nedd4l	1.15609	1.27402	1.12933	0.762662	0.976605	0.619124	2.15269	2.06352	1.96233	2.39401	2.32429		-0.566287	-0.387014	-0.606967	-1.16436	-0.839134	-1.38257	0.948711	0.813158	0.659332	1.31556	1.20957
Epha3	1.35352	1.34339	0.739638	0.810726	0.778614	0.687933	0.777888	0.516111	0.765904	0.752521	0.658099		1.94669	1.90866	-0.357755	-0.0908981	-0.211443	-0.55185	-0.214168	-1.19685	-0.259155	-0.309393	-0.663843
1190002F15Rik	5.6194	7.07456	6.49828	3.65542	3.76139	5.32636	7.0024	10.5397	5.91998	6.83003	10.1954		-0.437192	0.222407	-0.0388109	-1.32743	-1.27939	-0.570022	0.189698	1.79309	-0.300944	0.111566	1.63703
Prkab2	3.59032	3.68039	4.44477	2.0679	2.88552	2.83405	4.98234	4.84474	5.11375	4.74746	3.77871		-0.312427	-0.223387	0.532258	-1.81745	-1.00917	-1.06005	1.06368	0.927657	1.19359	0.831488	-0.12619
Mir3061	214.911	189.394	142.336	125.82	161.115	45.0293	81.8016	75.2428	0	0	72.7843		1.58153	1.22798	0.575964	0.347126	0.836157	-0.772271	-0.262772	-0.353647	-1.39618	-1.39618	-0.387711
Gldc	0.508445	0.280047	0.810681	0.606363	0.582346	0.710214	0.215033	0.210153	0.0911335	0.129776	0.131539		0.460473	-0.417839	1.62273	0.83702	0.744662	1.23638	-0.667853	-0.686619	-1.14431	-0.995712	-0.988932
Trib1	1.62765	1.2099	1.76744	2.10466	1.43847	1.82993	0.629606	0.486464	0.46353	0.351269	0.537794		0.760028	0.120072	0.974174	1.49077	0.470221	1.0699	-0.768887	-0.988168	-1.0233	-1.19527	-0.909535
Plxnd1	0.663987	0.507019	0.732935	0.500639	0.339395	0.513803	0.208218	0.224545	0.271257	0.146367	0.178877		1.34636	0.575782	1.68483	0.544462	-0.247107	0.609085	-0.891072	-0.81092	-0.581605	-1.19471	-1.03511
Mir680-2	73.0495	181.058	100.794	160.376	119.796	76.5286	69.5122	15.9847	50.503	37.2906	61.8496		-0.257411	1.87829	0.291195	1.46934	0.66693	-0.188617	-0.327355	-1.38578	-0.703233	-0.964488	-0.478871
Prr5	2.3567	1.77628	1.67723	1.84569	1.88882	2.76131	0.590151	1.05852	0.657441	0.284934	0.446332		1.15785	0.459152	0.339917	0.542706	0.594625	1.64491	-0.968688	-0.404874	-0.887685	-1.3361	-1.14181
Cd163l1	1.64956	1.67999	1.18527	2.04991	1.93955	2.6574	0.636758	0.653807	0.573801	1.12806	1.22536		0.378709	0.424544	-0.320623	0.981732	0.815504	1.89676	-1.14681	-1.12113	-1.24164	-0.406795	-0.260238
Art2a-ps	6.91633	5.02637	12.6182	15.8405	11.6574	7.84955	6.26149	2.10199	2.47936	3.08934	4.71727		-0.0502143	-0.471466	1.22067	1.93889	1.00652	0.15779	-0.196171	-1.12328	-1.03917	-0.90321	-0.540362
Dhrs3	1.45772	0.729132	3.25505	1.80913	0.538291	1.29666	0.99333	0.792087	0.653762	0.856186	1.03694		0.307672	-0.634695	2.63237	0.762191	-0.881532	0.0993546	-0.292977	-0.553268	-0.73218	-0.470362	-0.236571
Lmtk3	2.97801	2.63187	2.66255	2.21411	2.39881	2.16009	1.44298	1.03127	1.23607	1.44796	1.12866		1.48674	0.991297	1.03521	0.393338	0.657708	0.316017	-0.710416	-1.29972	-1.00658	-0.703288	-1.16032
Mir142	4475.2	6446.67	7979.83	6382.07	4838.91	3245.77	3603.34	3013.11	1903.97	4217.57	1457.33		0.0757237	1.06293	1.83066	1.03059	0.257851	-0.539912	-0.360859	-0.656416	-1.21182	-0.0532842	-1.43547
Gm5108	0.447561	0.986052	0.658713	0.291139	0.279607	0.156292	0.141963	0.391741	0.412564	0	0.378941		0.26384	2.27108	1.05092	-0.319227	-0.362213	-0.821872	-0.875284	0.0557699	0.133388	-1.40446	0.00805756
Id3	3.24115	4.76053	4.6212	4.48029	3.41695	2.8296	1.92763	1.83217	1.9918	2.13713	1.82948		0.199846	1.49208	1.37358	1.25373	0.349364	-0.150177	-0.917303	-0.998492	-0.862726	-0.739123	-1.00078
1010001N08Rik	0.86638	0.477195	0.597714	0.211343	0.405943	0.340366	0.30916	0.379162	0.199658	0.884545	0.458467		1.72089	0.0466227	0.565095	-1.09707	-0.259903	-0.542015	-0.676263	-0.375115	-1.14734	1.79904	-0.0339451
Ltk	1.27447	1.20759	1.12755	1.26551	1.1933	1.07013	0.568943	0.69782	0.436355	0.432422	0.611736		1.08367	0.89079	0.659958	1.05783	0.849578	0.494362	-0.951035	-0.57936	-1.33341	-1.34475	-0.827622
H2afy3	0.533314	1.20762	0.850333	0.751662	0.832949	0.465595	0.338326	0.518665	0.382364	0.544496	0.376289		-0.320517	2.22171	0.87469	0.502686	0.80915	-0.575827	-1.05565	-0.375745	-0.88962	-0.278359	-0.912523
Dusp14	1.63279	0.629531	1.57705	1.43388	1.18582	1.96714	0.388432	0.750304	0.752558	0.166703	0.241929		1.06851	-0.561433	0.977951	0.74535	0.34234	1.61171	-0.953134	-0.36522	-0.361558	-1.31337	-1.19115
Coprs	0.42287	0.465827	0.653492	0.825231	0.475527	0.354408	0.241436	0.444155	0.0779607	0.518083	0.50125		-0.152853	0.0669031	1.02694	1.90551	0.116526	-0.503085	-1.08102	-0.0439648	-1.91731	0.33423	0.248117
Npdc1	1.39841	0.941396	1.15771	0.758055	1.01924	0.651116	0.628383	0.509999	0.608723	0.713865	0.559114		2.07961	0.455354	1.22415	-0.19625	0.732016	-0.576318	-0.657112	-1.07786	-0.726985	-0.353304	-0.903298
Zbtb32	5.79482	4.46844	4.97509	5.08887	6.09405	7.65596	2.23632	3.38139	2.2257	1.67629	2.34415		0.832739	0.15024	0.41094	0.469487	0.98671	1.7904	-0.998315	-0.40911	-1.00378	-1.28648	-0.94283
Pik3c2b	0.811839	0.778914	0.7516	0.8752	0.552176	0.706467	0.380033	0.458442	0.374178	0.334218	0.42129		1.11741	0.954613	0.819557	1.4307	-0.166506	0.596394	-1.01768	-0.629979	-1.04663	-1.24421	-0.813679
Mal	1.02182	0.779214	0.75912	0.594343	0.810171	0.638123	0.620087	0.464356	0.272403	0.240763	0.44918		1.76548	0.739114	0.654104	-0.0430009	0.87008	0.142215	0.0659115	-0.592924	-1.405	-1.53886	-0.657127
Adap1	8.34101	6.49782	7.40131	10.432	7.73001	7.77271	3.94663	3.85203	4.03555	3.41106	3.96028		0.929211	0.156158	0.535091	1.80619	0.672951	0.69086	-0.913837	-0.953513	-0.876543	-1.13846	-0.908112
Popdc2	4.77832	4.32455	5.40268	3.76394	3.36828	3.61429	2.59555	2.67751	2.46735	1.7698	2.0936		1.23707	0.843915	1.77804	0.358187	0.0153759	0.228526	-0.654139	-0.583126	-0.765215	-1.36959	-1.08904
Cables1	1.81828	0.855449	0.911915	1.3056	1.2756	1.12562	0.598748	0.535088	0.807223	0.843453	0.923719		2.24528	-0.396837	-0.241888	0.838426	0.756103	0.344542	-1.10125	-1.27594	-0.529174	-0.429755	-0.209497
Galr3	4.24625	4.61942	3.96816	2.56836	3.96602	2.79888	3.06645	2.18806	1.77393	2.28732	2.47677		1.21246	1.60284	0.921544	-0.542805	0.919305	-0.301655	-0.0217468	-0.940642	-1.37387	-0.836805	-0.638619
Nccrp1	16.1721	12.6049	12.8833	10.9789	13.4035	13.0264	10.0173	5.87568	7.10215	9.93005	10.4955		1.71379	0.500004	0.594733	-0.0532628	0.771737	0.643424	-0.380459	-1.7897	-1.37238	-0.410147	-0.217746
5430431A17Rik	0.427878	1.13123	1.41693	1.50301	0.882124	0.806862	0.570022	0.449415	0.631072	0.52422	0.652097		-1.03139	0.82947	1.58535	1.81309	0.170409	-0.0287127	-0.655322	-0.974413	-0.493801	-0.7765	-0.438175
Nr4a2	0.764865	0.667623	0.799137	0.891861	0.720661	0.539099	0.545735	0.360796	0.331197	0.208779	0.472902		0.886617	0.437331	1.04496	1.47338	0.682382	-0.156488	-0.125827	-0.980299	-1.11706	-1.68266	-0.462337
Slc43a1	1.61885	1.68542	1.22775	1.44348	1.86561	0.959493	0.982835	0.666721	0.897998	0.964811	1.07076		1.05114	1.22514	0.0288759	0.592753	1.69612	-0.672297	-0.611285	-1.43755	-0.833033	-0.658396	-0.381466
Fads6	0.537519	1.18425	0.431516	0.762887	0.274751	0.409541	0.418492	0.299396	0.495488	0.44901	0.579227		0.0252347	2.56687	-0.391355	0.910926	-1.00744	-0.477716	-0.442539	-0.910583	-0.139946	-0.322604	0.189146
AA792892	0.652266	0.386898	0.498459	0.489576	0.564221	0.367947	0.334213	0.351332	0.185004	0.40981	0.254889		1.80229	-0.160531	0.664641	0.598937	1.15106	-0.300704	-0.550221	-0.423598	-1.65386	0.00893979	-1.13695
Tmcc3	0.664982	0.742998	0.660624	0.58397	0.596445	0.487685	0.298313	0.482373	0.394058	0.320062	0.273473		1.0117	1.49142	0.984902	0.513551	0.590261	-0.0785112	-1.24297	-0.111175	-0.65423	-1.10924	-1.39571
Havcr2	3.01048	1.76869	2.34831	3.11373	2.82113	4.60463	0.840312	2.05531	1.18403	0.778646	0.883623		0.733655	-0.298809	0.183105	0.8195	0.576223	2.05908	-1.07069	-0.0605041	-0.784914	-1.12196	-1.03468
Abca3	6.55679	6.61505	6.96005	6.57475	6.20212	6.05122	4.73322	3.50149	3.33882	3.59776	3.03273		0.870857	0.908161	1.12907	0.882357	0.643759	0.547137	-0.296787	-1.08547	-1.18963	-1.02383	-1.38562
Palm	7.76196	6.46097	7.5244	4.82095	5.91637	7.69102	3.63758	4.8154	4.30914	2.26974	2.32627		1.25586	0.610479	1.13802	-0.20309	0.340318	1.22067	-0.790127	-0.205843	-0.456985	-1.46867	-1.44063
Epcam	1.63412	1.5301	1.65349	1.99312	1.76104	1.42662	1.01074	0.834347	1.00423	1.39032	0.853205		0.668667	0.403374	0.718068	1.58426	0.992364	0.139458	-0.921204	-1.37108	-0.937807	0.0468783	-1.32298
Kif23	2.15117	2.04105	1.94124	1.59341	1.60387	1.52983	1.06086	1.27816	1.31715	1.07409	2.11384		1.34013	1.06768	0.820735	-0.0398472	-0.0139677	-0.197153	-1.35745	-0.819822	-0.723355	-1.32472	1.24777
Trat1	3.89849	5.91946	6.04788	5.75733	4.83813	5.29837	2.30603	4.05783	3.10802	2.90449	3.65761		-0.341936	1.20615	1.30452	1.08195	0.377837	0.730385	-1.56178	-0.21988	-0.947444	-1.10335	-0.526453
Mfhas1	6.44839	5.63965	6.63205	6.6977	6.21086	6.82382	3.40551	3.9459	3.83251	2.68005	3.13364		0.861217	0.366358	0.973596	1.01377	0.715875	1.09094	-1.00069	-0.670028	-0.73941	-1.44459	-1.16704
Tacc2	1.77604	1.45982	1.56876	1.17329	1.36987	1.10206	1.10502	0.86097	0.944516	0.906639	0.86754		1.87846	0.857817	1.20944	-0.0669984	0.567491	-0.296903	-0.287349	-1.07505	-0.805398	-0.927652	-1.05385
Bag2	1.69528	1.90208	1.42081	1.89924	1.97111	1.31557	0.836469	1.1541	1.07075	1.50646	1.2493		0.63651	1.1877	-0.0950458	1.18013	1.37169	-0.375546	-1.65251	-0.805919	-1.02807	0.133241	-0.552178
Echdc2	2.70534	1.93954	1.72089	1.61073	1.51332	1.54003	1.52718	1.20404	1.17181	1.44744	1.08705		2.50288	0.787549	0.297791	0.0510416	-0.167149	-0.107321	-0.136104	-0.859911	-0.932103	-0.314715	-1.12196
Pla2g4b	2.33355	3.09883	3.97619	3.45311	2.65802	2.34456	2.70893	1.11512	1.94699	3.17024	3.11091		-0.495118	0.486175	1.61119	0.940457	-0.0790611	-0.481001	-0.0137809	-2.05747	-0.990792	0.577742	0.501665
Tssk4	1.91403	2.1975	1.77187	1.88626	1.46338	1.32433	1.22683	1.09215	1.3117	1.66671	1.60641		0.965431	1.80324	0.545271	0.883356	-0.366485	-0.777453	-1.06562	-1.46367	-0.814782	0.234466	0.0562467
Fam227a	0.365391	0.503136	0.694628	0.722964	0.475567	0.457225	0.299406	0.328703	0.336819	0.393777	0.21484		-0.443252	0.425414	1.63303	1.81172	0.251555	0.135884	-0.859376	-0.674619	-0.623437	-0.264241	-1.39268
Lincpint	1.82681	2.42201	2.17026	1.80105	1.89086	0.987807	0.857194	1.94801	1.15844	2.08207	1.2974		0.290304	1.44014	0.953796	0.240539	0.414038	-1.33052	-1.58285	0.524443	-1.00088	0.783427	-0.732435
Ncaph	1.76712	2.10325	1.50219	1.54589	1.77017	2.36197	1.12103	1.08448	1.14213	0.953927	2.54523		0.259644	0.882653	-0.231398	-0.150401	0.265297	1.36218	-0.937869	-1.00561	-0.898761	-1.24759	1.70185
Grb7	1.70662	2.13404	1.88384	1.75525	1.77218	1.57046	1.20701	1.11024	1.25429	0.965388	1.42544		0.497761	1.67493	0.985846	0.631694	0.678321	0.122759	-0.878227	-1.14474	-0.748012	-1.54368	-0.276644
Ctla4	5.29626	4.35012	5.90899	5.8536	4.22148	6.74184	4.84331	2.91877	1.98838	2.45698	2.47667		0.628828	0.0446213	1.00717	0.972965	-0.0348092	1.52142	0.349148	-0.839185	-1.41367	-1.12432	-1.11217
Vax2	1.47451	0.595575	1.68187	0.479585	0.967236	1.85368	0.608014	0.903426	0.860833	0.401447	0.957136		1.01037	-0.786545	1.43431	-1.02368	-0.0267106	1.78556	-0.761114	-0.157166	-0.244244	-1.18343	-0.0473594
Sox12	0.669408	0.724241	0.527799	0.513209	0.548891	0.588582	0.295747	0.418513	0.506873	0.427152	0.354234		1.26746	1.69482	0.163772	0.0500582	0.328161	0.637509	-1.64482	-0.687995	0.000675945	-0.620663	-1.18898
Spc25	1.34309	1.24046	1.42962	1.25378	1.23146	1.22587	0.952167	0.720726	0.878758	0.929184	1.75305		0.567004	0.214488	0.86422	0.26024	0.183574	0.164374	-0.775749	-1.57071	-1.0279	-0.854692	1.97515
Pank1	1.76673	1.92124	1.8341	1.61721	1.77387	1.43925	1.1875	1.13524	1.20205	1.32352	1.00489		0.909856	1.38885	1.11871	0.446331	0.93199	-0.105361	-0.885807	-1.04782	-0.840701	-0.464134	-1.45191
Crb3	2.39065	2.45794	1.70062	2.0735	1.64288	1.94795	1.56715	1.34849	1.27326	1.51871	1.39439		1.55272	1.71734	-0.135381	0.776841	-0.276637	0.469693	-0.461904	-0.996839	-1.18088	-0.580409	-0.884548
Card10	0.872003	0.652705	0.999571	1.13448	0.607629	0.585598	0.595738	0.499045	0.525572	0.616352	0.615256		0.829853	-0.230395	1.44661	2.09886	-0.448325	-0.554839	-0.505815	-0.9733	-0.845049	-0.406152	-0.411451
Xlr	1.35719	1.56398	1.12943	1.43991	0.807103	0.685462	0.418636	1.00242	1.18388	0.975036	1.27473		0.819437	1.4224	0.155323	1.06064	-0.784534	-1.13922	-1.91725	-0.215019	0.314091	-0.294867	0.578996
1700017B05Rik	9.38814	7.88004	10.2686	8.94138	7.61527	7.53887	5.7488	6.35479	5.76607	4.86891	6.50928		1.2053	0.31225	1.72668	0.940742	0.155461	0.11022	-0.949803	-0.590955	-0.939577	-1.47085	-0.499471
Itga3	3.45412	3.20691	2.88976	2.85796	2.95911	3.20915	1.77789	2.07275	2.3531	2.3401	2.02989		1.4376	0.9956	0.428556	0.371699	0.552549	0.999605	-1.5594	-1.03221	-0.530959	-0.554202	-1.10884
Banp	9.42927	10.3727	9.28267	9.13096	9.03727	7.63865	6.03908	5.61696	7.30947	5.1245	5.54499		0.932724	1.43699	0.854366	0.773277	0.7232	-0.024362	-0.879331	-1.10495	-0.200309	-1.36817	-1.14342
Mir142b	1935.9	1699.38	1469.13	1741.38	1544.85	1663.68	1467.97	1151.7	711.02	1266.19	678.685		1.32802	0.748785	0.184908	0.851642	0.370344	0.661356	0.182067	-0.592471	-1.67169	-0.312088	-1.75087
Gas2l1	1.03997	1.04539	0.960652	0.874197	0.950749	1.24449	0.617442	0.765587	0.617215	0.314821	0.736399		0.801493	0.822519	0.493805	0.158431	0.455389	1.59486	-0.837567	-0.262886	-0.838448	-2.01149	-0.376112
Sgol2a	0.574055	0.556049	0.524411	0.473217	0.528673	0.508075	0.461493	0.372512	0.25546	0.555776	0.729061		0.588143	0.437991	0.174163	-0.252743	0.209703	0.037937	-0.350509	-1.09252	-2.06861	0.435715	1.88073
Apoo	4.27689	4.4862	4.14096	3.50005	3.13873	3.25578	2.10325	3.94422	2.46477	3.26804	5.2887		0.708626	0.935918	0.561018	-0.134953	-0.527314	-0.400209	-1.65175	0.347376	-1.25917	-0.386895	1.80736
Kmt2d	71.6079	83.8961	85.1091	83.6229	83.1172	81.4851	52.1617	50.6797	55.9586	46.4028	54.8155		0.221106	0.990786	1.06676	0.973674	0.941999	0.839771	-0.996921	-1.08975	-0.759099	-1.35763	-0.830698
Cers6	2.26683	2.01862	2.63707	2.22511	2.17513	2.48856	1.93748	1.10492	1.52652	1.17797	1.48256		0.683042	0.204166	1.39735	0.602551	0.506124	1.11083	0.0476209	-1.55865	-0.745252	-1.41772	-0.830065
Il20rb	1.31222	1.39652	1.66943	1.3021	1.27137	1.58442	1.01587	0.876018	1.00459	0.953708	1.22402		0.292111	0.620781	1.68481	0.252655	0.132845	1.35337	-0.863302	-1.40856	-0.90728	-1.10566	-0.0517642
Lamc1	6.79077	5.46775	7.75932	7.05852	7.21341	10.257	3.81488	5.2456	4.2046	2.18575	3.90235		0.431187	-0.149926	0.856605	0.548791	0.616824	1.95367	-0.875919	-0.247501	-0.704741	-1.59148	-0.837499
Tox	5.59622	6.39615	6.11407	7.99509	8.26906	6.42301	3.61679	3.56085	4.87692	4.69955	4.68969		-0.0393128	0.470161	0.290505	1.48852	1.66301	0.487268	-1.30001	-1.33564	-0.497434	-0.6104	-0.61668
Swap70	10.2446	9.75829	8.43757	6.63406	6.9775	7.1504	5.60289	7.45315	5.9022	6.21364	5.87948		1.87882	1.56897	0.727477	-0.421625	-0.202803	-0.0926401	-1.07863	0.100256	-0.887928	-0.689495	-0.902404
Nxnl1	1.98453	2.35929	2.14722	1.87889	1.85971	1.72911	1.77625	1.30706	1.24975	1.34407	1.58045		0.671025	1.72946	1.13051	0.372667	0.318498	-0.0503545	0.0827825	-1.24235	-1.40421	-1.13782	-0.470213
Mdk	2.33106	2.2328	3.25939	2.84692	2.63433	2.09067	2.14352	1.42544	1.68606	2.30144	2.41113		0.0501222	-0.144123	1.8853	1.0699	0.649643	-0.425094	-0.320617	-1.74016	-1.22495	-0.00843218	0.208409
Tlr2	0.782203	0.420323	0.673893	0.428156	0.5721	0.459695	0.526474	0.417467	0.316553	0.486953	0.355367		2.08672	-0.537747	1.30122	-0.480939	0.562988	-0.252208	0.232094	-0.558459	-1.29032	-0.0545249	-1.00883
Pola1	5.19234	5.39482	5.50355	3.90538	4.19303	4.05912	3.70568	3.69261	3.41751	3.87551	4.77094		1.14707	1.41871	1.56457	-0.579471	-0.19357	-0.373219	-0.84738	-0.864915	-1.23398	-0.619543	0.581732
H60c	0.464533	0.554366	0.598231	0.434383	0.380901	0.486657	0.460457	0.288006	0.338999	0.474273	0.540803		0.0862753	1.05228	1.52398	-0.237939	-0.813051	0.324183	0.0424445	-1.81199	-1.26364	0.191013	0.906435
Tmem240	2.88635	1.9457	1.5217	1.76548	1.25148	1.26368	1.80373	1.35745	1.11191	1.67136	0.911872		2.4246	0.665187	-0.127871	0.3281	-0.633296	-0.610477	0.399644	-0.435087	-0.89435	0.152056	-1.26851
Epas1	9.9325	8.40904	9.42395	8.4742	7.02456	7.88393	6.13275	6.58693	5.98615	5.10549	4.51676		1.54861	0.677198	1.25772	0.714469	-0.114716	0.376838	-0.624825	-0.365037	-0.70868	-1.21241	-1.54916
Il11	0.86296	0.577162	0.510302	0.721742	0.924208	0.872327	0.439911	0.566496	0.312507	0.755189	0.600176		1.09791	-0.371114	-0.71478	0.372041	1.41273	1.14606	-1.0766	-0.425938	-1.73146	0.543961	-0.25282
Epb4.1l3	1.0534	0.406141	0.79941	1.28481	0.678658	0.331069	0.639021	0.749137	0.424823	0.134435	0.144932		1.2419	-0.54744	0.539747	1.88163	0.20593	-0.754976	0.0963537	0.400768	-0.495794	-1.29857	-1.26955
Mafb	1.84202	0.857136	1.80542	3.25382	1.29462	0.831788	1.70749	1.47329	0.892904	0.453948	0.349566		0.608895	-0.59044	0.564326	2.3281	-0.0576969	-0.621307	0.445073	0.159877	-0.546884	-1.08142	-1.20853
Prickle1	0.338825	0.344533	0.431548	0.546776	0.402998	0.518791	0.148808	0.148283	0.168178	0.0798298	0.143438		0.248863	0.2832	0.806645	1.49981	0.6349	1.33146	-0.894198	-0.897357	-0.777677	-1.30914	-0.926502
Clec4n	2.90949	0.889582	1.66253	3.86144	1.61668	1.41065	1.56868	2.25383	1.74983	0.644843	0.411525		1.18552	-0.836775	-0.0629151	2.13859	-0.108819	-0.315092	-0.156876	0.529083	0.024488	-1.0818	-1.3154
Pirb	0.480913	0.154515	0.265425	0.801638	0.356776	0.377863	0.400423	0.350778	0.332481	0.122749	0.118761		0.717604	-0.968875	-0.39581	2.37477	0.0761954	0.185151	0.301717	0.0452041	-0.0493353	-1.13301	-1.15361
Lgmn	5.39073	1.86824	3.3764	6.70798	4.17188	3.0141	3.83286	3.71109	2.20543	0.64932	1.5385		1.18536	-0.826319	0.0349859	1.93764	0.489282	-0.171922	0.295668	0.226126	-0.633751	-1.52244	-1.01463
Hebp1	3.00975	1.10516	1.95428	4.43394	1.60378	1.23651	2.24628	2.68602	1.6864	0.662772	0.499665		0.952283	-0.712685	0.029605	2.19729	-0.276798	-0.59786	0.284868	0.669283	-0.204572	-1.09941	-1.242
Lrrc25	1.08816	0.416938	0.783359	1.98505	0.753703	0.545209	0.810364	0.7868	0.610564	0.289819	0.240345		0.695296	-0.707559	0.0582613	2.5698	-0.00371982	-0.439473	0.114702	0.065453	-0.302881	-0.973238	-1.07664
Spic	2.95541	1.15523	1.789	4.74423	1.51877	0.799011	2.08655	3.21265	1.36216	0.389339	0.80719		0.823572	-0.571501	-0.0803524	2.20984	-0.289771	-0.847557	0.150238	1.02292	-0.411138	-1.16504	-0.841219
Esm1	5.43312	4.84084	4.90954	5.56124	5.96491	7.61708	2.76242	6.97007	3.5598	1.08765	2.20986		0.397947	0.104918	0.138908	0.461334	0.661049	1.47846	-0.923374	1.15835	-0.528873	-1.75196	-1.19675
Hmox1	36.9366	11.7762	19.2467	29.4945	11.8487	10.0022	19.6436	28.3289	15.8688	4.85501	5.3683		1.86515	-0.559119	0.160683	1.14808	-0.552134	-0.730049	0.198925	1.03578	-0.164787	-1.22599	-1.17654
Rgl1	0.878869	0.347928	0.560856	1.15234	0.411795	0.287727	0.69257	0.985608	0.506341	0.126182	0.279045		0.959195	-0.67011	-0.0166952	1.7984	-0.47412	-0.854849	0.387497	1.28675	-0.183986	-1.35058	-0.881492
Gm5779	0.143884	0.317002	0.158825	0.491384	0.337086	0.678317	0.47921	0.503756	0.265267	0.146901	0.182736		-1.07339	-0.10996	-0.99024	0.860503	0.00181019	1.90081	0.792753	0.929355	-0.397874	-1.0566	-0.857172
5031414D18Rik	0.351366	0.295987	0.456296	0.484017	0.426109	0.606283	0.334352	0.488451	0.247681	0.126612	0.209996		-0.104169	-0.495576	0.637455	0.833381	0.424099	1.69753	-0.22442	0.86472	-0.836993	-1.69268	-1.10334
Mt3	3.63409	2.66883	2.34001	2.21623	2.69603	3.80716	1.44088	3.0483	2.0937	0.927571	1.02564		1.33646	0.328376	-0.0150323	-0.144304	0.356783	1.51721	-0.954053	0.724682	-0.27227	-1.49014	-1.38772
Ptgs1	1.12096	0.460445	1.11152	1.52016	0.943626	0.796166	0.922042	1.33037	0.648004	0.310362	0.450417		0.642875	-1.07659	0.618301	1.68208	0.181235	-0.202636	0.125047	1.18802	-0.588335	-1.46729	-1.1027
C1qb	14.1045	5.78585	9.64111	15.7203	7.35527	5.74975	13.3654	14.9797	6.4736	2.34983	4.79679		1.06713	-0.713878	0.111528	1.41307	-0.377867	-0.721607	0.908894	1.25451	-0.566632	-1.44953	-0.925634
Mir155hg	3.91615	4.31397	4.69182	5.63859	5.41525	4.70306	3.77196	3.92935	3.08165	2.29169	1.6983		-0.0279059	0.298487	0.608496	1.38528	1.20204	0.617718	-0.146207	-0.0170759	-0.712576	-1.3607	-1.84755
Irf4	1.28727	1.51755	1.42094	1.59761	1.83062	1.94006	0.913329	1.50229	0.947208	0.380444	0.98474		-0.0321422	0.470161	0.259428	0.644793	1.15305	1.39177	-0.847809	0.436875	-0.77391	-2.01018	-0.692042
Cmklr1	4.65353	3.4597	6.51078	5.92345	4.48646	6.80116	3.77216	3.95581	2.94803	0.958042	3.51849		0.22568	-0.47975	1.32312	0.976072	0.126959	1.49471	-0.295118	-0.1866	-0.782094	-1.95797	-0.445011
Fcer1g	7.68649	4.78587	5.4105	12.935	5.32398	6.53542	8.90434	8.2879	5.03169	3.18456	3.30116		0.421327	-0.599845	-0.379942	2.26908	-0.410402	0.0160891	0.850074	0.633055	-0.513303	-1.16359	-1.12254
Gm10069	0.380929	0.736542	0.563022	0.844339	0.810896	0.61768	0.486661	0.345287	0.362153	0.291654	0.322488		-0.701271	1.04439	0.192603	1.57356	1.40939	0.460913	-0.182245	-0.876233	-0.79344	-1.13951	-0.988151
Mrgpre	0.455	0.501221	0.470856	0.568833	0.81279	0.47667	0.392377	0.584933	0.498063	0.18872	0.325046		-0.155682	0.138013	-0.0549304	0.567629	2.11777	-0.0179874	-0.553597	0.669931	0.117947	-1.84766	-0.981427
Slpi	7.45083	2.40428	5.73224	12.4107	6.13587	2.75959	5.94417	10.0129	4.44006	2.45885	3.44098		0.530021	-1.03762	-0.0038358	2.07074	0.121546	-0.92725	0.0619974	1.32589	-0.405234	-1.02067	-0.715585
Matk	3.91655	2.81715	3.16356	3.55067	3.70174	4.1669	3.4919	6.66805	4.56517	1.19427	1.98424		0.24838	-0.529422	-0.284345	-0.0104726	0.0964062	0.425497	-0.0520511	2.19501	0.707265	-1.67758	-1.11869
Il18	2.97951	2.10396	2.1926	3.87635	2.14778	1.92087	2.39904	2.07295	1.7606	0.935996	1.29369		1.05377	-0.0625667	0.0504503	2.19725	-0.00669566	-0.296008	0.313664	-0.102105	-0.500354	-1.55173	-1.09567
Cd5l	4.96654	1.82369	3.92895	3.0692	2.89592	2.22576	3.41325	3.88825	2.49257	0.957795	1.35497		1.78497	-0.828143	0.922266	0.207431	0.0633581	-0.493844	0.49349	0.888427	-0.272006	-1.54809	-1.21786
Slc11a1	1.87854	0.76938	1.59508	2.77298	1.44442	1.312	1.92508	1.87612	0.932424	0.491776	1.08074		0.645879	-1.07267	0.206683	2.03173	-0.0267513	-0.231924	0.717988	0.642129	-0.820043	-1.50279	-0.590241
Lrp1	1.30513	0.550046	0.99211	1.21636	0.52923	0.346331	0.976503	1.05796	0.520591	0.284781	0.311973		1.50061	-0.488716	0.675935	1.26674	-0.543557	-1.02542	0.634817	0.849422	-0.566317	-1.18758	-1.11594
Sirpa	2.88815	1.24172	1.81785	2.67674	1.22829	1.00203	3.35221	2.99247	1.59879	0.479249	0.926156		1.07351	-0.607455	-0.0192412	0.857664	-0.621167	-0.852173	1.5473	1.18002	-0.242896	-1.38592	-0.929638
Clec4a3	0.888073	0.34676	0.63703	1.02384	0.308609	0.219849	0.797506	1.13615	0.508616	0.0938839	0.355352		0.905826	-0.656143	0.181437	1.29758	-0.766229	-1.02235	0.644493	1.62166	-0.189105	-1.38582	-0.631351
Csf1r	7.15037	2.98982	5.20107	5.9553	2.65959	1.76087	6.81723	7.70564	4.17827	1.25188	1.77306		1.19734	-0.558375	0.374754	0.693033	-0.697729	-1.07698	1.05676	1.43166	-0.0568588	-1.29177	-1.07184
Rab3il1	0.83656	0.342287	0.606823	1.09614	0.425568	0.15024	0.591352	0.711302	0.506752	0.146417	0.344031		1.08751	-0.628989	0.289687	1.98898	-0.339772	-1.29593	0.23596	0.65252	-0.0578376	-1.3092	-0.622932
Fcgr3	1.62864	0.921284	1.55481	2.31929	0.824972	0.553363	1.50789	1.84931	0.77093	0.314581	0.782638		0.715607	-0.423681	0.596695	1.82799	-0.578804	-1.01627	0.521124	1.07103	-0.665846	-1.40085	-0.646988
Slc15a3	3.94498	3.3829	3.91133	6.20039	5.46779	4.97428	3.82138	3.47363	3.33164	2.19473	2.84011		-0.0115337	-0.492135	-0.0403059	1.91694	1.29053	0.868561	-0.117217	-0.414558	-0.535965	-1.50807	-0.956243
Ikzf2	0.400571	0.495665	0.605707	0.610381	0.452508	0.459889	0.349845	0.408246	0.379365	0.313731	0.148671		-0.151714	0.575266	1.41652	1.45225	0.245337	0.301763	-0.539508	-0.09304	-0.313831	-0.815594	-2.07745
Adam8	7.73397	6.41169	7.61273	9.20854	8.5805	11.0104	5.0606	6.374	5.28677	3.81115	4.94419		0.382648	-0.23308	0.326192	1.06929	0.77684	1.90834	-0.862223	-0.250631	-0.756906	-1.44404	-0.91643
C1qc	18.0882	7.27549	11.6909	14.2242	6.63522	5.36076	13.532	16.7696	8.88537	3.46265	4.63478		1.58411	-0.547002	0.323246	0.822543	-0.673195	-0.924382	0.686115	1.32422	-0.229705	-1.29849	-1.06747
Cd80	5.07111	4.35728	6.75454	5.311	5.79762	9.20856	3.69959	5.17841	5.11087	3.38259	3.03415		-0.0591397	-0.472463	0.915603	0.0797618	0.361525	2.33653	-0.853279	0.00298933	-0.0361178	-1.03683	-1.23858
Marcks	1.90518	0.769529	0.939344	2.0077	0.868869	0.625387	1.97004	1.83432	1.21763	0.5187	0.591462		1.15639	-0.717545	-0.437333	1.32556	-0.553624	-0.955394	1.26342	1.03947	0.0218667	-1.13144	-1.01137
Hfe	1.63255	0.770741	1.32397	1.30038	0.999099	0.279234	0.982827	1.57475	0.829229	0.34016	0.479557		1.43923	-0.393241	0.783095	0.732935	0.0923189	-1.43834	0.0577196	1.31633	-0.268877	-1.30879	-1.01239
Gnmt	0.916223	0.471005	0.404545	0.953606	0.858595	0.703897	0.232495	0.48117	0.450442	0.249449	0.568882		1.3568	-0.397301	-0.659144	1.50408	1.12975	0.520261	-1.337	-0.357252	-0.478316	-1.2702	-0.0116788
Klrb1c	50.5361	46.6398	57.9919	58.7712	59.8199	86.4192	46.072	60.5935	44.5663	34.9785	31.708		-0.135422	-0.396876	0.364885	0.417179	0.48755	2.27245	-0.434977	0.539461	-0.536014	-1.17939	-1.39885
Spo11	2.45949	2.94872	2.11649	3.74719	2.98376	3.82734	2.20299	1.87917	1.90085	1.79672	1.65441		-0.0545655	0.580016	-0.499471	1.61571	0.625466	1.71967	-0.387272	-0.8073	-0.779178	-0.914246	-1.09884
Rnf216	10.7328	10.7179	11.3556	11.5105	10.6208	11.6341	7.04878	8.41026	8.30099	5.02244	6.06971		0.639767	0.633464	0.903211	0.968734	0.59239	1.02102	-0.918577	-0.34267	-0.388891	-1.77572	-1.33272
4933404K08Rik	0.493422	0.452955	0.771599	0.682064	0.84771	0.947691	0.352147	0.503862	0.379032	0.293865	0.522214		-0.347367	-0.536184	0.950593	0.532827	1.30572	1.77223	-1.00655	-0.298654	-0.881105	-1.27849	-0.213025
Pdcd1	8.29258	7.61786	9.31539	11.065	11.4505	15.042	6.71991	5.84769	4.99705	5.71411	6.77306		-0.0482623	-0.269815	0.287589	0.862094	0.988678	2.16799	-0.564667	-0.851071	-1.13039	-0.894933	-0.547215
Treml4	2.40057	0.58874	1.42674	2.03732	0.993818	0.59494	1.80284	1.89969	1.12161	0.477442	0.729554		1.66963	-1.02849	0.219432	1.12869	-0.425261	-1.01926	0.779508	0.923734	-0.234957	-1.19423	-0.818794
Tcf4	0.729501	0.829451	0.852728	0.864201	0.916308	1.22295	0.771011	0.751322	0.789041	0.506606	0.494704		-0.324888	0.182992	0.301271	0.359569	0.624342	2.1825	-0.113962	-0.214008	-0.022345	-1.45749	-1.51797
Sdc3	4.06264	1.97476	3.18481	4.38848	3.70771	2.58924	3.82554	3.96446	2.76717	1.19128	2.37999		0.966706	-1.11741	0.0904576	1.29196	0.612416	-0.504039	0.730033	0.868703	-0.32643	-1.89948	-0.712912
1700128F08Rik	0.725698	0.922405	0.862673	0.76257	0.889301	1.34508	0.531198	0.830631	0.566036	0.626928	0.378113		-0.162664	0.605902	0.37252	-0.0185992	0.47656	2.25736	-0.922607	0.247326	-0.78649	-0.548575	-1.52074
Renbp	0.416604	0.137678	1.01181	0.853658	0.546562	0.5877	0.35679	0.583449	0.652849	0.176221	0.493832		-0.429845	-1.49816	1.84986	1.24412	0.0679074	0.22547	-0.658939	0.209188	0.474998	-1.35054	-0.134054
Irf5	4.50752	2.52479	4.32903	5.24308	4.10469	4.45541	2.9322	3.23206	3.42363	2.02801	2.63053		0.91481	-1.0467	0.73823	1.6425	0.516291	0.863258	-0.643651	-0.347	-0.15748	-1.53816	-0.942092
Dtx1	170.469	166.856	163.413	233.367	215.431	175.072	123.107	119.692	126.041	108.229	103.902		0.357961	0.274069	0.194124	1.81843	1.40196	0.464841	-0.741764	-0.821059	-0.673638	-1.08723	-1.1877
Aif1	3.31642	0.996358	1.83039	2.79472	1.48328	0.789628	3.22755	2.6389	2.77917	0.461721	1.27634		1.3188	-0.94214	-0.129362	0.810395	-0.467626	-1.1436	1.23219	0.658545	0.795241	-1.46315	-0.669293
Ildr1	9.59691	8.48607	8.85157	10.8839	9.22397	10.2174	5.56225	6.69785	6.48593	5.81793	4.66242		0.82816	0.297784	0.472294	1.44264	0.650098	1.12442	-1.09821	-0.556012	-0.657195	-0.976135	-1.52784
Cmtm2a	0.862084	0.823037	1.01504	0.953336	0.807861	0.963351	0.546892	0.754564	0.635738	0.410741	0.535267		0.53843	0.341611	1.30942	0.998392	0.265116	1.04887	-1.05032	-0.00353161	-0.602482	-1.7366	-1.10891
A930007I19Rik	0.861683	1.21289	0.951159	0.957564	0.942066	1.42931	0.888287	0.984667	0.66192	0.48875	0.668772		-0.199408	1.15555	0.145791	0.170501	0.11071	1.9905	-0.0967697	0.275065	-0.970095	-1.63819	-0.94366
Nr1h3	1.82594	1.04593	1.53718	3.08574	1.6558	1.45844	2.22823	1.85604	1.25451	0.766758	1.39276		0.288459	-0.962804	-0.174759	2.30938	0.0155271	-0.301071	0.933798	0.336745	-0.628208	-1.41064	-0.406432
Sult1a1	0.867509	1.29011	0.766071	1.05809	0.894239	1.09059	1.07315	0.60745	0.839657	0.442849	0.624327		-0.0041583	1.68511	-0.409638	0.757655	0.10269	0.887568	0.817855	-1.0437	-0.115492	-1.70166	-0.976235
Klk9	0.517298	1.31503	0.746709	1.16482	0.969522	1.6258	0.530113	0.766243	0.917014	0.650024	0.673824		-1.09287	1.19804	-0.434055	0.766666	0.205814	2.0905	-1.05607	-0.377958	0.0550225	-0.711713	-0.643365
A330023F24Rik	1.42721	1.45848	2.03798	1.97755	2.15562	1.79874	1.86545	1.66749	0.844709	1.37727	0.729284		-0.319443	-0.252463	0.988818	0.859378	1.2408	0.476369	0.619261	0.195234	-1.56715	-0.426414	-1.81439
Adamts14	10.2187	8.75281	10.4957	10.6641	11.4779	12.4914	7.10705	8.16263	7.1279	6.24737	6.16896		0.558278	-0.108981	0.684366	0.76102	1.13145	1.59279	-0.858116	-0.377626	-0.848626	-1.24943	-1.28513
Il1rl1	1.88505	1.84843	2.57509	3.02101	2.73429	3.08521	2.00412	2.51727	1.93618	1.45422	1.72973		-0.666317	-0.732508	0.580928	1.38693	0.868681	1.50297	-0.451099	0.476418	-0.5739	-1.44504	-0.947058
Hsph1	76.7601	82.7029	72.7774	101.051	84.2948	62.4522	36.1761	49.9606	72.2246	42.6467	46.7194		0.522275	0.815096	0.326035	1.71917	0.893534	-0.182721	-1.47743	-0.798223	0.298797	-1.1586	-0.957927
Kremen2	3.70133	3.02887	3.38527	3.89534	2.62617	2.9913	2.59125	2.42977	2.31522	1.7815	1.67884		1.30083	0.365696	0.861313	1.57063	-0.194306	0.313451	-0.242867	-0.467424	-0.626719	-1.36892	-1.51168
Tagln3	0.73833	0.580952	1.39714	1.02918	0.790733	1.10499	0.802946	1.33865	0.631982	0.484593	0.580478		-0.394862	-0.898099	1.71177	0.535169	-0.227297	0.777581	-0.188244	1.52474	-0.734924	-1.20622	-0.899614
Ksr1	12.5364	12.8471	11.8366	16.7002	15.5864	14.7051	11.0232	9.38573	10.2334	8.36414	8.83607		0.190977	0.302625	-0.0604918	1.68721	1.28697	0.970284	-0.352782	-0.941195	-0.636591	-1.3083	-1.13871
Gabra2	0.462304	0.483803	0.510308	0.451093	0.476548	0.581186	0.26395	0.36418	0.319615	0.283198	0.273996		0.511158	0.707664	0.949926	0.408687	0.641352	1.59777	-1.30185	-0.385719	-0.793054	-1.12591	-1.21002
Mt1	5.08736	3.95588	5.78079	5.548	5.32825	5.32966	2.56289	4.58383	4.4137	1.83319	4.18068		0.534405	-0.369713	1.08849	0.902482	0.726889	0.728016	-1.48279	0.132055	-0.0038885	-2.06586	-0.190085
Lman2l	8.1332	9.04211	9.14348	14.1138	11.28	9.38572	5.81047	5.4103	6.7129	6.89848	6.05987		-0.0872926	0.258334	0.296882	2.18692	1.10933	0.388997	-0.970545	-1.12272	-0.627383	-0.556813	-0.875707
Litaf	6.84132	4.49437	6.15121	8.2047	7.92634	9.04363	5.25537	5.48724	5.61839	4.19086	5.20264		0.391823	-1.08738	-0.0431309	1.25112	1.07568	1.77987	-0.60775	-0.461609	-0.37895	-1.27868	-0.640984
Adtrp	1.13094	1.02158	0.998701	1.32422	1.31416	1.75351	1.14075	1.02948	1.12591	0.854444	0.785186		-0.0132976	-0.42835	-0.515182	0.720255	0.682074	2.34953	0.0239341	-0.398367	-0.0323879	-1.06268	-1.32553
Kmt2a	44.1121	55.0723	53.3246	61.2078	61.7961	59.9725	35.484	34.9702	39.606	32.8268	35.9403		-0.226927	0.713899	0.563876	1.24057	1.29107	1.13453	-0.967565	-1.01167	-0.613732	-1.19566	-0.928396
Basp1	1.16407	0.472435	0.473402	1.76355	0.660255	0.641849	0.845353	0.992076	0.649477	0.37531	0.778103		0.917554	-0.832491	-0.830045	2.43442	-0.35725	-0.403823	0.111104	0.482358	-0.384522	-1.07825	-0.0590589
Slc22a15	1.29703	1.00448	1.02389	1.34228	1.42171	1.13645	0.852734	0.990773	1.15938	0.722303	0.745423		0.9989	-0.251456	-0.168497	1.1923	1.53178	0.312583	-0.900017	-0.310039	0.410586	-1.45748	-1.35866
Gm17644	5.9253	7.60579	7.39775	10.0643	10.251	9.70917	6.65039	5.80687	6.0533	5.01543	6.3175		-0.764268	0.140287	0.0283056	1.46363	1.56412	1.27247	-0.373975	-0.828015	-0.69537	-1.25402	-0.553159
E330033B04Rik	0.652797	0.804719	0.94362	1.03128	1.01228	0.936274	0.828248	0.761839	0.816662	0.626813	0.500071		-0.940742	-0.0340164	0.794995	1.31818	1.20478	0.751151	0.106413	-0.28994	0.0372637	-1.09582	-1.85227
Syk	1.42556	0.978835	1.36861	1.40135	1.03601	0.811822	1.27815	1.08523	0.904807	0.443052	0.787327		1.23383	-0.223481	1.04805	1.15485	-0.0369647	-0.768312	0.752946	0.123601	-0.464976	-1.97132	-0.84822
Hmgb1-rs17	0.488262	0.582683	0.494049	0.476422	0.53381	0.724648	0.580773	0.676662	0.375068	0.456958	0.206701		-0.144896	0.523505	-0.10393	-0.22871	0.177536	1.52847	0.509984	1.18878	-0.946189	-0.366495	-2.13805
Cd81	3.61806	1.5264	2.33677	2.89186	1.55097	1.0484	3.88237	3.40263	1.88045	0.864534	1.23837		1.30222	-0.623613	0.122511	0.633593	-0.600991	-1.06372	1.54558	1.10387	-0.297632	-1.23301	-0.888808
Vmn2r97	0.57328	0.561348	0.539059	0.559378	0.577016	0.645071	0.404089	0.594702	0.489308	0.325167	0.359544		0.592515	0.477832	0.263603	0.458897	0.628423	1.28253	-1.03365	0.798411	-0.214574	-1.7922	-1.46179
Tulp4	20.5443	22.1117	24.8962	25.913	31.1274	38.8703	21.2808	21.5218	19.9901	17.7071	19.7389		-0.55673	-0.302216	0.149929	0.315037	1.16175	2.41904	-0.437138	-0.398004	-0.646721	-1.01743	-0.687511
AA467197	9.74377	10.0947	14.0846	12.1107	11.9571	20.4157	8.05776	10.7622	7.27102	7.46105	9.91947		-0.358412	-0.264271	0.806066	0.276544	0.235339	2.50446	-0.810704	-0.0852065	-1.02176	-0.970778	-0.311279
Chrne	1.56796	1.12471	1.20752	1.70784	1.43517	1.79544	1.59613	2.17031	1.88232	0.856261	1.08057		0.189491	-0.932673	-0.723025	0.543621	-0.14669	0.765396	0.260808	1.71444	0.985348	-1.6123	-1.04442
Zfp36l2	260.358	239.965	237.218	335.691	312.212	383.918	228.762	178.017	201.685	226.096	178.699		0.112676	-0.198155	-0.240025	1.2609	0.903037	1.99598	-0.368911	-1.14237	-0.78162	-0.409547	-1.13197
Gm20257	9.25834	8.37218	10.7536	12.8766	14.1795	14.5489	9.99345	9.07123	7.8338	8.67652	7.66336		-0.415616	-0.771441	0.184784	1.03724	1.5604	1.70873	-0.120443	-0.490748	-0.98762	-0.649238	-1.05606
Mboat4	0.773332	0.954117	0.682907	1.02623	0.753679	0.648131	0.706449	0.649806	0.456231	0.536892	0.41905		0.437895	1.40565	-0.0461566	1.79167	0.332691	-0.232315	0.0798653	-0.223348	-1.25957	-0.827785	-1.4586
Perp	0.387669	0.36135	0.625428	0.523756	0.614791	0.593578	0.283767	0.313217	0.302378	0.15223	0.530221		-0.24247	-0.40802	1.25306	0.613533	1.18615	1.05272	-0.896026	-0.710782	-0.77896	-1.72341	0.654198
Scd2	12.3941	13.825	13.0659	19.6438	20.2154	17.5506	8.87879	12.9908	10.4564	11.1843	11.442		-0.371572	0.010384	-0.192246	1.56362	1.7162	1.00487	-1.30993	-0.212293	-0.888811	-0.694509	-0.62572
Stx11	10.8161	11.3563	11.7839	17.7252	15.4253	17.3913	11.2549	11.7151	10.6837	8.39717	11.5346		-0.586725	-0.404251	-0.259812	1.7471	0.970217	1.63431	-0.438503	-0.283052	-0.631448	-1.40382	-0.344023
Ahdc1	8.70341	8.47291	8.90036	10.0736	9.48939	9.60653	5.39343	5.99884	7.05369	5.02001	6.49891		0.528798	0.401426	0.63763	1.28595	0.96312	1.02785	-1.30026	-0.965714	-0.382817	-1.5066	-0.689382
AI607873	3.26994	3.55114	3.77975	4.71072	5.36247	4.41137	3.34644	2.6056	3.01425	2.97631	2.76859		-0.398713	-0.0764707	0.185506	1.25236	1.99923	0.909315	-0.311048	-1.16002	-0.691723	-0.7352	-0.973238
Rasal1	8.55266	8.7981	7.50033	10.1114	11.1982	8.85594	6.47348	6.48711	5.89732	6.14785	5.81747		0.409724	0.54398	-0.165902	1.26236	1.85684	0.575619	-0.727591	-0.720135	-1.04275	-0.905711	-1.08643
2010016I18Rik	57.6729	68.8807	64.6099	76.7109	77.5327	69.6157	58.9677	50.4799	40.9053	48.9934	40.0069		-0.136914	0.708159	0.386139	1.29856	1.36052	0.763578	-0.0392857	-0.67927	-1.4012	-0.791352	-1.46894
Ccl4	39.1512	37.6304	46.5221	47.9416	38.4555	42.4101	29.6565	33.5886	34.4539	25.8177	25.4483		0.354979	0.154272	1.32775	1.51509	0.263164	0.78507	-0.898078	-0.379142	-0.264945	-1.4047	-1.45345
Alcam	5.35012	4.88595	5.37733	4.83638	5.20299	5.14806	3.52223	4.04047	3.76501	2.92119	3.12496		1.04664	0.546107	1.07598	0.492653	0.887983	0.82875	-0.924447	-0.365608	-0.662648	-1.57257	-1.35284
Igf2bp3	0.427267	0.685834	0.498584	0.631314	0.480471	0.665029	0.371727	0.384662	0.51764	0.286662	0.423774		-0.476883	1.53844	0.0789765	1.1135	-0.0621999	1.37628	-0.909773	-0.808955	0.227503	-1.57279	-0.504108
Itgam	4.62134	4.24454	5.41303	3.29646	3.58918	5.78834	3.17051	4.51968	2.95778	2.07561	2.99314		0.653421	0.32173	1.35033	-0.512849	-0.255173	1.68071	-0.623721	0.563931	-0.810984	-1.58754	-0.779857
Fbxo43	0.316844	0.45083	0.466325	0.695611	0.519601	0.401086	0.389438	0.335103	0.498949	0.256094	0.39122		-0.945744	0.182158	0.312596	2.24274	0.761077	-0.23659	-0.334643	-0.792038	0.587227	-1.45714	-0.319642
Gfra2	0.936894	0.656748	1.10535	1.05223	0.622725	0.404178	1.07016	1.27005	0.628196	0.286431	0.549316		0.488228	-0.384692	1.01313	0.84761	-0.490706	-1.17169	0.903479	1.52633	-0.473659	-1.53858	-0.719445
Notch1	31.0811	31.3342	30.9534	45.1137	44.1231	43.4665	27.2176	26.4704	29.2332	24.0582	29.4427		-0.247313	-0.213892	-0.264176	1.60566	1.47485	1.38815	-0.75748	-0.856146	-0.491325	-1.17467	-0.463661
Mylip	68.4297	71.6521	73.0643	82.8058	81.5555	83.3763	59.2972	56.6773	52.2078	52.324	47.7064		0.162066	0.405173	0.511713	1.24664	1.15231	1.28968	-0.526913	-0.724565	-1.06176	-1.05299	-1.40135
Lrp5	4.14342	4.02603	4.65233	3.3774	3.91143	5.54593	3.37122	3.4217	2.78715	2.59846	2.58586		0.516668	0.387289	1.07755	-0.327586	0.260985	2.06242	-0.334397	-0.278762	-0.978119	-1.18608	-1.19997
Mlxip	28.1368	29.6425	31.2845	30.3945	37.4742	44.71	22.8575	21.752	24.4251	22.8622	22.6256		-0.0843115	0.125359	0.354009	0.230076	1.21593	2.22353	-0.81946	-0.973402	-0.60117	-0.818806	-0.851753
Reep2	0.766211	0.941457	0.878316	1.3228	1.02183	1.2	0.8105	0.515856	0.706292	0.66192	0.773499		-0.449117	0.290626	0.0240971	1.90034	0.629894	1.38198	-0.262166	-1.50591	-0.702046	-0.889348	-0.418353
Smtn	1.33046	1.06736	1.60424	0.916423	0.942447	1.48912	0.783831	1.33058	0.937795	0.511108	0.847683		0.78855	-0.00551132	1.61484	-0.461054	-0.382511	1.2674	-0.861229	0.788912	-0.396551	-1.68433	-0.668518
Mmp16	1.00643	0.688141	0.740626	1.29808	1.17078	1.09072	0.858626	0.860659	0.842426	0.77951	0.66603		0.471457	-1.07308	-0.818394	1.88673	1.26899	0.880485	-0.245783	-0.235917	-0.324395	-0.629704	-1.18038
Selm	7.57116	5.00416	7.60517	5.02354	5.53406	6.97994	5.69158	8.81374	6.56038	3.78765	3.33338		0.935828	-0.584772	0.955975	-0.573292	-0.270878	0.585611	-0.177568	1.67189	0.337078	-1.30539	-1.57448
Rcor2	1.22947	0.800307	1.07954	1.19966	1.54491	1.28803	0.850862	1.05167	1.08182	0.741738	0.899018		0.666958	-1.12491	0.0409612	0.542493	1.984	0.911461	-0.913829	-0.0754033	0.0504808	-1.36945	-0.712765
Mmp17	0.646635	0.407042	0.509843	0.540818	0.432831	0.516139	0.468817	0.512083	0.510918	0.345816	0.260711		1.71639	-0.589993	0.399594	0.697767	-0.341742	0.460201	0.00466785	0.421157	0.409942	-1.17937	-1.99861
Mir22hg	1.45705	0.891703	1.25094	1.13738	1.18335	1.52645	0.985953	0.878558	0.895412	0.528925	1.04175		1.3594	-0.629705	0.634225	0.234679	0.396418	1.60357	-0.298099	-0.675955	-0.616656	-1.90609	-0.101784
Dgkh	7.89684	9.79892	9.20025	8.52761	10.3816	10.2126	7.2146	6.60969	7.02813	6.39074	5.5249		-0.104933	1.03818	0.678389	0.274146	1.38835	1.28679	-0.514945	-0.878483	-0.627009	-1.01007	-1.53042
Tubb4a	5.49739	4.92725	4.71667	5.55914	4.49596	5.83775	4.06606	4.35245	3.68547	3.29106	3.21586		1.09236	0.459565	0.225844	1.16089	-0.0191204	1.47012	-0.496263	-0.178401	-0.918676	-1.35643	-1.43989
Rdh18-ps	2.37902	2.21626	2.35048	2.86584	2.87618	2.49232	2.15202	2.12086	1.84103	1.96411	1.42988		0.316907	-0.0661404	0.249739	1.46261	1.48695	0.583552	-0.217326	-0.290659	-0.949224	-0.659562	-1.91684
Armcx4	0.419219	0.537719	0.551497	0.53233	0.618876	0.487315	0.377061	0.38704	0.317621	0.369378	0.306322		-0.254641	0.878328	1.01006	0.826804	1.65426	0.396419	-0.65771	-0.562302	-1.22601	-0.731167	-1.33404
Mpp2	0.612176	0.559578	0.560723	0.571913	0.524848	0.600396	0.570138	0.604228	0.600326	0.292559	0.408037		0.760835	0.22984	0.241399	0.354366	-0.120772	0.641912	0.336447	0.680597	0.641205	-2.46581	-1.30002
D930048N14Rik	2.90127	2.98868	3.13328	3.93267	3.57116	3.77877	2.328	3.28065	2.48647	2.64187	2.01827		-0.171072	-0.0276803	0.209529	1.52089	0.927848	1.26842	-1.11149	0.451281	-0.85153	-0.596604	-1.61959
Prss16	3.50501	2.25944	1.83418	1.74801	1.77609	2.25756	1.45764	2.22704	1.79496	1.37839	1.01119		2.41593	0.503179	-0.149869	-0.282196	-0.239075	0.500292	-0.728101	0.453424	-0.210097	-0.8498	-1.41369
Marveld2	6.13714	4.81275	5.68771	5.90494	5.08464	5.98598	4.47751	4.28366	4.19203	3.93595	3.08365		1.2877	-0.0597216	0.830452	1.05146	0.216896	1.13391	-0.400791	-0.598011	-0.691234	-0.951767	-1.81889
Dtx4	5.45198	4.37423	9.05725	11.0297	7.45923	8.69121	10.3673	3.46765	3.8195	5.47352	5.7701		-0.514216	-0.9209	0.846218	1.59051	0.243212	0.708094	1.34056	-1.26299	-1.13022	-0.506088	-0.394174
Trim14	32.4699	33.9483	36.9952	46.8822	54.1409	52.2077	30.8975	28.2726	30.0086	29.5189	34.1147		-0.507117	-0.349395	-0.0243367	1.03046	1.80485	1.59861	-0.674868	-0.954905	-0.769701	-0.821944	-0.331642
Gm16675	5.98744	8.39449	6.70931	9.6043	9.3089	9.93162	7.42402	5.20098	5.10113	5.55726	6.45202		-0.696199	0.638641	-0.295883	1.30955	1.14573	1.49106	0.100463	-1.13233	-1.18771	-0.934757	-0.438564
Crebbp	22.3067	25.328	24.5924	26.5568	26.764	26.0028	18.1292	17.1606	19.3304	15.5624	17.4794		0.130545	0.834747	0.663294	1.12115	1.16945	0.992029	-0.843142	-1.0689	-0.563167	-1.44141	-0.994597
Dcun1d4	6.05403	6.29766	5.99214	6.98692	8.1505	9.34393	5.09811	5.23513	5.3004	4.64096	5.5586		-0.132157	0.0394335	-0.175746	0.524884	1.3444	2.18494	-0.805417	-0.708913	-0.662943	-1.12739	-0.481091
Lrp8	1.57196	1.65005	1.60235	1.86397	2.03466	1.86547	1.20704	1.10848	1.02401	1.15336	1.25391		0.247482	0.46978	0.333993	1.07875	1.56465	1.08302	-0.791336	-1.07191	-1.31237	-0.944147	-0.657911
Hdc	0.207373	0.203057	0.178038	0.449655	0.669359	0.434499	0.30696	0.302516	0.254877	0.376393	0.273123		-0.868855	-0.89886	-1.0728	0.815518	2.34293	0.710152	-0.176514	-0.207409	-0.538601	0.306192	-0.411753
Tnfrsf21	0.753765	0.227935	0.55469	0.822014	0.484753	0.278705	0.7032	0.504518	0.367848	0.301792	0.362897		1.31607	-1.28261	0.332229	1.65336	-0.0134038	-1.03171	1.06617	0.084276	-0.591155	-0.917608	-0.615623
Plekhf1	6.27066	4.85181	5.89176	5.9365	5.38656	6.452	4.7594	4.8025	4.71371	2.8962	4.55078		1.12396	-0.283301	0.748156	0.79253	0.247082	1.30382	-0.374956	-0.332208	-0.420273	-2.22294	-0.581872
Syt11	14.8958	13.7018	14.1393	15.0775	14.6107	17.2811	11.9904	12.4799	11.6153	9.37341	10.3251		0.721253	0.205396	0.394414	0.799755	0.598078	1.7518	-0.534	-0.322515	-0.696058	-1.66465	-1.25348
Zc3hav1l	1.91637	2.44529	2.22995	3.1165	3.35971	3.27078	2.20348	1.94294	2.12718	1.93209	2.15664		-0.925339	0.0324741	-0.357482	1.24796	1.68838	1.52734	-0.405416	-0.877224	-0.543587	-0.896872	-0.490238
Abcg1	22.9548	25.2469	23.1705	36.5596	35.0355	32.7782	20.9002	21.9764	19.4906	22.921	20.8846		-0.436313	-0.0623332	-0.40112	1.78345	1.53478	1.16648	-0.771543	-0.59595	-1.00153	-0.441828	-0.774088
Cracr2b	0.954905	1.23975	1.12935	1.76367	1.50206	1.21475	0.908665	1.01491	1.1003	1.04456	0.837374		-0.737953	0.310038	-0.0961412	2.23763	1.27512	0.218059	-0.908077	-0.517185	-0.203021	-0.408098	-1.17037
4930519F09Rik	0.98059	1.24639	1.24894	1.54562	1.30768	1.4224	1.11255	0.990334	1.14727	1.00115	0.798314		-0.841256	0.379574	0.391286	1.75395	0.661081	1.18799	-0.235159	-0.796502	-0.0756883	-0.746823	-1.67846
Ccl3	14.9309	13.6905	16.4813	17.011	16.0946	19.1682	11.8262	13.8241	14.3998	11.6312	10.3764		0.167222	-0.307556	0.760656	0.963405	0.612642	1.7891	-1.02114	-0.256419	-0.0360631	-1.09578	-1.57607
Ltb4r1	0.723727	0.984834	0.845871	0.996956	1.03726	1.07039	0.364596	1.34145	0.392432	0.478113	0.829036		-0.324294	0.519647	0.0704953	0.558827	0.689096	0.796178	-1.48506	1.67229	-1.39509	-1.11816	0.0160818
Gm11110	7.6294	7.45554	10.3233	10.6863	7.95673	9.21746	6.61592	7.97034	6.9761	5.90484	5.83453		-0.148133	-0.255157	1.51017	1.73362	0.0533631	0.829437	-0.772006	0.0617411	-0.550288	-1.20973	-1.25301
Mfsd2b	0.709901	0.743868	0.74539	1.03058	0.908633	0.870686	0.988573	0.833533	0.702272	0.601042	0.586399		-0.565294	-0.33369	-0.323313	1.62125	0.789759	0.531018	1.33483	0.27769	-0.617313	-1.30755	-1.40739
Rab39b	1.04378	0.993023	1.13471	1.23451	1.319	1.24261	0.948093	1.14892	0.903852	0.775033	0.830191		-0.0468728	-0.330895	0.461946	1.0204	1.49318	1.06572	-0.58231	0.541461	-0.829871	-1.55071	-1.24206
Sytl3	58.5112	55.8101	61.5469	61.4594	78.9715	99.8321	52.7758	62.2628	54.4684	50.4072	51.2086		-0.26985	-0.453616	-0.0633212	-0.0692742	1.12214	2.54135	-0.66005	-0.0146161	-0.544896	-0.821194	-0.766672
Ppm1n	1.48857	1.71787	1.17367	2.55912	1.62743	1.67085	1.65257	1.30291	1.79689	1.37504	1.1103		-0.254012	0.327934	-1.0532	2.46296	0.0984045	0.208601	0.162208	-0.725203	0.528481	-0.542142	-1.21403
Zcchc3	1.66542	1.3325	1.37393	1.65924	1.57709	1.41415	1.20109	0.859278	0.953433	1.12759	0.846045		1.29797	0.195074	0.332324	1.2775	1.00535	0.465565	-0.240262	-1.37262	-1.0607	-0.483753	-1.41646
Slc28a3	0.324801	0.370574	0.422551	0.475387	0.554392	0.53471	0.408418	0.385824	0.331482	0.438201	0.225895		-0.857326	-0.37739	0.167596	0.721589	1.54997	1.3436	0.0194099	-0.217491	-0.787275	0.331689	-1.89437
Stip1	91.3912	93.7145	89.1996	127.572	112.193	87.967	56.0707	64.7721	88.0096	63.9883	75.4653		0.236553	0.346549	0.132791	1.94953	1.22141	0.0744337	-1.4357	-1.02373	0.0764506	-1.06084	-0.51746
Csf3r	0.478968	0.527623	0.627835	0.759415	0.659221	0.689947	0.441878	0.393028	0.441506	0.366758	0.532261		-0.456575	-0.0805143	0.694036	1.71103	0.936623	1.17411	-0.743248	-1.12082	-0.746123	-1.32386	-0.0446666
Wnt2b	0.525427	0.644951	0.596558	0.644519	0.548651	0.50327	0.514269	0.551874	0.581209	0.291212	0.432158		-0.0490208	1.13572	0.656038	1.13143	0.181178	-0.268644	-0.15962	0.213125	0.503897	-2.37059	-0.973514
Nfat5	18.4368	20.7067	20.8182	21.8657	22.9279	21.3489	16.1694	15.0129	16.3607	13.4702	14.7409		0.0258673	0.708252	0.741771	1.05667	1.376	0.901312	-0.655766	-1.00344	-0.598257	-1.46721	-1.08521
Fbxo44	0.734254	0.890041	0.467202	0.828737	0.636297	1.14765	0.352964	0.465057	0.602619	0.45461	0.661657		0.326888	0.997188	-0.822149	0.733417	-0.0945887	2.10559	-1.31368	-0.831378	-0.239494	-0.876328	0.014527
Atp10d	19.8544	20.5956	24.5565	27.3972	26.3028	29.4057	21.801	18.9405	18.1269	17.0154	18.5169		-0.521139	-0.34494	0.59665	1.27195	1.01178	1.74941	-0.0583909	-0.738393	-0.931803	-1.19603	-0.839092
Pygm	1.78166	0.928563	1.37455	2.00016	1.3644	1.94679	1.64069	1.72713	1.18319	1.25179	1.02188		0.837322	-1.48913	-0.272893	1.43319	-0.300573	1.28764	0.452888	0.688615	-0.794744	-0.607668	-1.23465
Gapdhs	1.19283	1.62364	1.71173	1.91081	1.68522	1.67462	1.62693	1.11366	1.02625	1.18178	1.08138		-0.773251	0.580053	0.85677	1.48214	0.773494	0.740196	0.590388	-1.02195	-1.29653	-0.807963	-1.12335
Olfr99	3.32919	3.4333	2.50205	4.35432	4.31461	4.74928	3.77462	4.46396	2.87298	2.16957	3.59842		-0.318254	-0.194336	-1.30276	0.901913	0.854648	1.37202	0.211922	1.03241	-0.861261	-1.6985	0.00219873
Dcdc2b	1.60921	1.60386	1.35338	2.16836	2.2979	2.24781	1.38545	1.07315	1.41274	2.11237	0.778566		-0.0612513	-0.071807	-0.566013	1.04197	1.29756	1.19873	-0.502738	-1.11892	-0.448894	0.931502	-1.70014
Vmn2r55	0.944463	1.09243	0.964345	1.3593	1.23908	1.53364	1.16835	0.950669	1.02297	0.7232	1.05955		-0.682867	-0.0168853	-0.593381	1.18426	0.643169	1.96895	0.324822	-0.654935	-0.329516	-1.67875	-0.164874
Slc4a8	0.781185	0.639396	0.698513	0.574875	0.691153	0.68123	0.523257	0.561519	0.527	0.311897	0.528392		1.49173	0.370262	0.837844	-0.140063	0.77963	0.701145	-0.548333	-0.245702	-0.518728	-2.22007	-0.507718
2810468N07Rik	0.750906	1.45974	1.02391	0.861997	1.24178	1.43451	0.714545	1.9331	1.14008	0.405874	1.12196		-0.826739	0.857037	-0.178241	-0.562852	0.339291	0.797105	-0.913112	1.98146	0.0977112	-1.64633	0.0546687
Tapbpl	68.517	67.0412	67.8654	101.313	84.8746	91.8232	63.7057	57.8635	60.9892	59.4827	60.7385		-0.189723	-0.290615	-0.234269	2.05235	0.928551	1.40359	-0.518644	-0.918041	-0.704355	-0.807346	-0.721494
Usp6nl	1.8063	1.92783	2.5419	2.11719	2.0592	2.09876	1.77945	1.37023	2.24239	1.0576	1.66858		-0.176191	0.118183	1.6056	0.576856	0.436391	0.532215	-0.241228	-1.23245	0.880119	-1.98971	-0.50978
Slc43a3	2.57417	2.46377	2.2592	2.7588	2.98566	3.27149	1.62632	2.27158	1.98388	1.52949	2.39387		0.375932	0.168195	-0.21674	0.723346	1.15022	1.68806	-1.40762	-0.193445	-0.734804	-1.58982	0.0366653
Daxx	38.1253	37.8054	36.5183	50.4626	59.5095	54.4861	35.0665	37.6233	37.6609	34.8912	36.7556		-0.412186	-0.448881	-0.596523	1.00302	2.04078	1.46455	-0.763058	-0.46977	-0.465457	-0.783167	-0.569303
Plin2	8.26404	8.17663	7.39725	13.6056	11.3488	10.1688	6.80582	7.49637	8.06105	6.8419	8.47273		-0.247776	-0.289321	-0.659747	2.29098	1.21836	0.657525	-0.940844	-0.612637	-0.344254	-0.923696	-0.148589
Inpp4a	13.4134	13.9317	15.9563	14.7529	14.0684	14.9304	11.2891	11.0007	9.96156	7.99466	11.0895		0.338099	0.548564	1.37069	0.882027	0.604073	0.954104	-0.524511	-0.641621	-1.06358	-1.86228	-0.605563
Gm28042	3.94976	4.34421	2.90125	4.24749	4.45276	4.37147	4.16134	4.998	3.93892	2.89429	2.81336		0.0467186	0.587985	-1.39205	0.455266	0.736938	0.625392	0.33705	1.48512	0.0318439	-1.4016	-1.51266
Gadd45b	16.3347	13.8497	15.5076	22.63	20.7072	20.0064	16.9939	13.8389	13.5209	13.8572	13.8706		-0.040138	-0.804505	-0.294547	1.89625	1.30481	1.08925	0.162627	-0.807827	-0.905641	-0.802198	-0.798076
Phf11d	1.75243	1.66109	1.86692	2.32631	2.23417	2.34824	2.30746	1.42685	1.52148	1.45631	1.57002		-0.290598	-0.535021	0.0157736	1.24509	0.998524	1.30377	1.19465	-1.16184	-0.908614	-1.08301	-0.778722
Lin9	5.44087	5.50353	5.99072	5.75969	5.61172	5.87924	4.29822	4.16325	5.17315	3.80811	3.75198		0.474172	0.547302	1.1159	0.846267	0.673571	0.985794	-0.859418	-1.01694	0.161715	-1.43143	-1.49694
Myo1e	1.26974	1.21066	1.36625	1.18689	1.10988	1.1849	1.02549	0.933929	1.09177	0.817035	0.713697		0.951725	0.651026	1.44293	0.530045	0.138087	0.519916	-0.291432	-0.757449	0.0459132	-1.3524	-1.87836
Fcho1	74.9133	70.5048	79.2339	100.125	91.368	97.3569	71.7818	62.6668	67.814	63.3597	63.7697		-0.124839	-0.446041	0.189958	1.71208	1.07405	1.51039	-0.352999	-1.01712	-0.642092	-0.966631	-0.936758
Tuft1	1.14397	1.3061	1.49221	1.67446	1.36735	1.28187	0.969723	0.826382	1.07375	0.832487	1.07236		-0.155129	0.450268	1.14521	1.82573	0.678976	0.359792	-0.80577	-1.34101	-0.417332	-1.31821	-0.422522
Stat3	61.407	63.3956	62.4209	89.8696	80.614	87.8401	60.8148	56.8693	62.1286	54.4014	59.5614		-0.460866	-0.302965	-0.380359	1.79914	1.06422	1.63799	-0.507888	-0.821171	-0.403569	-1.01713	-0.607411
Vmn1r65	2.22469	2.4282	2.56835	2.58896	3.57662	2.97211	2.25292	1.89363	2.05073	1.75039	2.28106		-0.374379	0.02168	0.294431	0.334541	2.25667	1.0802	-0.319439	-1.01867	-0.712929	-1.29743	-0.264675
Apol7e	20.9004	20.7377	21.5253	34.8594	28.8399	30.408	22.4576	18.797	20.4645	18.9904	22.6703		-0.531478	-0.562415	-0.412656	2.12277	0.978189	1.27636	-0.235382	-0.931432	-0.614363	-0.894657	-0.194938
Fancm	3.20652	3.06129	3.40675	3.77408	3.53695	3.78614	2.75884	2.76567	3.042	2.37347	2.53956		0.19367	-0.109523	0.611685	1.37855	0.8835	1.40373	-0.74094	-0.726682	-0.149794	-1.54547	-1.19873
Tcirg1	61.8752	58.1038	62.3799	68.6164	60.7255	70.3867	48.9744	50.2155	49.9904	42.3212	46.1589		0.593446	0.18905	0.647564	1.31629	0.470167	1.50611	-0.789869	-0.656789	-0.680926	-1.50327	-1.09177
F730043M19Rik	5.36922	5.29423	7.17013	7.07085	6.54448	7.11968	5.46651	6.96719	4.77632	4.33177	4.86392		-0.497855	-0.567309	1.17012	1.07816	0.59065	1.12339	-0.407747	0.982156	-1.04699	-1.45872	-0.965855
Med13	16.4527	18.2924	18.2671	19.0659	19.8206	19.9443	13.5369	14.5421	15.4157	13.1287	12.9652		-0.0151574	0.66361	0.654276	0.948998	1.22745	1.27309	-1.09096	-0.720084	-0.397764	-1.24157	-1.30189
Gfi1	17.5845	15.9809	22.0806	25.6415	18.4378	21.5563	19.9498	12.9353	16.3036	12.5833	16.5417		-0.142054	-0.548454	0.997391	1.89983	0.0741973	0.864518	0.457383	-1.3203	-0.466672	-1.40951	-0.406331
E330023G01Rik	9.01586	12.0226	10.825	11.3052	15.9712	13.1736	10.4983	9.17201	7.94635	9.2049	8.7384		-0.725434	0.557691	0.0466158	0.251541	2.24276	1.04888	-0.0928034	-0.658797	-1.18185	-0.644762	-0.84384
Sbno2	25.7783	27.6183	25.3592	40.0494	34.3069	36.024	28.0343	24.4992	24.3196	23.2924	25.7259		-0.513383	-0.18295	-0.588646	2.04947	1.01821	1.32657	-0.108243	-0.743088	-0.775341	-0.959809	-0.522793
Mertk	0.754642	0.399025	0.599762	0.633255	0.297014	0.28461	0.603204	0.792627	0.361729	0.0770465	0.127788		1.25746	-0.202004	0.62183	0.759286	-0.620661	-0.671568	0.635956	1.41336	-0.355068	-1.52342	-1.31517
Mir2861	144.945	399.172	559.984	141.43	135.828	227.772	206.889	190.3	534.443	147.984	0		-0.5618	0.873818	1.78192	-0.581649	-0.613283	-0.0940763	-0.212003	-0.30568	1.63769	-0.544639	-1.3803
Hist1h3e	0.380255	0	0	0.55655	0.178169	0.398365	0.542762	1.1649	0.701041	0.388228	0		-0.0327804	-1.10848	-1.10848	0.465938	-0.604459	0.0184508	0.426933	2.18689	0.874687	-0.0102257	-1.10848
Tbxas1	0.741248	0.21984	0.566459	0.417273	0.213731	0.179204	0.922386	0.499076	0.289083	0.116429	0.193108		1.32486	-0.676969	0.653799	0.0810318	-0.700423	-0.832982	2.0203	0.395096	-0.411125	-1.07399	-0.7796
Msc	0.334718	0.221232	0.480317	0.261281	0.501864	0.455857	0.254808	0.732429	0.493671	0.170868	0.11336		-0.167549	-0.785436	0.625181	-0.567385	0.742496	0.492006	-0.602628	1.99783	0.697889	-1.05965	-1.37276
Cmbl	0.604248	0.199689	0.266797	0.471676	0.226497	0.25321	0.632487	0.528885	0.389899	0.246767	0.102321		1.38771	-0.87916	-0.503132	0.644871	-0.728946	-0.579264	1.54595	0.965431	0.186648	-0.615366	-1.42474
Cadm1	0.694644	0.279709	0.343245	0.273489	0.13703	0.130296	0.579843	0.765407	0.449362	0.126981	0.2786		1.443	-0.395466	-0.113955	-0.423025	-1.02764	-1.05747	0.934347	1.75653	0.356221	-1.07216	-0.400379
Cybb	0.456142	0.245112	0.515788	0.705617	0.291918	0.256416	0.688135	0.623222	0.358941	0.193098	0.207233		0.22227	-0.86182	0.52868	1.50386	-0.621371	-0.80375	1.41405	1.08058	-0.277065	-1.12902	-1.05641
Cd14	0.659534	0.458863	0.728019	0.711282	0.422877	0.254559	0.792754	0.486127	0.607962	0.10632	0.382073		0.700636	-0.239812	1.02159	0.943154	-0.408461	-1.19729	1.32497	-0.112039	0.458943	-1.89201	-0.59969
AF251705	0.540916	0.536278	0.417958	0.844478	0.202757	0.226671	0.823556	0.757523	0.54848	0.165677	0.412184		0.178124	0.158936	-0.330576	1.43402	-1.2209	-1.12197	1.34746	1.07427	0.209418	-1.37431	-0.354464
Tmem91	0.502906	0.331625	0.333601	0.589619	0.188797	0.105522	0.702601	0.52838	0.704421	0.205696	0.340385		0.439056	-0.389481	-0.379922	0.858513	-1.08038	-1.48321	1.40504	0.562282	1.41384	-0.998637	-0.347106
Cdk3-ps	0.620308	0.683321	0.547776	0.524564	0.503786	0.519881	0.983784	0.47055	0.991125	0.295547	0.420162		0.109717	0.399339	-0.223655	-0.330342	-0.425843	-0.351866	1.78033	-0.578602	1.81407	-1.38295	-0.810196
Smagp	1.08321	0.779487	0.762465	1.33142	0.37534	0.349491	1.49845	0.836896	1.10854	0.576087	0.452243		0.650011	-0.136342	-0.180413	1.29264	-1.1827	-1.24962	1.72509	0.0122926	0.715591	-0.662954	-0.983592
Src	0.441563	0.410414	0.548348	0.525111	0.413788	0.43371	0.709074	0.579746	0.432475	0.267665	0.268731		-0.121532	-0.361635	0.70159	0.522474	-0.335628	-0.182065	1.9405	0.943613	-0.191584	-1.46198	-1.45376
Lyz2	3.67607	1.3716	1.04717	2.25629	0.666745	1.55288	5.47277	1.66069	1.47569	0.847484	1.90763		1.19107	-0.440811	-0.670553	0.185672	-0.939946	-0.31244	2.46339	-0.236095	-0.367101	-0.811958	-0.0612275
Mir6236	1132.95	2017.03	1288.49	1306.47	1093.86	731.326	1938.38	1532.54	1065.45	630.929	833.283		-0.222965	1.73354	0.121251	0.161041	-0.309473	-1.11177	1.55948	0.661343	-0.372345	-1.33396	-0.88614
Pla2g2d	0.491029	0.216364	0.243908	0.311429	0.207065	0.205766	0.770965	0.365319	0.27158	0.250662	0.207872		0.981219	-0.613185	-0.453295	-0.061342	-0.667165	-0.674706	2.60622	0.251484	-0.292662	-0.414089	-0.662481
Miat	1.0695	0.719986	1.21336	0.481195	1.01973	0.915035	1.11949	1.69542	1.1836	0.394301	0.910558		0.262306	-0.70522	0.660541	-1.36624	0.124533	-0.165285	0.400689	1.99498	0.578159	-1.60678	-0.177678
Slc41a3	0.640515	0.488479	0.382263	0.528831	0.277028	0.550543	0.726709	0.668442	0.317923	0.226365	0.33373		1.0159	0.123966	-0.499157	0.360694	-1.11653	0.488069	1.52156	1.17973	-0.876612	-1.41374	-0.783879
Plxnb2	0.827535	0.499506	0.679293	0.775993	0.481779	0.252471	0.70117	0.823093	0.552341	0.246046	0.435293		1.22727	-0.338433	0.5197	0.981253	-0.423044	-1.51754	0.62412	1.20606	-0.0862486	-1.54821	-0.644924
1700102P08Rik	1.30116	1.49566	1.31138	1.65601	1.11329	1.12607	2.31481	1.38646	1.87735	0.981893	0.862175		-0.240033	0.221172	-0.215799	0.6014	-0.685518	-0.655213	2.16357	-0.0377669	1.12625	-0.997091	-1.28097
Snhg10	1.71175	3.59984	2.57658	2.2776	1.74991	2.60839	2.81348	4.22235	3.01235	2.22426	1.31755		-0.992829	1.22801	0.0244144	-0.327256	-0.947944	0.0618304	0.303064	1.96023	0.536982	-0.389997	-1.4565
Gm1720	0.116803	0.128669	0.386796	0.189951	0.182428	0.244732	0.703932	0.374863	0.358899	0.278255	0.230755		-1.04593	-0.974501	0.579359	-0.605599	-0.650885	-0.275831	2.48844	0.507525	0.411426	-0.0740309	-0.359969
9030619P08Rik	1.54901	1.45041	1.36789	0.755726	1.37901	0.892534	0.515902	1.69477	1.14231	0.474448	0.721336		1.07277	0.844435	0.653341	-0.764268	0.679092	-0.447457	-1.31964	1.41031	0.130958	-1.41563	-0.843906
Gm2011	1.20009	1.60529	1.60857	0.83642	1.12461	1.16744	1.79453	1.12544	1.26428	0.700144	0.798358		-0.0062319	1.14242	1.15172	-1.03716	-0.220202	-0.0987878	1.67888	-0.217849	0.175733	-1.42347	-1.14506
Cfp	11.8777	6.28887	9.00853	10.0942	6.71425	6.66321	9.55243	11.1676	7.84081	5.04627	5.5149		1.6011	-0.806353	0.36517	0.832834	-0.623116	-0.645102	0.599461	1.29521	-0.137838	-1.34162	-1.13975
Sema6b	0.801885	0.741378	0.806524	0.65669	0.818539	0.78007	0.667673	1.09041	0.950373	0.453208	0.606193		0.238855	-0.116168	0.266074	-0.613072	0.336572	0.110856	-0.54863	1.93177	1.1101	-1.807	-0.909362
Mustn1	1.60805	1.02855	1.03066	1.21475	0.874976	1.46726	1.28338	1.40749	1.57794	0.635521	1.05407		1.33991	-0.555658	-0.548756	0.0534079	-1.058	0.879376	0.277899	0.683867	1.24141	-1.84127	-0.472182
App	1.91198	1.32853	1.41824	1.40666	1.05242	0.91996	2.13779	1.70166	1.57869	1.03645	1.11823		1.27519	-0.234467	-0.00234519	-0.0323081	-0.948893	-1.29163	1.85947	0.730995	0.412814	-0.990215	-0.778612
Cd300e	0.289833	0.12771	0.415908	0.197964	0.217283	0.0910912	0.413698	0.735687	0.320604	0.147955	0.441713		-0.102728	-0.969815	0.571562	-0.594074	-0.490749	-1.16566	0.559742	2.28184	0.061845	-0.861538	0.709575
4833418N02Rik	0.800975	0.546211	0.547329	0.669901	0.428911	0.559415	1.05255	0.80123	0.984456	0.623062	0.5167		0.579151	-0.688845	-0.68328	-0.0732223	-1.27266	-0.623127	1.83128	0.58042	1.49236	-0.306347	-0.835725
Zfp112	0.444053	0.337353	0.287337	0.328699	0.387425	0.465202	0.568257	0.522694	0.40933	0.390831	0.220397		0.466878	-0.580864	-1.072	-0.665842	-0.0891817	0.67455	1.6865	1.23909	0.125915	-0.0557364	-1.72931
Slc37a2	2.49549	1.57467	2.38021	1.43025	1.75957	1.87827	2.4784	1.91917	1.69735	1.33574	1.17952		1.45551	-0.558066	1.20343	-0.873873	-0.153741	0.105824	1.41814	0.195261	-0.289799	-1.08054	-1.42215
Gm3435	0.278502	0.368152	0.768553	0.597847	0.443674	0.554355	0.50353	0.682547	0.539121	0.170605	0.542345		-1.25386	-0.735568	1.57926	0.592364	-0.298954	0.340924	0.0470906	1.08204	0.252852	-1.87764	0.271491
Jup	1.26309	0.672509	1.51043	0.903804	0.710186	1.03654	1.65265	1.63991	1.42629	0.548068	1.40809		0.252412	-1.2085	0.864255	-0.636351	-1.1153	-0.308003	1.21606	1.18455	0.656118	-1.51633	0.611097
Pyroxd2	0.746062	0.363143	0.383038	0.37245	0.406475	0.272649	0.660405	0.728944	0.543782	0.495994	0.308493		1.5834	-0.696562	-0.578104	-0.641147	-0.438557	-1.23538	1.07338	1.48148	0.378992	0.0944541	-1.02196
Carns1	12.0259	10.0652	11.6728	9.58412	9.2171	12.5002	15.8037	15.1246	13.8477	10.6182	8.24809		0.132404	-0.665867	-0.0113558	-0.861732	-1.01116	0.325508	1.67048	1.39399	0.874123	-0.440721	-1.40568
Gm4013	5.00912	4.20416	2.63298	2.5602	2.23526	4.99779	5.67447	5.84583	4.61743	3.1659	3.63524		0.744616	0.117997	-1.10508	-1.16174	-1.41469	0.735796	1.26256	1.39595	0.439706	-0.690234	-0.324877
Hspa2	0.676372	0.408588	0.6021	0.375918	0.470257	0.411432	0.581333	0.80575	0.715595	0.467792	0.42486		0.941785	-0.907528	0.428864	-1.13315	-0.481642	-0.887887	0.285447	1.83527	1.21266	-0.498666	-0.795154
Rn45s	227.813	306.511	239.805	255.884	216.953	194.583	293.824	301.44	279.389	156.194	218.073		-0.350437	1.29359	-0.0999202	0.235975	-0.577305	-1.04462	1.02855	1.18765	0.727001	-1.84658	-0.553908
Gm19434	0.662102	0.682305	0.848733	0.625206	0.600442	0.895013	0.873927	0.785161	0.728457	0.588761	0.434004		-0.284336	-0.141047	1.03934	-0.54602	-0.721658	1.36758	1.21803	0.588456	0.186284	-0.804505	-1.90211
Sowahc	0.469602	0.400912	0.673874	0.572768	0.506075	0.750251	0.525063	0.945376	0.69261	0.419518	0.516884		-0.729069	-1.15045	0.524047	-0.0961924	-0.505324	0.992585	-0.388841	2.18959	0.638984	-1.03631	-0.439015
Eif3j2	34.529	18.2746	34.1549	34.9201	36.4994	11.0217	22.0127	14.6015	25.6551	37.6772	24.6797		0.826142	-0.895592	0.786516	0.867569	1.03486	-1.66385	-0.499637	-1.28466	-0.113818	1.15961	-0.217137
Nr6a1	0.37207	0.452237	0.326823	0.48683	0.610172	0.310062	0.458661	0.429288	0.319593	0.648129	0.572773		-0.687858	-0.00925821	-1.07087	0.283565	1.32763	-1.21274	0.0451198	-0.203517	-1.13207	1.64893	1.01106
H2-T3	1.07608	1.15717	1.18782	1.39999	1.48859	1.39575	1.17026	0.20183	1.13365	1.2556	1.27988		-0.241647	-0.00471478	0.0848396	0.704766	0.963641	0.692377	0.0335321	-2.79606	-0.0734364	0.282882	0.353824
Brip1	0.721551	0.51334	0.497797	0.726056	0.655037	0.803161	0.486349	0.493405	0.498847	0.42973	1.06912		0.4937	-0.59076	-0.671715	0.517164	0.147264	0.918763	-0.731342	-0.694591	-0.666246	-1.02624	2.304
Pole	2.85564	3.07332	3.42627	3.05007	3.84636	3.79503	2.96755	3.10038	2.72659	2.79621	6.48666		-0.57009	-0.366714	-0.0369562	-0.388436	0.355529	0.307572	-0.465533	-0.341432	-0.69066	-0.625615	2.82233
Mcm5	15.3119	15.4044	15.2979	17.7459	22.4204	21.183	15.1858	15.5459	14.9704	15.8084	32.8514		-0.554251	-0.537313	-0.556815	-0.108546	0.74743	0.520842	-0.577342	-0.511402	-0.616785	-0.463334	2.65752
Lig1	9.41189	9.42039	11.2972	10.5243	11.0947	11.9962	8.63038	8.0028	8.07443	9.06173	17.3361		-0.389061	-0.385847	0.323747	0.0315247	0.247185	0.588028	-0.684538	-0.921817	-0.894735	-0.521451	2.60697
Stkld1	0.514768	0.198471	0.198877	0.401828	0.578869	0.350535	0.244921	0.360453	0.260984	0.525562	0.414052		1.09793	-1.27014	-1.2671	0.252367	1.57785	-0.131656	-0.922372	-0.0574017	-0.802111	1.17874	0.343886
Cenpn	0.970126	0.85494	1.28503	0.978154	0.757589	1.62613	0.892377	0.481174	1.16255	1.18856	1.56063		-0.289918	-0.628208	0.634922	-0.266341	-0.914117	1.6367	-0.518259	-1.72592	0.275211	0.3516	1.44433
Cks1b	5.21299	5.74255	4.94668	6.51439	6.34206	7.18587	5.48272	4.56282	5.39549	6.06928	11.0731		-0.573446	-0.274796	-0.723634	0.160489	0.0633022	0.539176	-0.42133	-0.940115	-0.470524	-0.0905342	2.73141
Serpine2	0.300559	0.421389	0.452412	0.479898	0.30726	0.572498	0.286005	0.286989	0.453366	0.502137	0.647762		-1.04393	-0.0557578	0.197956	0.422743	-0.989132	1.18005	-1.16296	-1.15491	0.205758	0.604619	1.79558
Apitd1	1.3236	1.76501	1.07656	1.83529	1.69732	1.60558	1.39208	1.64632	1.02745	1.13798	3.42098		-0.465096	0.205301	-0.840292	0.31204	0.102496	-0.0368355	-0.361091	0.0250389	-0.914878	-0.747009	2.72033
Lrp11	0.570229	0.453667	0.664409	0.880968	0.771857	0.431446	0.602907	0.554566	0.525639	0.857105	1.04607		-0.504193	-1.09928	-0.0233749	1.08223	0.525181	-1.21272	-0.337362	-0.584158	-0.731839	0.960398	1.92512
Bub1b	0.759007	0.723557	0.563918	0.783328	0.779658	0.978653	0.583358	0.740997	0.780386	0.625898	1.91555		-0.214752	-0.309352	-0.735354	-0.149851	-0.159644	0.371381	-0.683478	-0.262813	-0.157702	-0.569958	2.87152
Neil3	0.0740498	0.163144	0.0544927	0.0722541	0.0231307	0.206871	0.164416	0.36728	0.273038	0.0756024	0.898649		-0.56828	-0.210899	-0.646729	-0.575483	-0.77253	-0.0354985	-0.205797	0.607945	0.229915	-0.562052	2.73941
Spc24	1.6785	2.33559	2.19409	1.68089	2.35938	2.49883	1.63925	1.66246	1.50653	2.16466	3.77727		-0.705889	0.307661	0.0893994	-0.702202	0.344356	0.559455	-0.766431	-0.73063	-0.971149	0.0440042	2.53142
Ube2c	2.08702	2.75883	1.53582	2.51157	2.15132	4.00843	2.25075	2.0094	2.30859	2.48591	5.94903		-0.523398	0.0214138	-0.970399	-0.179104	-0.471253	1.03479	-0.390619	-0.586345	-0.343713	-0.199914	2.60854
Cdca7	5.74461	5.01088	4.81408	6.26879	8.76707	7.09903	4.75245	4.76134	4.84152	6.10445	12.3681		-0.28585	-0.6001	-0.684388	-0.0613481	1.00864	0.294237	-0.710783	-0.706976	-0.672635	-0.131733	2.55093
Cdca8	2.09844	2.27242	1.13854	1.6658	1.86646	2.16112	1.69222	1.02732	1.60649	1.96087	3.64375		0.255465	0.506261	-1.12825	-0.368195	-0.078939	0.34582	-0.33011	-1.28858	-0.453691	0.057155	2.48306
Ckap2	0.675191	0.534592	0.815174	0.679406	0.869994	0.884185	0.461794	0.480172	0.544595	0.732432	1.23267		-0.193627	-0.813495	0.423526	-0.175044	0.665215	0.72778	-1.13445	-1.05342	-0.769395	0.0587356	2.26417
Ncapg	0.796133	0.861061	1.08653	0.875706	0.990232	1.15252	0.592303	0.803065	0.747238	0.783268	2.13252		-0.454529	-0.29718	0.249229	-0.261689	0.0158572	0.409152	-0.948498	-0.43773	-0.573023	-0.485707	2.78412
Pask	0.195513	0.158697	0.0908695	0.0803251	0.125358	0.161704	0.166462	0.171129	0.227653	0.0945533	0.845111		-0.0703854	-0.241345	-0.55631	-0.605274	-0.396158	-0.227381	-0.205287	-0.183615	0.0788605	-0.539204	2.9461
Ninj2	0.163674	0.631052	0.271004	0.479115	0.843586	0.428673	0.155748	0.501411	0.226313	0.835529	0.762187		-1.22182	0.574004	-0.809423	-0.00978993	1.39063	-0.203605	-1.25228	0.0758789	-0.981141	1.35967	1.07787
Riiad1	0	0.262794	0.263332	0.465551	0.223555	0.374883	0	0.208807	0.109953	0.608906	0.403968		-1.40137	-0.0148759	-0.0120374	1.05487	-0.2219	0.576504	-1.40137	-0.29971	-0.821263	1.81121	0.729956
Cyp3a13	0.569923	0.324035	0.405873	0.412592	0.430707	0.520026	0.857224	0.450567	0.559252	0.788344	0.575938		0.208889	-1.29908	-0.797192	-0.755986	-0.64489	-0.0971179	1.97084	-0.523094	0.143446	1.54841	0.245777
Zik1	0.900654	0.740616	0.826146	0.79217	0.879667	0.784076	0.953609	1.15473	1.15764	1.12676	1.3318		-0.346557	-1.17025	-0.730037	-0.904906	-0.454574	-0.946565	-0.0740063	0.96113	0.976108	0.817173	1.87248
Gbe1	5.14118	5.6034	4.89296	5.03423	4.85185	5.23378	7.34697	6.77379	7.48553	8.03111	7.1062		-0.820258	-0.439318	-1.02483	-0.908401	-1.05871	-0.743942	0.99765	0.525262	1.11184	1.56149	0.799218
Wdr95	15.4081	13.8673	13.5771	10.5285	10.0074	11.4901	16.6268	16.1293	16.6797	16.1166	15.9783		0.473923	-0.140182	-0.255844	-1.4709	-1.67859	-1.08764	0.959651	0.761366	0.980735	0.756304	0.701183
Rhoc	15.7876	13.209	13.4981	10.0783	9.73477	9.95009	15.8162	14.9515	16.1262	15.7575	14.0727		0.889884	-0.132787	-0.0181304	-1.37442	-1.51066	-1.42527	0.901227	0.558287	1.02417	0.877946	0.209756
AI854703	1.83149	1.85217	1.78967	2.10934	1.85697	1.66708	3.15704	2.35204	2.53241	2.92745	2.73277		-0.821144	-0.781077	-0.902169	-0.282817	-0.771777	-1.13968	1.74708	0.187408	0.536871	1.30225	0.925063
Gkap1	0.654329	0.847999	0.807247	0.713576	0.685312	0.685493	0.769149	0.673789	0.780565	1.02172	1.07543		-0.977782	0.395357	0.106421	-0.557715	-0.75811	-0.756826	-0.163697	-0.839809	-0.0827569	1.62705	2.00786
Socs5	3.19873	4.05555	3.67745	3.34495	3.46131	2.59234	4.41069	4.374	4.61763	5.17598	4.2924		-0.978027	0.172057	-0.335455	-0.78176	-0.625574	-1.79197	0.648751	0.599503	0.92652	1.67598	0.489974
Smad1	2.72374	2.35328	2.6725	2.48398	2.68588	2.76021	3.76072	3.28778	3.62665	4.16218	3.82849		-0.634092	-1.22346	-0.715611	-1.01553	-0.694325	-0.576072	1.01566	0.263249	0.802364	1.65435	1.12347
Daam1	1.24551	1.50299	1.43821	1.22774	1.02815	1.05598	1.59543	1.40951	1.3538	1.83929	1.50178		-0.574217	0.511619	0.238431	-0.649156	-1.49086	-1.3735	0.901454	0.117398	-0.11754	1.92985	0.506516
Eif5a2	2.22882	2.19923	1.93555	1.7831	1.97974	1.78166	3.00543	2.90314	2.95035	3.15989	2.43265		-0.320833	-0.377509	-0.882555	-1.17455	-0.797915	-1.17731	1.16667	0.970744	1.06117	1.46252	0.0695787
Zfp938	3.79458	3.63085	4.37205	3.24312	3.81547	3.42398	4.87594	5.09107	5.02977	5.23151	5.34684		-0.702972	-0.910023	0.0272886	-1.40034	-0.676555	-1.17163	0.664501	0.936552	0.859033	1.11415	1.26
Ppp1r13l	0.501267	0.361778	0.534238	0.421648	0.469738	0.325949	0.361857	0.363102	0.446137	0.511777	0.717111		0.407306	-0.844282	0.703144	-0.307089	0.124407	-1.16576	-0.843573	-0.832402	-0.087357	0.501609	2.344
Lysmd2	18.1788	14.264	19.9544	14.0219	15.0368	14.2036	22.7103	16.9782	19.3786	22.1372	21.5397		0.0425438	-1.12937	0.574078	-1.20184	-0.898029	-1.14745	1.39907	-0.316862	0.40171	1.22751	1.04865
Tubb2a	1.58613	1.1516	1.63145	1.30145	0.878306	1.01966	1.78374	1.73538	1.82763	1.95062	1.2819		0.329531	-0.882492	0.455941	-0.46452	-1.64478	-1.25051	0.880719	0.74583	1.00314	1.34619	-0.51905
Btbd11	16.738	16.4328	13.4271	12.6998	13.0625	10.3617	18.2028	17.4013	19.1739	19.447	17.1011		0.308075	0.205367	-0.806132	-1.05089	-0.92883	-1.83772	0.80102	0.531294	1.12782	1.21973	0.430268
Txk	40.0798	41.1011	44.5521	42.3009	44.7672	46.9502	71.0875	60.0464	58.1697	66.7093	68.9525		-1.08802	-1.00304	-0.715897	-0.90321	-0.698	-0.516362	1.49199	0.573314	0.417162	1.1277	1.31435
Cfap36	9.93111	9.33487	11.8512	6.88422	7.33019	7.15031	11.603	9.96784	11.3106	10.5308	11.1031		0.111013	-0.213309	1.15543	-1.54633	-1.30374	-1.40159	1.02043	0.130992	0.861379	0.437211	0.74851
Zwilch	0.744919	1.12291	1.12521	1.09028	1.37776	1.23221	1.36173	1.42413	1.1565	1.24088	2.50623		-1.28319	-0.421066	-0.41582	-0.495488	0.160195	-0.171775	0.123634	0.265956	-0.344454	-0.152	2.734
Tmem256	30.0764	24.0512	23.3626	17.8256	23.3828	23.3399	28.832	37.6354	30.8051	30.4796	34.8966		0.406508	-0.623661	-0.741395	-1.68809	-0.737941	-0.745276	0.193745	1.69892	0.531099	0.475446	1.23065
Kiz	8.62858	8.13088	8.34834	5.65516	5.67472	6.04451	9.69463	9.78174	10.3257	9.39327	8.20785		0.271387	-0.0240519	0.105034	-1.49366	-1.48205	-1.26254	0.904203	0.955912	1.27881	0.725313	0.0216381
Rdh5	1.62838	2.0576	2.16754	2.00949	2.10942	1.80629	2.59774	1.92833	2.60477	3.61844	2.39249		-1.17397	-0.383081	-0.180502	-0.47173	-0.287596	-0.846152	0.612197	-0.621278	0.625151	2.49297	0.233997
Zfp947	0.927056	0.975842	0.886877	0.84427	0.791524	0.884879	0.999786	1.1901	0.911535	0.98856	1.56984		-0.324551	-0.0991342	-0.510199	-0.707066	-0.95078	-0.519431	0.0114996	0.89085	-0.396266	-0.0403704	2.64545
Atn1	23.8282	25.0526	23.8654	20.6958	21.685	20.1727	27.2437	27.2558	30.8399	32.2359	31.2992		-0.467488	-0.182122	-0.458818	-1.19754	-0.966994	-1.31946	0.328549	0.331369	1.1667	1.49206	1.27375
Car12	0.871484	1.24802	1.04215	1.2472	1.53809	1.17168	1.40979	1.51414	1.62009	2.03164	1.99228		-1.52128	-0.488373	-1.05311	-0.490622	0.307343	-0.697787	-0.0446077	0.241644	0.532284	1.66124	1.55327
Hs1bp3	2.42413	2.81199	2.39204	2.27575	2.20282	1.86621	3.42516	2.57186	3.318	3.28119	3.17198		-0.529314	0.204924	-0.590062	-0.810205	-0.948265	-1.58548	1.36569	-0.249654	1.16283	1.09314	0.886403
Ccdc64	26.5915	28.8535	23.0556	25.1386	23.4531	20.6284	32.3959	27.3823	30.4211	35.2593	35.161		-0.293887	0.167942	-1.01581	-0.590524	-0.93465	-1.51136	0.891188	-0.132431	0.487996	1.4758	1.45573
Tatdn3	3.32615	3.34068	3.39405	2.24312	3.25437	2.76288	4.42184	5.82045	4.73562	4.42821	3.97458		-0.461124	-0.446713	-0.39378	-1.53527	-0.532315	-1.01977	0.625581	2.01272	0.936788	0.631899	0.181989
Lipo1	1.6276	1.85934	1.73006	1.68616	1.6382	1.72616	2.5813	2.16328	2.25975	2.29769	2.84117		-0.979849	-0.425664	-0.734825	-0.839808	-0.9545	-0.744152	1.30084	0.30118	0.531879	0.622609	1.92229
Rgs11	3.92932	4.23572	4.15145	3.23154	2.70903	2.58749	4.11295	4.00427	5.04502	5.04329	3.6358		0.0604888	0.440392	0.335906	-0.804684	-1.45254	-1.60324	0.28817	0.153419	1.44384	1.44169	-0.303445
Wscd2	1.88828	1.781	1.81189	1.1922	1.41098	1.49982	2.23137	2.29011	1.78613	2.35628	1.8182		0.174455	-0.117635	-0.0335312	-1.72075	-1.12508	-0.883201	1.10858	1.26851	-0.103668	1.44867	-0.016351
Wdsub1	2.57278	2.92466	2.4531	1.95945	2.06958	2.13175	2.46231	2.6686	3.0106	3.0649	3.2085		-0.048127	0.777419	-0.328908	-1.48706	-1.22868	-1.08283	-0.307301	0.176676	0.979043	1.10644	1.44334
Ift57	2.35993	2.17036	1.95971	1.62668	2.17091	1.36091	2.63709	2.82361	2.63442	2.96202	2.2914		0.177895	-0.207641	-0.636048	-1.31334	-0.206522	-1.85385	0.741565	1.1209	0.736135	1.40239	0.0385227
Decr2	6.02421	6.00272	6.16613	5.85141	5.49134	5.30708	8.36423	6.61504	6.8657	8.80643	8.18411		-0.554012	-0.571681	-0.437327	-0.696087	-0.992132	-1.14363	1.36993	-0.0682387	0.137851	1.7335	1.22183
Fam118a	7.84242	8.71048	7.70285	5.50203	6.15466	5.61308	9.8063	9.39823	9.16094	9.44059	8.21314		-0.0740387	0.479103	-0.162975	-1.56537	-1.14951	-1.49461	1.17738	0.917348	0.766143	0.944341	0.16219
Ccdc138	0.715488	0.517236	0.518295	0.632687	0.586674	0.562173	0.893604	0.978517	0.618319	0.913112	0.908684		0.0131687	-1.10954	-1.10355	-0.455738	-0.716313	-0.855064	1.02185	1.50272	-0.537105	1.13233	1.10725
Nudt8	11.5576	10.8171	11.0311	9.66626	9.60912	7.92028	14.2228	11.7134	10.814	14.2841	13.5379		0.0889592	-0.280755	-0.17391	-0.855342	-0.88387	-1.72707	1.41963	0.166746	-0.282303	1.45024	1.07768
Neurl3	49.5981	50.1166	46.3237	37.8368	38.8085	34.9669	64.8571	55.4887	55.8122	62.4239	51.8577		-0.0233599	0.0296978	-0.358427	-1.22689	-1.12745	-1.52056	1.53808	0.579421	0.612525	1.2891	0.207864
Hmgb2	58.6869	56.4527	55.4015	45.1843	46.5187	52.2607	59.385	63.4486	58.1454	66.7456	80.6694		0.0246735	-0.203538	-0.310912	-1.35454	-1.21824	-0.631727	0.0959805	0.511055	-0.0306378	0.847825	2.27006
Cdnf	0.57616	1.11071	1.05336	0.650031	0.843627	0.565876	1.25072	0.819489	0.796661	1.19486	0.914669		-1.3024	0.92485	0.685896	-0.994612	-0.187976	-1.34525	1.50821	-0.288549	-0.383664	1.27547	0.108027
4930431P03Rik	1.509	1.63548	2.04182	2.32736	1.82463	1.58087	2.94135	2.6416	2.266	3.75222	2.12254		-1.08911	-0.900739	-0.295551	0.129722	-0.619025	-0.982073	1.04418	0.59774	0.0383349	2.25186	-0.175329
Naip2	3.80427	4.16211	4.13404	4.21488	4.4931	4.17815	5.80453	5.70647	5.73346	6.77033	6.43559		-1.1626	-0.825862	-0.852277	-0.776203	-0.514389	-0.810768	0.719711	0.627434	0.652832	1.62856	1.31356
Dstn	13.8666	14.3883	13.6277	10.3005	10.3956	12.059	17.4517	21.5076	18.6375	16.5017	17.0681		-0.343263	-0.194836	-0.411232	-1.35784	-1.33079	-0.857538	0.676724	1.83066	1.01409	0.406442	0.567587
Tgfbr3l	3.4259	4.1577	4.10212	2.77624	3.64573	1.52079	5.24916	3.50686	2.89038	4.20913	3.93307		-0.163218	0.595291	0.537682	-0.836589	0.0646351	-2.13786	1.72659	-0.0793034	-0.718284	0.648598	0.362462
Plekhm3	3.89095	3.79959	3.78733	3.21205	3.46475	3.08097	4.75053	5.36008	5.56132	5.04752	4.95439		-0.419249	-0.521786	-0.535546	-1.18121	-0.897591	-1.32832	0.545494	1.22962	1.45548	0.878819	0.774295
Dpcd	17.0787	17.4074	13.9447	12.4125	13.612	13.5574	18.2622	19.2251	17.9343	20.268	20.3113		0.122193	0.236887	-0.97136	-1.50599	-1.08745	-1.1065	0.535154	0.871141	0.420739	1.23504	1.25015
Akap17b	1.0287	0.992718	1.21998	0.713411	0.740922	1.0955	1.17304	1.68173	1.44198	1.36274	1.25248		-0.438012	-0.56296	0.226212	-1.53286	-1.43733	-0.206047	0.0632122	1.82965	0.997112	0.72195	0.339069
Pdlim1	64.6484	66.1196	62.0926	53.9012	52.7498	48.7898	75.3899	71.9652	74.2496	81.5226	78.1386		-0.152091	-0.0185769	-0.384034	-1.12742	-1.23191	-1.59129	0.822719	0.511922	0.719235	1.37927	1.07217
Mapre3	4.60592	4.15725	3.87054	3.74036	3.39728	2.61499	6.0512	5.01982	6.38233	5.21825	4.80548		0.0647027	-0.333615	-0.58815	-0.70372	-1.0083	-1.7028	1.34779	0.432153	1.64176	0.608314	0.241867
Cdca3	1.57557	1.04137	1.17394	1.22989	1.51338	0.990366	1.49928	1.72383	1.37975	1.20645	2.63466		0.27245	-0.90233	-0.61079	-0.487748	0.135686	-1.01449	0.104678	0.598494	-0.158185	-0.539296	2.60154
Gm7120	2.86551	2.36209	2.26678	1.3708	2.33538	2.53962	3.58836	3.36537	2.99898	3.39709	3.03594		0.19662	-0.58406	-0.731863	-2.12131	-0.625481	-0.308755	1.31758	0.97178	0.403599	1.02097	0.460915
Top2a	4.39881	3.98989	3.92009	3.41599	3.70614	4.50261	3.11055	3.1084	3.40383	3.11076	8.86676		0.157704	-0.0909297	-0.13337	-0.439876	-0.263457	0.220817	-0.625591	-0.626898	-0.447269	-0.625464	2.87433
Cdkl2	0.669855	0.445958	0.574755	0.468794	0.553523	0.571591	0.674754	0.645787	0.602144	0.801885	0.844883		0.379383	-1.43678	-0.392028	-1.25154	-0.564254	-0.417693	0.419122	0.184154	-0.16986	1.45036	1.79914
Gzmm	89.5861	77.1317	74.3941	72.8998	75.1159	53.5714	85.7923	88.8185	94.8085	103.93	104.582		0.391808	-0.436328	-0.61836	-0.717721	-0.570365	-2.00293	0.139546	0.340768	0.739064	1.34558	1.38894
Insr	1.68016	1.9787	1.67161	1.63942	1.38285	1.45331	2.31932	1.99307	2.52187	2.59566	2.03557		-0.614649	0.108874	-0.635371	-0.713384	-1.33519	-1.16443	0.93438	0.1437	1.42527	1.6041	0.246701
Espn	7.71531	6.40603	6.33281	7.03785	8.158	7.19069	10.071	8.14669	8.85733	12.7313	10.4481		-0.383298	-1.05432	-1.09184	-0.730503	-0.156414	-0.652171	0.824019	-0.162211	0.202	2.18745	1.01729
Dcbld2	0.434683	0.611851	0.55979	0.494833	0.377169	0.261425	0.804289	0.67639	0.511997	0.542419	0.633843		-0.689663	0.50274	0.152351	-0.284832	-1.07675	-1.85575	1.79792	0.93711	-0.169312	0.0354384	0.650754
Sema4f	19.0084	18.558	19.6716	13.8304	13.699	13.8765	23.1972	23.9356	20.8012	21.6071	21.3615		-0.0110611	-0.131742	0.166638	-1.39846	-1.43367	-1.38611	1.11129	1.30914	0.469305	0.68524	0.619433
Tpx2	0.715596	0.717887	0.705268	0.847883	0.874032	0.87739	0.508769	0.618881	0.636057	0.600127	2.10089		-0.277741	-0.272483	-0.301444	0.0258569	0.0858686	0.0935752	-0.752408	-0.499701	-0.460282	-0.542742	2.9015
C030039L03Rik	0.345912	0.632253	0.494165	0.461291	0.464631	0.410735	0.655385	0.716583	0.730113	0.738336	0.651173		-1.6148	0.423319	-0.559565	-0.793556	-0.769782	-1.1534	0.587969	1.02356	1.11987	1.1784	0.557988
Tmem41a	4.39607	4.02284	3.8779	3.7959	3.60021	3.38973	4.81046	5.08734	4.91846	5.21484	6.01171		-0.086256	-0.546945	-0.725848	-0.827063	-1.06861	-1.32841	0.425237	0.766998	0.558545	0.924375	1.90797
D430020J02Rik	0.150524	0.352357	0.353078	0.23867	0.405537	0.512502	0.465514	0.27997	0.364229	0.34578	0.860258		-1.31824	-0.223183	-0.219271	-0.839996	0.0653471	0.64569	0.390755	-0.615921	-0.158771	-0.258867	2.53245
Il4ra	17.169	18.0928	19.7167	21.9702	18.8126	17.6942	30.0573	24.3883	27.8584	29.831	31.1838		-1.12111	-0.953365	-0.658493	-0.249298	-0.822662	-1.02574	1.21918	0.189786	0.819895	1.17808	1.42373
5031439G07Rik	3.69789	3.41577	3.41119	2.90293	2.48363	2.3266	4.17673	4.29112	4.46128	3.95724	4.0977		0.180849	-0.204954	-0.211218	-0.906271	-1.47967	-1.69441	0.83567	0.9921	1.2248	0.535514	0.727595
Ggt1	9.91303	8.9434	11.2176	9.59909	8.85172	9.30333	12.1521	11.3852	9.07112	12.0542	16.9451		-0.39802	-0.80651	0.151575	-0.530278	-0.845133	-0.654877	0.545265	0.222182	-0.752704	0.504021	2.56448
Gm10767	0.977986	0.884953	0.925319	1.05651	0.916473	0.805015	1.39594	1.4063	0.804922	1.78302	1.12377		-0.390079	-0.691957	-0.560975	-0.13528	-0.589679	-0.951344	0.96612	0.999736	-0.951646	2.22214	0.0829685
Neto2	0.780669	0.819021	0.728369	0.53503	0.661894	0.623123	0.769397	0.46367	0.633955	0.882434	1.02294		0.380207	0.620736	0.052201	-1.16035	-0.364705	-0.607862	0.309513	-1.60789	-0.539928	1.01844	1.89964
Nudt2	4.08372	3.11439	3.72758	3.29503	4.4892	4.52503	5.15638	5.29285	6.15333	6.57474	6.31678		-0.587602	-1.39002	-0.882418	-1.24049	-0.251942	-0.222282	0.300355	0.413327	1.12564	1.47449	1.26094
Cdk20	1.90088	1.3731	1.27272	1.9156	1.4893	0.881445	2.49085	2.15476	2.18312	2.67249	1.82051		0.12691	-0.849087	-1.03471	0.154131	-0.634204	-1.75828	1.21791	0.596397	0.648842	1.55381	-0.0217144
Scmh1	0.960926	0.91463	0.791938	0.680721	0.84766	0.730835	1.05619	0.985286	1.21802	1.19876	1.18078		0.00214032	-0.243348	-0.893933	-1.48367	-0.598463	-1.21794	0.507286	0.131311	1.3654	1.26328	1.16794
S100a6	563.102	490.163	471.979	351.669	392.128	422.224	550.505	660.657	567.5	597.668	630.506		0.449867	-0.277807	-0.459219	-1.65949	-1.25585	-0.955598	0.324194	1.42312	0.493744	0.794714	1.12232
Ssc4d	0.260908	0.198978	0.332308	0.332914	0.282113	0.315386	0.248274	0.316201	0.203505	0.368832	0.611739		-0.487027	-1.03891	0.14925	0.154651	-0.298059	-0.00154897	-0.599614	0.00571386	-0.99857	0.474732	2.63938
Mcoln3	2.91784	1.69949	1.88807	2.38893	1.76002	1.37029	2.61697	2.1723	2.62785	2.97902	2.83963		1.12483	-1.08043	-0.739097	0.167482	-0.970873	-1.6763	0.580244	-0.224628	0.599937	1.23557	0.983269
Prkra	1.91064	2.26981	2.15039	1.86431	1.82557	1.8839	2.88761	2.68887	3.039	3.02168	2.85477		-0.973267	-0.258471	-0.496133	-1.06547	-1.14257	-1.02648	0.971033	0.575514	1.27232	1.23785	0.905677
Fam174b	0.388418	0.405355	0.27079	0.299209	0.440616	0.299833	0.330703	0.339974	0.358045	0.542663	0.553879		0.0412556	0.219536	-1.19691	-0.897768	0.590697	-0.891199	-0.566258	-0.468671	-0.278454	1.66485	1.78292
1110019D14Rik	0.351764	0.516663	0.733437	0.533919	0.805783	0.573249	0.781037	0.821044	0.612486	1.15723	0.860402		-1.61862	-0.861451	0.133907	-0.782217	0.466098	-0.601626	0.352472	0.536172	-0.421462	2.07983	0.716891
Aldh5a1	0.780526	0.644861	0.656437	0.752532	0.513744	0.564602	0.946096	1.11423	1.06211	1.04355	0.889008		-0.165869	-0.814002	-0.758698	-0.299609	-1.44041	-1.19744	0.625134	1.42839	1.17939	1.09072	0.352399
Fahd1	2.14411	2.08404	1.48502	1.6819	1.41829	1.4094	2.40033	2.09748	2.17022	2.4466	2.31371		0.444181	0.292431	-1.22083	-0.723464	-1.3894	-1.41186	1.09145	0.326383	0.510141	1.20834	0.872628
Hint2	26.6595	22.8895	19.4743	22.0601	22.2885	22.316	34.0734	34.5442	29.273	35.891	34.522		-0.157211	-0.764415	-1.31447	-0.898	-0.861214	-0.856785	1.03689	1.11272	0.263725	1.32963	1.10914
Tesc	14.1173	11.3993	9.53146	12.705	10.9174	9.33325	16.3682	16.1355	13.5187	15.3228	19.4958		0.185631	-0.675422	-1.26715	-0.261781	-0.828087	-1.32994	0.898709	0.82499	-0.00400345	0.567529	1.88952
Zscan12	2.32838	2.71033	2.1727	2.14309	2.12569	2.15008	3.70033	2.83636	3.13095	3.79861	2.98757		-0.65606	-0.0396783	-0.907292	-0.955076	-0.983156	-0.943796	1.55796	0.163706	0.639108	1.71656	0.407725
Fn3krp	3.74329	4.18463	3.67287	2.92201	2.91021	3.83442	3.90503	4.02878	4.14069	5.15232	5.07099		-0.304977	0.31476	-0.403862	-1.45823	-1.4748	-0.17701	-0.0778587	0.0959131	0.253059	1.67361	1.5594
Klf6	51.0551	51.5211	51.5709	38.1221	38.1475	35.979	60.1798	60.076	63.9896	63.4102	55.328		-0.068669	-0.0233856	-0.0185463	-1.32543	-1.32296	-1.53369	0.818022	0.807935	1.18824	1.13194	0.346549
Klhl5	5.11444	5.73832	4.47808	4.2511	4.37856	5.29187	6.83452	7.7649	7.12997	6.63991	8.09925		-0.619893	-0.170296	-1.07848	-1.24206	-1.1502	-0.492029	0.619678	1.29015	0.832593	0.479433	1.5311
Ldoc1l	1.13802	1.25363	1.32231	1.21563	1.21238	1.12947	1.74406	1.46792	1.78888	2.07916	1.70395		-1.00328	-0.642573	-0.428291	-0.761133	-0.771273	-1.02995	0.887569	0.0260123	1.02741	1.93308	0.762426
Myo6	0.679717	0.567026	0.539049	0.84997	0.674069	0.504685	0.960784	0.849092	0.882059	1.03085	1.12866		-0.517055	-1.05608	-1.1899	0.297303	-0.544071	-1.35427	0.827351	0.293103	0.450792	1.16249	1.63034
Acyp1	28.1351	30.7422	24.2669	20.3396	21.1351	15.6325	27.7482	28.9132	29.2951	33.3768	27.4863		0.390599	0.890335	-0.350868	-1.10366	-0.951181	-2.00593	0.316437	0.539748	0.612951	1.39534	0.266235
Dapk2	8.98409	9.29153	7.52692	7.2211	6.81395	6.12794	9.44085	10.2962	9.44338	9.86535	11.6289		0.119397	0.304214	-0.756574	-0.940416	-1.18517	-1.59756	0.393977	0.908166	0.395497	0.649163	1.70931
Senp8	0.988837	0.906808	0.995206	1.04249	1.13974	0.765963	1.38758	1.09524	1.36414	1.64842	1.49485		-0.653265	-0.955229	-0.62982	-0.455759	-0.0977636	-1.47371	0.814581	-0.261576	0.728294	1.77478	1.20946
Lrrc8b	3.52901	3.6551	3.00628	3.25629	3.0015	3.01393	5.76721	5.27122	4.40223	4.91497	4.98532		-0.530862	-0.407816	-1.04097	-0.796998	-1.04564	-1.03351	1.6533	1.16929	0.321276	0.821637	0.890289
Mvk	3.2254	3.1888	2.22692	2.53223	3.15361	3.16061	4.23805	4.12988	4.0934	4.55228	4.89352		-0.418467	-0.461496	-1.59236	-1.23341	-0.502869	-0.494639	0.772084	0.644911	0.602022	1.14152	1.54271
Enpp5	2.07211	1.58827	2.18611	2.59092	2.09788	2.22744	3.7646	2.08904	2.22167	3.61697	3.77079		-0.636667	-1.2604	-0.489706	0.0321487	-0.603446	-0.436426	1.54518	-0.614842	-0.443864	1.35486	1.55316
Pfkfb4	0.833056	0.864738	0.83114	0.6878	0.690583	0.570632	1.41774	1.02362	1.03373	0.915948	1.16651		-0.329496	-0.197792	-0.337461	-0.933333	-0.921764	-1.42041	2.10107	0.462689	0.504716	0.0150905	1.05669
Zc4h2	1.32703	1.37905	1.3266	1.05053	0.797736	1.28526	1.70934	1.86277	1.47709	1.73824	1.61112		-0.280732	-0.114684	-0.282104	-1.16332	-1.97023	-0.414061	0.939599	1.42935	0.198259	1.03185	0.626082
Gm20594	91.2273	86.9257	75.2065	71.7379	69.2572	46.3747	91.5715	64.3512	90.8355	100.214	100.706		0.621035	0.365711	-0.329887	-0.535767	-0.68301	-2.04121	0.641465	-0.974208	0.597779	1.15444	1.18365
Ust	6.49557	7.3739	5.88382	4.83821	5.57589	5.36342	8.42224	8.5607	8.52439	9.34015	7.58828		-0.386048	0.186428	-0.784773	-1.46628	-0.985475	-1.12396	0.869713	0.959958	0.936292	1.46799	0.326156
Igf2bp2	0.684386	0.588049	0.513707	0.587655	0.602859	0.516226	0.859644	0.802698	0.693957	0.964256	0.869184		-0.091006	-0.715717	-1.1978	-0.718271	-0.619679	-1.18146	1.04548	0.676204	-0.0289415	1.72385	1.10734
Cdc45	1.50298	1.85511	1.89122	1.57622	1.9118	2.42439	1.60122	1.71965	1.93906	1.66781	4.68516		-0.628376	-0.238432	-0.198444	-0.547271	-0.175654	0.391982	-0.519587	-0.388439	-0.145467	-0.445846	2.89553
C1qtnf6	2.01558	2.16676	1.63168	1.54364	1.96183	2.63406	2.4378	2.33948	2.01262	2.15737	4.44326		-0.370504	-0.176303	-0.863649	-0.976742	-0.439549	0.423975	0.171866	0.0455671	-0.374306	-0.188365	2.74801
Acad10	2.32381	2.03811	2.15665	1.64643	1.73379	2.07784	3.18312	2.85016	3.02895	3.00722	2.88236		-0.22316	-0.736377	-0.523438	-1.43997	-1.28304	-0.665008	1.32046	0.722348	1.04352	1.00448	0.78019
Cbr4	4.44133	4.09746	4.5961	4.76699	4.68222	5.05998	7.44878	6.80295	5.27107	8.16201	7.52076		-0.867274	-1.10168	-0.761772	-0.645281	-0.703066	-0.445558	1.18282	0.742577	-0.301664	1.66901	1.23189
Dynlt3	6.40958	6.20312	6.21581	5.77306	5.71462	5.43712	7.67956	7.58622	8.25259	8.71646	9.5794		-0.464018	-0.613238	-0.604066	-0.924065	-0.966303	-1.16687	0.453864	0.386402	0.868023	1.20329	1.82698
Cetn3	40.823	39.0474	38.6443	31.2321	32.5141	32.2228	48.3644	48.481	45.6987	54.5082	49.3847		-0.135931	-0.359642	-0.41043	-1.34431	-1.18279	-1.21949	0.814227	0.828917	0.478369	1.5883	0.942777
Hsd17b11	19.4861	19.155	19.8664	14.6233	15.9779	13.7158	21.8261	22.9779	22.9831	26.2499	21.7688		-0.100978	-0.186843	-0.00235519	-1.36205	-1.01076	-1.59739	0.505854	0.804551	0.805899	1.65308	0.490995
2610015P09Rik	2.4266	2.89991	2.41883	1.93725	2.64607	2.00292	3.37267	2.51012	2.88757	3.78378	3.36199		-0.55643	0.258454	-0.569808	-1.39893	-0.178575	-1.28587	1.07239	-0.412636	0.237209	1.78019	1.054
Diap3	1.37435	1.4635	1.36536	0.938717	0.973086	1.16784	1.33686	1.39006	1.29504	1.24726	2.09454		0.140929	0.434204	0.111355	-1.29216	-1.1791	-0.538423	0.0175989	0.19261	-0.119976	-0.277156	2.51012
Cdk1	0.818814	0.943946	0.924858	0.706057	0.910069	0.797964	0.706684	0.833361	0.737234	0.991514	1.62839		-0.350054	0.135695	0.0615976	-0.787765	0.00418821	-0.430992	-0.785331	-0.293584	-0.666739	0.320349	2.79263
Ass1	30.1612	28.54	28.794	20.7496	23.0497	24.6544	29.9823	33.3483	33.4221	38.7905	35.6496		0.0772029	-0.22006	-0.173487	-1.64851	-1.22676	-0.932524	0.0443998	0.661589	0.675121	1.65947	1.08356
St8sia1	0.460255	0.570385	0.444541	0.348048	0.355827	0.295332	0.591256	0.800667	0.81671	0.581508	0.506595		-0.375283	0.266559	-0.466865	-1.02923	-0.983893	-1.33646	0.388196	1.60865	1.70215	0.331384	-0.105211
Tnfsf8	16.1673	19.9017	19.2804	21.0906	22.8544	18.3509	27.9155	24.0369	26.6966	36.2782	31.6085		-1.28458	-0.673414	-0.775095	-0.478841	-0.19018	-0.927216	0.638112	0.00334607	0.438629	2.00674	1.2425
Cenpw	1.62399	1.27783	1.79263	1.4337	1.30444	1.9849	1.69253	1.96295	1.99601	2.01334	3.14287		-0.418858	-1.09429	-0.0898026	-0.790157	-1.04237	0.28536	-0.285121	0.242531	0.307038	0.340853	2.54482
Pacsin1	1.82088	1.86501	1.61747	1.70834	2.09441	1.59193	2.95874	2.40761	2.5785	3.23217	2.66787		-0.719312	-0.641946	-1.07592	-0.916613	-0.239771	-1.1207	1.27553	0.309317	0.608915	1.7549	0.765594
Tomm7	43.8694	43.2163	40.0353	39.3703	35.7684	39.1089	52.0617	57.5725	57.0268	61.4497	63.5459		-0.455027	-0.519807	-0.83533	-0.901291	-1.25856	-0.927219	0.357565	0.90418	0.850052	1.28876	1.49668
Them4	1.19314	1.71595	1.8658	1.39058	1.64608	1.11108	2.23919	2.17569	1.80252	2.19945	2.35715		-1.38958	-0.173628	0.174894	-0.930375	-0.336132	-1.58044	1.04333	0.895638	0.0277173	0.9509	1.31768
AU041133	1.54018	2.24689	2.09067	1.56375	1.85289	2.00601	2.5945	2.75082	1.97613	3.10244	2.85478		-1.32354	0.0236959	-0.274114	-1.27861	-0.727405	-0.435505	0.686361	0.984361	-0.492467	1.65467	1.18255
Prkar2b	1.29888	1.25418	1.41605	0.985742	0.781401	0.890361	1.3428	1.76848	1.50773	1.47346	1.45274		0.0357604	-0.116009	0.433586	-1.02743	-1.72123	-1.35128	0.184881	1.63019	0.744865	0.628509	0.558159
Naglu	6.69749	6.64251	6.33681	5.36267	6.23453	6.13066	10.3749	8.76404	8.36844	9.95019	9.57036		-0.552521	-0.583575	-0.756245	-1.30647	-0.814016	-0.872685	1.5246	0.614736	0.391288	1.28471	1.07017
Zdhhc1	2.05038	1.77681	2.14258	1.46715	1.56275	1.54658	2.65348	2.27323	2.34366	2.84698	2.19895		-0.061728	-0.664109	0.14129	-1.34596	-1.13545	-1.17106	1.26625	0.428971	0.584053	1.69233	0.265412
Cryl1	3.94206	5.31264	3.61073	3.39635	3.49762	3.07539	5.10798	5.21231	5.41205	5.13793	5.85866		-0.564405	0.807809	-0.896129	-1.11076	-1.00937	-1.43211	0.602905	0.707359	0.907337	0.632891	1.35448
Tcf7l1	0.326161	0.274752	0.487104	0.468023	0.395545	0.422097	0.639003	0.41983	0.583638	0.411357	1.00718		-0.84313	-1.10128	-0.0349437	-0.13076	-0.494714	-0.361381	0.727828	-0.372765	0.449809	-0.415313	2.57665
Orc1	0.0900571	0.317458	0.298226	0.281195	0.489478	0.471731	0.359924	0.3153	0.199236	0.257447	1.11324		-1.08904	-0.238457	-0.310394	-0.374098	0.40498	0.338598	-0.0796137	-0.246529	-0.680663	-0.462927	2.73815
As3mt	23.8004	22.1126	26.8853	14.8654	17.616	19.6252	34.1896	33.5086	33.9336	22.6973	34.822		-0.277752	-0.509496	0.145822	-1.50458	-1.1269	-0.851029	1.14874	1.05524	1.11359	-0.429213	1.23557
Odf2l	2.00959	2.50182	2.14866	1.7722	1.81676	1.71978	2.92561	2.68164	2.49495	3.42301	2.44028		-0.655924	0.271654	-0.393855	-1.10327	-1.0193	-1.20205	1.07026	0.610514	0.258708	2.00758	0.155686
Clec3b	0.898549	1.27264	1.27524	0.87676	0.781887	1.14306	1.09933	1.29208	1.18327	1.57267	1.52157		-1.0914	0.38934	0.399632	-1.17764	-1.55317	-0.123567	-0.296661	0.466288	0.0355931	1.57693	1.37466
Cd99l2	3.20147	3.09024	2.81112	2.09257	2.66469	2.77723	4.09495	4.60278	4.42579	3.96363	4.35901		-0.305151	-0.435364	-0.76212	-1.6033	-0.933541	-0.801794	0.740815	1.33531	1.12812	0.587083	1.04994
Zpbp	1.00013	0.856902	0.843322	0.745464	0.611802	0.523883	1.05745	1.20367	1.02436	1.03529	1.04673		0.458419	-0.227845	-0.292912	-0.76179	-1.40222	-1.82348	0.733063	1.43366	0.574515	0.626885	0.681699
A530072M11Rik	1.41171	1.25085	1.08403	0.808517	0.949047	1.18958	1.69378	1.18191	1.47105	1.75463	1.50707		0.374573	-0.16576	-0.726112	-1.65157	-1.17952	-0.371567	1.32205	-0.397331	0.573897	1.52645	0.694889
Fam46c	38.3269	43.0445	40.3489	25.5806	34.332	33.2134	44.0658	37.1609	43.5812	57.8045	45.2854		-0.233152	0.338958	0.0120588	-1.77891	-0.717619	-0.853273	0.462812	-0.374554	0.404044	2.12892	0.610715
Hsd17b7	2.25683	2.23111	2.38897	1.51324	1.78952	1.74596	2.6101	2.94784	2.65646	2.91859	2.67514		-0.170387	-0.22344	0.102182	-1.70421	-1.13432	-1.22417	0.558312	1.25498	0.65394	1.19464	0.692472
Lyrm1	2.4503	3.58296	2.71965	3.18645	3.22886	2.59054	4.2623	3.75677	3.95892	4.95772	5.03429		-1.30536	-0.0323084	-1.00262	-0.477965	-0.430299	-1.14774	0.731235	0.163045	0.390251	1.51285	1.59891
Wdr78	0.789151	1.02455	1.08887	0.797515	0.739515	0.575762	1.07277	0.875743	0.909304	1.22293	1.12155		-0.717182	0.491057	0.821194	-0.674251	-0.97195	-1.81245	0.738558	-0.272728	-0.100469	1.50929	0.988932
Klhdc9	0.636409	1.40212	0.867786	0.913201	0.561299	0.902032	0.997446	1.11407	0.897222	1.33773	1.29954		-1.30588	1.49407	-0.459812	-0.293744	-1.58053	-0.334586	0.0143112	0.440766	-0.352174	1.25861	1.11897
Kctd7	0.759514	0.713226	0.838381	0.583158	0.700074	0.860907	0.81752	1.12251	1.12479	1.1568	1.22288		-0.642907	-0.854768	-0.281932	-1.45009	-0.914965	-0.17883	-0.377413	1.01853	1.02897	1.17548	1.47793
Gsto1	11.8908	13.0405	12.0755	11.2931	13.2725	14.4503	15.489	18.8265	17.9761	23.6868	19.688		-0.940575	-0.64967	-0.893841	-1.09181	-0.590968	-0.292954	-0.0301354	0.81434	0.599166	2.04412	1.03232
Gpt	4.08925	4.32447	3.10555	2.6175	2.97367	2.60468	3.51768	3.86558	3.76949	3.841	5.29038		0.567794	0.86265	-0.665307	-1.27709	-0.830623	-1.29316	-0.148688	0.287416	0.166964	0.256604	2.07345
Tulp3	1.13278	1.30058	1.28563	1.0119	0.95687	1.23687	1.47266	1.06132	1.51482	1.6452	1.93171		-0.641019	-0.074833	-0.125277	-1.04889	-1.23457	-0.289802	0.505795	-0.882138	0.64805	1.08797	2.05471
Zbtb18	4.05184	4.53529	4.27235	4.45541	3.94135	3.16241	5.58881	5.29849	6.46994	6.09111	6.81372		-0.790894	-0.374896	-0.60115	-0.443631	-0.885968	-1.55623	0.531633	0.281819	1.28982	0.963851	1.58564
Arhgef39	1.92602	1.45374	1.73231	1.46169	1.23668	1.53199	2.13821	2.62236	2.00556	2.36697	2.35549		0.0720199	-0.981328	-0.36002	-0.963597	-1.46545	-0.806803	0.545277	1.6251	0.249422	1.05549	1.02989
Zfp931	1.25236	1.59182	1.45329	0.783325	1.23377	1.24472	1.77229	1.40533	1.50964	2.06545	1.57692		-0.580085	0.445054	0.0267056	-1.99653	-0.636225	-0.603157	0.990057	-0.118129	0.196878	1.87537	0.400057
Cxadr	0.819695	1.06282	0.682942	0.700519	0.925981	0.750568	1.34009	1.05123	1.17573	1.59164	1.06365		-0.692566	0.169627	-1.17753	-1.1152	-0.315644	-0.937711	1.15291	0.128526	0.57004	2.04498	0.172571
Mfsd9	0.651931	0.737055	0.776439	0.703082	0.401925	0.718926	1.11012	0.735801	0.806542	0.963368	1.0749		-0.683994	-0.25952	-0.0631296	-0.428927	-1.93066	-0.349921	1.60078	-0.265773	0.0869802	0.869	1.42516
Tbc1d7	2.93865	2.91657	2.6509	3.06089	3.34153	2.97581	4.93858	3.42286	2.78881	5.17243	5.31293		-0.640154	-0.661765	-0.921781	-0.520516	-0.245848	-0.603785	1.31722	-0.166249	-0.786806	1.54609	1.6836
Enkd1	2.82809	2.4923	2.96567	2.20761	2.03183	1.97519	3.45364	2.68165	3.17179	2.45428	4.50962		0.0418625	-0.416537	0.229678	-0.805177	-1.04514	-1.12246	0.895823	-0.158048	0.51106	-0.468439	2.33738
Crip1	717.813	635.061	621.428	485.756	457.739	496.682	732.168	860.364	774.489	805.533	810.226		0.317492	-0.262041	-0.357517	-1.30766	-1.50387	-1.23114	0.418024	1.31581	0.714408	0.931817	0.964684
Cep290	0.946441	0.864059	1.02325	0.613552	0.838314	0.828527	1.43111	1.18586	1.23097	1.3303	1.22944		-0.400006	-0.726285	-0.0957998	-1.71843	-0.82825	-0.867012	1.51955	0.548227	0.726888	1.12029	0.720828
Mturn	7.17905	7.61118	7.51238	5.32806	4.58904	5.29553	9.86768	10.1515	10.137	10.1391	6.94819		-0.249311	-0.0446038	-0.091407	-1.12615	-1.47624	-1.14156	1.02434	1.15879	1.15192	1.15291	-0.358673
Rftn2	1.25275	1.25164	0.916529	0.810176	0.941894	0.991941	1.42773	1.51726	1.57105	1.68057	1.40602		0.00388455	0.000146933	-1.12825	-1.48636	-1.04284	-0.874317	0.593081	0.894548	1.07567	1.44445	0.519979
Aldh6a1	3.31699	3.81359	4.14132	2.67095	3.15363	3.27255	5.48535	4.90459	5.09109	5.573	4.66254		-0.861231	-0.371107	-0.0476504	-1.49885	-1.02246	-0.905091	1.27885	0.705666	0.889734	1.36536	0.466773
Atp2b1	52.5333	54.4028	59.1248	33.1469	38.7318	39.9874	68.1813	66.281	63.5844	62.9466	63.3116		-0.181023	-0.02824	0.35766	-1.76535	-1.30893	-1.20632	1.09779	0.942492	0.722115	0.669992	0.699821
Mboat1	4.60985	5.78574	4.35861	4.16624	4.65628	4.07728	6.61589	6.61459	5.76453	7.77345	6.83037		-0.754628	0.171065	-0.952411	-1.10385	-0.718077	-1.17388	0.824582	0.823559	0.154368	1.73585	0.993427
Tmem216	3.55993	4.89669	4.30259	3.50614	2.92446	3.47227	4.39949	5.99991	5.77742	6.90714	4.31594		-0.80137	0.279425	-0.200916	-0.84486	-1.31516	-0.872245	-0.122571	1.1714	0.991511	1.90491	-0.190122
P3h4	0.942786	0.871049	1.74566	0.919924	0.940486	1.40188	1.67851	1.83674	1.42975	0.993604	2.70371		-0.820657	-0.947798	0.602292	-0.861175	-0.824733	-0.00699567	0.483281	0.763715	0.0423989	-0.730591	2.30026
Gatsl2	2.02706	2.3802	2.43425	1.59754	1.91	1.84356	3.37027	2.7491	2.95683	2.9224	3.15907		-0.779233	-0.180145	-0.0884518	-1.5079	-0.977821	-1.09053	1.49947	0.445678	0.798084	0.739675	1.14118
Tmem171	1.22318	0.761591	1.29148	0.882162	0.797384	1.11429	1.72061	1.30336	1.12753	1.19453	1.98122		0.0141819	-1.23503	0.199024	-0.908723	-1.13816	-0.28051	1.36039	0.231175	-0.244678	-0.0633543	2.06568
Cpne2	1.32587	1.22156	1.11762	1.01145	0.90362	1.13647	1.58282	1.54031	1.39997	1.57518	1.8982		-0.0395372	-0.392575	-0.74436	-1.10369	-1.46864	-0.680563	0.830111	0.686236	0.211255	0.804254	1.89752
Dlg4	4.11478	4.80554	4.6019	3.54078	4.35918	3.27771	5.78572	5.13564	5.77913	5.52621	7.2196		-0.711986	-0.103008	-0.282538	-1.21803	-0.496521	-1.44995	0.761125	0.188011	0.755315	0.532339	2.02524
Fam101b	13.5196	16.4261	12.4587	13.8334	15.8509	12.1928	24.0999	14.9792	19.4549	26.2633	21.4951		-0.788513	-0.186244	-1.00835	-0.723489	-0.305434	-1.06344	1.40388	-0.486063	0.441367	1.85216	0.864125
Lyrm7	1.5613	1.88908	1.86469	0.774209	1.58303	1.26026	1.94846	2.06106	2.12343	2.09054	2.03706		-0.437263	0.343682	0.285572	-2.31253	-0.385491	-1.1545	0.485156	0.753429	0.902027	0.823666	0.696248
Ccdc28a	10.1992	8.80294	8.64685	6.36102	7.04513	8.48191	14.2579	12.5165	9.40171	13.58	11.4843		0.049517	-0.488435	-0.548574	-1.42926	-1.16569	-0.612122	1.61326	0.942328	-0.257741	1.35207	0.544641
Sema6c	0.406641	0.441376	0.529447	0.238236	0.480983	0.32649	0.395378	0.656866	0.718339	0.649719	0.547781		-0.564245	-0.32945	0.265874	-1.7026	-0.0617231	-1.10603	-0.640378	1.12718	1.54271	1.07886	0.389804
Ly6g5b	3.0904	2.48778	1.90246	2.31958	2.33909	1.68105	1.80969	3.53725	2.73918	3.64061	3.62295		0.599445	-0.224211	-1.02422	-0.454105	-0.427439	-1.32684	-1.15102	1.2102	0.1194	1.35147	1.32733
Camk2n1	8.90164	7.45248	9.3838	6.81833	5.86703	6.31032	10.9694	11.3755	11.6656	11.5421	10.225		-0.106777	-0.76316	0.111613	-1.05039	-1.48127	-1.28049	0.829795	1.01373	1.14513	1.08919	0.492626
Cyp4f16	3.04023	2.3557	2.58804	2.53913	2.00396	3.07706	3.72659	3.6984	3.79999	4.39291	4.34107		-0.2374	-1.08038	-0.79426	-0.854491	-1.51354	-0.192045	0.607834	0.573119	0.698224	1.42839	1.36455
Spata6	9.25944	9.45188	8.84648	6.49453	7.21319	7.09152	11.8486	11.8497	12.0622	11.8805	11.9609		-0.251273	-0.164148	-0.438235	-1.50305	-1.17769	-1.23277	0.920935	0.921433	1.01764	0.935378	0.971778
Mccc2	3.08197	3.308	2.67508	2.6988	2.78939	2.1801	4.63723	4.3807	4.03079	5.05607	3.7469		-0.45875	-0.215206	-0.897168	-0.87161	-0.774001	-1.4305	1.21702	0.940613	0.56359	1.66831	0.257702
Arl13b	4.46349	4.49738	4.11983	3.53772	3.24056	3.11206	5.27658	5.8402	6.10851	5.78578	5.58489		-0.204757	-0.173836	-0.518308	-1.04942	-1.32054	-1.43778	0.537095	1.05133	1.29614	1.00168	0.818393
Camkmt	1.63808	1.62404	1.58216	1.15881	1.34317	1.37288	2.49402	1.86391	2.86898	2.13235	2.32311		-0.403157	-0.429289	-0.507239	-1.29521	-0.952064	-0.896766	1.18998	0.0171745	1.88788	0.516814	0.87187
Coq4	1.9856	2.15605	1.44031	1.4946	1.78096	1.15895	1.83546	2.01106	1.46426	2.7802	2.32961		0.274857	0.64177	-0.898941	-0.782076	-0.165653	-1.5046	-0.048336	0.329663	-0.847386	1.98532	1.01538
Scrn3	4.73684	4.5589	4.38477	3.14618	3.36422	2.85558	5.9625	5.3535	5.00991	6.10883	4.68605		0.163509	-0.00163513	-0.163244	-1.31277	-1.11041	-1.58247	1.30103	0.735826	0.416943	1.43684	0.116372
Zfp583	0.355474	0.630886	0.479583	0.385393	0.481167	0.413782	0.41343	0.587707	0.691764	0.625042	0.852756		-1.18859	0.605771	-0.379996	-0.993661	-0.369676	-0.808701	-0.810995	0.324452	1.0024	0.567696	2.05129
Rab32	0.902166	0.662541	0.84496	1.01367	0.742946	0.572808	1.19667	1.14858	0.957624	1.53514	1.15734		-0.266695	-1.1339	-0.473725	0.13684	-0.842916	-1.45865	0.799121	0.625082	-0.0659916	2.02405	0.656785
Rsph1	0.843806	0.697143	0.814997	0.566049	0.444787	0.607746	0.702578	0.830886	0.680596	1.02303	0.84839		0.692078	-0.221715	0.512582	-1.0385	-1.79403	-0.778708	-0.187851	0.611579	-0.324812	1.80874	0.720639
Tcn2	6.38342	5.91911	6.2287	5.74489	4.65345	5.14341	8.9865	8.39346	8.011	9.40114	8.6097		-0.394849	-0.672734	-0.487448	-0.777003	-1.43022	-1.13698	1.16307	0.808141	0.579242	1.41123	0.937558
Tmem14a	1.79251	1.80901	1.91181	1.38288	1.32636	1.54402	2.62361	2.74289	1.89126	3.06174	1.87312		-0.358801	-0.32975	-0.148748	-1.08004	-1.17956	-0.796321	1.10453	1.31455	-0.184931	1.87595	-0.21687
Ccdc91	5.51738	4.57075	4.95146	4.61763	4.70796	3.75945	6.72283	5.67339	6.28508	7.78554	7.42496		-0.0938997	-0.831701	-0.534977	-0.795163	-0.72476	-1.46403	0.845625	0.0276941	0.504444	1.6739	1.39286
Nek4	0.988276	1.01461	0.958535	0.686044	0.984102	0.671441	1.47552	1.46348	1.362	1.27405	1.4486		-0.441794	-0.353876	-0.541088	-1.45083	-0.45573	-1.49958	1.18492	1.14472	0.80592	0.512291	1.09504
Kif3a	0.531161	0.469129	0.490373	0.395778	0.380102	0.273757	0.624908	0.770091	0.747795	0.632448	0.58873		-0.0361688	-0.437461	-0.300031	-0.911977	-1.01339	-1.70135	0.570292	1.5095	1.36526	0.619069	0.336252
Isoc2b	8.34115	7.24725	7.39176	5.55966	6.33027	6.15381	10.1731	9.46023	8.44697	10.1953	10.7924		0.0837754	-0.523216	-0.443029	-1.45964	-1.03204	-1.12995	1.1003	0.704739	0.142494	1.11262	1.44394
Ift80	3.2147	3.48391	3.04568	2.36208	2.52464	2.37246	4.02504	3.32638	4.13905	4.53116	3.92295		-0.193702	0.16789	-0.420722	-1.33891	-1.12056	-1.32496	0.894713	-0.0436978	1.04785	1.57451	0.75759
Prrg1	0.929501	1.15946	1.01835	0.98702	0.90947	0.744653	1.46107	1.40829	1.26347	1.46291	1.62028		-0.879996	-0.0675788	-0.566103	-0.676788	-0.950763	-1.53304	0.997972	0.811507	0.299876	1.00447	1.56044
Pafah2	0.435138	0.427516	0.344488	0.605462	0.438683	0.22322	0.681951	0.622206	0.471587	0.613016	0.869455		-0.48212	-0.52484	-0.990198	0.472518	-0.46225	-1.66988	0.901226	0.566365	-0.277829	0.514857	1.95215
Pcsk4	0.941459	0.868266	0.942547	0.854538	0.861726	1.03217	1.22922	1.20731	1.49349	1.56474	1.64984		-0.693877	-0.937912	-0.69025	-0.983682	-0.959717	-0.391436	0.265552	0.192501	1.14666	1.38421	1.66795
Mvb12b	3.6631	3.67472	3.09961	2.80174	2.57205	2.82011	4.44003	4.2411	4.65143	5.16259	4.4243		-0.131397	-0.118033	-0.779496	-1.12209	-1.38627	-1.10096	0.76219	0.53339	1.00533	1.59324	0.744098
Smyd2	7.07557	6.60132	5.73816	6.76309	6.69819	6.54271	9.20626	8.5629	10.5488	11.3519	12.0732		-0.550516	-0.765949	-1.15805	-0.692463	-0.721945	-0.792573	0.417373	0.12512	1.02724	1.39205	1.71971
Ift88	0.545342	0.794527	1.02917	0.600778	0.807775	0.589744	0.98765	1.06244	1.3135	1.14947	1.19156		-1.40208	-0.458556	0.429902	-1.19217	-0.408394	-1.23395	0.272689	0.555876	1.5065	0.885408	1.04478
Prr22	0.706119	0.87508	0.487151	0.602871	0.620349	0.416109	1.42784	0.270397	0.854311	1.03633	0.896785		-0.120086	0.403788	-0.79901	-0.440212	-0.386021	-1.01928	2.11766	-1.47107	0.339393	0.903754	0.471086
Glce	1.96768	1.94072	2.14674	1.51811	1.87608	2.08536	2.81948	3.05402	2.65745	3.37548	3.08984		-0.729409	-0.773677	-0.435396	-1.46759	-0.879814	-0.536181	0.669229	1.05434	0.403179	1.58217	1.11315
Shf	1.27	1.5636	1.15448	1.02052	0.980098	1.05656	1.59949	1.60202	1.20512	1.86867	1.73943		-0.315701	0.619711	-0.683748	-1.11055	-1.23933	-0.995722	0.734056	0.742117	-0.522409	1.59167	1.17991
Chaf1a	1.48274	1.25643	1.81656	1.2719	2.32089	2.47513	1.81407	1.99663	1.33676	1.64691	5.53207		-0.497773	-0.684395	-0.222495	-0.671638	0.193391	0.320582	-0.224548	-0.0740038	-0.618153	-0.362394	2.84143
Ctif	0.228507	0.214428	0.298945	0.33032	0.285513	0.354652	0.547631	0.459276	0.397873	0.527081	0.623411		-1.176	-1.27983	-0.656528	-0.425141	-0.755588	-0.245695	1.17751	0.525897	0.0730557	1.02595	1.73638
Bnip3	0.977627	1.54361	1.33094	1.1765	1.1299	1.02419	1.64351	1.82548	2.01264	2.12933	1.82102		-1.30826	0.0814671	-0.440727	-0.819943	-0.934365	-1.19393	0.326764	0.773577	1.23313	1.51966	0.762626
Prss36	0.265538	0.390016	0.332192	0.276372	0.381549	0.222547	0.353751	0.356377	0.391638	0.415695	0.629511		-0.933907	0.234691	-0.30816	-0.832198	0.155203	-1.33751	-0.105764	-0.0811114	0.249919	0.475766	2.48307
Mical2	1.0092	0.829851	0.792878	0.792581	0.548131	0.465712	0.838607	1.14681	0.956152	0.994211	1.15556		0.65084	-0.166212	-0.334648	-0.336001	-1.44963	-1.8251	-0.126322	1.27774	0.409172	0.582556	1.31761
Tmem231	1.30069	1.22516	1.10282	0.735738	0.953905	1.00717	1.77584	1.41896	1.12948	1.71288	1.50028		0.12588	-0.109318	-0.49028	-1.63336	-0.953996	-0.788131	1.60548	0.494168	-0.407262	1.40942	0.747396
Ssbp2	2.53986	2.47888	2.15713	1.86763	1.98125	1.87822	2.79909	2.78805	3.41236	3.63529	3.20459		-0.118164	-0.216762	-0.736998	-1.20509	-1.02138	-1.18797	0.300983	0.283133	1.29258	1.65303	0.956634
Mthfs	7.26345	7.80374	5.24614	4.98737	5.12596	5.16687	7.59437	9.18312	7.43943	9.15525	9.11085		0.0971956	0.414343	-1.08695	-1.23885	-1.1575	-1.13349	0.291444	1.22403	0.200495	1.20767	1.18161
Ttc23	0.386234	0.506979	0.513005	0.276439	0.401689	0.26645	0.92685	0.502405	0.416618	0.410628	0.718984		-0.50954	0.118431	0.149771	-1.08056	-0.429162	-1.13251	2.3021	0.0946424	-0.351519	-0.382672	1.22103
Ntrk3	0.250929	0.377237	0.42653	0.335827	0.230126	0.441546	0.499939	0.696555	0.351582	0.692066	0.517342		-1.20481	-0.392	-0.0747932	-0.658479	-1.33868	0.0218367	0.397603	1.66285	-0.557093	1.63397	0.509594
Gm14124	0.251622	0.138592	0.218232	0.280595	0.303166	0.263606	0.307849	0.377554	0.281649	0.440397	0.578261		-0.520357	-1.48071	-0.804054	-0.274188	-0.0824136	-0.418535	-0.0426246	0.549623	-0.265233	1.08357	2.25493
Klf7	6.89262	7.5435	8.39882	5.32798	5.57831	5.29845	9.36979	8.85357	9.15916	10.2358	9.24641		-0.512562	-0.148698	0.329454	-1.38725	-1.24731	-1.40376	0.87226	0.583675	0.75451	1.35639	0.803286
Zfp395	9.19795	10.3815	9.58437	6.16718	7.12397	7.29283	12.5071	11.3063	11.0501	12.3928	12.3731		-0.327939	0.192742	-0.157941	-1.66127	-1.24035	-1.16606	1.12786	0.599591	0.48688	1.07758	1.06891
Bmyc	6.35168	4.46053	4.38202	5.11307	4.68734	5.57289	7.85735	7.57481	7.53833	9.80836	8.739		-0.10813	-1.12278	-1.1649	-0.772676	-1.00109	-0.525971	0.699702	0.548112	0.528539	1.74647	1.17273
Immp2l	1.12629	0.945295	1.12483	0.941978	0.653371	1.01137	1.5821	1.5022	1.18653	1.42369	1.72557		-0.23504	-0.79611	-0.239566	-0.806392	-1.70105	-0.591283	1.17793	0.930251	-0.0483007	0.686876	1.62268
2610035D17Rik	4.15313	5.55781	5.2296	4.29256	4.92975	4.54431	8.13824	6.3817	7.11794	8.92015	7.70998		-1.16269	-0.318882	-0.516041	-1.07893	-0.696163	-0.927701	1.23121	0.176037	0.618303	1.70091	0.973947
Spef2	1.65828	2.64164	1.98398	1.37229	1.50042	1.88892	2.70248	2.43283	2.95641	3.46004	2.31733		-0.931671	0.578449	-0.431502	-1.37086	-1.17409	-0.577483	0.67188	0.257785	1.06183	1.83525	0.0804149
BC021614	52.8299	41.2817	41.7218	27.0317	32.7028	35.7724	52.213	56.7672	61.9623	58.4324	57.458		0.481961	-0.490526	-0.453465	-1.69053	-1.21296	-0.95447	0.430011	0.813525	1.25101	0.953754	0.871698
Gpr19	2.41446	1.96366	2.1364	1.58761	1.72858	2.19959	3.59902	2.76669	2.17861	3.46093	3.25685		-0.0960308	-0.745385	-0.496562	-1.28707	-1.08401	-0.40554	1.61027	0.411339	-0.435761	1.41136	1.11739
Hacl1	3.05887	3.16188	3.21461	2.24874	2.78794	2.28269	4.40599	4.6212	3.95914	4.42782	4.50568		-0.50768	-0.393246	-0.334669	-1.40765	-0.808656	-1.36994	0.988835	1.22791	0.49243	1.01309	1.09958
Frs3	0.445257	0.346227	0.433669	0.357791	0.392707	0.27439	0.423696	0.458499	0.555304	0.588297	0.665277		-0.0343821	-0.899618	-0.135628	-0.798582	-0.493517	-1.52727	-0.222763	0.0813147	0.92711	1.21537	1.88796
Aqp3	10.511	13.1154	8.45113	6.42588	8.32981	9.04036	16.7317	15.305	15.2214	15.5671	13.5689		-0.422619	0.304695	-0.997865	-1.56344	-1.03175	-0.833315	1.31459	0.91617	0.892823	0.989364	0.43134
Ephb6	0.66847	0.595861	1.05291	0.555555	0.573576	0.55174	0.987986	1.10795	0.957075	1.00195	1.05971		-0.682232	-0.991902	0.957362	-1.1638	-1.08694	-1.18007	0.680468	1.1921	0.548636	0.740023	0.986363
1110032A03Rik	0.99357	1.80063	1.62742	0.906929	1.32153	1.1752	2.1044	1.90762	1.50677	2.35603	1.81815		-1.29989	0.451518	0.0756326	-1.48792	-0.588184	-0.905737	1.11073	0.683699	-0.186192	1.6568	0.489539
Efcab7	1.59713	1.31091	0.864205	1.00838	1.2619	0.91862	1.84759	1.20606	1.67432	1.98232	1.93559		0.435901	-0.263801	-1.35583	-1.00338	-0.383613	-1.22281	1.04818	-0.520121	0.624603	1.37755	1.26331
Zmat1	2.72887	3.66472	3.21531	2.36352	2.87329	2.28065	4.37651	4.44158	3.50472	5.08696	4.15368		-0.85657	0.160218	-0.32806	-1.25352	-0.69966	-1.34356	0.933569	1.00427	-0.0136196	1.70546	0.691467
LOC100504703	4.79255	3.95954	4.4085	4.67633	5.98814	2.9288	7.60079	6.29222	5.52224	7.33955	9.46809		-0.497039	-0.940997	-0.701721	-0.558979	0.140157	-1.49034	0.999628	0.302218	-0.108147	0.860399	1.99482
AA474331	3.33077	3.66913	3.19287	2.22369	2.87486	2.93845	5.67171	3.60584	3.55511	5.63786	4.30436		-0.364407	-0.0537674	-0.491009	-1.38079	-0.782966	-0.724585	1.78475	-0.111872	-0.158446	1.75367	0.52942
Amacr	0.789251	0.775434	0.96539	0.874181	0.739609	0.670411	1.29908	0.914862	1.59271	1.50271	1.33649		-0.767506	-0.809492	-0.232276	-0.509431	-0.918352	-1.12862	0.781701	-0.385815	1.67395	1.40047	0.895378
Mcee	6.47607	5.43538	6.46772	3.91178	3.56418	4.84607	7.53191	8.27761	8.14907	7.7663	7.57198		0.066494	-0.548018	0.0615634	-1.44768	-1.65293	-0.895997	0.689952	1.13028	1.05438	0.828356	0.713613
Cyp2u1	0.475562	0.288129	0.262472	0.348022	0.245108	0.274016	0.452533	0.353812	0.394538	0.704023	0.382516		0.726057	-0.699004	-0.894076	-0.243635	-1.02609	-0.806306	0.550966	-0.199614	0.110028	2.46306	0.018624
Zfp358	2.95848	3.75563	3.07908	2.2819	2.21792	2.50903	4.3703	3.23071	3.76605	4.34379	4.43723		-0.481664	0.476742	-0.336668	-1.29511	-1.37203	-1.02203	1.21575	-0.154364	0.48927	1.18388	1.29622
Pctp	2.46153	2.49088	2.9383	2.12256	2.62858	1.94907	4.84809	3.85811	3.16612	4.67562	3.78052		-0.71922	-0.689612	-0.238263	-1.06117	-0.550703	-1.23618	1.6883	0.689624	-0.00844258	1.51431	0.611353
Cacna2d4	1.58079	1.73142	1.33612	1.24278	1.2782	1.13559	2.53573	2.06359	2.33149	2.22262	2.39386		-0.429694	-0.140685	-0.899135	-1.07822	-1.01026	-1.28389	1.40252	0.496639	1.01065	0.801764	1.13032
Eid2	2.75274	3.03237	3.8626	2.95914	2.49215	2.93272	4.79491	4.36961	3.82773	6.24016	4.34535		-0.92405	-0.673169	0.0717033	-0.738871	-1.15785	-0.762574	0.908161	0.526587	0.0404183	2.20482	0.504821
Klhl3	1.82679	2.32859	1.84364	1.40053	1.63852	1.20296	2.70683	2.05579	2.54997	2.87757	2.49683		-0.46781	0.443562	-0.437207	-1.24198	-0.809746	-1.60081	1.13052	-0.0518989	0.845633	1.44062	0.74912
Inpp4b	8.79511	10.2055	8.84186	7.96324	9.05634	9.3705	12.5938	12.2144	14.4898	16.2572	17.1834		-0.849462	-0.413438	-0.835009	-1.10664	-0.768703	-0.67158	0.324908	0.207616	0.91106	1.45745	1.74379
Pdk2	4.07752	3.9235	3.33502	2.66042	2.46297	3.73132	5.82011	5.22445	5.57009	5.6928	5.55289		-0.231717	-0.35446	-0.823438	-1.36105	-1.5184	-0.507614	1.15701	0.682308	0.95776	1.05555	0.944053
Nenf	3.56475	2.45429	1.47559	2.06524	2.29662	2.56749	3.07412	3.70518	1.84838	3.52576	5.28185		0.618246	-0.408809	-1.314	-0.768637	-0.554636	-0.304111	0.164467	0.748128	-0.969209	0.582184	2.20638
Vim	349.129	324.233	313.251	241.903	267.388	296.324	442.383	499.007	460.72	476.353	547.959		-0.329042	-0.567284	-0.672375	-1.35514	-1.11126	-0.834358	0.563348	1.10521	0.738823	0.888422	1.57365
Cdkn2a	0.488316	0.153691	0.259252	0.544541	0.39223	0.438489	0.544819	0.244235	0.342805	0.213667	1.53566		0.0513647	-0.833073	-0.554068	0.199971	-0.202597	-0.0803316	0.200706	-0.593759	-0.333231	-0.674552	2.81957
Macrod1	9.20846	8.16714	7.19345	6.81951	7.12468	6.23346	12.7169	12.3173	11.492	15.1389	10.5554		-0.176627	-0.533188	-0.866592	-0.994633	-0.890139	-1.1953	1.02471	0.887879	0.605286	1.85403	0.284582
Tiam2	0.668309	0.569959	0.689934	0.357603	0.545464	0.338631	0.656461	0.584956	0.536539	0.748335	0.839639		0.488672	-0.15955	0.631201	-1.55918	-0.320996	-1.68422	0.410582	-0.0607052	-0.37982	1.01612	1.6179
Alox5ap	0.686829	0.150773	0.344616	0.333883	0.409596	0.286782	0.260488	0.419307	0.40291	0.419229	0.898718		1.29047	-1.29601	-0.360716	-0.412503	-0.0471865	-0.639766	-0.766635	-0.000330733	-0.0794465	-0.000707084	2.31283
Trim2	0.583682	0.355906	0.613235	0.421821	0.448119	0.561536	0.823091	0.646299	0.635278	0.883105	0.952651		-0.240125	-1.43334	-0.085311	-1.08804	-0.950277	-0.356138	1.01403	0.087896	0.0301621	1.32841	1.69273
Kif11	0.95344	0.724341	0.8226	0.566747	0.616187	0.746267	0.688275	0.882487	1.00011	0.682521	1.80009		0.269151	-0.40591	-0.116381	-0.870275	-0.724595	-0.341303	-0.512182	0.0600815	0.406668	-0.529136	2.76388
Hexim2	0.498721	0.723096	0.823333	0.378491	0.53124	0.718935	0.539446	0.898714	0.925894	0.958468	1.14259		-1.02846	-0.0716676	0.35577	-1.54116	-0.889793	-0.0894112	-0.854801	0.677215	0.793118	0.932022	1.71717
Tbc1d32	0.366651	0.538529	0.396787	0.3297	0.41096	0.150633	0.738839	0.515991	0.709096	0.587197	0.566089		-0.671947	0.322659	-0.497559	-0.885771	-0.415544	-1.92198	1.48179	0.192239	1.30968	0.604287	0.482141
Mybl2	0.592802	0.509675	0.638398	0.493779	0.406475	0.560446	0.605372	0.746662	0.786351	0.619993	1.27315		-0.280386	-0.640333	-0.0829508	-0.709164	-1.0872	-0.42049	-0.225956	0.385842	0.557699	-0.162646	2.66558
Il6ra	2.65851	3.81602	2.95235	2.43683	2.31011	2.65009	5.24353	4.62567	4.29231	5.34625	4.2699		-0.908713	0.109981	-0.650112	-1.10381	-1.21533	-0.916123	1.36629	0.822533	0.529151	1.4567	0.509429
Cenpe	0.49187	0.563803	0.564957	0.4994	0.747459	0.501369	0.385827	0.517792	0.435027	0.475038	1.80089		-0.359718	-0.178754	-0.175851	-0.340774	0.283275	-0.335821	-0.626493	-0.294505	-0.502719	-0.402063	2.93342
Dnase1l3	0.72355	0.175351	0.319473	0.494203	0.230534	0.242563	0.468189	0.49398	0.453541	0.354586	0.906671		1.28525	-1.21775	-0.559707	0.238085	-0.965789	-0.910867	0.119309	0.237067	0.0524285	-0.399386	2.12135
Smco4	5.93801	6.6164	6.78062	5.66082	5.56452	4.79074	7.7288	7.76625	8.24198	10.9404	9.9974		-0.700842	-0.345257	-0.259179	-0.846134	-0.896611	-1.3022	0.237819	0.257449	0.506808	1.92121	1.42693
Ryk	2.41637	1.80508	2.13879	1.64822	2.21273	2.04129	2.81562	2.91352	3.09625	3.88104	3.83989		-0.265771	-1.06762	-0.629881	-1.27337	-0.532892	-0.757774	0.257936	0.386354	0.626046	1.65548	1.6015
Tnnt1	0.256063	1.2694	0.706658	0.624657	0.479928	0.335328	0.6701	0.560335	1.23927	0.915053	0.97566		-1.4094	1.60265	-0.0700445	-0.313785	-0.743978	-1.17379	-0.17871	-0.504976	1.5131	0.54939	0.729539
Samd3	38.5541	42.5515	36.2878	31.2422	35.7331	28.3683	54.4917	52.7797	58.4581	63.7227	61.6466		-0.568233	-0.254893	-0.74588	-1.14139	-0.789361	-1.36666	0.681054	0.546857	0.991965	1.40464	1.2419
Ift74	1.25201	0.833262	1.03652	0.712629	0.782174	0.874425	1.68779	1.14152	1.56285	1.62445	1.50174		0.190639	-0.960639	-0.401815	-1.2923	-1.1011	-0.847468	1.38874	-0.113135	1.04524	1.2146	0.87723
Ift122	0.379976	0.331845	0.332395	0.178989	0.331391	0.246984	0.473606	0.424168	0.507279	0.414698	0.587815		-0.0229032	-0.435209	-0.430498	-1.74462	-0.439098	-1.16216	0.779162	0.35566	1.06762	0.274537	1.75751
Gstm4	1.68267	1.59727	1.29736	1.38112	1.32899	0.904488	1.90571	2.24853	1.89388	2.188	2.60646		-0.0959439	-0.267584	-0.870356	-0.702011	-0.806784	-1.65997	0.352331	1.04134	0.328554	0.919689	1.76073
Ampd3	0.522646	0.516689	0.606503	0.523048	0.477215	0.379061	0.943664	0.785894	0.72884	0.889338	0.941758		-0.706228	-0.735787	-0.290116	-0.704233	-0.931663	-1.41872	1.38293	0.60005	0.316939	1.11336	1.37347
Chchd6	1.42622	1.75264	1.21102	1.07096	1.18232	1.45583	1.77474	1.34436	2.27543	2.74454	2.18287		-0.467745	0.146889	-0.872956	-1.13668	-0.926997	-0.41199	0.188503	-0.621883	1.13128	2.01459	0.956993
Pomc	1.25808	0.623637	0.972098	0.736537	0.707362	0.59309	1.67603	1.5967	0.927759	0.899117	1.81083		0.418713	-1.01537	-0.227715	-0.760173	-0.82612	-1.08442	1.36344	1.18412	-0.327938	-0.39268	1.66814
Oip5	0.71023	0.823556	0.371358	0.547111	0.56047	0.822377	0.604697	0.523494	0.447948	0.992271	1.58247		-0.046667	0.288725	-1.04957	-0.529423	-0.489887	0.285236	-0.358995	-0.599318	-0.822899	0.788043	2.53476
Grin2d	0.387279	0.479947	0.347338	0.295224	0.192801	0.266256	0.414591	0.360163	0.479712	0.444824	0.56358		0.0239876	0.886359	-0.347705	-0.832679	-1.78583	-1.10226	0.278154	-0.228355	0.884172	0.559503	1.66465
Cyb561	0.512444	0.319066	0.172156	0.304359	0.208788	0.303437	0.445227	0.312022	0.472374	0.4322	0.660247		0.951526	-0.402746	-1.43159	-0.505742	-1.17505	-0.512199	0.480789	-0.452077	0.670906	0.389558	1.98662
2810025M15Rik	0.919557	0.450209	0.845869	0.548325	0.43086	0.642235	0.826416	1.25202	0.988928	1.30394	0.865079		0.323797	-1.28101	0.0718413	-0.945528	-1.34717	-0.624428	0.00532715	1.46056	0.560992	1.63809	0.137525
Mob3b	0.590316	0.612031	0.536623	0.465883	0.488106	0.454729	1.00781	0.942202	0.632181	0.877451	1.02167		-0.462194	-0.364968	-0.702595	-1.01932	-0.919822	-1.06926	1.40707	1.11332	-0.27475	0.823406	1.46912
Rgmb	0.520544	0.733981	0.482661	0.38602	0.468291	0.392642	0.653845	0.56497	0.902099	0.977883	0.705175		-0.488813	0.591697	-0.680593	-1.16983	-0.75334	-1.13631	0.186014	-0.26391	1.44278	1.82643	0.445868
Bbs9	4.33401	4.13734	4.54901	3.23904	2.52026	2.97695	5.64969	6.39899	5.80841	6.79523	5.0943		-0.246844	-0.386306	-0.0943845	-1.0233	-1.533	-1.20916	0.686124	1.21746	0.798675	1.49844	0.292289
Cdca5	0.594312	0.327342	0.229608	0.144975	0.362005	0.560355	0.537256	0.494179	0.41088	0.273048	1.1825		0.46437	-0.495326	-0.846658	-1.15089	-0.370721	0.342303	0.259267	0.104415	-0.195026	-0.690501	2.57877
1700025G04Rik	5.75139	6.76152	5.74648	4.96599	5.26557	4.45518	8.42099	7.21736	7.67423	9.93263	10.4073		-0.609691	-0.101601	-0.612161	-1.00474	-0.854056	-1.26168	0.733103	0.127684	0.357487	1.49345	1.73221
Sipa1l2	1.11644	1.48305	0.924274	1.00926	0.692348	0.799806	1.4842	1.5592	1.55884	2.15397	1.35534		-0.396531	0.465102	-0.848174	-0.648434	-1.39326	-1.14071	0.467805	0.644076	0.64323	2.04195	0.164949
Thnsl1	0.775517	0.949925	0.78567	0.66779	0.756781	0.358491	1.17224	1.03033	1.12009	1.49529	1.00847		-0.481796	0.0995713	-0.447952	-0.840891	-0.54425	-1.8719	0.840631	0.367591	0.666795	1.91748	0.294724
Tnfsf4	0.251979	0.158615	0.15894	0.386366	0.303596	0.301692	0.513809	0.378089	0.199093	0.661533	0.731472		-0.595387	-1.07556	-1.07389	0.0957742	-0.329918	-0.33971	0.751222	0.053205	-0.867384	1.51098	1.87068
Itgb3bp	1.5568	1.91283	1.78455	1.12955	1.30925	1.21275	2.0322	2.27106	2.07901	2.62869	2.50103		-0.586583	0.111051	-0.140311	-1.42377	-1.07165	-1.26074	0.344954	0.812996	0.436678	1.51377	1.26362
Rnf32	0.331264	0.596082	0.365664	0.17407	0.241439	0.347042	0.525383	0.195664	0.821426	0.542129	0.529798		-0.473036	0.869923	-0.298585	-1.27021	-0.928561	-0.393021	0.51139	-1.1607	2.0127	0.596314	0.53378
Sdr42e1	1.40329	0.995267	1.31559	0.919092	1.18893	0.986795	2.06703	1.54796	1.8606	2.37477	1.98565		-0.222067	-1.04661	-0.399294	-1.20055	-0.655252	-1.06373	1.11924	0.0702854	0.702077	1.74112	0.954781
Kifap3	0.716713	0.893798	0.955336	0.672943	0.722323	0.566676	1.4541	1.11262	1.30175	1.44969	1.31671		-0.908936	-0.36894	-0.181288	-1.04241	-0.891829	-1.36645	1.33962	0.298328	0.875053	1.32618	0.920672
Krt10	1.04418	1.00279	0.738853	0.653117	0.827967	0.560982	1.37578	1.6873	1.1353	1.74946	1.15612		-0.102894	-0.207963	-0.877966	-1.09561	-0.65175	-1.32949	0.738871	1.52966	0.128414	1.68746	0.181265
Dscc1	1.09848	0.504194	0.707316	1.02718	0.600475	0.719246	1.00173	1.12172	1.13915	0.841132	2.51891		0.134763	-0.961308	-0.58668	0.00326064	-0.783732	-0.564677	-0.043678	0.177625	0.209772	-0.339877	2.75453
Sesn1	20.5865	21.9377	20.7598	14.352	15.017	13.8245	30.1426	27.4308	28.5962	33.1962	28.7481		-0.371799	-0.175419	-0.346612	-1.27791	-1.18126	-1.35457	1.01706	0.622936	0.792312	1.46087	0.814389
Sept10	0.347317	0.413085	0.242665	0.211261	0.385501	0.226823	0.53525	0.548241	0.439073	0.4642	0.718142		-0.418069	0.00727696	-1.09489	-1.29799	-0.171119	-1.19735	0.797363	0.88138	0.175351	0.337856	1.98019
Slc25a43	0.253827	0.214441	0.280185	0.14244	0.237595	0.305924	0.324194	0.62573	0.448662	0.453208	0.536554		-0.62889	-0.893248	-0.451975	-1.37652	-0.737839	-0.279216	-0.156588	1.86732	0.678839	0.709351	1.26877
Lypd6b	1.62835	2.59694	2.28033	1.80229	1.66258	1.2476	3.16837	3.10579	3.29328	3.74681	3.08662		-1.06126	0.103575	-0.277182	-0.852077	-1.02009	-1.51915	0.790781	0.715522	0.940998	1.48642	0.692468
Fgf13	32.9895	36.1478	31.4473	21.6859	26.1191	20.7897	43.8171	45.281	44.6584	52.189	47.7788		-0.334575	-0.0441244	-0.476402	-1.3741	-0.966406	-1.45652	0.661177	0.795803	0.738546	1.43109	1.02551
Cenpm	0.657823	0.334287	0.223422	0.345618	0.379536	0.583125	0.424017	0.354356	0.372967	0.206651	1.7132		0.35417	-0.413908	-0.677103	-0.387008	-0.306486	0.176836	-0.200888	-0.366264	-0.322081	-0.716917	2.85965
Ckap2l	0.448339	0.246942	0.171309	0.252385	0.371662	0.415497	0.344585	0.332049	0.254327	0.334502	1.1972		0.18448	-0.541524	-0.814169	-0.521903	-0.0919283	0.0660898	-0.189537	-0.234727	-0.514902	-0.225884	2.884
Gk5	0.198962	0.438346	0.395319	0.232964	0.205092	0.250125	0.586914	0.487611	0.458509	0.446893	0.572753		-1.31774	0.346558	0.0474161	-1.08134	-1.27512	-0.962033	1.37946	0.689069	0.486739	0.40598	1.28101
Wbscr27	4.32008	3.55848	4.53238	3.13301	3.06362	2.36485	7.81438	5.19499	4.00021	7.15242	5.58545		-0.170168	-0.615809	-0.0459434	-0.864768	-0.905371	-1.31425	1.87448	0.341775	-0.357336	1.48714	0.570248
Tmem220	0.363964	0.160261	0.843906	0.248529	0.409308	0.419454	0.900727	0.701012	0.36906	0.593089	1.01444		-0.650659	-1.37237	1.04975	-1.05964	-0.490008	-0.454062	1.25106	0.543481	-0.632604	0.161116	1.65394
Brca1	0.541552	0.760836	0.667094	0.566711	0.581038	0.583789	0.843942	0.741927	0.680076	0.873432	1.71447		-0.714997	-0.0511026	-0.334912	-0.638827	-0.595451	-0.587122	0.200505	-0.108351	-0.295608	0.289788	2.83608
2900041M22Rik	1.24221	1.07517	1.17531	0.562755	1.03936	1.06899	1.60422	1.66975	1.43135	2.21945	1.80301		-0.246574	-0.61574	-0.394426	-1.7482	-0.694882	-0.629398	0.553485	0.698309	0.171434	1.91317	0.99282
Tlr1	9.69784	13.1545	10.7689	8.80624	9.19067	6.97814	17.3229	12.7068	13.719	19.2176	18.5646		-0.732333	0.1001	-0.4744	-0.947048	-0.854469	-1.38729	1.10393	-0.00771478	0.236043	1.56022	1.40296
Cuedc1	1.40067	1.37922	1.16176	0.9386	1.2074	1.07397	2.29654	1.6467	1.94612	2.31616	2.5809		-0.407031	-0.444831	-0.828054	-1.22132	-0.747624	-0.982763	1.17173	0.0265397	0.554197	1.20631	1.67285
Shcbp1	0.209859	0.375663	0.23165	0.255962	0.270406	0.16489	0.374431	0.344409	0.169268	0.214259	0.843996		-0.545252	0.322249	-0.43124	-0.304037	-0.228465	-0.780534	0.315803	0.158725	-0.757628	-0.522231	2.77261
Cpeb3	0.227647	0.410922	0.430273	0.142162	0.271198	0.235822	0.544483	0.43197	0.506234	0.495439	0.519942		-1.11633	0.198262	0.337062	-1.72949	-0.803945	-1.05769	1.15626	0.349234	0.881912	0.804482	0.980236
Bzrap1	0.675532	0.902007	0.647761	0.432776	0.645832	0.600478	0.986957	0.883933	0.704479	0.710596	1.9412		-0.386648	0.179723	-0.456098	-0.993734	-0.460922	-0.574343	0.392167	0.134524	-0.314257	-0.298959	2.77855
Ncapg2	0.782351	0.55714	0.523387	0.462654	0.659088	0.728543	0.857264	0.80928	0.866866	0.742277	2.18124		-0.109831	-0.592057	-0.664329	-0.794372	-0.373764	-0.225045	0.0505744	-0.0521698	0.0711344	-0.195638	2.8855
C1qtnf9	0.208376	0.688632	0.558605	0.377601	0.167374	0.218301	0.453225	0.625328	0.411605	0.455883	0.756121		-1.20737	1.21885	0.56196	-0.352459	-1.41451	-1.15723	0.0295878	0.89904	-0.180674	0.0430158	1.5598
Socs2	2.957	3.12127	3.27549	2.62103	3.20758	3.3875	4.17841	4.82789	4.73876	6.70775	7.94308		-0.775721	-0.678642	-0.587502	-0.974271	-0.627635	-0.521307	-0.0538995	0.329926	0.277253	1.44087	2.17092
Rad51	0.915284	0.893032	0.865993	0.842055	1.32333	1.34243	1.04515	1.14447	1.03656	1.25487	4.4283		-0.443473	-0.465082	-0.49134	-0.514586	-0.0472173	-0.0286692	-0.317359	-0.220909	-0.325701	-0.113699	2.96804
Tspan32	6.00418	6.4493	7.86986	5.0647	5.01394	4.08964	10.4361	7.85237	8.39096	11.7698	11.6597		-0.629098	-0.463087	0.0667226	-0.979485	-0.998416	-1.34314	1.02382	0.0601995	0.261071	1.52124	1.48017
Csrp2	0.590661	0.325331	0.162999	0.288169	0.207566	0.232047	0.491802	0.516993	0.612533	0.527665	0.687639		0.918365	-0.527461	-1.41203	-0.729963	-1.16918	-1.03578	0.379666	0.516936	1.03755	0.57509	1.44681
Exo1	0.152625	0.189146	0.126355	0.186155	0.205599	0.239841	0.226929	0.175336	0.246209	0.243477	0.823808		-0.537427	-0.347474	-0.674062	-0.363031	-0.261899	-0.0838001	-0.150958	-0.419303	-0.0506789	-0.0648886	2.95352
Cep55	0.417366	0.536445	0.204738	0.331184	0.333238	0.753106	0.483074	0.588699	0.470206	0.686547	1.80839		-0.426347	-0.150151	-0.919523	-0.62624	-0.621476	0.352379	-0.273941	-0.0289516	-0.303788	0.198	2.80004
Slc22a17	0.387185	0.453174	0.534237	0.283347	0.340155	0.304219	0.621735	0.677789	0.736124	0.889432	0.778576		-0.761376	-0.445013	-0.0563822	-1.25919	-0.986846	-1.15913	0.363099	0.631832	0.9115	1.64649	1.11502
Sec14l2	0.304675	0.287679	0.264245	0.169878	0.244724	0.159593	0.455591	0.457158	0.341033	0.466595	0.571202		-0.253596	-0.381406	-0.557632	-1.26728	-0.704431	-1.34462	0.881302	0.893086	0.0198188	0.964052	1.7507
E2f1	1.05942	1.08448	1.28217	1.02165	1.87226	1.32005	1.52606	1.24466	1.4054	1.45446	6.29801		-0.47388	-0.457376	-0.327181	-0.498755	0.0614422	-0.302234	-0.166559	-0.351884	-0.246024	-0.213714	2.97616
B9d1	0.783437	0.479456	0.480437	0.339751	0.407867	0.182389	0.497	0.380959	0.320967	0.977611	0.737023		1.17916	-0.121725	-0.117527	-0.719594	-0.428091	-1.39303	-0.0466455	-0.543244	-0.79998	2.01013	0.980535
Fam64a	0.0801518	0.220735	0.0884747	0.0391041	0.112666	0.377861	0.114406	0.315698	0.221653	0.204581	0.780424		-0.726386	-0.0553959	-0.686662	-0.922303	-0.571199	0.694552	-0.562894	0.397854	-0.0510144	-0.132497	2.61595
Kifc3	0.724286	0.83127	0.779009	0.454083	0.503492	0.330789	0.908389	0.938401	1.12335	1.3118	1.11733		-0.314769	0.0363297	-0.13518	-1.20152	-1.03937	-1.60614	0.289418	0.387911	0.994875	1.61333	0.975118
Spag5	0.489266	0.261784	0.401195	0.231881	0.301295	0.292896	0.372459	0.342595	0.270605	0.299715	1.27826		0.257867	-0.510323	-0.0395426	-0.611303	-0.376897	-0.40526	-0.136582	-0.23743	-0.480535	-0.382233	2.92224
A630023P12Rik	0.573411	0.63166	0.379772	0.447605	0.644813	0.120144	0.763902	0.702652	1.48	1.7563	0.582595		-0.339875	-0.21721	-0.747654	-0.604807	-0.189512	-1.2944	0.0612748	-0.06771	1.56929	2.15114	-0.320535
Aurkb	0.548171	0.603856	0.286622	0.309666	0.405546	0.664953	0.329448	0.631318	0.558496	0.29456	2.36948		-0.149126	-0.0551724	-0.590419	-0.551538	-0.389767	0.0479122	-0.518162	-0.00883771	-0.131705	-0.577026	2.92384
Csf2	0.183024	0.134411	0.134686	0.357171	0	0.19174	0.464429	0.427191	0.393661	0.498296	0.61985		-0.661044	-0.915134	-0.913697	0.249186	-1.61767	-0.615488	0.809801	0.615166	0.439912	0.986817	1.62215
Rad51ap1	0.279082	0.273273	0.37652	0.272315	0.377764	0.584748	0.236061	0.48855	0.314428	0.506549	2.07413		-0.46919	-0.480239	-0.283864	-0.482061	-0.281498	0.112184	-0.551016	-0.0707836	-0.401962	-0.0365496	2.94498
Nusap1	0.647752	0.3984	0.222827	0.268594	0.321075	0.288385	0.380374	0.417625	0.372223	0.299785	1.55377		0.47194	-0.190376	-0.656723	-0.53516	-0.395762	-0.482592	-0.238255	-0.139311	-0.259906	-0.452312	2.87846
Synj2bp-cox16	0.123532	0.282703	2.4759	2.12814	2.32414	1.54635	5.20267	5.39313	1.25881	4.58319	8.14959		-1.17347	-1.10948	-0.2278	-0.367602	-0.288809	-0.601485	0.868377	0.944943	-0.717078	0.619342	2.05306
2210408F21Rik	0.128674	0	0.302394	0.110641	0.106258	0.247557	0.112416	0.413666	0.326771	0.602434	0.455442		-0.687954	-1.38806	0.257249	-0.786071	-0.809919	-0.0411168	-0.776413	0.862675	0.389883	1.88975	1.08998
Mki67	1.45001	1.44492	1.09156	0.809915	0.998702	1.58885	1.36517	1.70866	1.42637	1.26594	6.48988		-0.212016	-0.215233	-0.438573	-0.616586	-0.497264	-0.124262	-0.265639	-0.0485365	-0.226957	-0.328357	2.97342
Clspn	0.254045	0.303173	0.338847	0.134271	0.466213	0.454664	0.49356	0.426191	0.31224	0.291793	2.14199		-0.465288	-0.376202	-0.311512	-0.68248	-0.080553	-0.101495	-0.0309633	-0.153127	-0.35976	-0.396838	2.95822
Art4	0.1392	0.178897	0.384136	0.181099	0.152185	0.170135	0.463608	0.426436	0.449103	0.544788	0.628576		-1.11591	-0.893096	0.258869	-0.880736	-1.04302	-0.942275	0.704929	0.49629	0.623515	1.16058	1.63086
Gm15972	0.712236	0.261529	1.04826	0.46331	0.222479	0	1.35549	1.45461	0.218847	1.21195	0.402024		0.0853176	-0.788871	0.737068	-0.397498	-0.864612	-1.29613	1.33297	1.52522	-0.871656	1.05456	-0.516368
Ccdc136	0.168305	0.185402	0.167203	0.197068	0.173491	0.177588	0.432421	0.338823	0.449922	0.652745	0.641067		-0.824889	-0.735355	-0.83066	-0.674262	-0.797731	-0.776276	0.558246	0.0680876	0.649896	1.71205	1.65089
Ppp2r2c	0.145372	0.0873486	0.189643	0.154742	0.185766	0.124605	0.440148	0.300751	0.353284	0.49923	0.660174		-0.76494	-1.08157	-0.523359	-0.713809	-0.544515	-0.878263	0.843615	0.0829432	0.369609	1.16602	2.04427
Ttc28	0.168845	0.212568	0.133127	0.108265	0.122059	0.146563	0.555455	0.401134	0.426904	0.531931	0.445211		-0.719092	-0.47113	-0.921656	-1.06265	-0.984425	-0.845458	1.47345	0.598267	0.744414	1.34004	0.848237
Ccnb2	0.643073	0.916752	0.334047	0.184553	0.567177	1.18888	0.755918	0.761528	0.836877	0.695178	4.61204		-0.331285	-0.10576	-0.585938	-0.709129	-0.393827	0.118488	-0.238295	-0.233672	-0.171581	-0.288348	2.93935
Kntc1	0.142215	0.164907	0.156983	0.102249	0.231469	0.141147	0.199432	0.248956	0.220791	0.152839	1.34353		-0.394638	-0.330679	-0.353013	-0.507284	-0.14307	-0.397648	-0.233368	-0.0937817	-0.173166	-0.364693	2.99134
Mcm10	0.0922347	0.152407	0.169688	0.089998	0.201679	0.193256	0.190166	0.234415	0.141705	0.251119	1.57575		-0.485602	-0.344495	-0.303971	-0.490847	-0.228951	-0.248703	-0.255949	-0.152183	-0.369592	-0.113012	2.9933
Cdc6	0.116845	0.0901035	0.102006	0.0798102	0.197107	0.183635	0.311358	0.296621	0.236984	0.178951	2.06787		-0.407355	-0.453871	-0.433167	-0.471776	-0.26774	-0.291175	-0.0690026	-0.0946374	-0.198375	-0.299323	2.98642
Pard3	0.0842787	0.0917605	0.0421473	0.0496736	0.0837451	0.070631	0.501475	0.466116	0.292211	0.610949	0.621263		-0.754659	-0.723405	-0.930658	-0.899218	-0.756888	-0.811671	0.988134	0.840425	0.113956	1.44545	1.48853
2210408I21Rik	0.278238	0.326627	0.406763	0.341875	0.502079	0.455187	0.367891	0.56905	0.604082	0.378336	0.66974		-1.32655	-0.942649	-0.306873	-0.821676	0.449338	0.0773098	-0.615272	0.980667	1.2586	-0.532404	1.77951
Dgcr6	1.36216	1.21011	1.26109	1.58638	1.48237	0.874577	1.75614	2.03356	2.05311	1.70476	2.08335		-0.564702	-0.954368	-0.823719	0.00991855	-0.256633	-1.81426	0.444971	1.15593	1.20603	0.313297	1.28353
Dcxr	4.8167	2.80906	3.20576	2.83377	3.7172	4.08141	6.20115	5.14595	5.15831	4.26683	4.49802		0.534404	-1.35402	-0.980879	-1.33078	-0.499808	-0.157225	1.83665	0.844103	0.855729	0.0171851	0.234647
Efcab2	0.758424	1.0503	1.05245	1.0149	1.03562	0.88535	1.38154	1.57423	1.41821	1.15043	0.862305		-1.37741	-0.226081	-0.2176	-0.365719	-0.283987	-0.876739	1.08052	1.8406	1.22517	0.168889	-0.967641
Arrb1	4.0555	4.56459	4.54527	3.25462	2.93293	3.04025	7.57342	6.14537	6.40884	7.04103	6.01522		-0.600822	-0.294016	-0.305659	-1.08348	-1.27734	-1.21267	1.51927	0.658649	0.81743	1.19842	0.580213
Gm12504	0.623779	0.32983	0.440673	0.706037	0.561163	0.758045	0.617316	0.895408	0.621002	0.458538	0.718272		0.0745533	-1.75855	-1.06732	0.587523	-0.315927	0.911851	0.0342493	1.76846	0.0572356	-0.955908	0.663822
Car9	0.518728	0.571422	0.254485	0.393671	0.405084	0.362289	0.822681	0.681047	0.55786	0.353069	0.365997		0.227738	0.542279	-1.34958	-0.518751	-0.450624	-0.706076	2.04209	1.19665	0.461324	-0.761112	-0.683942
Cxxc5	0.293478	0.404113	0.323952	0.453405	0.435446	0.486804	0.511988	0.51375	0.541058	0.399508	0.331309		-1.58241	-0.269284	-1.22072	0.315763	0.102608	0.712176	1.01108	1.032	1.35612	-0.323941	-1.13339
Acvr2a	0.590994	0.579824	0.540238	0.441508	0.553822	0.493378	0.966584	0.81634	0.842709	1.1229	0.891308		-0.543505	-0.593391	-0.770183	-1.21111	-0.709516	-0.979462	1.13389	0.462899	0.580664	1.83201	0.797709
Vwa5a	1.04407	0.992101	1.09488	1.33653	1.40684	1.03914	1.71316	1.2991	1.8034	1.94637	2.19907		-0.965646	-1.09139	-0.842702	-0.257988	-0.0878608	-0.977575	0.653334	-0.348556	0.871685	1.21763	1.82908
Zfp28	1.33433	1.55467	1.4304	1.46472	1.39468	1.81455	2.39292	2.11122	2.15248	2.08275	1.92275		-1.22876	-0.63047	-0.967901	-0.874712	-1.06489	0.0751844	1.64564	0.880735	0.992769	0.80343	0.368981
2610306M01Rik	2.68111	2.7521	1.7488	2.73501	2.62668	2.23428	4.11684	4.26676	2.69614	3.04839	3.14711		-0.316493	-0.219989	-1.58387	-0.243222	-0.390485	-0.923911	1.63523	1.83903	-0.296061	0.182785	0.316985
Blvrb	4.20854	2.27573	3.37853	3.13563	2.00762	1.84362	6.69836	5.55857	2.96229	1.95302	4.0813		0.474822	-0.757687	-0.0544564	-0.209348	-0.928654	-1.03323	2.06252	1.3357	-0.319883	-0.963471	0.393684
Synj2	1.3484	0.914705	0.835404	1.02599	1.03664	1.10004	1.46686	1.79808	1.52871	1.38799	1.34203		0.323857	-1.15102	-1.4207	-0.772569	-0.736351	-0.520746	0.726706	1.85309	0.937041	0.458492	0.302194
Wdr19	0.999719	0.875713	1.23648	0.658153	0.665946	0.769726	1.68485	1.61301	1.52111	1.8569	1.65209		-0.509958	-0.784169	0.0135859	-1.26525	-1.24802	-1.01854	1.00505	0.846197	0.642981	1.3855	0.932614
Fbxo10	0.662171	0.57853	0.856965	0.779793	0.502837	0.586064	1.01035	1.21913	1.02084	1.25886	0.995632		-0.761229	-1.08143	-0.0155069	-0.310942	-1.3712	-1.05259	0.571691	1.37096	0.61185	1.52305	0.515347
Chic1	1.08222	1.02959	0.954126	1.07655	1.32366	1.13376	1.40429	1.6546	1.69721	1.31298	1.58864		-0.810882	-1.01037	-1.29642	-0.832374	0.104283	-0.615523	0.409907	1.35869	1.52021	0.0638015	1.10868
Gm4532	3.17957	3.50256	4.38716	3.39332	4.46937	4.47603	6.24031	6.00087	4.94596	4.36213	3.11272		-1.12409	-0.819097	0.0162037	-0.922249	0.093832	0.100121	1.76608	1.53998	0.543861	-0.0074314	-1.18721
Cxx1b	0.78717	1.13811	1.19475	1.10412	0.922074	1.39161	1.40447	1.76555	1.67799	2.76263	1.95779		-1.20904	-0.582335	-0.481189	-0.643034	-0.968128	-0.12964	-0.106675	0.538134	0.381771	2.3187	0.881432
Tspan6	0.551501	0.536051	0.393909	0.6964	0.547214	0.475808	1.01872	0.624693	0.657899	0.629308	0.576814		-0.364636	-0.461192	-1.34952	0.540918	-0.391428	-0.837684	2.55527	0.0927809	0.300304	0.121623	-0.206442
Dkkl1	16.7861	14.8249	14.2962	14.7553	14.6455	18.0404	22.9271	27.2318	21.2761	24.4513	20.461		-0.505994	-0.941782	-1.05926	-0.957248	-0.981646	-0.227282	0.858569	1.8151	0.491708	1.19725	0.310588
Lrrc75b	6.68291	6.90563	8.08787	6.43107	5.89609	7.03734	11.5255	11.3766	10.8681	9.51232	9.32984		-0.873288	-0.767064	-0.203207	-0.993401	-1.24855	-0.704246	1.43634	1.36532	1.1228	0.47617	0.389138
Gm15706	2.66967	2.69579	2.04645	1.51954	2.15429	3.18526	5.15135	2.98579	3.41793	3.17992	2.82544		-0.238968	-0.211114	-0.903545	-1.46542	-0.788549	0.310837	2.4074	0.0981304	0.558948	0.305143	-0.0728606
Ndrg2	1.74672	1.48686	1.75389	0.903826	1.41471	1.67824	2.61915	2.74458	2.41356	2.6838	1.86949		-0.31892	-0.752838	-0.306948	-1.7264	-0.873315	-0.433269	1.13788	1.34732	0.794579	1.24583	-0.113917
Apol7b	0.425008	0.275401	0.303562	0.268337	0.257708	0.104765	0.689906	0.372001	0.507003	0.663642	0.910199		-0.0392386	-0.669573	-0.550923	-0.699336	-0.744118	-1.38851	1.07685	-0.262571	0.306228	0.966191	2.005
2010107G23Rik	0.596179	0.437828	0.219362	0.387815	0.248303	0.138794	0.945517	0.463843	0.549561	0.676311	0.841289		0.376086	-0.245932	-1.10409	-0.442388	-0.990405	-1.42057	1.74832	-0.143743	0.192966	0.690852	1.3389
BC026585	0.745817	0.924278	0.617446	0.727731	0.480498	0.586003	0.887127	1.1016	1.58984	0.951818	0.789336		-0.359408	0.229769	-0.783215	-0.419117	-1.23534	-0.887022	0.107117	0.815185	2.42707	0.32069	-0.215733
Nsg2	26.8283	30.4199	22.0506	18.115	21.4536	15.1457	44.2904	37.7605	42.0061	56.6645	44.9317		-0.441001	-0.171109	-0.800023	-1.09577	-0.844885	-1.3189	0.871196	0.380504	0.699541	1.80105	0.919386
Abcg2	1.28265	1.36422	1.02526	0.971024	0.891116	1.08889	1.72558	2.18728	1.83468	1.33212	1.34813		-0.21363	-0.0101008	-0.855854	-0.991181	-1.19056	-0.697089	0.891544	2.04355	1.16376	-0.0901949	-0.0502476
Cdkn2c	3.14359	3.03709	2.99095	2.39684	2.67225	2.5012	5.1874	4.75786	4.4251	5.47944	4.82953		-0.531478	-0.622482	-0.661908	-1.16957	-0.934236	-1.0804	1.21495	0.847909	0.563567	1.4645	0.909151
Nmnat3	2.61154	2.4211	2.54022	2.57344	2.93189	2.92554	4.05978	4.00585	3.81359	3.77506	4.072		-0.922892	-1.19896	-1.02628	-0.978122	-0.458505	-0.46771	1.17651	1.09833	0.819627	0.763773	1.19422
Mapk11	5.89828	6.7215	5.48798	7.40905	8.68271	5.80039	10.5157	8.74285	9.18675	11.3056	10.8681		-1.10503	-0.716246	-1.29881	-0.391532	0.209987	-1.15126	1.07566	0.23839	0.448033	1.44872	1.24209
Fmo5	1.45489	1.74215	1.82074	1.15895	1.37503	1.20854	2.63315	2.41966	2.83077	2.87216	2.49898		-0.824131	-0.390919	-0.272398	-1.27043	-0.944567	-1.19565	0.952784	0.630823	1.25081	1.31323	0.750445
Oplah	3.34399	3.44698	3.2465	3.47256	3.88876	2.85866	6.38968	4.71364	4.75374	4.9909	5.46928		-0.80507	-0.711915	-0.893249	-0.688778	-0.312326	-1.24405	1.94975	0.433777	0.470048	0.684559	1.11725
Gm527	2.08891	1.32757	2.21714	1.01913	1.46814	1.30462	3.32568	3.02386	2.55508	3.2811	2.58494		-0.133371	-1.05028	0.0210617	-1.42175	-0.880989	-1.07792	1.35612	0.992627	0.428056	1.30243	0.464018
Sh3bp5	18.0326	22.7864	17.6661	13.9849	18.4232	18.5412	31.9644	30.338	30.3069	39.4385	40.4627		-0.818503	-0.306446	-0.857981	-1.2545	-0.77643	-0.763719	0.682167	0.506978	0.503628	1.48724	1.59756
Ufsp1	1.14944	0.492414	1.05733	1.18388	0.83778	1.73938	1.03302	2.12395	1.11843	1.10835	1.45982		-0.13731	-1.64102	-0.348119	-0.0584887	-0.850596	1.21286	-0.403757	2.09302	-0.208282	-0.231352	0.573046
Lrig1	1.0196	0.854077	0.867549	0.901602	0.955465	0.767736	1.42501	1.33865	1.58603	1.35543	1.58266		-0.421815	-0.955826	-0.912363	-0.802501	-0.628728	-1.23438	0.886122	0.607507	1.40561	0.661643	1.39473
Ccbl2	0.366143	0.430267	0.673775	0.333419	0.480428	0.383593	0.557577	0.876246	0.900457	0.722924	0.558133		-1.02872	-0.706993	0.514757	-1.19291	-0.455321	-0.941171	-0.068242	1.53061	1.65209	0.761352	-0.0654524
Fgfrl1	0.372801	0.409321	0.358959	0.422672	0.523801	0.237698	0.647899	0.569155	0.594358	0.379062	0.458587		-0.656248	-0.354442	-0.770641	-0.244108	0.591635	-1.77276	1.6172	0.966446	1.17473	-0.604507	0.0526981
Pcbp3	0.718482	0.282667	0.538167	0.325492	0.264507	0.403232	0.756943	0.696251	0.99345	0.733546	0.89076		0.468454	-1.25931	-0.246394	-1.08953	-1.3313	-0.781335	0.620931	0.380321	1.55855	0.528175	1.15144
H2-DMb1	0.608782	0.206346	0.568613	0.502632	0.0438839	0.147179	0.935796	0.573842	0.69068	0.0956225	0.79299		0.462098	-0.874699	0.328666	0.109493	-1.41436	-1.07124	1.54836	0.346036	0.734144	-1.2425	1.07399
Lamb3	0.862382	0.862295	0.834769	0.983874	0.920035	1.37604	1.22463	1.39353	1.45537	0.961739	0.864956		-0.83918	-0.839537	-0.952295	-0.341496	-0.603008	1.26499	0.644745	1.33663	1.58996	-0.432171	-0.828636
Idi1	3.05773	4.12152	3.39621	3.03918	3.86207	3.74057	4.6627	5.63534	6.56514	5.77833	7.76677		-1.05495	-0.368771	-0.836617	-1.06691	-0.536124	-0.614495	-0.0196945	0.607686	1.20743	0.699919	1.98252
Amd2	20.95	10.3069	14.0319	15.4607	17.3922	21.0275	22.7161	25.8343	23.8269	19.5637	21.1966		0.358865	-1.95681	-1.14634	-0.835473	-0.415225	0.375727	0.743126	1.42157	0.984809	0.0572402	0.412519
Elovl6	1.68147	1.87168	1.96297	1.44313	1.88095	1.63244	3.43466	2.82022	2.57249	2.61554	2.82498		-0.895981	-0.595763	-0.451675	-1.27217	-0.581132	-0.973368	1.87117	0.901367	0.510361	0.578309	0.908879
Zeb2	9.88506	10.2873	12.8299	8.91215	9.7373	11.4699	17.0198	18.8878	16.9086	9.91662	16.5893		-0.833239	-0.723865	-0.0325017	-1.09779	-0.873417	-0.402302	1.10678	1.61471	1.07655	-0.824658	0.989725
Col20a1	0.812264	1.03459	0.784533	0.643961	0.832535	0.704693	1.6304	1.24418	1.36881	1.68451	1.37546		-0.768977	-0.177785	-0.842717	-1.21651	-0.715074	-1.05502	1.40654	0.379539	0.710945	1.55043	0.728629
2810454H06Rik	0.521005	0.637701	0.127801	0.489542	0.506318	0.646896	0.697759	0.84449	0.533627	0.689538	0.375773		-0.162536	0.452207	-2.2339	-0.328281	-0.239906	0.500646	0.768587	1.54155	-0.096045	0.72528	-0.927605
Gm4890	0.684583	0.62729	0.512169	0.829967	0.835993	0.67372	1.02682	0.944195	0.97526	0.995454	0.895785		-0.784115	-1.12009	-1.79519	0.0684522	0.10379	-0.847818	1.22285	0.738313	0.920486	1.03891	0.454425
Rab3d	4.1698	4.24356	4.0846	3.34118	3.73933	3.70301	5.78103	7.63787	6.78383	6.1603	5.96209		-0.609332	-0.558567	-0.66797	-1.17962	-0.9056	-0.930597	0.499584	1.77754	1.18975	0.760614	0.624197
Spin2c	1.28505	1.61781	1.5198	1.92561	1.54828	1.92321	2.00892	1.80767	3.34215	2.99883	3.88579		-1.04363	-0.650928	-0.766595	-0.287678	-0.732984	-0.290511	-0.18936	-0.426865	1.38405	0.978881	2.02563
9030617O03Rik	2.89245	2.59691	2.6945	2.96914	3.22756	3.71332	4.26381	4.4634	4.56195	5.42824	4.95459		-0.916503	-1.21598	-1.11709	-0.83879	-0.576926	-0.0846913	0.473136	0.675387	0.77525	1.65309	1.17312
Ncf2	0.570883	0.326084	0.490127	0.804613	0.475534	0.332263	0.865159	0.666243	0.721148	0.366982	0.286433		0.166981	-1.03449	-0.22937	1.31413	-0.300993	-1.00417	1.61129	0.635009	0.904483	-0.833767	-1.2291
AA414768	1.03568	0.874684	0.457291	0.640027	0.71173	0.83184	1.21549	1.38998	1.24111	0.845919	1.69533		0.113621	-0.330177	-1.48075	-0.977028	-0.779373	-0.44828	0.609281	1.09028	0.679905	-0.40947	1.932
Capg	11.4462	9.19841	9.46541	8.03834	11.749	15.1583	13.7826	17.7575	17.3832	15.0424	14.8714		-0.492376	-1.16931	-1.0889	-1.51867	-0.401186	0.62554	0.211242	1.4083	1.29558	0.590636	0.539139
Hdac11	2.4515	2.06798	1.97469	1.87485	1.61432	1.78158	3.08937	3.6729	3.82742	3.26956	2.35613		-0.116734	-0.6025	-0.720661	-0.847118	-1.17711	-0.965254	0.691191	1.43029	1.626	0.919419	-0.23753
Sarm1	0.560841	0.69102	0.519613	0.601576	0.509202	0.651662	0.854856	1.03353	1.00178	0.896171	0.734341		-0.909747	-0.218769	-1.12858	-0.693529	-1.18384	-0.427677	0.650857	1.59924	1.43072	0.870154	0.0111751
Tmem159	2.47222	2.6772	2.12764	2.41227	1.49213	2.50217	3.70819	4.54782	3.6308	4.14972	3.58324		-0.586723	-0.370168	-0.950761	-0.650058	-1.62216	-0.555082	0.719042	1.60609	0.637282	1.18551	0.587036
Lima1	0.33605	0.213568	0.399483	0.378348	0.266464	0.203107	0.418171	0.746662	0.393174	0.237527	0.284527		-0.107903	-0.913186	0.30915	0.170193	-0.565411	-0.981964	0.432018	2.59175	0.26767	-0.755663	-0.446652
Prdx4	7.41249	6.2867	7.82014	6.27264	6.08566	7.0783	9.80006	13.1482	12.3959	8.77342	11.83		-0.535933	-0.967846	-0.379537	-0.97324	-1.04498	-0.664146	0.380066	1.66459	1.37597	-0.0138077	1.15886
I730030J21Rik	5.72168	5.72738	5.01491	5.0195	4.51298	3.00977	9.20876	9.19371	8.65256	8.68185	8.00158		-0.407616	-0.40501	-0.730779	-0.728681	-0.960281	-1.64761	1.18681	1.17993	0.932497	0.94589	0.634843
Klre1	14.2667	13.2014	19.6851	12.3198	14.7063	21.0741	19.6171	34.7148	23.2117	11.3613	17.0318		-0.602705	-0.76229	0.208989	-0.894357	-0.536851	0.417066	0.198802	2.46049	0.737285	-1.03794	-0.188484
Arl6	0.469744	0.646829	0.475312	0.496549	0.513565	0.451107	0.893995	0.788051	0.938194	0.559526	1.12688		-0.859359	-0.0958819	-0.835354	-0.743793	-0.670431	-0.93971	0.96974	0.512977	1.1603	-0.472277	1.97379
Elovl7	1.89431	2.32097	1.8243	1.5466	1.67554	1.41752	3.42123	3.17229	3.35873	4.00621	3.48598		-0.703734	-0.250442	-0.778114	-1.07315	-0.93616	-1.21029	0.918496	0.654017	0.852094	1.53999	0.987287
Prrg4	2.46946	2.15095	2.89493	2.036	2.17062	1.74477	4.64511	3.95431	3.79393	4.74931	4.39239		-0.622814	-0.901223	-0.25091	-1.0017	-0.88403	-1.25627	1.27892	0.675094	0.534905	1.37	1.05802
Zc3h6	3.12344	3.26338	3.51887	3.52947	3.92277	4.03684	6.91469	5.28927	4.13577	5.82994	4.98013		-1.07554	-0.958834	-0.745771	-0.736931	-0.408942	-0.313814	2.08614	0.730638	-0.231313	1.18153	0.472834
1700056E22Rik	1.39199	1.31433	1.53653	1.68162	1.24232	2.22214	2.90146	2.20468	1.89416	2.09792	2.18877		-0.96929	-1.12366	-0.681985	-0.393587	-1.26679	0.680816	2.03111	0.64611	0.0288834	0.433901	0.614486
1700029J07Rik	0.977219	1.09846	0.814522	1.22596	0.878376	0.835723	1.67002	1.6234	1.48909	1.64927	0.911819		-0.63259	-0.284612	-1.09955	0.0813293	-0.916282	-1.0387	1.35584	1.22203	0.836547	1.29628	-0.820297
Nicn1	1.41155	0.93883	1.29353	0.831588	1.07319	1.14396	2.2809	1.95815	1.79218	1.8762	1.53337		-0.118709	-1.13665	-0.372849	-1.36758	-0.847322	-0.694928	1.75332	1.05832	0.700927	0.881853	0.143614
Tspan17	0.673347	0.329666	0.578096	0.511015	0.420663	0.509467	0.533951	0.851307	1.24139	0.534695	0.665128		0.205592	-1.18708	-0.180386	-0.452212	-0.818338	-0.458485	-0.359271	0.926723	2.50742	-0.356256	0.172286
Hpgds	1.02983	0.79231	0.757844	1.22816	1.02633	0.685002	1.5866	1.55955	1.14519	1.0848	1.34251		-0.273031	-1.05694	-1.17069	0.381535	-0.284582	-1.4111	1.56453	1.47525	0.107702	-0.0916085	0.758934
Gm14327	0.281915	0.683217	0.435664	0.550158	0.63404	0.531615	0.858444	0.641561	0.831586	0.633218	0.716076		-2.02048	0.392402	-1.09604	-0.407632	0.096719	-0.519124	1.44598	0.14194	1.28449	0.0917766	0.58997
B3galt5	0.773138	0.887163	0.829713	1.05824	0.915699	0.686216	1.48162	1.30643	1.35608	1.64448	1.16373		-1.04142	-0.678378	-0.861293	-0.133686	-0.587522	-1.31817	1.21431	0.656526	0.814606	1.73284	0.202184
Paqr8	0.587816	0.845752	0.62237	0.444803	0.607052	0.502703	1.17578	1.19701	1.06159	1.32276	1.27978		-0.85815	-0.0928282	-0.755625	-1.28248	-0.801075	-1.11069	0.886398	0.94939	0.547585	1.3225	1.19498
Tiam1	0.342617	0.419355	0.380553	0.346663	0.376403	0.345654	0.607468	0.646697	0.654576	0.488239	0.749386		-0.961635	-0.450733	-0.709067	-0.934698	-0.736696	-0.941415	0.801675	1.06285	1.11531	0.00787914	1.74653
B130034C11Rik	0.967756	1.06606	1.11469	0.944289	1.10404	0.925686	1.76171	2.02557	1.47387	1.50355	1.03313		-0.80324	-0.538028	-0.40683	-0.866551	-0.435562	-0.916739	1.33875	2.05061	0.562193	0.642266	-0.626869
Cxx1c	4.53015	4.24552	3.13468	2.57301	3.16807	3.25838	7.07741	5.32632	7.54158	6.00578	6.98421		-0.203145	-0.361621	-0.98011	-1.29283	-0.961519	-0.911237	1.21511	0.240143	1.47355	0.61845	1.16322
Pou2af1	1.24192	1.39166	1.20543	1.48341	1.36446	0.740262	2.22093	2.21153	2.03302	2.44847	2.21179		-0.799462	-0.53027	-0.865061	-0.365328	-0.579168	-1.70131	0.960537	0.943638	0.622725	1.36959	0.944105
Cul9	2.37655	2.3992	2.26527	2.17036	2.22707	2.03895	3.9875	3.96908	3.92987	3.96061	3.88984		-0.719352	-0.69401	-0.843859	-0.95005	-0.8866	-1.09708	1.08308	1.06247	1.0186	1.05299	0.973811
5730409E04Rik	0.573308	0.652119	0.71725	0.783215	0.931309	0.659563	1.14577	1.0539	1.09035	1.32451	1.11656		-1.36663	-1.04997	-0.788279	-0.523238	0.0717909	-1.02006	0.933476	0.564351	0.710804	1.65164	0.816113
1700123M08Rik	0.352034	0.646325	0.323824	0.915993	0.329892	0.491734	0.669974	0.975738	0.594929	0.539123	0.546444		-1.05076	0.302466	-1.18047	1.54247	-1.15257	-0.408381	0.41121	1.81719	0.0661349	-0.190475	-0.156811
Sord	1.35362	1.11156	1.35834	1.44086	1.3146	1.59857	1.85013	2.26187	2.3821	1.58302	2.72975		-0.71915	-1.1868	-0.710031	-0.550605	-0.794536	-0.245914	0.240093	1.03556	1.26784	-0.275956	1.93949
Slc14a1	8.73146	8.85638	7.51107	7.66757	8.95137	7.94937	16.7842	14.2476	11.6115	16.3342	13.7882		-0.673277	-0.638215	-1.01581	-0.971881	-0.611554	-0.892787	1.5869	0.874948	0.135069	1.4606	0.746007
Asap2	1.9702	1.74214	1.75935	2.4022	2.56045	2.36549	3.02715	2.87316	3.41942	3.0285	3.33806		-1.03376	-1.41435	-1.38563	-0.312819	-0.0487255	-0.374082	0.730121	0.473137	1.38476	0.732374	1.24898
Dmrta1	7.11125	7.79044	7.89296	8.07402	7.99921	7.14865	13.7079	11.9795	13.1465	15.6952	12.3075		-1.00514	-0.788284	-0.755551	-0.697742	-0.721628	-0.993195	1.10105	0.549203	0.921804	1.73555	0.653927
Eef2k	1.44033	2.05811	1.38094	1.23676	1.40373	1.04333	2.84299	2.85276	2.64782	2.90745	2.94074		-0.806626	-0.0135093	-0.882871	-1.06797	-0.853613	-1.3163	0.994133	1.00668	0.74357	1.07689	1.11963
Clec1b	0.680639	0.230699	0.232548	0.255431	0.147189	0.27425	0.736234	0.736812	0.48262	0.0719134	0.322829		1.25357	-0.617538	-0.609849	-0.514689	-0.96482	-0.436428	1.48476	1.48717	0.430093	-1.27786	-0.234409
Sbsn	1.9522	1.25789	1.15985	2.29333	1.77052	2.40308	2.63955	2.9147	1.93234	3.92741	2.54226		-0.385996	-1.27424	-1.39966	0.0504167	-0.618423	0.190822	0.493342	0.845346	-0.411404	2.14092	0.368877
Cd79a	0.135109	0.198445	0.845117	0.439442	0.211018	0.424631	1.1571	0.709547	0.166059	0.183922	0.419444		-0.934726	-0.743396	1.21013	-0.0153714	-0.705414	-0.0601137	2.15259	0.800585	-0.84123	-0.787268	-0.075783
Kdm4d	0.884772	0.974651	0.658668	0.682623	1.07979	0.754462	2.17335	0.954521	1.2139	1.84866	1.7944		-0.57483	-0.401948	-1.00974	-0.963664	-0.199713	-0.825482	1.90375	-0.440668	0.0582476	1.27921	1.17484
Cyp17a1	0.926865	0.782782	1.60287	0.24117	0.78171	1.26231	1.94036	1.89295	1.87965	0.883212	2.74665		-0.597249	-0.79674	0.338718	-1.54663	-0.798224	-0.132806	0.805992	0.74035	0.721935	-0.657689	1.92235
Gm3219	1.64368	1.67137	0.697828	0.863595	0.592421	1.19213	2.16565	2.54535	2.21445	1.16179	2.24808		0.143534	0.18386	-1.23395	-0.992539	-1.38746	-0.514079	0.903703	1.45668	0.974773	-0.558264	1.02375
Kctd12	3.81966	3.36968	3.60346	2.58416	2.60742	2.4331	6.50609	5.82691	6.30448	8.05472	6.83838		-0.447716	-0.670848	-0.554923	-1.06036	-1.04883	-1.13527	0.884403	0.547618	0.784431	1.65232	1.04918
Pianp	2.02528	1.94948	2.44677	2.15268	2.343	2.6977	3.7081	4.23607	3.15727	2.45109	2.52603		-0.936038	-1.04129	-0.350791	-0.75914	-0.494877	-0.00236932	1.40059	2.13369	0.635753	-0.344792	-0.240737
Plekha6	2.31064	2.74326	2.63684	2.3576	2.21382	2.49486	4.50823	4.57912	4.21657	4.21081	4.36032		-1.00339	-0.577627	-0.682361	-0.957176	-1.09868	-0.822091	1.15937	1.22914	0.872336	0.866667	1.01381
Afp	1.18244	1.92422	1.51287	1.28487	1.0577	0.844602	3.11981	2.61092	2.27904	3.34731	2.75315		-0.92114	-0.0775892	-0.545376	-0.804657	-1.06299	-1.30533	1.28203	0.703325	0.325911	1.54075	0.865068
Pth1r	0.350719	0.16565	0.408296	0.269001	0.446045	0.498865	0.405256	0.788937	0.413734	0.204501	0.424082		-0.282643	-1.39521	0.0634883	-0.773902	0.290421	0.607955	0.0452129	2.35176	0.0961795	-1.16165	0.158388
Fbxo36	0.581326	0.64038	0.240634	0.283615	0.544762	0.304506	1.10635	0.636028	0.803804	0.445136	0.738296		0.0247371	0.255122	-1.30439	-1.13671	-0.117908	-1.05521	2.07299	0.238143	0.89268	-0.506574	0.637117
Il15	2.69165	1.92474	2.18002	1.98134	1.90286	2.17054	4.11855	3.88532	3.83061	3.74598	3.09009		-0.195179	-1.05564	-0.769218	-0.992133	-1.08019	-0.779854	1.40578	1.1441	1.08271	0.98776	0.251863
Fam3b	0.156338	0.602768	0.690287	0.762734	1.02553	0.573243	1.41329	0.684196	0.432339	0.877887	1.32368		-1.67699	-0.469931	-0.233297	-0.0374152	0.673133	-0.549761	1.72156	-0.249766	-0.930737	0.273936	1.47927
Pam	1.34904	1.729	1.05957	0.873334	0.984611	1.20945	2.1601	2.41835	2.65451	2.52952	2.15262		-0.581037	-0.0137235	-1.01324	-1.29131	-1.12516	-0.789457	0.629946	1.01554	1.36814	1.18152	0.618778
1810044D09Rik	2.86945	2.76582	2.57352	5.42474	2.35284	3.94552	3.58378	5.808	4.9595	5.30992	2.58135		-0.731876	-0.810505	-0.956411	1.20693	-1.12385	0.0845847	-0.189883	1.49773	0.853935	1.11981	-0.95047
1110051M20Rik	1.13974	1.25552	1.72987	1.0843	1.14816	1.43283	2.33178	2.02012	2.86293	2.41455	2.14711		-1.04172	-0.852991	-0.0797748	-1.13209	-1.02799	-0.563966	0.901371	0.393348	1.76717	1.03629	0.600349
Klra8	1.29814	0.894868	1.24682	0.709332	1.25483	0.610991	1.54942	2.09036	2.4141	0.469909	0.925534		0.122063	-0.542124	0.0375389	-0.847701	0.0507313	-1.00967	0.53592	1.42685	1.96004	-1.24203	-0.491618
Csf2ra	3.41272	2.64174	2.54533	2.03998	2.67946	1.64269	5.47095	4.35953	5.35647	5.61879	4.68565		-0.18051	-0.705969	-0.771677	-1.1161	-0.680261	-1.38687	1.22227	0.464785	1.14425	1.32303	0.687051
Egf	0.2666	0.305919	0.392377	0.390202	0.364337	0.407308	0.835062	0.515312	0.358389	0.499014	0.601932		-1.13666	-0.891327	-0.351861	-0.365432	-0.52682	-0.258697	2.41033	0.415207	-0.563934	0.313514	0.955684
Mllt4	0.317026	0.349231	0.334392	0.357458	0.402716	0.339505	0.643572	0.499475	0.629931	0.661732	0.691926		-1.03634	-0.825307	-0.922544	-0.771397	-0.474831	-0.889039	1.10345	0.159209	1.01406	1.22244	1.4203
Hist1h4d	5.22992	1.35558	3.05629	1.50091	2.88292	6.44588	2.34196	10.5016	4.25379	2.51274	3.90712		0.464668	-0.99785	-0.355852	-0.942989	-0.421297	0.923678	-0.625503	2.45466	0.0961902	-0.561036	-0.0346737
Zcwpw1	2.76234	3.4579	2.49478	3.45496	3.83583	3.26222	5.20937	4.79168	5.50936	6.81991	7.4417		-1.03561	-0.61085	-1.199	-0.612645	-0.380058	-0.730347	0.458729	0.203656	0.641926	1.44225	1.82196
4833422C13Rik	0.378101	0.493303	0.361689	0.556545	0.470477	0.318599	0.737479	0.59713	0.862713	0.912506	0.540773		-0.950713	-0.368759	-1.03362	-0.0492853	-0.484067	-1.25129	0.864721	0.155734	1.49735	1.74889	-0.128959
Akap2	0.360863	0.362286	0.176942	0.29853	0.294057	0.127079	0.50592	0.432586	0.665295	0.745135	0.584455		-0.271339	-0.264062	-1.21188	-0.590101	-0.612975	-1.46688	0.470462	0.0954422	1.28548	1.69377	0.872079
Dync2li1	0.36029	0.545724	0.497128	0.263665	0.168814	0.424631	0.599976	0.867224	1.03787	0.689708	0.57197		-0.739949	-0.00861776	-0.200275	-1.12103	-1.49511	-0.486195	0.205346	1.25934	1.93235	0.559239	0.0948936
Edaradd	2.26661	2.4616	2.17686	2.11169	1.96205	1.75745	3.82629	4.50585	4.07841	4.25566	3.83277		-0.710218	-0.526739	-0.794669	-0.855992	-0.996798	-1.18932	0.757387	1.39683	0.994624	1.16141	0.763485
Cyp2d22	0.276268	0.34784	0.435718	0.365883	0.314386	0.682382	0.601027	0.725618	0.58222	0.564246	0.60171		-1.42668	-0.969782	-0.408792	-0.8546	-1.18334	1.16585	0.646498	1.44185	0.526439	0.411698	0.650858
Aqp9	6.967	7.99577	6.72128	7.92181	7.76815	5.45371	12.9342	12.3134	14.3116	16.8373	15.9218		-0.859514	-0.606933	-0.919843	-0.625091	-0.662818	-1.23105	0.605541	0.453123	0.943717	1.56382	1.33905
Tbc1d19	0.651543	0.358865	0.337124	0.556276	0.496082	0.362617	0.968739	0.570282	0.919662	1.16411	0.913668		-0.042157	-1.0704	-1.14678	-0.37685	-0.588325	-1.05722	1.07222	-0.327644	0.899803	1.7586	0.878744
Gm5124	0.629339	0.315123	0.505228	0.446602	0.428913	0.119875	0.925517	0.82627	0.89656	1.4311	1.23524		-0.190749	-0.978407	-0.501863	-0.648823	-0.693165	-1.46784	0.551693	0.302906	0.479105	1.81906	1.32809
Olfm1	0.432927	0.411874	0.555354	0.184003	0.247918	0.0853933	1.12565	0.499749	0.962378	0.849011	0.90816		-0.395121	-0.456114	-0.0404343	-1.11629	-0.931116	-1.40197	1.61179	-0.201529	1.13877	0.810328	0.98169
Rgs10	15.9037	16.606	17.1391	14.4884	12.8551	12.3182	33.5665	27.9723	30.2235	42.8631	34.2697		-0.714394	-0.648113	-0.5978	-0.847967	-1.00211	-1.05279	0.952578	0.424611	0.637073	1.82997	1.01894
Tctex1d2	1.53975	0.782844	0.653705	1.38684	0.776947	1.11675	1.6906	2.28074	1.52853	0.967404	0.902543		0.60787	-0.920889	-1.18172	0.29903	-0.932799	-0.246483	0.912549	2.10448	0.585208	-0.548124	-0.679127
Rac3	1.09947	0.828687	0.702631	0.508172	1.03031	0.727473	1.04623	2.12728	1.70694	0.708961	0.930898		0.128603	-0.437116	-0.700472	-1.10674	-0.0158859	-0.648572	0.0173741	2.2759	1.39773	-0.687247	-0.223577
Dusp23	1.25084	1.5157	1.3347	1.13914	1.44567	0.655208	3.17406	2.44514	1.99859	2.59671	2.32994		-0.735744	-0.385858	-0.624963	-0.883302	-0.478369	-1.52259	1.80487	0.841952	0.25205	1.04218	0.68977
Zcchc24	0.460775	0.561013	0.361389	0.556087	0.363616	0.444611	0.773079	0.891521	0.916555	0.990393	1.16012		-0.78934	-0.428298	-1.14731	-0.44604	-1.13929	-0.84756	0.335532	0.762142	0.85231	1.11826	1.72959
Tmem37	7.09177	7.26396	6.2488	7.5875	7.05378	6.25644	12.8456	13.9391	11.8129	13.2742	14.0631		-0.799159	-0.747722	-1.05097	-0.651073	-0.810508	-1.04869	0.919647	1.2463	0.611155	1.04768	1.28334
Ccl6	2.381	2.17066	2.90013	2.88405	2.38512	3.18251	5.50801	4.85079	3.6328	2.51475	3.89286		-0.851195	-1.04596	-0.370495	-0.385384	-0.84738	-0.109018	2.04433	1.43576	0.307938	-0.727346	0.548747
Rnf122	1.27083	1.09994	1.1523	1.65335	1.60204	1.52155	2.24583	2.19818	2.17557	2.33237	2.19041		-1.04695	-1.40718	-1.29681	-0.240602	-0.348763	-0.518434	1.00834	0.907893	0.860231	1.19076	0.891513
Dstyk	1.30102	1.46924	1.38192	1.24552	1.57191	1.28584	2.74856	2.48521	2.58714	2.53129	2.36244		-0.97277	-0.702449	-0.842768	-1.06196	-0.537463	-0.997163	1.35335	0.930164	1.09396	1.00421	0.732879
Klra3	1.63061	0.718221	2.17646	0.783103	1.9202	1.63822	1.95274	4.51201	2.08684	0.876106	0.964962		-0.112624	-0.967144	0.398605	-0.906378	0.158599	-0.105497	0.189075	2.58602	0.314669	-0.819273	-0.736053
Klri2	0.340901	0.390553	0.496716	0.372551	0.511135	0.385708	0.934254	0.930957	0.477652	0.529035	0.496451		-0.927429	-0.688045	-0.17621	-0.774837	-0.106693	-0.711404	1.93326	1.91736	-0.268122	-0.0203929	-0.177488
Vmn2r29	0.797612	0.559132	0.640316	0.636767	0.679494	0.531745	1.34548	1.1424	1.32254	1.09474	1.07438		-0.309757	-1.083	-0.81977	-0.831278	-0.692741	-1.1718	1.46664	0.808176	1.39226	0.653644	0.587629
Tmem8b	0.254541	0.280398	0.25654	0.410348	0.414836	0.336228	0.547617	0.416528	0.550887	0.338971	0.543472		-1.23927	-1.01192	-1.22169	0.130658	0.170118	-0.52104	1.33759	0.184995	1.36634	-0.496923	1.30115
Fam161a	0.729601	0.578676	0.354359	0.484098	0.601665	0.611479	1.22192	0.91959	1.04918	0.804491	0.691867		-0.00764895	-0.603408	-1.48887	-0.976744	-0.512661	-0.473922	1.93572	0.742311	1.25385	0.287971	-0.1566
Acvr1b	1.74457	2.52009	1.78039	2.23222	2.40599	1.93111	4.47912	3.03957	4.09624	4.16722	3.49765		-1.13969	-0.374383	-1.10434	-0.658462	-0.48698	-0.955606	1.55884	0.138255	1.18101	1.25105	0.590301
Aldh1b1	0.964271	0.584224	0.904739	1.17611	1.28766	1.06071	1.90397	1.49811	1.31108	2.0182	1.87779		-0.789461	-1.61872	-0.919359	-0.32723	-0.0838289	-0.579032	1.26095	0.375371	-0.0327267	1.5102	1.20383
Slc41a2	0.278157	0.373025	0.387138	0.342215	0.498656	0.595479	0.598424	0.730394	0.668886	0.407462	0.532457		-1.46783	-0.816734	-0.719873	-1.02819	0.0454987	0.710016	0.730228	1.63597	1.21382	-0.580385	0.277482
Tbc1d16	0.566597	0.591304	0.452615	0.727444	0.663699	0.421755	0.915153	1.14194	1.04458	1.40052	1.10463		-0.794705	-0.717504	-1.15086	-0.292113	-0.491295	-1.24729	0.294412	1.00304	0.698827	1.81102	0.886463
Cdc20b	0.671361	0.287607	0.452878	0.32754	0.524278	1.44574	0.425901	1.43642	0.893914	0.152319	0.410531		0.0732853	-0.794525	-0.420786	-0.704222	-0.259324	1.82444	-0.481791	1.80337	0.576561	-1.10046	-0.516548
4930432K21Rik	0.556295	0.87036	0.434353	0.7232	0.73749	0.679571	1.53826	1.12936	0.981022	1.37608	0.725524		-0.967964	-0.0473166	-1.32542	-0.4787	-0.43681	-0.606594	1.91056	0.711913	0.277077	1.43515	-0.471887
Pecr	1.59821	2.04453	1.93489	2.11281	1.88419	1.83636	3.9247	3.88076	3.23162	4.00035	3.92857		-1.14513	-0.705793	-0.813717	-0.638581	-0.863623	-0.910705	1.14495	1.1017	0.462718	1.21942	1.14876
Emilin2	0.245648	0.270602	0.256091	0.306272	0.217408	0.285941	0.584381	0.441966	0.503198	0.571263	0.43908		-0.94472	-0.762064	-0.86828	-0.500971	-1.15143	-0.649788	1.5347	0.492266	0.940465	1.43868	0.471141
C030037D09Rik	0.296805	0.58852	0.2621	0.405451	0.389391	0.684069	0.790811	0.779361	0.71135	0.848479	0.603117		-1.35201	0.0499219	-1.51879	-0.829874	-0.907055	0.509113	1.0221	0.967069	0.64022	1.29924	0.120072
Alox8	1.61501	1.50676	1.83728	2.05825	1.69874	1.86457	3.43428	3.27432	3.25088	3.8698	3.66964		-1.00529	-1.12135	-0.766994	-0.530089	-0.915524	-0.737736	0.945169	0.773674	0.748544	1.4121	1.1975
Bmpr1a	0.546303	0.443431	0.476077	0.598519	0.493979	0.582363	0.893776	1.11572	0.945326	1.17423	0.892629		-0.729796	-1.11336	-0.99164	-0.535103	-0.924891	-0.595342	0.565792	1.39333	0.758002	1.61149	0.561516
Serpinb1a	1.74095	1.69026	1.69372	1.90027	2.54395	3.02946	3.22905	4.08072	3.07362	2.19922	4.42207		-0.987192	-1.03985	-1.03626	-0.821679	-0.152982	0.351399	0.558746	1.44352	0.397275	-0.51111	1.79813
Cnr2	2.26901	2.91005	2.08082	2.81704	2.65266	2.06844	5.99327	4.31462	4.40681	5.86717	6.11937		-0.924377	-0.530294	-1.04007	-0.587472	-0.688526	-1.04768	1.36513	0.333173	0.389847	1.28761	1.44265
1810006J02Rik	0.54566	0.8265	0.263515	0.299491	0.575257	0.321552	1.03847	1.19401	1.1003	1.42757	1.155		-0.604354	0.0757737	-1.28764	-1.20052	-0.532678	-1.14709	0.589115	0.965796	0.738853	1.53142	0.871323
Mmp25	0.414951	0.334037	0.140935	0.124581	0.254249	0.284236	0.546725	0.754333	0.514909	0.179237	0.283767		0.343697	-0.0739256	-1.07059	-1.15499	-0.485737	-0.330964	1.02382	2.09536	0.859612	-0.872898	-0.333385
Tdrp	5.05984	5.42586	5.01684	3.73563	4.21708	3.30715	11.0784	9.46503	11.1239	13.4863	11.8854		-0.675007	-0.578439	-0.686352	-1.02438	-0.897354	-1.13742	0.912882	0.487223	0.924886	1.54816	1.12579
Kazald1	0.25804	0.426378	0.237362	0.293746	0.362714	0.315384	0.777557	0.639927	0.475724	0.614717	0.400541		-1.02318	-0.0583235	-1.1417	-0.818528	-0.423225	-0.694506	1.95452	1.16567	0.224512	1.02118	-0.206413
Yes1	2.06952	2.37437	2.25479	1.9914	1.84987	1.68	4.84046	3.94574	5.14088	5.32401	4.57574		-0.817792	-0.611322	-0.692312	-0.870701	-0.966557	-1.08161	1.05892	0.45294	1.26239	1.38642	0.879628
Unc5a	3.72949	3.85711	2.78399	3.07618	3.0549	2.88114	7.57012	6.43474	7.60534	8.87547	8.35991		-0.635239	-0.583404	-1.01927	-0.900589	-0.909232	-0.979807	0.924683	0.463533	0.938988	1.45487	1.24547
Tusc1	0.435998	0.288173	0.192508	0.51051	0.367717	0.36541	0.788282	0.648753	0.482286	0.578681	0.516811		-0.205376	-1.08618	-1.65619	0.238597	-0.612223	-0.625969	1.89368	1.06231	0.0704269	0.644789	0.276141
Kcnj8	31.3806	29.4575	35.6521	34.4502	32.799	41.5279	59.6492	74.8586	67.7934	51.246	54.6926		-0.965047	-1.08633	-0.695655	-0.771455	-0.875592	-0.325084	0.817777	1.77699	1.33141	0.28781	0.505177
Abca1	0.513005	0.58728	0.632895	0.956962	0.796517	0.83777	0.918896	1.44391	1.32595	1.46859	0.826119		-1.26268	-1.04152	-0.905707	0.0591944	-0.418527	-0.295697	-0.0541462	1.50907	1.15785	1.58255	-0.330387
Morn3	0.209856	0.308233	0.540511	0.204768	0.0655523	0.219851	0.599083	1.04087	0.644822	0.357094	0.236908		-0.687416	-0.336383	0.492441	-0.705571	-1.20233	-0.651752	0.70144	2.27784	0.864648	-0.162035	-0.590888
March3	1.69674	1.43777	0.972481	1.62376	1.6206	1.40153	3.01181	2.79888	3.06797	3.09818	2.62455		-0.535511	-0.860767	-1.44515	-0.627171	-0.63114	-0.906283	1.11617	0.848734	1.1867	1.22464	0.629782
Gamt	0.205036	0.150576	0.452652	0.133376	0.384279	0.1432	0.715392	0.658032	0.378005	0.139556	0.462932		-0.673052	-0.930253	0.496376	-1.01148	0.173468	-0.965088	1.73723	1.46633	0.143837	-0.982298	0.544926
Bend6	0.314889	0.346877	0.347586	0.401792	0.408577	0.558269	0.96807	0.53003	0.692173	1.06339	0.820339		-1.02904	-0.907872	-0.905187	-0.699852	-0.67415	-0.10711	1.44524	-0.21408	0.400125	1.80631	0.885624
Ttc8	0.318173	0.161728	0.243129	0.143244	0.252274	0.102502	0.719351	0.364192	0.494535	0.924695	0.660714		-0.299756	-0.882878	-0.57947	-0.951774	-0.545384	-1.10363	1.19557	-0.128229	0.357603	1.96095	0.977006
1700101E01Rik	0.417404	0.459805	0.460746	0.271521	0.260767	0.437283	0.92678	0.974252	1.02604	0.710259	1.35473		-0.686133	-0.567963	-0.565341	-1.0927	-1.12267	-0.630731	0.733473	0.865775	1.01011	0.13004	1.92615
Cdr2l	0.217003	0.350602	0.127753	0.211741	0.271138	0.348585	0.412989	0.468514	0.64011	0.384025	0.783923		-0.862435	-0.169607	-1.32527	-0.889723	-0.581697	-0.180067	0.153924	0.44187	1.33175	0.00372063	2.07754
Akr1c12	0.393968	0.162746	0.271798	0.0480519	0.184594	0.36114	0.656059	0.301728	0.862509	0.301672	0.625435		0.0613941	-0.891061	-0.441851	-1.36351	-0.801064	-0.0738318	1.14101	-0.318563	1.99142	-0.318794	1.01486
Fcrlb	0.515123	0.361105	0.361844	0.36555	0.131652	0.294358	0.891234	1.18867	0.647513	0.38249	0.515443		0.0034542	-0.511197	-0.508727	-0.496344	-1.27791	-0.734232	1.26023	2.25411	0.445835	-0.439739	0.00452348
Bex2	0.217373	0.319272	0.159963	0	0.339501	0	0.551591	0.317103	0.667917	0.517838	0.306742		-0.42932	0.0489363	-0.69877	-1.44955	0.14388	-1.44955	1.13931	0.0387562	1.68528	0.980893	-0.00987243
Sbf2	0.312513	0.168127	0.272762	0.404216	0.292857	0.296941	0.608591	0.534349	0.535955	0.526829	0.523044		-0.650785	-1.64603	-0.924787	-0.0186787	-0.786273	-0.758122	1.39007	0.878324	0.889394	0.826489	0.800399
Cnrip1	2.42461	1.91972	1.50546	1.18291	1.70408	1.62724	4.86675	3.81334	4.5748	5.80183	4.71518		-0.406311	-0.708589	-0.956607	-1.14972	-0.837693	-0.883697	1.0558	0.425122	0.881009	1.61563	0.965054
Rwdd3	0.613735	0.480288	0.655723	0.657474	0.752665	0.498286	1.88584	1.35168	0.767272	1.61465	1.00677		-0.675387	-0.955978	-0.587101	-0.583419	-0.383267	-0.918135	1.99939	0.876246	-0.352554	1.42918	0.151024
Naip5	0.377731	0.470853	0.515706	0.601353	0.512329	0.572754	1.02157	1.09627	1.04458	1.02502	1.06886		-1.30323	-0.981712	-0.826848	-0.531134	-0.838508	-0.629878	0.919752	1.17767	0.999199	0.931664	1.08303
Gpr15	0.325994	0.307809	0.565471	0.408972	0.30549	0.34152	1.06357	0.692959	1.0303	0.665659	1.26177		-0.8916	-0.94431	-0.197455	-0.651081	-0.951032	-0.846596	1.24633	0.17208	1.14989	0.0929484	1.82083
Rnf130	7.66919	6.01892	6.55837	5.78886	6.20331	4.83997	15.6117	16.1368	15.3028	20.252	17.0921		-0.585017	-0.871164	-0.777627	-0.911056	-0.839192	-1.07559	0.792172	0.883221	0.73861	1.59677	1.04887
Trio	1.22264	1.39125	1.35454	0.970128	1.03243	0.73662	3.43065	2.83414	3.05911	3.818	3.86015		-0.752924	-0.616825	-0.646457	-0.956747	-0.906458	-1.14523	1.02934	0.547846	0.729438	1.342	1.37602
Efnb1	0.336746	0.282632	0.354013	0.312934	0.34562	0.21839	0.579844	1.0246	0.694737	0.982306	0.801042		-0.691257	-0.875885	-0.632345	-0.7725	-0.66098	-1.09507	0.138155	1.65559	0.530151	1.51129	0.892847
Txnrd3	0.3459	0.359855	0.530281	0.563375	0.396545	0.603932	0.932556	1.04281	1.01862	0.824101	0.813483		-1.25993	-1.2066	-0.555302	-0.42883	-1.06639	-0.273837	0.982033	1.40338	1.31094	0.567561	0.526983
Hist2h2bb	0.52499	0.771094	0.772672	0.683013	0.32798	0.549994	0.999136	3.21659	0.806564	0.535998	1.03716		-0.513928	-0.201303	-0.199298	-0.313192	-0.76419	-0.482166	0.0883787	2.90521	-0.156245	-0.499945	0.136681
Nucb2	0.749272	0.675316	0.714292	0.631407	0.670229	0.499518	1.8797	1.66937	1.66392	1.35611	1.23995		-0.632475	-0.779186	-0.701867	-0.866291	-0.789277	-1.12793	1.61002	1.19278	1.18197	0.571345	0.340912
Adgrg3	2.53559	2.54378	2.37405	2.98218	2.48219	3.27301	5.70888	6.55897	6.05199	5.96339	5.9038		-0.948078	-0.943458	-1.03921	-0.696139	-0.978203	-0.532071	0.842097	1.32167	1.03566	0.985676	0.952059
Klra9	2.75867	1.51945	2.594	1.79452	2.53729	2.62246	3.74318	7.73569	5.79229	2.13846	3.33055		-0.303627	-0.968914	-0.392032	-0.82124	-0.422477	-0.376753	0.224916	2.36833	1.325	-0.636593	0.00339149
Atp6v0a1	0.320751	0.161931	0.221277	0.195597	0.237947	0.210007	0.784216	0.538389	0.455835	0.529259	0.483929		-0.282481	-1.09034	-0.788466	-0.91909	-0.703672	-0.845792	2.07498	0.824558	0.404638	0.778117	0.547541
Apol10b	0.482487	0.406441	0.407273	0.74772	0.691507	0.475732	1.32335	1.01851	0.941841	1.39088	1.7542		-0.866362	-1.03363	-1.0318	-0.282954	-0.4066	-0.881221	0.983207	0.312678	0.144036	1.13175	1.93091
Klra23	0.541945	0.533502	0.511569	0	0.408787	0.667462	0.832876	2.60398	0.612099	0.988922	0.36805		-0.285778	-0.29837	-0.331081	-1.09403	-0.48437	-0.0985827	0.148115	2.78953	-0.181151	0.380842	-0.545125
4833419F23Rik	0.29882	0.246882	0.329849	0.583148	0.420038	0.313052	0.497613	0.980817	0.895226	1.0678	0.695765		-0.938985	-1.11534	-0.833628	0.0264281	-0.527399	-0.890661	-0.263999	1.37668	1.08606	1.67202	0.40881
St6gal1	0.580967	0.462686	0.272396	0.273267	0.222138	0.346663	1.10237	1.10087	1.38893	1.11084	0.903525		-0.29477	-0.573896	-1.02295	-1.0209	-1.14155	-0.847693	0.935664	0.932124	1.6119	0.955651	0.466419
Lmbr1	0.192549	0.259244	0.259775	0.240069	0.170414	0.268959	0.692183	0.692862	0.562059	0.895559	0.733623		-0.976926	-0.725381	-0.723378	-0.797701	-1.06041	-0.68874	0.907481	0.910042	0.416709	1.67453	1.06377
Atp6v0d2	0.197992	0.193871	0.339969	0.386382	0.288616	0.345703	0.983891	0.731705	0.304184	0.718733	0.74505		-1.03634	-1.0517	-0.507104	-0.334094	-0.698528	-0.48573	1.89319	0.953137	-0.640496	0.904783	1.00288
Qser1	0.196054	0.222322	0.210047	0.225059	0.140494	0.169146	0.532246	0.565278	0.653795	0.600495	0.434517		-0.822538	-0.689973	-0.75192	-0.67616	-1.10293	-0.958333	0.874103	1.0408	1.48752	1.21853	0.380899
Ptpdc1	0.168224	0.317682	0.198956	0.187597	0.168903	0.100705	0.651754	0.599496	0.675669	0.883304	0.620604		-0.905098	-0.358522	-0.792709	-0.83425	-0.902614	-1.15202	0.863198	0.672087	0.950656	1.70999	0.749281
0610043K17Rik	0.610806	0.403713	0.404539	0.953591	0.91582	0.639897	2.32491	1.17618	0.563044	0.748336	0.827452		-0.482301	-0.867886	-0.866348	0.155927	0.0856017	-0.428137	2.70917	0.570364	-0.571229	-0.226235	-0.07893
Gpx7	0.150225	0.275809	0.165824	0	0.140776	0.10492	0.810052	0.482125	0.415434	0.562373	0.635962		-0.737202	-0.250174	-0.676707	-1.31979	-0.773846	-0.9129	1.82168	0.549942	0.291307	0.861153	1.14654
Fam114a1	0.479045	0.527708	0.427098	0.53934	0.587041	0.25093	1.35001	1.58043	1.20587	1.61776	1.16999		-0.806579	-0.709897	-0.909786	-0.686787	-0.592016	-1.25979	0.923828	1.38162	0.637455	1.45579	0.566169
Cd244	0.298846	0.125411	0.0628338	0.485999	0.466749	0.50689	0.230208	0.672618	0.616545	0.159821	0.253027		-0.260215	-1.09929	-1.40204	0.645232	0.5521	0.746302	-0.592286	1.54809	1.27681	-0.932818	-0.481887
2900005J15Rik	0.221218	0.152306	0.213665	0.0809451	0.310956	0.0289692	0.789397	0.484068	0.611759	0.592873	0.561903		-0.584297	-0.858606	-0.614363	-1.14266	-0.227089	-1.34956	1.67738	0.461995	0.970278	0.895101	0.771823
Ptk2	0.168187	0.164005	0.213711	0.222782	0.14635	0.0881004	0.661333	0.431119	0.720201	0.723672	0.64686		-0.820216	-0.836366	-0.644407	-0.609376	-0.904548	-1.1295	1.08426	0.195197	1.3116	1.325	1.02836
1700096J18Rik	0.202295	0.222845	0.223301	0.394779	0	0	0.577497	1.06239	0.559429	0.206536	0.513837		-0.512406	-0.445748	-0.444269	0.111955	-1.16859	-1.16859	0.704638	2.27749	0.646031	-0.49865	0.498144
Hist2h4	0.561343	0.309183	0	0.821597	0.526036	1.17616	0.534161	1.71966	0.776173	0.286557	0.950556		-0.285536	-0.818282	-1.4715	0.26431	-0.36013	1.01341	-0.342964	2.16167	0.168342	-0.866084	0.536766
Lrg1	0.132052	0.242443	0.340115	0.343598	0.371237	0.415022	0.963371	0.963183	0.568053	0.0449401	0.260879		-0.963516	-0.597012	-0.272736	-0.261172	-0.169409	-0.0240405	1.79651	1.79588	0.48403	-1.25273	-0.535803
Ldlr	0.55724	0.322002	0.280942	0.118256	0.0985702	0.0761792	0.956094	1.50322	1.9816	1.13395	2.38445		-0.369024	-0.659896	-0.710667	-0.911829	-0.93617	-0.963857	0.124159	0.800682	1.3922	0.344079	1.89032
Mapk12	0.509959	0.528718	0.629137	0.234161	0.505994	0.377115	2.05524	2.41557	2.10155	1.74571	1.90488		-0.795008	-0.772835	-0.654138	-1.121	-0.799695	-0.952031	1.03153	1.45744	1.08627	0.665663	0.853803
Xcl1	4.58222	4.11294	4.49603	2.81514	4.29401	2.13354	19.2178	15.4487	21.7453	23.738	28.5946		-0.739244	-0.786487	-0.747921	-0.917139	-0.768258	-0.985758	0.734152	0.354709	0.988601	1.18921	1.67813
Cdh1	0.865166	1.12513	0.596877	0.973159	0.934613	0.553893	4.48226	3.33405	4.45279	5.26303	4.50703		-0.832247	-0.696804	-0.972028	-0.775982	-0.796065	-0.994423	1.05229	0.454061	1.03693	1.45907	1.06519
Pros1	0.247437	0.181715	0.254922	0.289724	0.185499	0.328347	1.22437	1.25614	1.15565	1.58312	1.45253		-0.852603	-0.965958	-0.839693	-0.779668	-0.959431	-0.713053	0.832372	0.887167	0.713846	1.45113	1.22589
Gm5544	0	0.162192	0.162524	0.359163	0.137975	0.231372	0.98074	0.451052	0.339306	0.450968	0.623306		-1.2986	-0.704325	-0.703109	0.0173859	-0.793058	-0.450846	2.29487	0.354072	-0.0553711	0.353764	0.985219
Car11	0	0.270454	0.180672	0.279487	0.191726	0.0428677	0.856624	1.21773	1.24474	1.00265	1.24723		-1.15002	-0.626416	-0.800234	-0.608929	-0.778834	-1.06702	0.508408	1.20751	1.2598	0.791114	1.26462
Plat	0.0645652	0.308204	0.190052	0.272998	0.181512	0.248014	2.21179	1.99678	1.60694	2.04349	1.6582		-1.01604	-0.745696	-0.8768	-0.784762	-0.886277	-0.812485	1.36656	1.12798	0.69541	1.17982	0.752289
Tuba8	0.0411855	0.0907386	0.0454621	0.160747	0.192975	0.302029	0.783823	0.396537	0.7593	0.378441	1.01126		-1.01438	-0.865319	-1.00151	-0.654732	-0.55779	-0.229753	1.2195	0.0545297	1.14573	9.64755e-05	1.90363
Clec4a1	0.971176	0.493768	0.53601	1.2392	0.980098	0.782638	0.959692	0.882744	0.447617	0.114408	0.569267		0.764166	-0.718663	-0.58746	1.59665	0.791877	0.178567	0.728496	0.489496	-0.862008	-1.89696	-0.484163
Rnf114	55.2051	54.3792	56.0274	83.2257	85.2838	80.074	52.1017	53.2737	56.8223	53.1319	59.1115		-0.560346	-0.6229	-0.498064	1.56196	1.71784	1.32325	-0.7954	-0.706632	-0.437858	-0.717372	-0.264472
Cars	8.51115	9.29793	9.02009	13.8773	13.6753	12.7187	9.44246	9.52676	9.36376	10.1377	9.84355		-1.01735	-0.613316	-0.755995	1.73832	1.63459	1.14335	-0.539096	-0.495805	-0.57951	-0.182069	-0.333124
5430421N21Rik	0.683898	0.538122	0.431379	1.2393	0.732437	0.511764	0.650781	0.256544	0.27018	0.199496	0.827204		0.356417	-0.127202	-0.481327	2.19899	0.517448	-0.214646	0.24655	-1.06135	-1.01611	-1.25061	0.831842
Trim12c	47.6693	54.0734	54.8953	76.3439	83.1828	76.0443	58.1533	48.205	49.3537	51.5635	51.0661		-0.886653	-0.391676	-0.32815	1.32963	1.85821	1.30647	-0.0763372	-0.845248	-0.756465	-0.585668	-0.624112
Mndal	114.686	124.702	125.154	183.091	191.498	174.284	126.051	111.709	116.088	119.152	122.66		-0.750312	-0.416346	-0.401275	1.53054	1.81085	1.23688	-0.371366	-0.849575	-0.703565	-0.601401	-0.484433
Ly6f	2.02903	2.15236	2.40562	2.85974	3.23943	3.85768	2.21681	3.02572	3.048	2.76209	2.35421		-1.25172	-1.0292	-0.572256	0.247093	0.932151	2.04763	-0.912917	0.546563	0.586762	0.0709072	-0.665013
Ogfrl1	0.806603	0.972592	0.709881	1.18056	1.23595	1.34746	1.10983	0.810949	0.854055	0.923672	1.14438		-0.978963	-0.174992	-1.44744	0.832305	1.10059	1.64069	0.489723	-0.957913	-0.749128	-0.411937	0.657067
Cd200r4	3.38074	4.54349	4.17961	6.39959	6.4946	5.4543	6.36972	4.70495	4.33177	5.7297	6.69803		-1.6989	-0.668992	-0.991299	0.97505	1.05921	0.137758	0.948593	-0.525979	-0.856524	0.381694	1.23939
Mettl1	11.9219	12.0725	9.31813	15.3177	19.3602	15.8254	14.6563	12.833	13.993	19.0516	15.4858		-0.86868	-0.81853	-1.73575	0.262141	1.60832	0.431209	0.0418913	-0.565279	-0.178992	1.50555	0.31812
Cdkn2b	0.4679	0.656004	0.28172	0.871603	0.637775	0.623871	0.566673	0.707393	0.431313	0.434283	0.540221		-0.608326	0.566005	-1.77064	1.91199	0.452202	0.365399	0.00831282	0.886826	-0.836738	-0.818196	-0.156827
Bcl2l11	14.6207	17.3867	15.5692	19.0335	24.2461	28.9806	16.4409	13.6513	14.0819	17.6583	16.6422		-0.731501	-0.137732	-0.527889	0.215781	1.33475	2.35109	-0.340764	-0.939599	-0.847163	-0.0794287	-0.297552
Sh3bp2	7.77142	6.74315	7.32623	11.0297	10.9167	11.2419	7.79791	7.49417	7.90652	6.52359	10.6548		-0.483248	-1.03423	-0.721796	1.26265	1.2021	1.37635	-0.469054	-0.631808	-0.410857	-1.15188	1.06177
Nek6	0.426587	0.451124	0.583806	0.715858	0.719559	0.786472	0.373455	0.507722	0.471798	0.400444	0.361105		-0.663135	-0.501227	0.374278	1.24563	1.27005	1.71157	-1.01373	-0.127764	-0.364809	-0.83564	-1.09522
Optn	0.366327	0.226991	0.505457	0.536166	0.536384	0.599647	0.261441	0.180359	0.168841	0.397383	0.368317		-0.0697686	-0.978176	0.837296	1.0375	1.03893	1.45137	-0.753578	-1.2822	-1.35729	0.132702	-0.0567947
Slfn3	3.82771	3.87092	3.84421	5.14312	6.49767	5.98214	4.62758	4.03685	4.16466	4.32438	5.25973		-0.93767	-0.890628	-0.919707	0.494396	1.96907	1.40782	-0.066864	-0.709983	-0.570838	-0.396953	0.621348
Tnf	9.94766	12.8081	10.7229	20.2984	18.4478	12.4289	11.6961	10.014	9.81328	10.1583	11.3186		-0.720457	0.0825625	-0.502822	2.18534	1.66581	-0.0238914	-0.229612	-0.701833	-0.758182	-0.661324	-0.335589
Psme2	224.007	210.915	220.965	344.719	322.788	335.109	233.248	227.51	221.598	242.907	274.322		-0.706114	-0.9642	-0.766081	1.67352	1.24118	1.48407	-0.523943	-0.637058	-0.753603	-0.333533	0.28576
Uba7	52.4911	54.4519	53.9594	82.0325	82.8851	81.1252	51.8203	47.845	49.742	51.5842	50.697		-0.514995	-0.378252	-0.412599	1.54517	1.60463	1.4819	-0.561776	-0.839006	-0.706713	-0.578241	-0.640113
BC020402	0.637298	0.898608	1.04114	1.5173	1.40942	1.01483	1.26139	1.20488	0.963442	0.884899	0.647505		-1.43052	-0.51072	-0.00901491	1.66704	1.28731	-0.101625	0.766254	0.567342	-0.282508	-0.558975	-1.39459
Slc15a1	0.623754	0.973417	0.650273	1.11582	1.07162	1.25247	0.807887	0.636952	0.654838	0.90218	0.792181		-1.08967	0.509961	-0.968351	1.16142	0.959218	1.78657	-0.247302	-1.02929	-0.947467	0.184067	-0.319154
Samd9l	62.4184	68.4113	69.9674	97.9966	111.408	98.247	77.6795	75.865	76.0679	80.0695	79.4356		-1.29373	-0.889466	-0.784495	1.10628	2.01097	1.12317	-0.264259	-0.38666	-0.372973	-0.103036	-0.145797
Fignl1	1.1113	0.863994	1.12879	1.00061	1.81321	1.94421	1.27265	0.9623	0.967356	1.46694	4.37399		-0.423256	-0.669229	-0.40586	-0.533349	0.27487	0.405164	-0.262776	-0.571453	-0.566424	-0.0695331	2.82185
1110038B12Rik	15.6961	13.1259	11.858	21.4454	21.9641	18.971	16.4441	17.4606	21.9183	19.1218	20.8245		-0.679657	-1.41383	-1.77601	0.96263	1.1108	0.255818	-0.465991	-0.175628	1.09771	0.298894	0.78527
Igsf10	0.849763	0.868416	1.00016	1.25872	1.19927	1.71075	0.691706	0.864757	0.618163	0.444243	0.654475		-0.206994	-0.154755	0.214201	0.938313	0.77182	2.20425	-0.649642	-0.165003	-0.855603	-1.34268	-0.753909
Irf1	146.334	138.843	148.714	240.595	208.61	217.436	168.277	147.046	158.029	138.484	156.583		-0.665221	-0.876635	-0.598052	1.99505	1.09236	1.34145	-0.0459359	-0.645127	-0.33516	-0.886767	-0.375969
Ticrr	0.390606	0.414349	0.343336	0.543469	0.698183	0.522878	0.289093	0.335558	0.393401	0.243709	0.839044		-0.360132	-0.228944	-0.621315	0.484489	1.33934	0.370716	-0.921026	-0.664291	-0.344688	-1.17179	2.11764
Ly6c1	30.9378	33.05	29.7757	52.0404	46.5618	45.5072	31.6023	31.0535	28.2677	29.6706	27.304		-0.479699	-0.234503	-0.614602	1.97001	1.33402	1.2116	-0.40256	-0.466268	-0.789659	-0.626802	-0.90153
Slamf1	8.69403	8.38847	8.67533	12.0593	13.7758	13.8008	7.84679	8.4473	8.93386	7.94088	10.0848		-0.522484	-0.657438	-0.530743	0.963819	1.72193	1.73297	-0.896676	-0.631455	-0.416561	-0.85512	0.0917624
Ctrl	1.55275	1.46613	1.63237	2.8859	1.87083	2.40133	2.1108	1.55325	1.70397	1.43433	2.25374		-0.742183	-0.92901	-0.570454	2.13323	-0.0561311	1.08808	0.461449	-0.741105	-0.416024	-0.997598	0.76975
Gm20172	0.788487	0.868585	0.870363	1.31891	1.1963	1.37673	0.857492	0.755874	0.865275	0.575014	1.08087		-0.682147	-0.362545	-0.355451	1.43431	0.945081	1.66502	-0.406808	-0.812277	-0.375753	-1.53393	0.4845
Foxn3	17.2509	18.0312	19.1582	25.8127	27.2516	30.7739	14.876	17.1776	17.1416	15.1456	15.9047		-0.479722	-0.336572	-0.129817	1.09099	1.35497	2.00115	-0.915412	-0.49317	-0.499774	-0.865952	-0.726691
Apobec1	6.6846	6.41888	6.00332	10.3017	9.36345	9.76212	8.37265	6.54855	6.73173	6.55356	5.7614		-0.499234	-0.661888	-0.916261	1.71488	1.14055	1.38459	0.53406	-0.582514	-0.470385	-0.579447	-1.06435
Insl6	18.3001	14.7834	19.221	27.488	24.6323	28.4671	25.3294	26.3079	22.9011	21.8544	27.1386		-1.14863	-1.95471	-0.937541	0.957387	0.302815	1.18181	0.462602	0.686889	-0.0940036	-0.333924	0.877299
Smurf2	11.2063	12.2034	11.0415	16.575	18.2758	18.2404	11.4991	11.0174	12.5033	11.1492	11.3089		-0.666159	-0.330243	-0.721679	1.14252	1.7155	1.70358	-0.567517	-0.729798	-0.229209	-0.685395	-0.631594
Gpr18	54.5998	59.5922	55.5246	92.0057	87.9757	81.5846	56.4814	56.8758	59.7726	60.1799	59.5474		-0.80004	-0.444409	-0.734162	1.86455	1.57747	1.12221	-0.666005	-0.63791	-0.431558	-0.402545	-0.4476
1600014C10Rik	24.7551	24.4915	24.1946	35.2947	39.9225	38.0901	26.7683	27.2192	24.5464	27.339	27.2077		-0.744336	-0.789752	-0.840904	1.07152	1.86884	1.55314	-0.397484	-0.319798	-0.780293	-0.299158	-0.32178
Gbp8	35.549	35.9978	36.2942	55.1052	52.9226	58.4125	36.1539	32.8821	33.0587	33.8442	36.859		-0.525301	-0.479025	-0.448463	1.49114	1.26609	1.83216	-0.462929	-0.800285	-0.782076	-0.701083	-0.390226
P2rx7	1.4963	1.33275	2.04605	3.67416	2.0759	1.79168	2.69864	0.917559	1.33972	1.6949	6.04666		-0.539937	-0.65217	-0.162684	0.954569	-0.1422	-0.337239	0.285141	-0.937085	-0.647387	-0.403652	2.58264
Spi1	1.11992	0.345433	0.890074	2.22924	0.62969	0.797818	1.02306	1.17629	0.908468	0.411626	0.720645		0.371555	-1.15995	-0.082954	2.56518	-0.59785	-0.265386	0.180019	0.483024	-0.0465808	-1.02906	-0.417991
Uhrf1	2.98924	3.07355	2.9142	3.83327	5.23526	4.88857	2.81126	3.28209	3.58446	3.1132	12.2328		-0.501651	-0.470792	-0.529117	-0.192722	0.32043	0.193535	-0.566795	-0.394463	-0.283791	-0.45628	2.88165
2810408A11Rik	0.756918	0.606406	0.683603	1.34284	0.902757	0.937143	1.04766	0.993771	0.729445	0.702535	0.932171		-0.564603	-1.27863	-0.91241	2.21502	0.127259	0.290387	0.814681	0.559031	-0.694935	-0.822596	0.2668
Sell	28.5013	41.2584	35.5219	56.8019	56.7951	50.1566	152.982	100.686	122.69	151.392	151.565		-1.14357	-0.890789	-1.00446	-0.582794	-0.582929	-0.714471	1.32302	0.28677	0.722779	1.29151	1.29494
Kcnk7	3.04672	1.95271	1.46753	2.70258	3.06273	4.29446	3.74259	3.10311	3.0638	2.31881	3.98665		0.0826598	-1.20548	-1.77675	-0.322546	0.101511	1.5518	0.902008	0.149056	0.102771	-0.774414	1.18937
Gpsm2	2.46412	2.44299	2.75399	4.41803	3.73791	3.79155	3.70772	3.05995	3.6485	3.09756	4.52471		-1.33724	-1.36672	-0.932762	1.3892	0.440175	0.515023	0.398048	-0.505833	0.315414	-0.453353	1.53806
Cd63	0.436609	1.04211	0.562272	1.42011	0.545533	1.21978	0.346232	0.764331	0.335388	0.297173	0.369667		-0.587647	0.955432	-0.267403	1.91874	-0.310061	1.40821	-0.817967	0.247531	-0.845602	-0.942991	-0.758244
Tbc1d2	0.813954	0.828712	1.10267	1.15522	1.4215	1.71836	0.621979	0.680053	0.488836	0.428102	0.490765		-0.173461	-0.138114	0.518043	0.643905	1.28167	1.99268	-0.633261	-0.494168	-0.952151	-1.09762	-0.947531
Icosl	4.6918	4.20481	4.01591	6.84765	6.44601	6.97717	6.98068	5.98594	6.06589	6.61694	9.32518		-0.997979	-1.32104	-1.44635	0.432174	0.165733	0.518095	0.520423	-0.139469	-0.086432	0.279125	2.07572
Gpc1	11.3902	10.1843	15.1242	20.1791	17.8651	19.5924	18.5148	15.0734	13.4377	18.0142	17.6889		-1.41751	-1.78071	-0.292913	1.22952	0.532588	1.05281	0.728264	-0.308213	-0.800851	0.577494	0.47952
Gm5595	1.87446	1.91333	1.8603	2.9197	2.99744	2.95461	2.56917	2.22771	2.29857	2.54583	2.44613		-1.2736	-1.18266	-1.30673	1.17178	1.35365	1.25345	0.3517	-0.447157	-0.281378	0.297095	0.0638438
Parp10	35.1972	34.837	36.7408	55.9527	55.1599	56.7143	34.9473	32.156	33.9793	33.8178	37.9061		-0.551798	-0.588092	-0.396263	1.53955	1.45967	1.61629	-0.576978	-0.858233	-0.674515	-0.690788	-0.278846
Fam212a	0.590146	0.520077	0.390856	0.863754	0.940147	0.556428	0.673883	0.413234	0.5984	0.421764	0.599598		-0.0396303	-0.437975	-1.1726	1.51584	1.95014	-0.231318	0.436417	-1.04538	0.00729389	-0.996887	0.0141046
Psme1	316.146	293.269	295.097	459.144	466.648	496.53	323.25	307.354	313.499	340.543	380.572		-0.617157	-0.919046	-0.894923	1.26987	1.3689	1.76322	-0.523411	-0.733178	-0.652087	-0.29521	0.233021
Gins1	1.71924	2.94944	1.75662	2.62353	3.72779	3.76117	2.92176	2.26269	2.49446	2.06564	6.20306		-0.964943	-0.00295445	-0.935712	-0.257809	0.605697	0.6318	-0.0245996	-0.539977	-0.358738	-0.694066	2.5413
Med12l	1.5665	1.70898	2.10168	2.74739	2.56777	3.15029	1.53378	1.62683	1.37436	1.01309	1.32207		-0.470831	-0.25886	0.325372	1.28601	1.01879	1.88542	-0.51951	-0.381077	-0.756684	-1.29416	-0.834477
Adar	36.3375	37.7972	36.749	56.9499	60.5327	57.0936	35.213	33.603	35.6404	33.2766	35.8462		-0.50463	-0.368052	-0.466128	1.42398	1.75921	1.43743	-0.609845	-0.760486	-0.569855	-0.791025	-0.550599
Plk3	4.6297	5.48637	4.64586	7.57469	7.88819	7.83871	5.45127	6.11936	6.18599	4.55967	6.09759		-1.12417	-0.442949	-1.11132	1.21768	1.46697	1.42763	-0.47086	0.0604032	0.113387	-1.17986	0.0430918
Mitd1	32.9112	29.8406	33.9866	49.927	54.0529	49.2626	30.9888	33.8595	33.1577	35.3644	33.6305		-0.576506	-0.930816	-0.452417	1.38691	1.86299	1.31025	-0.798327	-0.467083	-0.548062	-0.293436	-0.493507
Pilrb1	1.79741	1.22897	1.64198	3.26575	1.85861	2.27261	2.88995	2.76673	2.9138	2.46789	3.83083		-0.83842	-1.5703	-1.03854	1.05211	-0.759623	-0.226585	0.56826	0.409611	0.598968	0.0248447	1.77967
Sult6b1	0.899249	1.05064	1.08286	1.56876	1.76199	1.48449	0.829774	0.572432	0.90429	0.778998	0.876737		-0.468854	-0.0618742	0.0247419	1.33097	1.85043	1.10443	-0.655622	-1.34743	-0.455303	-0.792122	-0.529373
Napsa	1.11068	0.524362	0.656794	1.12246	0.854963	1.66226	1.09465	0.833279	0.621613	0.647984	0.738881		0.64803	-1.1308	-0.729018	0.683769	-0.127792	2.32147	0.599396	-0.193579	-0.835754	-0.755747	-0.479974
Tnfsf13b	0.710906	0.447499	0.261575	0.693667	0.571021	0.993018	0.644268	1.00744	1.15461	0.864062	1.08917		-0.199412	-1.13546	-1.79616	-0.260673	-0.696509	0.803104	-0.436218	0.854354	1.37734	0.344844	1.14479
Phf11b	26.3689	23.2381	33.2985	43.9975	44.7752	43.1499	30.0603	23.5418	25.0848	25.9526	33.1319		-0.678313	-1.05183	0.148414	1.42484	1.51763	1.32372	-0.237915	-1.0156	-0.83151	-0.727979	0.128538
Ly6e	476.314	464.292	427.701	695.859	727.151	755.891	491.427	452.736	453.734	519.116	521.837		-0.561118	-0.660506	-0.963009	1.2539	1.51259	1.75019	-0.436176	-0.756041	-0.74779	-0.207267	-0.184772
Etv3	14.0016	13.9712	14.0601	22.9155	22.0194	22.0692	14.599	13.3494	14.1483	14.102	15.9535		-0.645717	-0.653664	-0.630425	1.68445	1.4502	1.46322	-0.489552	-0.816208	-0.607368	-0.619472	-0.135474
Gm12216	13.9777	13.2819	19.9636	27.5377	23.0473	24.7596	19.8497	15.7365	12.8355	14.652	14.1383		-0.812055	-0.947096	0.349695	1.81969	0.948183	1.28051	0.32759	-0.470705	-1.03373	-0.681186	-0.780885
Sdhaf1	14.8478	13.9465	12.8044	23.7367	19.4423	23.263	18.7964	15.1427	13.9923	14.6854	14.3673		-0.509692	-0.74257	-1.03767	1.78703	0.67744	1.66464	0.510551	-0.433495	-0.730737	-0.551653	-0.633844
Dusp2	52.9365	53.9799	46.1545	82.6097	76.2204	86.0719	57.0102	47.743	50.8084	54.0465	47.243		-0.447427	-0.376617	-0.907682	1.56633	1.13272	1.80129	-0.170968	-0.79988	-0.591849	-0.372097	-0.833812
Slfn1	121.284	114.697	110.372	167.693	198.726	187.802	119.284	113.469	121.362	120.391	122.455		-0.461142	-0.665614	-0.79987	0.979475	1.94279	1.60369	-0.523226	-0.703733	-0.458721	-0.488862	-0.424792
Otos	1.0115	0.779977	0.893226	1.77655	1.04267	1.48354	1.05877	1.50509	0.932406	1.44579	0.856417		-0.456699	-1.1576	-0.814755	1.85937	-0.362337	0.97233	-0.313596	1.03757	-0.696144	0.858048	-0.926189
Pik3ip1	42.4154	45.7131	49.6672	62.4433	67.7103	90.8718	48.6698	40.1431	40.2191	52.0923	42.4857		-0.683488	-0.469497	-0.212912	0.61614	0.957921	2.46089	-0.277635	-0.83094	-0.826008	-0.0555454	-0.678926
Gzmk	83.6039	90.6755	67.7897	114.979	133.316	140.209	65.3141	63.2391	67.0764	65.2471	66.6348		-0.120059	0.122883	-0.663348	0.957818	1.58778	1.82458	-0.748396	-0.819682	-0.687853	-0.750698	-0.703024
Aim2	17.5813	17.3852	16.4396	27.0545	27.0799	28.5705	16.5855	14.9521	15.7469	15.2054	18.575		-0.376342	-0.413612	-0.593331	1.42411	1.42894	1.71224	-0.565601	-0.876041	-0.724984	-0.8279	-0.187481
H2-Bl	0.790244	0.522312	0.581535	0.771081	1.2836	0.993457	0.651714	0.830021	0.485634	0.645451	0.71369		0.168291	-1.00167	-0.743061	0.084614	2.32259	1.05565	-0.436616	0.341982	-1.16182	-0.463964	-0.165991
Cenph	0.684116	0.861269	0.431516	0.715207	1.099	1.3822	0.790485	0.898188	0.855843	0.74835	2.56515		-0.557622	-0.247692	-0.999546	-0.503228	0.168219	0.663678	-0.371529	-0.183102	-0.257185	-0.445244	2.73325
Ms4a4c	28.7007	31.7263	30.5416	43.794	57.0984	46.5316	77.5605	66.1834	73.1389	75.1259	82.8241		-1.3246	-1.17643	-1.23444	-0.585423	0.066146	-0.451352	1.06826	0.511074	0.851712	0.949023	1.32603
Nfkbiz	14.4009	17.309	17.2099	28.1667	25.7806	25.5833	17.5598	17.0627	17.3477	16.45	18.7863		-1.13126	-0.499124	-0.520665	1.86104	1.34237	1.29948	-0.444607	-0.552663	-0.490712	-0.685846	-0.178
Cdkl3	1.73729	2.09758	2.07303	2.69105	3.86249	3.0587	2.07098	2.25332	2.07849	1.59737	2.00984		-0.894638	-0.342357	-0.379989	0.567363	2.36304	1.13093	-0.383131	-0.103626	-0.371619	-1.10912	-0.476852
Zfp1	6.97902	7.65262	6.57863	10.5052	12.0893	11.976	8.67185	7.62154	7.7635	8.58522	8.83739		-0.983312	-0.627745	-1.19466	0.878022	1.71421	1.6544	-0.0897326	-0.644151	-0.569216	-0.135461	-0.00235042
Fkbp5	31.5689	32.8833	35.4386	36.154	52.6497	74.2221	19.2639	21.4605	22.0311	18.2692	20.0262		-0.0887333	-0.0119546	0.137309	0.179098	1.14267	2.40279	-0.807511	-0.6792	-0.645869	-0.865615	-0.762983
F2rl2	10.6299	12.0549	11.9066	18.6699	18.1401	19.67	10.5198	10.3031	10.6651	9.50477	12.1076		-0.656009	-0.278555	-0.317837	1.47363	1.3333	1.73854	-0.685173	-0.742572	-0.646686	-0.954034	-0.264596
Piga	6.447	6.60872	8.33547	12.0862	11.3558	11.4913	8.67678	6.33523	6.78203	6.64312	8.89541		-0.933386	-0.860368	-0.0807327	1.61274	1.28296	1.34414	0.0733703	-0.98385	-0.782118	-0.844837	0.172083
Art2b	35.2357	36.9747	55.324	88.6947	72.8705	46.7787	39.5994	13.6924	17.7802	28.3764	37.7417		-0.34782	-0.26998	0.551362	2.04508	1.33677	0.168862	-0.152494	-1.31213	-1.12915	-0.654853	-0.235648
Hic1	3.50449	2.59116	4.0648	7.72958	5.29061	3.57828	2.78099	2.01256	2.62634	2.40526	3.82864		-0.103641	-0.66245	0.239178	2.48142	0.989173	-0.0584933	-0.546305	-1.01646	-0.640925	-0.77619	0.0946862
Socs3	34.5001	30.6205	30.3065	60.9429	47.9968	47.0345	38.1196	21.1855	26.2892	29.773	31.2157		-0.145645	-0.481922	-0.509139	2.14637	1.02423	0.940815	0.168087	-1.29973	-0.857351	-0.555381	-0.430331
Cdkn1a	0.622564	1.11035	0.612431	1.47029	1.02791	1.33549	0.874519	1.24552	0.901816	0.817223	1.40563		-1.38144	0.238549	-1.4151	1.43395	-0.035244	0.986264	-0.544673	0.687464	-0.454016	-0.734959	1.21921
Ifi35	50.2695	48.0504	54.6201	84.5257	86.1385	80.0726	52.9976	51.7735	53.719	51.2342	54.0084		-0.698597	-0.847601	-0.40647	1.60158	1.70988	1.30257	-0.515415	-0.597609	-0.466975	-0.633821	-0.447543
Ctss	58.8922	59.3254	54.2717	95.4342	92.9345	94.78	74.7036	68.0894	73.1055	69.2693	73.6671		-1.03539	-1.00578	-1.35114	1.46185	1.29102	1.41714	0.0451452	-0.406861	-0.0640669	-0.326228	-0.0256879
Nampt	7.32498	7.06847	7.00581	11.738	11.8078	11.6877	7.28056	7.32877	8.06185	7.63314	7.80909		-0.633256	-0.759341	-0.790141	1.53592	1.57023	1.5112	-0.65509	-0.631393	-0.271054	-0.481783	-0.395296
Fos	2.43643	1.62216	0.384203	3.78808	2.13264	1.40245	5.29931	0.538997	1.11062	2.43284	1.9722		0.234274	-0.335815	-1.20254	1.1806	0.0215835	-0.489639	2.23864	-1.09416	-0.693956	0.23176	-0.0907442
Nlrc5	71.7491	75.9713	76.2179	122.258	122.4	126.225	78.0629	69.2886	72.9925	70.8941	92.263		-0.743791	-0.561094	-0.550423	1.44176	1.4479	1.61341	-0.470589	-0.850258	-0.689988	-0.780787	0.143857
Trim21	26.8495	25.668	27.0095	45.1373	42.3897	44.2042	27.8938	24.7175	27.0614	24.7658	27.1413		-0.522205	-0.665105	-0.502853	1.68967	1.35735	1.57681	-0.395899	-0.780066	-0.496576	-0.774224	-0.486912
Cpt1a	23.529	20.1669	23.4921	32.9199	33.409	45.2383	26.9239	22.8418	17.7632	23.0266	16.9218		-0.300185	-0.705159	-0.304629	0.830975	0.889889	2.31476	0.10874	-0.38296	-0.994691	-0.3607	-1.09604
Gzma	175.138	128.123	157.873	163.423	241.894	360.669	114.246	378.901	221.275	57.0752	167.346		-0.220262	-0.695994	-0.394962	-0.338803	0.455224	1.65708	-0.836412	1.84156	0.246586	-1.41491	-0.299107
Cdkl4	0.482207	0.4699	0.511806	0.850544	1.07755	0.505173	0.670636	0.795431	0.632558	0.776347	0.565304		-0.966802	-1.03118	-0.811981	0.959836	2.14722	-0.846676	0.0188018	0.671559	-0.180371	0.571738	-0.532152
Stat2	16.4644	17.6848	17.7077	26.7713	29.3532	30.185	16.7239	17.3586	19.2049	14.7023	18.3245		-0.71096	-0.490906	-0.486777	1.14751	1.61305	1.76304	-0.664169	-0.549724	-0.216813	-1.02869	-0.37556
Upk1a	0.793894	0.823097	0.206195	1.13918	0.875247	1.0274	0.399944	0.531378	0.430479	0.238394	0.434936		0.522985	0.614653	-1.32181	1.60684	0.778352	1.25596	-0.713628	-0.301056	-0.617778	-1.22073	-0.603788
Ms4a4d	0.80279	1.19386	1.63938	1.99747	1.84313	2.22871	1.52783	1.2648	0.962021	1.06551	1.1555		-1.36303	-0.507093	0.468022	1.25178	0.913972	1.7579	0.223871	-0.351826	-1.01452	-0.788014	-0.591052
Pla2g7	1.71444	0.586117	0.848345	2.85541	1.1634	1.23868	1.26576	0.802051	0.463214	0.150895	0.325354		0.889535	-0.593374	-0.248738	2.38907	0.165326	0.264263	0.299853	-0.30958	-0.7549	-1.16537	-0.936084
Mov10	22.4093	21.9659	22.9804	37.7561	39.9825	35.0367	23.4488	21.4402	21.3516	22.4875	24.5587		-0.596066	-0.658034	-0.516251	1.54875	1.8599	1.16869	-0.450789	-0.731504	-0.743886	-0.585137	-0.295674
Ifit2	14.4908	14.4603	14.8179	23.1792	25.6022	24.5471	16.6549	17.1163	16.6069	15.5254	16.9		-0.882727	-0.890039	-0.804308	1.20023	1.78112	1.52817	-0.363906	-0.25329	-0.375413	-0.634692	-0.305145
Spp1	0.497865	0.594155	0.688463	0.973811	1.05216	0.958412	0.474729	0.254542	0.268135	0.297005	0.624667		-0.381493	-0.0468368	0.280931	1.27266	1.54496	1.21914	-0.461902	-1.22716	-1.17992	-1.07958	0.0592077
Helz2	32.3167	32.9897	33.9872	53.9036	61.3912	51.2304	30.8927	27.3029	28.4059	28.0574	33.5961		-0.446593	-0.390165	-0.306529	1.36337	1.99118	1.13924	-0.565989	-0.866978	-0.774496	-0.803716	-0.339321
Phlda3	0.840928	1.49981	0.618832	2.10995	1.7637	1.09073	1.60041	1.15664	1.40269	2.5348	3.28875		-1.012	-0.164749	-1.29759	0.619822	0.174584	-0.690779	-0.0353888	-0.606026	-0.289634	1.16613	2.13562
Khdc3	1.36507	2.14283	2.14722	2.63064	3.00615	3.86123	1.52629	1.70262	1.54145	0.940743	1.27136		-0.747697	0.150754	0.155825	0.714261	1.14804	2.13581	-0.56146	-0.357767	-0.543947	-1.23787	-0.855949
Pon3	0.22407	0.775759	0.600677	0.905781	0.809911	0.972503	0.88334	1.23278	0.914718	0.620943	0.921478		-2.25194	-0.115677	-0.793633	0.387796	0.0165664	0.646158	0.300899	1.65401	0.422402	-0.715158	0.448578
Col9a3	1.30173	0.716983	0.929759	1.64374	1.68627	1.62444	1.42086	1.0556	1.12936	1.09449	1.10215		0.176208	-1.6708	-0.998713	1.25649	1.39083	1.19553	0.552497	-0.601227	-0.368246	-0.478388	-0.454193
Gm6548	11.3493	11.7132	11.129	18.4926	20.2641	18.8736	12.6608	12.5378	10.7158	12.5154	13.3176		-0.750631	-0.646035	-0.813951	1.30256	1.81174	1.41207	-0.373668	-0.409022	-0.932717	-0.41546	-0.184885
Apobec3	123.737	127.902	138.061	216.45	217.885	222.527	123.753	106.261	107.922	117.794	114.398		-0.493341	-0.404906	-0.189202	1.47522	1.50569	1.60425	-0.493001	-0.864406	-0.829138	-0.619527	-0.691634
Ddah2	0.617858	0.875081	0.438437	1.0134	1.07531	1.18267	1.04992	1.043	1.09844	0.922055	0.917584		-1.41204	-0.249709	-2.2228	0.375323	0.65508	1.14021	0.540348	0.509078	0.759599	-0.0374442	-0.0576476
Teddm3	0.747885	0.308947	0.257982	0.63853	0.613239	0.97938	0.978545	1.10465	1.03411	1.09763	1.30601		-0.225386	-1.52064	-1.67103	-0.548079	-0.62271	0.457727	0.455263	0.827383	0.619229	0.806668	1.42157
Syne4	0.396509	0.741231	0.247844	1.1502	0.743027	0.460736	0.669594	0.24602	0.516535	0.458476	0.617955		-0.660531	0.667144	-1.2331	2.24226	0.674061	-0.413165	0.391238	-1.24013	-0.198259	-0.421869	0.192354
Pilrb2	1.26203	0.799384	0.975155	1.97028	1.50788	1.68573	1.68129	1.38079	1.10518	1.32071	1.62952		-0.376199	-1.70978	-1.20312	1.66534	0.332466	0.845121	0.832322	-0.0338719	-0.82832	-0.207053	0.683095
Ccnyl1	3.84757	3.70606	4.14451	6.31153	7.12405	6.48436	4.77556	4.19742	4.3006	4.83914	5.24059		-0.991947	-1.11403	-0.735779	1.13369	1.83464	1.28279	-0.191378	-0.690134	-0.601122	-0.136529	0.209799
Utf1	0.581937	0.815885	1.28473	1.85834	1.4377	1.27473	0.604099	0.416747	0.390133	0.540126	0.358338		-0.563882	-0.104882	0.814981	1.94039	1.1151	0.795361	-0.520401	-0.887981	-0.940197	-0.645915	-1.00258
Cd86	4.80851	3.79378	3.25164	6.42496	6.90119	6.89823	3.91611	3.84858	3.95332	3.295	3.46608		0.147054	-0.555547	-0.930925	1.26629	1.59603	1.59398	-0.470845	-0.517603	-0.445081	-0.900903	-0.782447
Slfn8	36.9496	40.518	39.9807	64.5468	74.1916	61.8372	41.1087	41.9157	44.2387	39.9969	40.6181		-0.855739	-0.57455	-0.616889	1.31891	2.07892	1.1054	-0.528003	-0.464412	-0.28136	-0.615613	-0.566662
Gbp7	39.8779	43.5257	44.2902	69.8887	73.5919	74.9345	45.5158	40.8826	41.8854	39.2416	48.3521		-0.78782	-0.5315	-0.47778	1.32096	1.58117	1.67551	-0.391661	-0.717223	-0.646759	-0.832532	-0.192362
Nfkbia	62.3462	65.6407	64.0291	120.305	104.889	103.272	74.3777	69.4444	66.4901	72.0279	67.8916		-0.831554	-0.668578	-0.748302	2.03561	1.273	1.193	-0.236367	-0.480413	-0.626559	-0.35261	-0.557228
Nfkb2	26.2517	24.4524	25.0352	47.0245	45.469	37.1317	29.0418	26.0041	28.8798	27.8879	28.8426		-0.645534	-0.868698	-0.796414	1.93088	1.73796	0.703894	-0.299482	-0.676243	-0.319575	-0.442598	-0.324189
Fam109b	0.736448	0.767407	0.747007	1.1847	1.04452	1.62645	1.13641	1.1324	1.32103	1.11767	1.0617		-1.29406	-1.17731	-1.25424	0.396278	-0.132334	2.0621	0.214179	0.199058	0.910372	0.143511	-0.0675487
Serpinb6b	33.3098	32.1153	36.3301	55.5219	54.5541	64.5421	22.1587	26.9888	26.2825	25.2722	30.6349		-0.261541	-0.344744	-0.0511606	1.28565	1.21824	1.91396	-1.03827	-0.701832	-0.751029	-0.821402	-0.447861
Gm14005	4.33493	5.51537	4.4055	8.11727	7.45988	8.90274	4.47055	5.62043	5.01369	2.31798	4.52989		-0.612938	-0.000903099	-0.576349	1.34813	1.00729	1.75538	-0.542622	0.0535685	-0.261014	-1.65869	-0.511855
Pml	21.2691	20.4947	21.6354	34.7038	39.7147	34.4768	21.0941	19.6902	20.0807	19.0035	20.7327		-0.469884	-0.572686	-0.421258	1.31358	1.97878	1.28345	-0.493116	-0.679484	-0.627645	-0.770644	-0.541092
Gbp3	24.1427	24.6971	23.2051	39.7596	40.8332	43.3012	28.7753	25.6187	25.0798	25.0646	32.6519		-0.810988	-0.737782	-0.934792	1.25114	1.3929	1.71879	-0.199278	-0.61609	-0.687249	-0.689256	0.312606
Gm13293	1.00792	0.674114	0.794698	1.1591	1.51798	1.58388	0.856348	0.945224	0.530916	0.845292	0.975295		0.055085	-0.975023	-0.602907	0.521618	1.6291	1.83247	-0.412658	-0.138392	-1.41692	-0.446776	-0.045594
Ciart	1.99585	1.87115	1.45311	3.93635	2.82537	2.40232	1.73757	2.67614	1.91808	2.51461	1.86962		-0.426267	-0.60641	-1.21031	2.37699	0.772064	0.160923	-0.79938	0.556485	-0.538614	0.323138	-0.60862
Bbc3	29.9403	24.6813	30.7808	39.8806	39.4779	68.1445	29.4139	25.3567	24.9418	30.5972	23.7549		-0.267598	-0.679015	-0.201844	0.510044	0.47854	2.72116	-0.308778	-0.626178	-0.658636	-0.216207	-0.751489
9330175E14Rik	3.29842	3.63349	3.64093	6.62185	5.82664	5.83863	4.65394	4.51307	3.42493	3.09663	2.95321		-0.802181	-0.538644	-0.532792	1.81174	1.1863	1.19573	0.263954	0.153158	-0.702679	-0.960892	-1.07369
Nf1	1.0686	1.27286	1.35219	2.04724	2.09641	2.2754	1.207	1.10262	1.12519	1.02892	1.1328		-0.766462	-0.330989	-0.161862	1.31995	1.42478	1.80638	-0.4714	-0.693933	-0.645815	-0.851057	-0.62959
Susd2	1.69209	1.35136	1.39063	2.67827	2.76587	2.26724	1.61008	1.91634	1.5761	1.13272	2.59432		-0.370803	-0.959186	-0.891374	1.33216	1.48344	0.622385	-0.51242	0.0164394	-0.571098	-1.33674	1.1872
Parp14	33.739	35.8856	39.3497	62.0601	66.4083	61.3459	31.0672	30.5236	32.8076	29.8228	35.378		-0.559277	-0.407934	-0.163703	1.43746	1.74402	1.3871	-0.747648	-0.785974	-0.624944	-0.835383	-0.443722
Mlkl	2.36336	2.23152	2.64603	3.8544	3.98648	4.81035	3.24486	3.45751	3.01886	3.65384	3.77333		-1.30565	-1.4771	-0.938035	0.633442	0.805211	1.87665	-0.159261	0.117289	-0.453172	0.372615	0.528011
Asb2	3.53992	1.72565	3.63801	7.92055	4.38489	3.26093	6.737	2.92034	3.95699	3.15718	7.61352		-0.440571	-1.32728	-0.392631	1.70042	-0.0276001	-0.576925	1.12197	-0.743385	-0.236732	-0.627632	1.55036
Rab27a	42.7091	42.2564	51.2818	54.6812	78.1528	105.779	31.92	35.5309	37.2593	31.6356	36.2036		-0.307453	-0.32718	0.0661183	0.214253	1.23707	2.44093	-0.777607	-0.620256	-0.544937	-0.79	-0.590941
Setbp1	0.316393	0.34282	0.274817	0.55671	0.486054	0.597718	0.439269	0.231534	0.353808	0.3548	0.483069		-0.740708	-0.515634	-1.0948	1.30603	0.704266	1.65529	0.305806	-1.46344	-0.422051	-0.413602	0.678843
Hook2	3.14397	3.20938	3.28535	6.23773	5.62102	5.07232	3.51106	2.99035	3.30528	2.82471	3.07012		-0.583023	-0.528456	-0.46508	1.99789	1.48341	1.02567	-0.276785	-0.711178	-0.448453	-0.84936	-0.644631
Hsh2d	19.5665	17.8436	18.3175	32.5773	35.7432	29.6318	17.8648	15.652	17.5799	18.0044	17.1118		-0.313275	-0.554023	-0.487803	1.50478	1.94716	1.09319	-0.551061	-0.860264	-0.590871	-0.531554	-0.65628
Vars	69.322	67.8268	65.8964	113.062	119.537	124.58	66.1807	63.2749	66.4412	72.0729	72.1686		-0.518203	-0.580044	-0.659885	1.29088	1.55868	1.76726	-0.648126	-0.76831	-0.637352	-0.404426	-0.400468
Nrarp	11.7321	11.796	11.4669	18.0664	21.0689	22.4364	12.0368	12.7521	11.4833	13.0235	9.4457		-0.551388	-0.536626	-0.612653	0.911923	1.60554	1.92145	-0.480998	-0.315754	-0.608864	-0.253057	-1.07958
Frmd4b	2.23269	1.81287	2.11741	4.16277	3.08436	3.61286	2.74299	2.58728	2.10642	1.81932	2.21875		-0.473857	-1.02952	-0.626439	2.08076	0.653396	1.35291	0.201565	-0.00452905	-0.640985	-1.02098	-0.492308
Amica1	37.7413	41.5999	33.2886	59.9026	74.8352	64.5933	49.707	46.5267	46.9693	51.6097	58.6091		-1.11345	-0.798862	-1.47647	0.693335	1.91077	1.07576	-0.1379	-0.397186	-0.361101	0.0172248	0.587877
Relb	21.1707	20.6336	17.085	40.0252	35.206	29.0297	25.2124	23.0461	24.1441	21.7703	24.4449		-0.659848	-0.739586	-1.26642	2.13932	1.42385	0.506911	-0.0598111	-0.381423	-0.218412	-0.57083	-0.173755
Ifit1bl1	66.3183	67.4164	66.1589	106.799	126.964	120.27	81.4427	69.225	78.3085	74.3705	86.9484		-0.881048	-0.831484	-0.888242	0.946071	1.85623	1.55409	-0.198399	-0.749852	-0.339863	-0.517607	0.0501033
1700012D14Rik	1.071	0.524352	1.18221	1.97393	1.33818	1.62067	2.03827	1.87484	0.987248	1.70092	1.61207		-0.799637	-1.96031	-0.563509	1.11752	-0.232344	0.367455	1.25413	0.907124	-0.977464	0.537847	0.349195
Ddx58	33.4578	33.0239	34.8586	60.8359	64.0668	55.4	34.803	31.6295	31.0186	31.7077	35.1593		-0.554003	-0.587936	-0.444456	1.58706	1.83973	1.16195	-0.448804	-0.696983	-0.744757	-0.690867	-0.42094
Cacnb3	0.513442	0.234093	0.259771	0.459309	0.541311	0.794423	0.183224	0.299612	0.35509	0.196584	0.270056		0.750234	-0.745826	-0.608307	0.460324	0.899487	2.25503	-1.01826	-0.394937	-0.0978235	-0.946706	-0.553225
Asns	2.40698	1.87544	2.2681	3.75205	3.71347	4.21294	2.37422	2.98032	2.62464	2.6972	2.38588		-0.593733	-1.31479	-0.782131	1.23092	1.17859	1.85614	-0.638173	0.184032	-0.298466	-0.200035	-0.622356
B430306N03Rik	0.63647	0.342013	0.239899	0.954276	0.741911	0.48789	0.782914	0.421214	0.586701	0.602268	0.854333		0.144882	-1.19102	-1.65429	1.58671	0.62325	-0.5292	0.809274	-0.831698	-0.0809115	-0.0102866	1.13329
Tmem176a	1.8819	2.46177	1.93542	3.15605	3.08622	5.03589	4.74538	3.50311	4.5456	5.70406	8.06656		-1.15007	-0.83686	-1.12117	-0.461846	-0.499565	0.553544	0.396626	-0.274383	0.288716	0.914455	2.19055
Gm10684	7.995	8.05466	5.47385	12.4423	13.3246	12.9127	10.5932	9.2788	9.84603	10.3884	11.6105		-0.912136	-0.887168	-1.96723	0.949048	1.31829	1.14591	0.175204	-0.374869	-0.137484	0.089496	0.600942
Oas1b	16.1965	17.3975	17.5701	31.4563	32.3911	28.1499	16.8884	17.981	15.6736	15.8391	18.6521		-0.698662	-0.514187	-0.487675	1.64526	1.78884	1.13739	-0.592385	-0.424561	-0.778979	-0.753558	-0.321479
Tsc22d3	85.1245	77.5161	74.0529	126.505	130.112	169.493	115.882	111.904	95.5382	144.61	124.279		-0.985087	-1.24382	-1.36159	0.422104	0.544764	1.88396	0.0608565	-0.07442	-0.630958	1.03778	0.346406
H2-T9	11.6689	8.11894	11.284	14.7676	13.5455	27.7207	15.3365	8.86744	17.2971	11.4935	10.2924		-0.369251	-1.02363	-0.440201	0.201947	-0.0233281	2.58965	0.306815	-0.885657	0.668222	-0.401583	-0.622987
Mfsd2a	0.441825	0.400818	0.487704	0.887582	0.803716	0.707915	0.42043	0.318475	0.335404	0.291881	0.572129		-0.362064	-0.56424	-0.135867	1.83564	1.42216	0.949835	-0.467547	-0.970214	-0.886749	-1.10133	0.280372
Parp12	9.56348	8.96947	8.06505	14.9109	18.4566	14.6781	13.2369	9.77559	11.6361	12.8707	13.2783		-0.887981	-1.07983	-1.37194	0.839117	1.9843	0.763928	0.298452	-0.819474	-0.218571	0.180178	0.311824
Fgl2	6.18547	6.01678	5.68458	10.4513	9.82466	12.2913	9.46341	10.4307	10.4359	8.84992	17.369		-1.068	-1.11886	-1.21902	0.218224	0.0292812	0.773015	-0.0796419	0.212013	0.213581	-0.26462	2.30403
2610318N02Rik	1.57156	1.73121	1.47191	2.60222	3.12394	2.99347	1.58609	1.66734	1.62427	1.84762	2.09672		-0.762612	-0.496314	-0.928828	0.956537	1.82677	1.60915	-0.738375	-0.60285	-0.674691	-0.302141	0.113359
Lag3	7.95608	4.58345	4.96522	9.95769	10.7225	11.398	1.84589	2.4361	2.09912	1.20552	1.64241		0.659721	-0.192919	-0.0964031	1.16575	1.3591	1.52988	-0.885006	-0.735794	-0.820987	-1.0469	-0.936448
Dtx3l	30.9839	32.497	35.5585	58.5415	62.5318	60.5436	33.2548	28.9696	33.4509	30.8969	35.259		-0.699515	-0.584994	-0.353278	1.38623	1.68824	1.53776	-0.527638	-0.851971	-0.512796	-0.7061	-0.375947
Ppa1	20.221	20.8925	18.8315	35.4244	38.4646	36.0372	19.8611	17.9838	20.9966	24.8214	29.2036		-0.711664	-0.624498	-0.892032	1.26186	1.6565	1.34141	-0.758382	-1.00207	-0.610985	-0.114494	0.454351
Casp4	10.5723	9.62283	11.3547	18.6006	20.1973	19.1155	15.2654	11.2188	12.3043	12.7528	15.9328		-0.986172	-1.2396	-0.777339	1.15669	1.58287	1.29412	0.266478	-0.813613	-0.523879	-0.404168	0.444616
1810010H24Rik	0.282545	0.435746	0.436638	0.551387	0.741366	0.828805	0.537727	0.544073	0.260451	0.461551	0.239225		-1.07203	-0.255126	-0.250369	0.361496	1.3745	1.84075	0.288658	0.322496	-1.18984	-0.117528	-1.30302
Etv5	0.57314	0.369578	0.432057	1.13212	0.772887	0.629727	0.638501	0.538364	0.670069	0.499525	0.544445		-0.221108	-1.21955	-0.913102	2.52061	0.758624	0.0564434	0.0994787	-0.39168	0.254316	-0.58218	-0.361853
Irf8	6.68347	5.73804	6.82786	12.8559	10.4983	12.1578	6.34161	5.04533	5.29586	5.10304	7.71797		-0.342589	-0.674107	-0.291958	1.82179	0.995094	1.577	-0.462463	-0.917008	-0.829159	-0.896772	0.0201622
Ifi47	148.809	145.735	158.415	269.172	270.427	297.429	150.887	143.066	160.665	147.928	180.369		-0.666555	-0.718249	-0.505014	1.35755	1.37865	1.83273	-0.63161	-0.763133	-0.467177	-0.68137	-0.135822
Ctnnd1	0.410432	0.230126	0.514917	1.06942	0.47956	0.590907	0.328002	0.374767	0.259968	0.121729	0.177823		-0.0149222	-0.704825	0.384868	2.50656	0.249581	0.675627	-0.330323	-0.151387	-0.590641	-1.11958	-0.904951
Atp8a2	1.17686	1.2324	0.817932	2.46678	1.91976	1.59822	0.705107	0.775743	0.857157	1.03837	1.04563		-0.114194	-0.0128639	-0.769044	2.23921	1.2412	0.65456	-0.974889	-0.846017	-0.69748	-0.366864	-0.353618
Cpsf4l	0.713745	0.306959	0.21976	0.825503	0.808927	0.67424	1.03465	1.07239	0.563029	0.355729	0.463345		0.258434	-1.1641	-1.46903	0.649252	0.591286	0.120285	1.38064	1.51262	-0.26862	-0.993548	-0.617215
2010204K13Rik	0.58637	1.29518	0.485443	1.28484	1.7831	1.37868	0.976458	2.30343	1.34047	1.49509	0.866921		-1.27852	0.0784937	-1.47174	0.0586979	1.01261	0.238354	-0.531696	2.00878	0.165201	0.461219	-0.741404
Tdrd7	1.24536	1.4687	1.27764	2.55898	2.88324	2.07212	2.49558	2.24419	1.91779	2.63269	2.59263		-1.51983	-1.1345	-1.46414	0.746564	1.30601	-0.0934173	0.637179	0.203456	-0.359683	0.873736	0.80462
Prss2	0.325243	1.16442	0.538523	0.79339	1.06675	1.95921	0.46424	0.711695	0.674573	0.581109	0.894974		-1.13143	0.734784	-0.657127	-0.0903369	0.517579	2.50229	-0.822323	-0.272016	-0.35457	-0.562421	0.135572
Treml2	5.53342	6.56143	5.93942	11.9333	12.3524	9.72313	8.4963	6.11838	7.03923	9.47571	9.44965		-1.21096	-0.779726	-1.04065	1.47367	1.64948	0.546548	0.0319161	-0.965577	-0.579298	0.44276	0.431829
Slc7a5	12.0441	11.988	9.9542	20.8793	23.6474	19.7432	11.1555	12.8564	14.1456	13.8415	15.0245		-0.672467	-0.685121	-1.14386	1.3204	1.94477	1.06414	-0.872899	-0.489245	-0.198453	-0.267046	-0.000209155
Rgs12	0.361609	0.242418	0.298439	0.537009	0.648379	0.527097	0.493607	0.357681	0.304373	0.69035	0.851986		-0.634705	-1.25793	-0.965008	0.282427	0.864759	0.230599	0.0554866	-0.655243	-0.93398	1.08422	1.92938
Trim30b	0.866906	0.781339	0.848182	1.4803	1.49552	1.77511	1.27489	0.827764	0.671985	1.10635	1.15103		-0.701566	-0.942267	-0.754237	1.02391	1.06673	1.85322	0.446095	-0.811673	-1.24988	-0.0280088	0.0976763
Pydc3	80.6346	88.1251	87.3225	155.018	175.836	156.594	85.9645	82.4441	87.061	86.1846	88.5055		-0.7185	-0.512015	-0.53414	1.33197	1.90584	1.37542	-0.571574	-0.668619	-0.541348	-0.565507	-0.501529
Spred1	1.06246	0.765577	1.01929	1.82448	1.88304	1.7325	0.871304	0.964174	1.14022	0.760232	0.980707		-0.28332	-0.985897	-0.385482	1.52001	1.65859	1.30234	-0.735693	-0.515915	-0.0992997	-0.998546	-0.476789
Mafg	3.1831	3.31165	3.43554	6.69496	5.73377	6.55823	4.24054	3.7148	4.07527	3.35817	4.70139		-0.974458	-0.875988	-0.781086	1.71567	0.979384	1.61093	-0.164447	-0.56717	-0.291046	-0.840353	0.188569
Siglece	1.22981	0.88058	0.984195	2.96997	1.49819	1.44943	0.936206	1.29171	0.566822	0.345289	0.208251		0.142305	-0.32595	-0.187021	2.47555	0.502154	0.436776	-0.251366	0.225301	-0.746644	-1.04368	-1.22742
Arsb	15.3933	15.544	16.4017	24.1859	28.6499	39.1682	15.5253	16.9705	16.0249	14.8975	18.5542		-0.617007	-0.597333	-0.485362	0.53085	1.11362	2.48676	-0.599774	-0.411106	-0.534553	-0.681732	-0.204357
Eif2ak2	11.0796	12.3403	12.7177	21.4902	26.2846	22.6105	13.1234	12.1142	11.1181	11.813	13.4948		-0.777175	-0.544451	-0.474783	1.14461	2.02965	1.35142	-0.399892	-0.586189	-0.770068	-0.64179	-0.331332
Cxcr4	82.178	74.2618	71.9171	150.194	138.299	157.868	106.327	98.3795	89.8832	103.048	79.7386		-0.734904	-0.992803	-1.06919	1.48097	1.09344	1.73097	0.051838	-0.207081	-0.483879	-0.0549874	-0.814376
Vmp1	51.6392	49.7282	51.0034	103.041	91.0263	105.433	57.1004	39.5984	37.1482	45.1644	43.3885		-0.377087	-0.451699	-0.401911	1.62981	1.16072	1.7232	-0.163864	-0.8472	-0.942864	-0.629885	-0.699222
4933412E12Rik	4.71116	3.92104	4.14068	7.92415	8.56448	8.62188	4.21862	4.28147	3.96332	3.75766	5.24893		-0.349159	-0.752133	-0.640113	1.28952	1.6161	1.64537	-0.600363	-0.568308	-0.73057	-0.83546	-0.0748872
Gbp5	16.8587	18.1955	19.2633	38.1028	36.4253	32.4643	20.621	16.7518	17.0961	18.9169	22.0113		-0.792265	-0.62878	-0.498194	1.80579	1.60064	1.11622	-0.332154	-0.805338	-0.763232	-0.540557	-0.162127
Trim34a	17.6037	16.9768	17.9514	33.3982	36.1646	34.0298	19.9719	18.2587	18.935	20.4938	20.2574		-0.736494	-0.820579	-0.689858	1.382	1.75305	1.46671	-0.418851	-0.64864	-0.557929	-0.34885	-0.380558
Phf11c	12.1878	12.1798	12.7284	24.2474	26.8775	22.096	13.438	11.8176	12.8494	14.1571	15.726		-0.733898	-0.735358	-0.635248	1.46677	1.94671	1.07417	-0.505758	-0.801453	-0.613167	-0.374535	-0.0882385
Trafd1	35.5031	33.8686	34.4848	64.5928	73.5074	68.6808	34.9769	31.0915	32.3992	33.2077	36.7156		-0.487869	-0.58699	-0.549622	1.27622	1.81682	1.52413	-0.519779	-0.755401	-0.676099	-0.627069	-0.414339
Gm12253	0.746344	0.918885	0.387691	1.45649	1.43994	1.19583	1.08619	1.03753	0.485635	0.448231	0.892114		-0.457825	0.00312204	-1.41597	1.43935	1.39513	0.742987	0.450081	0.320085	-1.15431	-1.25424	-0.0683973
Prelid2	0.778078	1.17854	0.966231	1.70822	2.00513	2.13973	1.4808	2.29849	1.52413	1.88668	2.30574		-1.67799	-0.916973	-1.32043	0.0896014	0.653833	0.909619	-0.342575	1.21132	-0.260233	0.428737	1.22509
Chst11	8.57369	9.32933	8.09847	17.7993	16.8446	17.4855	11.2553	8.23731	9.18393	8.42314	10.2241		-0.716877	-0.52555	-0.837203	1.61904	1.37731	1.53958	-0.0378963	-0.802048	-0.562365	-0.754997	-0.298995
Ly6k	2.75541	1.56662	1.07925	3.03551	4.16468	3.63158	3.29863	2.64515	3.19542	2.72244	1.88141		0.0332483	-1.27078	-1.8054	0.340502	1.57913	0.994355	0.629129	-0.0877005	0.515913	-0.00291786	-0.925478
Phf11a	12.534	11.0458	15.0006	26.0049	26.5822	24.8336	17.5767	12.9339	13.7836	14.4581	19.1021		-0.889315	-1.14937	-0.45829	1.46465	1.56553	1.25997	-0.00813039	-0.819435	-0.670954	-0.553089	0.258425
Ube2l6	11.0728	11.2086	12.5529	21.7337	24.0779	24.1409	11.1875	10.7395	10.0099	10.6066	11.2574		-0.578447	-0.554958	-0.322439	1.26554	1.671	1.6819	-0.558607	-0.636097	-0.762293	-0.659084	-0.546517
Agrn	1.97371	2.67116	2.32649	4.81461	4.74281	4.46772	2.85744	2.38771	2.57961	2.13743	2.82893		-1.0288	-0.375241	-0.698221	1.63332	1.56604	1.30826	-0.200684	-0.640853	-0.46103	-0.875383	-0.2274
Il12rb1	26.1411	24.9125	29.002	53.3265	46.9864	60.9882	24.6407	20.1596	21.2661	21.1152	29.3557		-0.447155	-0.533065	-0.247105	1.4538	1.01047	1.98955	-0.552071	-0.865415	-0.788042	-0.798594	-0.222372
Psrc1	0.592859	0.543371	0.618075	1.18721	1.38924	0.96461	0.720416	0.489787	0.941345	1.37652	2.3125		-0.7773	-0.868998	-0.730577	0.323989	0.698336	-0.0884727	-0.540946	-0.968285	-0.131581	0.674766	2.40907
Plac8	156.351	172.233	132.645	288.569	341.776	307.672	207.568	157.724	178.048	202.029	307.231		-0.898801	-0.684285	-1.21899	0.887047	1.60571	1.14507	-0.207021	-0.880256	-0.605743	-0.281835	1.13911
Gbp11	0.343153	0.111161	0.378832	0.315082	0.681245	0.698132	0.691775	0.211979	0.37219	0.309098	0.752275		-0.444908	-1.4863	-0.284748	-0.570917	1.07276	1.14856	1.12003	-1.03374	-0.314564	-0.597778	1.39161
Cd274	15.435	14.7802	17.623	31.5298	30.902	34.9324	19.2424	14.5928	15.9115	15.4429	17.0339		-0.676728	-0.761291	-0.39416	1.40183	1.32075	1.84125	-0.185023	-0.785493	-0.61519	-0.675707	-0.470239
Trim30a	49.7677	55.6514	54.8729	99.7788	122.169	104.469	56.805	50.7111	53.9427	55.4594	61.0385		-0.760995	-0.534257	-0.564258	1.16626	2.0291	1.347	-0.489801	-0.724639	-0.600105	-0.541656	-0.326657
4933431E20Rik	0.3305	0.310533	0.332629	0.464758	0.510114	1.00817	0.194247	0.399886	0.439063	0.267959	0.246907		-0.357983	-0.448435	-0.348339	0.250212	0.455677	2.71189	-0.975216	-0.0436614	0.133812	-0.641297	-0.736664
Serpinb9	30.729	28.8079	35.1088	60.014	56.7463	76.0838	22.1719	26.3835	25.3913	23.3197	26.5943		-0.365973	-0.471436	-0.125534	1.24169	1.06231	2.12388	-0.835734	-0.604529	-0.658998	-0.772723	-0.592956
Slfn4	0.66164	0.652061	0.744568	1.3835	1.30249	1.54268	0.641862	0.590397	0.584672	0.576232	0.710971		-0.526692	-0.552956	-0.299316	1.45254	1.23042	1.88899	-0.580921	-0.72203	-0.737727	-0.760868	-0.391434
Klf11	2.85143	3.77521	3.57606	5.62989	6.32268	9.17208	5.64327	4.56977	3.591	5.53542	4.03509		-1.1955	-0.674925	-0.78715	0.370228	0.760631	2.36633	0.377768	-0.227173	-0.778731	0.316992	-0.528477
Fosb	0.707953	1.12301	0.328215	2.69406	1.24724	0.534002	2.9911	0.582477	1.43571	1.15647	1.19882		-0.66206	-0.175433	-1.10728	1.66652	-0.0297816	-0.866006	2.01478	-0.809173	0.191187	-0.136204	-0.0865509
5830411N06Rik	1.71727	2.07338	1.86012	3.51425	3.54991	4.65831	1.18715	1.12107	1.29492	1.04203	2.28364		-0.411244	-0.11359	-0.291843	1.09076	1.12057	2.04702	-0.854344	-0.909577	-0.764265	-0.975643	0.062156
Lgals3bp	86.7054	79.6842	84.2817	163.401	182.678	175.735	84.6387	84.2762	81.7057	83.0021	100.513		-0.549484	-0.717317	-0.607419	1.28382	1.74462	1.57865	-0.598886	-0.607551	-0.668995	-0.638007	-0.219432
Naprt	0.629949	0.429583	0.596025	1.40497	1.0401	1.00564	0.599445	0.4201	0.635994	0.367519	0.711154		-0.262387	-0.897164	-0.369861	2.19295	1.03701	0.927835	-0.359026	-0.927207	-0.243236	-1.09379	-0.00512222
Gdap10	1.15256	1.24813	1.44475	2.57327	2.89239	2.57864	1.44994	1.11141	1.40458	1.23656	1.35627		-0.795466	-0.650544	-0.35239	1.35889	1.84281	1.36704	-0.34452	-0.857865	-0.413304	-0.668088	-0.486561
Tgm2	2.28311	0.849449	1.83589	6.80126	2.19618	1.48896	2.02867	1.64103	0.878069	0.277865	0.422457		0.226051	-0.582079	-0.0260396	2.77285	0.17705	-0.221598	0.0826272	-0.135879	-0.565947	-0.904271	-0.822767
Fam71e1	0.627291	0	0.173107	0.38255	0.734794	0.57502	1.11922	1.23537	0.3614	0.880609	0.796672		0.00338332	-1.64439	-1.18967	-0.639502	0.285772	-0.133922	1.29558	1.60069	-0.695059	0.668799	0.448313
4632427E13Rik	0.32629	0.838683	0.600285	1.16738	1.42691	1.13943	0.517483	0.761585	0.501292	0.999394	0.644614		-1.43495	0.0812864	-0.624163	1.05394	1.82192	0.971235	-0.869185	-0.146856	-0.917096	0.556851	-0.492988
Gbp2	38.6005	36.8042	40.699	82.8266	73.5453	90.5755	44.6847	36.9917	36.0999	42.1625	56.4425		-0.696502	-0.785391	-0.592659	1.492	1.03272	1.87545	-0.395429	-0.776112	-0.820243	-0.520238	0.186399
D730005E14Rik	2.39282	2.89784	2.78893	5.97475	5.59882	5.63636	3.09721	2.53698	2.15118	2.3216	2.61738		-0.712745	-0.374123	-0.447149	1.68898	1.43692	1.46209	-0.240443	-0.616084	-0.874768	-0.760499	-0.562175
Jun	2.08544	2.4467	1.25393	5.12853	3.17767	4.03204	2.95248	1.64726	2.01614	2.12916	4.19174		-0.614061	-0.313591	-1.30565	1.91696	0.294377	1.00498	0.107081	-0.978508	-0.6717	-0.577698	1.13781
Coro2a	10.245	10.8312	14.8763	21.7518	26.6102	28.7411	14.0007	11.8433	12.9729	15.3191	18.8478		-1.05565	-0.962837	-0.322405	0.766145	1.53534	1.87271	-0.461032	-0.802598	-0.623757	-0.252299	0.306375
Fbxo39	0.50341	0.369699	0.592728	1.24438	0.880593	1.01961	0.28742	0.264374	0.587791	0.308379	0.284151		-0.218511	-0.617741	0.0481721	1.99385	0.90767	1.32274	-0.863407	-0.932217	0.0334314	-0.800828	-0.873167
Tmem176b	2.26001	3.14759	3.0976	5.32216	4.45696	8.46739	6.25491	5.19288	4.76385	6.98538	8.84821		-1.43711	-1.02366	-1.04695	-0.0107213	-0.413741	1.45436	0.423764	-0.0709414	-0.270788	0.764025	1.63175
Chek1	0.348473	0.27918	0.297236	0.370934	0.905448	0.713545	0.512471	0.360468	0.423432	0.436639	2.53471		-0.466967	-0.573236	-0.545545	-0.43252	0.387226	0.0929182	-0.215455	-0.448571	-0.352007	-0.331753	2.88591
4933405D12Rik	0.627706	0.592689	0.494918	1.48746	1.17645	1.03337	0.8533	1.09884	0.743943	0.73242	1.06293		-0.912577	-1.02978	-1.35701	1.96497	0.924037	0.445157	-0.157527	0.664281	-0.523539	-0.562105	0.544092
Il18bp	2.95518	2.83683	3.26204	6.67328	5.49905	7.47444	3.29415	2.84527	3.03542	2.02579	4.21781		-0.598032	-0.665078	-0.424196	1.50827	0.84307	1.96213	-0.406006	-0.660296	-0.552576	-1.12453	0.117247
Ccrl2	1.71693	1.47739	1.82592	3.48024	3.57023	3.86005	1.29561	1.60962	1.52607	1.55644	1.11129		-0.371822	-0.608269	-0.26424	1.36871	1.45754	1.74362	-0.787701	-0.477747	-0.560217	-0.53024	-0.969641
Oas1a	18.2302	17.7662	16.7417	34.4626	43.2295	37.1585	16.0899	14.4318	14.8944	13.921	17.8		-0.379542	-0.423376	-0.52016	1.15393	1.98214	1.40861	-0.581736	-0.738376	-0.694674	-0.786631	-0.420183
Rpl39l	0.420759	0.185401	0.46445	0.985334	1.18288	0.176319	0.560538	0.441938	0.232715	0.601414	0.712497		-0.378872	-1.11312	-0.242569	1.38243	1.99872	-1.14145	0.0571963	-0.3128	-0.965513	0.184717	0.531263
Gm19345	0.636971	0.421006	0.421868	1.05659	1.2535	0.934231	0.242451	0.111505	0.352298	0.260131	0.377517		0.229738	-0.351726	-0.349405	1.35952	1.88968	1.03008	-0.832468	-1.18503	-0.536716	-0.784866	-0.468816
Parp9	22.7743	24.1924	25.1558	49.4084	56.6973	52.3068	25.238	22.3713	25.7527	23.1904	27.8087		-0.709206	-0.603218	-0.531213	1.28143	1.8262	1.49805	-0.525069	-0.739326	-0.486601	-0.678107	-0.332935
Ceacam16	1.13098	0.934399	0.702234	2.17262	1.45728	2.48076	1.04258	0.649635	1.00996	0.866018	1.19697		-0.186598	-0.522103	-0.91834	1.59117	0.370299	2.11708	-0.33747	-1.00811	-0.393143	-0.638809	-0.0739725
Herc6	11.4805	12.3284	12.9147	27.5872	30.5943	23.8772	13.1342	11.8717	11.7403	12.4233	15.0109		-0.724697	-0.605439	-0.522976	1.54072	1.96366	1.0189	-0.492103	-0.669674	-0.688156	-0.592092	-0.228145
Lta	3.43177	3.4496	2.79374	7.95282	7.79861	5.88717	5.42905	4.76847	5.49645	5.03661	7.1914		-1.11433	-1.10416	-1.47832	1.46488	1.37691	0.286447	0.0250943	-0.35176	0.0635454	-0.198789	1.0305
1700063D05Rik	2.60386	3.86127	3.86917	7.71988	7.88335	7.65903	4.19316	2.89271	3.23111	4.19218	3.98531		-1.06276	-0.435875	-0.431936	1.48785	1.56935	1.45751	-0.27041	-0.918754	-0.750044	-0.270898	-0.374034
Tnfrsf9	2.45665	1.94164	2.28558	6.40478	5.08846	3.64022	2.24143	1.83562	1.94415	1.99933	2.27444		-0.306451	-0.647585	-0.419765	2.30872	1.43681	0.477525	-0.449009	-0.717811	-0.645922	-0.609372	-0.427144
Pydc4	11.265	13.2157	12.5985	27.3906	30.1074	26.5156	13.4944	11.6831	12.5974	11.9155	14.1352		-0.761406	-0.493584	-0.578323	1.45256	1.82556	1.33243	-0.45532	-0.704003	-0.578474	-0.672095	-0.367341
Ddx60	4.8043	5.32121	5.0814	9.75915	14.0139	10.716	8.02119	6.50644	6.20813	7.07217	7.14437		-1.03146	-0.847032	-0.932592	0.736346	2.25437	1.07773	0.116273	-0.424163	-0.530595	-0.22232	-0.196561
Ifih1	8.11694	7.18045	8.19301	16.7501	20.2421	16.3292	8.72899	7.96247	7.79802	8.46201	9.16864		-0.585738	-0.789272	-0.569205	1.29058	2.04952	1.1991	-0.452716	-0.61931	-0.655051	-0.510741	-0.357163
H2-T24	20.0463	23.3502	21.3094	46.68	55.0384	45.8594	19.1242	18.2175	16.6403	17.3079	17.947		-0.515162	-0.284052	-0.426807	1.34788	1.93255	1.29048	-0.579663	-0.643087	-0.753413	-0.706714	-0.662008
Hspa1b	0.271706	0.256549	0.192805	0.700666	0.581979	0.365973	0.461694	0.679481	2.93395	0.376475	1.72536		-0.608199	-0.626444	-0.703175	-0.0918461	-0.234713	-0.494727	-0.379504	-0.117347	2.59643	-0.482085	1.14161
Spats2	2.42786	2.25379	3.13165	5.74946	5.06159	7.14465	2.3103	1.62364	2.28831	1.33686	2.17111		-0.423346	-0.515537	-0.050606	1.33584	0.971526	2.07475	-0.485608	-0.849276	-0.497255	-1.00116	-0.559326
AW011738	10.1112	13.2871	11.9741	27.1899	31.1676	23.2708	11.1179	11.3588	9.99944	9.57135	8.74635		-0.645085	-0.246721	-0.411415	1.49715	1.99609	1.00557	-0.518811	-0.488594	-0.659104	-0.7128	-0.816283
Tigit	26.9203	25.5444	39.1305	49.6091	55.9491	105.829	13.4424	9.79837	10.6263	12.6539	12.8069		-0.206627	-0.253876	0.212678	0.572519	0.790238	2.50314	-0.669465	-0.794603	-0.766172	-0.696543	-0.691289
Hhat	0.519025	0.592925	0.27585	0.750279	0.594463	1.8729	0.457307	0.403814	0.425279	0.647664	0.455724		-0.271591	-0.0999081	-0.836529	0.265653	-0.0963351	2.8737	-0.414972	-0.539246	-0.489379	0.0272601	-0.41865
Ifit1bl2	0.288001	0.405384	0.300245	0.718154	0.73469	0.871627	0.532884	0.378121	0.309727	0.506401	0.501236		-1.09975	-0.50272	-1.03748	1.08808	1.17219	1.86867	0.145767	-0.641384	-0.989248	0.0110698	-0.0152003
Lilr4b	25.7704	20.6123	28.1249	52.7778	55.8794	66.64	36.644	15.3551	17.6124	23.5415	41.1583		-0.53245	-0.832632	-0.395428	1.03927	1.21978	1.846	0.100351	-1.13858	-1.00721	-0.662164	0.363065
Gm10941	0.299261	0.659321	0.220223	0.681342	0.841313	1.25405	0.284769	0.873121	0.735626	0.916606	0.337837		-1.05975	0.0414442	-1.30148	0.108792	0.598042	1.86034	-1.10407	0.695322	0.274813	0.828315	-0.941771
Socs1	31.6584	34.4872	30.0223	78.1421	74.597	74.7987	36.989	38.8062	41.7677	46.0821	59.2188		-0.970722	-0.818419	-1.05881	1.53196	1.34109	1.35195	-0.683722	-0.585884	-0.426437	-0.194149	0.513132
Trim30d	8.25542	9.14074	9.0485	19.9159	23.5974	19.3024	12.3159	10.2757	11.8546	11.0853	12.7916		-1.00475	-0.8324	-0.850356	1.26521	1.98189	1.14578	-0.214289	-0.611456	-0.304091	-0.453851	-0.121684
Dusp4	0.204761	0.375936	0.175796	0.821383	0.596967	0.381357	0.151547	0	0.146805	0.13937	0.269682		-0.388817	0.335164	-0.511324	2.21917	1.27001	0.358092	-0.613884	-1.25485	-0.63394	-0.665386	-0.114235
Irf9	35.7332	38.1546	36.9107	84.4677	89.2751	91.2657	41.5631	39.5003	41.1444	36.8615	50.8128		-0.763097	-0.657578	-0.711785	1.36063	1.57012	1.65687	-0.509045	-0.598936	-0.52729	-0.713929	-0.105966
Kcnip3	0.317624	0.240544	0.471403	0.949632	0.707387	0.811482	1.47423	0.504074	0.915438	1.0545	1.31177		-1.20904	-1.40377	-0.820535	0.387655	-0.224349	0.0386348	1.71299	-0.737996	0.301268	0.652592	1.30255
Hck	1.47335	0.737734	0.680104	3.73781	2.10867	1.09449	1.47847	1.38338	0.987737	0.492296	1.02064		0.101841	-0.712324	-0.776107	2.6081	0.804999	-0.317474	0.107507	0.00226377	-0.435626	-0.983969	-0.399209
Gbp4	35.5358	35.1178	35.5724	80.7113	79.9059	95.0485	41.8516	36.9435	40.191	39.82	50.9779		-0.74239	-0.761272	-0.740737	1.29828	1.2619	1.94592	-0.457092	-0.678801	-0.532105	-0.548864	-0.0448386
Jak3	62.8389	67.5042	65.596	169.418	151.015	154.839	75.9813	51.5869	55.4716	58.4217	74.4177		-0.598782	-0.494921	-0.537402	1.77392	1.36423	1.44936	-0.306201	-0.849278	-0.762795	-0.697119	-0.34101
Gm15987	1.49768	1.64982	0.826599	2.52928	2.4291	4.70703	1.42516	1.00838	1.27437	1.29384	1.56069		-0.312183	-0.172021	-0.930431	0.638201	0.545908	2.6445	-0.378994	-0.762962	-0.517912	-0.499975	-0.254134
Gbp9	28.2453	27.3776	29.5339	68.0879	69.5099	70.6929	34.2742	29.8865	31.6791	32.1957	35.766		-0.737322	-0.785343	-0.666007	1.46768	1.54638	1.61185	-0.403665	-0.646493	-0.547285	-0.518695	-0.321105
Gm9199	8.95806	9.09711	11.4848	23.0357	20.1995	29.0339	14.7843	9.96435	10.0209	11.8611	11.4954		-0.839288	-0.818379	-0.459343	1.27756	0.851084	2.17951	0.036802	-0.687972	-0.679469	-0.402759	-0.457749
Rgs1	14.3283	14.2005	12.8909	34.5796	37.2086	30.1155	16.0707	12.9344	16.2718	16.463	19.4712		-0.672864	-0.686998	-0.831836	1.56687	1.85763	1.07315	-0.48016	-0.827025	-0.457919	-0.436773	-0.104075
Rpl31-ps12	0.361243	0.397939	0.398754	1.05745	0.846303	0.946119	0.171875	0.948564	0.332995	0.368817	0		-0.474739	-0.371511	-0.369218	1.48374	0.889765	1.17055	-1.00744	1.17743	-0.554203	-0.453433	-1.49094
Map2k3os	0.190313	0.471703	0.42015	0.742792	1.02547	0.897197	0.679115	0.624664	0.745584	0.874365	0.886239		-2.01405	-0.873148	-1.08217	0.225993	1.37212	0.852034	-0.0321882	-0.252962	0.237313	0.75946	0.807604
Usp18	25.4977	27.4479	26.5422	64.6236	77.3681	54.3034	40.2644	32.5724	40.9683	38.7849	45.8822		-1.06389	-0.946111	-1.00081	1.299	2.06866	0.675743	-0.172099	-0.636633	-0.129589	-0.261448	0.167171
Hist1h1e	0.175001	0.481945	0.193172	0.683028	0.327987	1.10001	1.08242	2.75714	1.04856	0.982685	0.963102		-0.999063	-0.570447	-0.973689	-0.289656	-0.785434	0.292616	0.268053	2.60663	0.220771	0.128784	0.101438
Cysltr2	10.9678	11.0531	13.1109	29.1324	25.6127	34.6581	14.7745	11.9822	12.6605	14.731	16.9978		-0.835036	-0.824594	-0.572689	1.38857	0.957712	2.065	-0.369041	-0.710859	-0.627825	-0.374366	-0.0968766
Oas3	27.0248	26.4376	26.3927	63.2341	79.4292	62.3166	27.5713	24.1347	25.0148	26.9965	35.375		-0.580977	-0.610606	-0.612871	1.24608	2.06325	1.19978	-0.553401	-0.726806	-0.682397	-0.582405	-0.159642
Cish	17.4186	16.7967	17.1734	46.9035	42.5755	43.3192	23.2396	20.5167	19.9397	25.6995	40.5898		-0.921176	-0.97259	-0.941447	1.51641	1.1586	1.22008	-0.439941	-0.665049	-0.712751	-0.236576	0.994439
Pdcd1lg2	0.897801	0.74609	0.886708	2.61272	2.09595	1.84812	1.40889	1.24078	1.10346	1.46338	2.09375		-0.987156	-1.23975	-1.00563	1.86815	1.00774	0.595104	-0.136204	-0.416103	-0.644738	-0.0454795	1.00407
Irgm2	16.9147	17.4043	17.5917	41.582	43.0135	49.9755	20.6321	19.6465	19.6908	17.3786	23.7784		-0.748225	-0.708542	-0.693353	1.25109	1.36712	1.9314	-0.446925	-0.526809	-0.523218	-0.710625	-0.191913
Boll	0.305398	0.261023	0.0674151	0.715203	0.22895	0.703896	0.697484	0.427707	0.563053	0.748346	0.879181		-0.771148	-0.939321	-1.67306	0.781932	-1.06087	0.73908	0.71478	-0.307621	0.205313	0.907537	1.40338
Myh10	0.320314	0.345502	0.338842	0.755321	0.913008	0.964762	0.241302	0.163546	0.166088	0.224833	0.180802		-0.324874	-0.242359	-0.264177	1.10018	1.61676	1.7863	-0.583712	-0.838436	-0.830109	-0.637664	-0.781906
Xaf1	10.7907	8.52442	9.7711	25.3174	26.6703	24.3317	9.92973	9.11445	9.48019	9.74442	12.1422		-0.461063	-0.770713	-0.600374	1.52377	1.70862	1.38909	-0.5787	-0.690095	-0.640122	-0.60402	-0.276402
Irf7	75.5239	63.3869	71.9376	176.249	198.248	188.159	77.481	77.0721	72.8887	60.6316	70.5909		-0.499812	-0.721202	-0.565229	1.33751	1.73879	1.55476	-0.464112	-0.471571	-0.54788	-0.771461	-0.589794
Irgm1	35.5007	36.4907	36.9517	94.4545	96.1017	105.865	39.8718	40.8326	42.0121	38.1084	44.6633		-0.71408	-0.678788	-0.662354	1.38751	1.44623	1.79427	-0.558258	-0.524007	-0.48196	-0.62112	-0.38745
Bst2	94.6709	84.5605	83.3428	225.406	259.74	235.788	96.8517	94.5998	97.3885	98.6772	111.776		-0.58478	-0.732112	-0.749857	1.32035	1.82067	1.47164	-0.553	-0.585816	-0.545178	-0.526398	-0.335517
Insl3	21.4608	21.6256	23.5062	67.9603	56.6917	58.2824	26.9373	15.9326	20.3105	19.7633	22.6322		-0.575024	-0.566267	-0.466335	1.89588	1.29708	1.38161	-0.284012	-0.868782	-0.636149	-0.665226	-0.512778
Dtl	0.226613	0.263505	0.138963	0.356255	0.660706	0.712253	0.539138	0.451813	0.429422	0.591307	2.84332		-0.57377	-0.524445	-0.69096	-0.400436	0.0066208	0.0755401	-0.155918	-0.272673	-0.30261	-0.086167	2.92482
Ifitm2	1.43475	1.05366	1.45175	6.06647	2.91309	2.12936	2.16168	1.2558	1.21234	0.366207	0.607385		-0.282595	-0.525835	-0.271745	2.67371	0.660991	0.160756	0.181385	-0.396815	-0.424554	-0.964619	-0.810681
Serpina3g	16.1843	16.776	14.5152	44.3904	45.0059	44.8252	25.9246	18.5912	23.7471	24.035	33.3057		-0.978288	-0.929032	-1.11723	1.36969	1.42092	1.40588	-0.167471	-0.777929	-0.348734	-0.324768	0.446958
Oasl1	7.05956	6.35484	6.62954	18.3005	23.5246	16.4197	6.64251	5.27989	6.79892	5.00228	6.15562		-0.433437	-0.543553	-0.50063	1.32303	2.13932	1.02914	-0.498603	-0.71152	-0.474163	-0.754899	-0.574683
Gem	5.78926	4.9662	4.73162	17.2832	14.7056	13.0849	5.20418	5.86504	5.97242	4.3764	10.7628		-0.567141	-0.743836	-0.794196	1.90038	1.34702	0.999088	-0.692747	-0.550873	-0.527821	-0.870455	0.500579
Sema7a	2.19037	1.16108	1.72701	6.63673	4.0589	4.19255	0.407458	0.230639	0.364347	0.285842	0.585645		0.0969636	-0.390208	-0.122348	2.20146	0.981354	1.04461	-0.746903	-0.830593	-0.767308	-0.804465	-0.662566
Dhx58	10.2389	9.58842	10.847	28.072	35.2027	26.9963	12.2061	12.1096	10.2195	11.1084	13.4012		-0.672817	-0.744285	-0.606006	1.28648	2.06992	1.16829	-0.456684	-0.467286	-0.674949	-0.577287	-0.32538
Muc1	0.297652	0.163944	0.21904	0.919707	0.697325	0.41577	0.51927	0.217107	0.411565	0.126622	0.252016		-0.358517	-0.904465	-0.6795	2.18142	1.2734	0.123776	0.54638	-0.687393	0.106606	-1.05686	-0.544855
Dusp6	3.00375	2.90064	2.43291	10.3724	7.89611	6.72272	3.99047	2.40718	2.67897	3.44509	4.69008		-0.605463	-0.644707	-0.822723	2.19902	1.25655	0.809966	-0.22992	-0.832516	-0.729074	-0.43749	0.0363491
Igtp	47.8511	47.0457	46.6816	129.166	127.646	172.295	60.0065	56.1929	61.8198	54.2764	83.1009		-0.762355	-0.781131	-0.789619	1.13328	1.09785	2.13872	-0.478985	-0.567888	-0.436712	-0.612567	0.0593998
Cd69	18.7159	17.3121	18.7669	51.4405	50.7418	66.5301	31.6767	25.9168	28.9735	33.3667	31.9347		-0.977046	-1.06606	-0.973812	1.09792	1.05361	2.0547	-0.155243	-0.52046	-0.326644	-0.0480854	-0.138884
Mx1	13.5726	13.6176	13.4681	39.008	48.7088	37.956	21.1365	17.1183	18.0597	16.2374	19.6765		-0.804313	-0.800669	-0.812775	1.25533	2.04085	1.17014	-0.191823	-0.517199	-0.440968	-0.58853	-0.310047
Cmpk2	8.16673	6.5886	7.16317	20.5334	26.7857	20.6614	8.93212	8.18628	8.48086	6.74648	10.4149		-0.550454	-0.773582	-0.692345	1.19804	2.08203	1.21613	-0.442238	-0.54769	-0.50604	-0.75126	-0.232592
Stat1	49.9263	51.9707	49.5504	152.205	153.802	166.244	63.5663	53.762	59.7191	55.397	89.7309		-0.762108	-0.718904	-0.770052	1.39936	1.43311	1.69605	-0.473852	-0.681048	-0.555156	-0.646495	0.0790883
Zbp1	61.8151	55.3647	61.5543	178.586	188.087	196.099	62.5956	57.3794	59.7466	55.1205	78.718		-0.574608	-0.683302	-0.579003	1.39306	1.55316	1.68817	-0.561456	-0.649353	-0.609464	-0.687417	-0.289783
Ly6a	208.248	211.254	194.251	584.377	637.39	734.85	267.188	219.498	228.222	241.543	293.35		-0.692741	-0.677764	-0.762478	1.18125	1.44537	1.93095	-0.399084	-0.63669	-0.593224	-0.526855	-0.268737
Slfn5	12.5457	14.3113	12.922	38.7547	52.1551	38.4588	15.7734	14.4551	14.3128	14.5672	11.9324		-0.656392	-0.531637	-0.629803	1.1955	2.14236	1.17459	-0.428327	-0.521476	-0.531531	-0.513555	-0.699727
Gm4070	0.859425	0.792026	0.812435	2.5628	2.77127	2.86091	1.15385	0.827116	0.838083	1.02946	1.60963		-0.713254	-0.792614	-0.768583	1.2924	1.53786	1.64341	-0.366581	-0.751297	-0.738384	-0.513045	0.170081
Gadd45g	4.27237	4.00677	3.31395	13.6893	13.5258	11.4315	6.48279	5.00286	5.74777	5.5998	11.1453		-0.853488	-0.920479	-1.09523	1.5217	1.48046	0.952227	-0.295964	-0.66924	-0.481355	-0.518677	0.88004
Lilrb4a	10.2203	8.97102	13.0853	30.1473	33.824	44.9392	16.8172	9.56039	10.063	14.6647	28.4332		-0.804291	-0.906344	-0.570249	0.823543	1.12389	2.03189	-0.265391	-0.858199	-0.817141	-0.441228	0.683518
2810408I11Rik	0.0993616	0.328365	0.219358	0.387808	0.651784	1.14503	0.756401	0.347876	0.641144	1.11589	1.26191		-1.33367	-0.760558	-1.03336	-0.611793	0.0488464	1.28327	0.310666	-0.711729	0.0222182	1.21034	1.57578
Gm12185	1.67161	1.5126	1.43881	4.89323	5.51994	5.50385	1.6096	1.34991	1.56841	1.47301	1.98819		-0.524804	-0.615317	-0.657321	1.30905	1.66579	1.65663	-0.560102	-0.707926	-0.583549	-0.637853	-0.344596
Gm19705	3.37114	2.38731	1.5948	9.63321	6.77569	10.3428	5.49925	3.79374	2.00753	3.68767	5.91243		-0.550972	-0.883655	-1.15164	1.56655	0.60028	1.8065	0.168651	-0.408069	-1.01208	-0.443937	0.308368
Gm12250	13.707	15.144	16.9182	50.772	54.9652	65.2871	17.2818	13.9645	16.0505	14.8419	22.388		-0.703581	-0.629706	-0.538494	1.20192	1.41749	1.94814	-0.519802	-0.690343	-0.583103	-0.645236	-0.257293
Ppp1r2-ps3	0.252876	0.278564	0.0930448	0.246744	0.710912	1.41291	0.240631	0.073779	0.388504	0.430297	0.570947		-0.460876	-0.392962	-0.883434	-0.477087	0.750069	2.60599	-0.493249	-0.934368	-0.102306	0.00818566	0.380033
Fcgr4	0.918679	0.31958	0.960701	4.90662	2.1749	1.41832	1.15025	0.719458	0.66856	0.0987306	0.818765		-0.278737	-0.732394	-0.246917	2.74106	0.672515	0.0996075	-0.103384	-0.429594	-0.468135	-0.899629	-0.354395
Tlr7	0.338099	0.0775821	0.342113	0.769799	1.05594	1.11979	0.743277	0.443899	0.59901	0.244505	0.357829		-0.644151	-1.42212	-0.632164	0.645018	1.49951	1.69018	0.565816	-0.328205	0.134997	-0.923647	-0.585232
Ddit4	35.0036	28.8913	35.698	141.184	102.438	149.938	54.496	43.7001	34.47	46.9294	55.3124		-0.708296	-0.847128	-0.692523	1.70345	0.823383	1.90228	-0.265553	-0.510767	-0.720416	-0.437418	-0.247009
D17H6S56E-5	10.4327	10.6716	9.92455	42.1416	41.1708	42.2589	13.1031	10.2234	9.91561	13.2978	15.897		-0.666912	-0.650105	-0.702661	1.56385	1.49555	1.5721	-0.479046	-0.681637	-0.70329	-0.465349	-0.282492
Gzmb	134.118	113.496	146.34	437.426	489.471	671.312	91.409	113.592	103.282	86.3586	172.699		-0.488249	-0.590403	-0.427706	1.01422	1.27203	2.17281	-0.699813	-0.589927	-0.640999	-0.724831	-0.297134
Gatm	0.211419	0.232895	0.285232	1.58157	0.77047	0.689073	0.447069	0.328978	0.259849	0.167884	0.377897		-0.668851	-0.616647	-0.489427	2.66171	0.690089	0.492229	-0.0960336	-0.383089	-0.551128	-0.774676	-0.264177
Gbp6	5.21505	5.33834	5.24065	20.8224	21.473	25.5389	8.16943	6.33019	7.16554	6.47969	10.5284		-0.7743	-0.758128	-0.770942	1.27283	1.35816	1.89147	-0.38679	-0.628033	-0.518465	-0.608424	-0.0773773
Bcl3	7.87632	7.27591	8.69419	45.9002	30.4826	26.2487	17.0554	9.55386	9.71869	8.89627	13.0749		-0.719292	-0.767699	-0.653352	2.34633	1.10331	0.761957	0.0207596	-0.584042	-0.570753	-0.637059	-0.300163
Ifi27l2a	58.1116	62.3478	54.1634	224.685	299.007	271.716	72.8174	57.2722	80.3185	58.7451	117.12		-0.691447	-0.646514	-0.733325	1.07537	1.86369	1.57422	-0.535465	-0.70035	-0.455902	-0.684728	-0.0655541
Rtp4	17.2157	16.8891	16.3119	77.6109	89.4926	77.2902	18.2804	16.9764	20.1264	17.1618	24.8984		-0.621449	-0.632453	-0.651902	1.41352	1.81387	1.40272	-0.585574	-0.629512	-0.523375	-0.623265	-0.362585
Cd22	1.1553	1.84102	0.991315	6.76784	8.32897	4.60385	2.71974	2.1467	2.54984	2.34531	3.23723		-0.936291	-0.641765	-1.00672	1.47436	2.14489	0.544904	-0.264344	-0.510472	-0.337319	-0.425167	-0.042076
Tubb3	0.133182	0.440134	0.404282	1.59192	1.52886	1.98823	0.760397	0.408	0.429687	0.37393	0.225525		-0.970438	-0.48993	-0.546053	1.3131	1.21438	1.93349	0.0114162	-0.540233	-0.506284	-0.593567	-0.825883
Isg20	6.8872	5.73725	5.51885	29.0101	37.1832	34.2312	9.48224	6.50438	8.95026	7.95598	11.9824		-0.651405	-0.745378	-0.763225	1.15646	1.82436	1.58312	-0.43934	-0.682689	-0.482813	-0.564065	-0.235029
Zfp365	0.137266	0.123717	0.12397	0.730566	0.865342	0.653651	0.427479	0.163835	0.299076	0.293028	0.46488		-0.957693	-1.00917	-1.00821	1.29635	1.80838	1.00413	0.144872	-0.856753	-0.342951	-0.365928	0.286964
Tgtp2	2.28103	0.0466889	2.75363	9.39482	10.5374	9.90624	3.2021	3.37301	3.46054	3.57145	5.8945		-0.763121	-1.40259	-0.627862	1.27286	1.59987	1.41923	-0.499509	-0.450594	-0.425543	-0.3938	0.271062
Hbegf	0.116481	0.0513254	0.231437	0.772863	0.873236	0.732171	0.376858	0.30586	0.322118	0.332985	0.552284		-1.13143	-1.37089	-0.708931	1.28096	1.64986	1.1314	-0.174469	-0.435406	-0.375653	-0.335714	0.47027
Iigp1	0.277278	0.550116	0.632549	2.92345	3.45182	3.15815	2.49837	0.776633	1.63542	1.24562	2.33461		-1.29912	-1.06187	-0.990188	1.00188	1.46133	1.20597	0.632252	-0.864899	-0.118133	-0.457087	0.489853
Ifitm3	3.30331	1.38026	2.38897	18.2278	15.9047	13.4846	3.25174	3.29012	2.31001	1.16296	2.98973		-0.447391	-0.749195	-0.590887	1.89486	1.53027	1.15046	-0.455484	-0.449461	-0.603279	-0.783298	-0.496604
Mnda	0.608486	0.317462	0.45954	2.93775	3.4217	3.25483	1.61532	1.59794	1.44667	1.01368	2.30507		-1.00023	-1.26088	-1.13363	1.08586	1.51929	1.36984	-0.0985105	-0.114076	-0.249554	-0.637341	0.519232
Isg15	13.6516	13.8273	11.4283	81.0857	108.096	82.8353	19.9654	18.2041	18.3272	15.4345	25.134		-0.66472	-0.659737	-0.727773	1.24774	2.01376	1.29735	-0.485658	-0.535609	-0.532118	-0.614156	-0.339075
Ifi44	0.654646	0.762356	0.619391	3.81438	7.22142	4.23252	1.56626	0.785825	1.1207	0.744758	1.6945		-0.68821	-0.637298	-0.704875	0.80534	2.41579	1.00299	-0.257307	-0.626204	-0.467915	-0.645616	-0.19669
Ifit1	3.67788	3.45636	3.71574	23.438	33.0051	25.9264	4.82456	4.60141	4.94177	3.60649	5.61222		-0.627577	-0.647606	-0.624154	1.15909	2.02413	1.38409	-0.523896	-0.544073	-0.513299	-0.634032	-0.452678
Ifit3	6.1176	6.52167	5.41472	38.8414	52.0709	46.9892	7.96749	8.16763	9.97911	7.31084	9.95353		-0.660041	-0.637823	-0.69869	1.13933	1.86677	1.58735	-0.558322	-0.547317	-0.44771	-0.594429	-0.449117
Rsad2	1.00277	1.12019	1.10689	7.13855	11.2366	7.36847	2.12345	1.44635	1.54927	1.28334	2.10462		-0.68738	-0.653813	-0.657615	1.06663	2.23813	1.13236	-0.367015	-0.560575	-0.531154	-0.607174	-0.372398
Mx2	0.525528	0.478221	0.529175	3.27069	4.74378	4.39549	1.2802	0.55884	0.610832	0.675139	1.04255		-0.67769	-0.706292	-0.675485	0.982055	1.8727	1.66212	-0.22141	-0.657549	-0.626114	-0.587234	-0.365095
Ifi204	0.314437	0.266445	0.373787	3.18613	3.03726	2.15385	0.483341	0.381074	0.468219	0.197557	0.614372		-0.630456	-0.671967	-0.57912	1.85346	1.7247	0.960575	-0.48436	-0.572817	-0.49744	-0.731553	-0.371022
Serpina3f	0.987027	0.88741	1.02815	8.07712	7.76233	9.68303	2.29095	1.14845	1.21158	1.48933	3.91742		-0.746955	-0.776584	-0.734724	1.36181	1.26819	1.83945	-0.359136	-0.698944	-0.680168	-0.597558	0.124616
S100a8	0.537665	0.296141	0.296747	0.262313	0.503847	9.29398	0	1.17652	0	0	0.227615		-0.222983	-0.311661	-0.311438	-0.324081	-0.2354	2.99198	-0.420392	0.0115786	-0.420392	-0.420392	-0.336821
Oas2	0.456014	0.654562	0.427099	3.92371	6.37113	3.9232	1.2755	0.532186	0.942617	0.606659	1.26359		-0.705134	-0.604872	-0.719735	1.04597	2.28185	1.04571	-0.291314	-0.666669	-0.459412	-0.629062	-0.297328
Ifit3b	1.31402	0.985538	1.17272	9.60256	12.7591	10.3099	1.9155	2.08004	2.08751	1.74119	2.29613		-0.660914	-0.735987	-0.693207	1.2334	1.95481	1.39506	-0.523448	-0.485843	-0.484135	-0.563285	-0.436456
Cfb	0.159232	0.043852	0.285621	2.52384	0.987784	1.37515	0.321988	0.10453	0.238331	0.162571	0.168524		-0.547653	-0.698106	-0.382846	2.53573	0.532756	1.03787	-0.335424	-0.618983	-0.44451	-0.543299	-0.535537
Wfdc17	0.190845	0.420463	0.631985	6.70381	4.29218	1.59947	1.27122	0.668169	0.527765	0	0.484753		-0.6405	-0.530383	-0.428944	2.48291	1.32637	0.0350307	-0.122387	-0.411591	-0.478924	-0.732023	-0.499551
Cxcl10	0.620906	0.99488	0.996916	10.1893	12.2189	8.69274	1.45024	1.23515	1.09268	1.03733	2.62854		-0.716183	-0.630358	-0.62989	1.47971	1.9455	1.13626	-0.525855	-0.575217	-0.607913	-0.620616	-0.255441
S100a9	0.316089	0.351285	0.175904	0.933848	0.44833	8.6663	0.151613	0.414999	0.146863	0.645434	0.405064		-0.333323	-0.319263	-0.389321	-0.0865523	-0.280498	3.00226	-0.399025	-0.293812	-0.400922	-0.201762	-0.297781
Oasl2	1.48347	1.19713	1.04725	13.1117	21.0465	16.9147	5.35109	2.80828	4.45224	3.66317	4.95108		-0.787976	-0.829544	-0.851301	0.900067	2.05194	1.45214	-0.226523	-0.595657	-0.357007	-0.471554	-0.284591
Gbp10	0.273878	0.335222	0.251931	3.71162	4.3203	3.90532	0.767368	0.519392	0.603103	0.403896	0.966196		-0.724169	-0.686712	-0.737571	1.37498	1.74665	1.49326	-0.422835	-0.574254	-0.523139	-0.644778	-0.301427
Marco	0.283975	0.0938467	0.0626925	7.92474	3.67237	4.43275	0.162134	0.248557	0.104708	0.0579858	0.0961744		-0.483558	-0.555711	-0.567534	2.4161	0.802334	1.0909	-0.529796	-0.496999	-0.551589	-0.56932	-0.554828
