# Supplementary material for: Sepsis leads to lasting changes in phenotype and function of memory CD8 T cells
Source: eLife. 2021 Oct 15;10:e70989. doi: 10.7554/eLife.70989 (PMC8589447; doi:10.7554/eLife.70989)
Supplement: Figure 5—source data 2. [file elife-70989-fig5-data2.xlsx]

## Sheet: Figure 5-source data 2
gene_id	Group_A_0	Group_A_1	Group_A_2	Group_B_0	Group_B_1	Group_B_2	Group_C_0	Group_C_1	Group_C_2	Group_D_0	Group_D_1		heatmap z-scores
cluster 1
Cdc6	0.116845	0.0901035	0.102006	0.0798102	0.197107	0.183635	0.311358	0.296621	0.236984	0.178951	2.06787		-0.407355	-0.453871	-0.433167	-0.471776	-0.26774	-0.291175	-0.0690026	-0.0946374	-0.198375	-0.299323	2.98642
Tppp3	0.0922347	0.152407	0.169688	0.089998	0.201679	0.193256	0.190166	0.234415	0.141705	0.251119	1.57575		-0.485602	-0.344495	-0.303971	-0.490847	-0.228951	-0.248703	-0.255949	-0.152183	-0.369592	-0.113012	2.9933
Neil3	0.226613	0.263505	0.138963	0.356255	0.660706	0.712253	0.539138	0.451813	0.429422	0.591307	2.84332		-0.57377	-0.524445	-0.69096	-0.400436	0.0066208	0.0755401	-0.155918	-0.272673	-0.30261	-0.086167	2.92482
Hist1h1e	0.279082	0.273273	0.37652	0.272315	0.377764	0.584748	0.236061	0.48855	0.314428	0.506549	2.07413		-0.46919	-0.480239	-0.283864	-0.482061	-0.281498	0.112184	-0.551016	-0.0707836	-0.401962	-0.0365496	2.94498
Mcm10	0.348473	0.27918	0.297236	0.370934	0.905448	0.713545	0.512471	0.360468	0.423432	0.436639	2.53471		-0.466967	-0.573236	-0.545545	-0.43252	0.387226	0.0929182	-0.215455	-0.448571	-0.352007	-0.331753	2.88591
Ttc8	0.142215	0.164907	0.156983	0.102249	0.231469	0.141147	0.199432	0.248956	0.220791	0.152839	1.34353		-0.394638	-0.330679	-0.353013	-0.507284	-0.14307	-0.397648	-0.233368	-0.0937817	-0.173166	-0.364693	2.99134
Stmn1	0.0993616	0.328365	0.219358	0.387808	0.651784	1.14503	0.756401	0.347876	0.641144	1.11589	1.26191		-1.33367	-0.760558	-1.03336	-0.611793	0.0488464	1.28327	0.310666	-0.711729	0.0222182	1.21034	1.57578
Gpr34	0.643073	0.916752	0.334047	0.184553	0.567177	1.18888	0.755918	0.761528	0.836877	0.695178	4.61204		-0.331285	-0.10576	-0.585938	-0.709129	-0.393827	0.118488	-0.238295	-0.233672	-0.171581	-0.288348	2.93935
Ppp2r2c	0.0740498	0.163144	0.0544927	0.0722541	0.0231307	0.206871	0.164416	0.36728	0.273038	0.0756024	0.898649		-0.56828	-0.210899	-0.646729	-0.575483	-0.77253	-0.0354985	-0.205797	0.607945	0.229915	-0.562052	2.73941
Kntc1	0.254045	0.303173	0.338847	0.134271	0.466213	0.454664	0.49356	0.426191	0.31224	0.291793	2.14199		-0.465288	-0.376202	-0.311512	-0.68248	-0.080553	-0.101495	-0.0309633	-0.153127	-0.35976	-0.396838	2.95822
Bfsp1	0.145372	0.0873486	0.189643	0.154742	0.185766	0.124605	0.440148	0.300751	0.353284	0.49923	0.660174		-0.76494	-1.08157	-0.523359	-0.713809	-0.544515	-0.878263	0.843615	0.0829432	0.369609	1.16602	2.04427
Birc5	1.05942	1.08448	1.28217	1.02165	1.87226	1.32005	1.52606	1.24466	1.4054	1.45446	6.29801		-0.47388	-0.457376	-0.327181	-0.498755	0.0614422	-0.302234	-0.166559	-0.351884	-0.246024	-0.213714	2.97616
Ccdc136	0.0801518	0.220735	0.0884747	0.0391041	0.112666	0.377861	0.114406	0.315698	0.221653	0.204581	0.780424		-0.726386	-0.0553959	-0.686662	-0.922303	-0.571199	0.694552	-0.562894	0.397854	-0.0510144	-0.132497	2.61595
Gm5124	0.168305	0.185402	0.167203	0.197068	0.173491	0.177588	0.432421	0.338823	0.449922	0.652745	0.641067		-0.824889	-0.735355	-0.83066	-0.674262	-0.797731	-0.776276	0.558246	0.0680876	0.649896	1.71205	1.65089
Ccnb2	0.152625	0.189146	0.126355	0.186155	0.205599	0.239841	0.226929	0.175336	0.246209	0.243477	0.823808		-0.537427	-0.347474	-0.674062	-0.363031	-0.261899	-0.0838001	-0.150958	-0.419303	-0.0506789	-0.0648886	2.95352
Apol7b	0.915284	0.893032	0.865993	0.842055	1.32333	1.34243	1.04515	1.14447	1.03656	1.25487	4.4283		-0.443473	-0.465082	-0.49134	-0.514586	-0.0472173	-0.0286692	-0.317359	-0.220909	-0.325701	-0.113699	2.96804
Tktl1	0.251979	0.158615	0.15894	0.386366	0.303596	0.301692	0.513809	0.378089	0.199093	0.661533	0.731472		-0.595387	-1.07556	-1.07389	0.0957742	-0.329918	-0.33971	0.751222	0.053205	-0.867384	1.51098	1.87068
Dtl	0.592859	0.543371	0.618075	1.18721	1.38924	0.96461	0.720416	0.489787	0.941345	1.37652	2.3125		-0.7773	-0.868998	-0.730577	0.323989	0.698336	-0.0884727	-0.540946	-0.968285	-0.131581	0.674766	2.40907
Pask	1.1113	0.863994	1.12879	1.00061	1.81321	1.94421	1.27265	0.9623	0.967356	1.46694	4.37399		-0.423256	-0.669229	-0.40586	-0.533349	0.27487	0.405164	-0.262776	-0.571453	-0.566424	-0.0695331	2.82185
Crip2	0.195513	0.158697	0.0908695	0.0803251	0.125358	0.161704	0.166462	0.171129	0.227653	0.0945533	0.845111		-0.0703854	-0.241345	-0.55631	-0.605274	-0.396158	-0.227381	-0.205287	-0.183615	0.0788605	-0.539204	2.9461
Clspn	0.417366	0.536445	0.204738	0.331184	0.333238	0.753106	0.483074	0.588699	0.470206	0.686547	1.80839		-0.426347	-0.150151	-0.919523	-0.62624	-0.621476	0.352379	-0.273941	-0.0289516	-0.303788	0.198	2.80004
Mki67	1.45001	1.44492	1.09156	0.809915	0.998702	1.58885	1.36517	1.70866	1.42637	1.26594	6.48988		-0.212016	-0.215233	-0.438573	-0.616586	-0.497264	-0.124262	-0.265639	-0.0485365	-0.226957	-0.328357	2.97342
Fam64a	0.548171	0.603856	0.286622	0.309666	0.405546	0.664953	0.329448	0.631318	0.558496	0.29456	2.36948		-0.149126	-0.0551724	-0.590419	-0.551538	-0.389767	0.0479122	-0.518162	-0.00883771	-0.131705	-0.577026	2.92384
2810408I11Rik	0.318173	0.161728	0.243129	0.143244	0.252274	0.102502	0.719351	0.364192	0.494535	0.924695	0.660714		-0.299756	-0.882878	-0.57947	-0.951774	-0.545384	-1.10363	1.19557	-0.128229	0.357603	1.96095	0.977006
Rad51ap1	1.8819	2.46177	1.93542	3.15605	3.08622	5.03589	4.74538	3.50311	4.5456	5.70406	8.06656		-1.15007	-0.83686	-1.12117	-0.461846	-0.499565	0.553544	0.396626	-0.274383	0.288716	0.914455	2.19055
Tnfsf4	0.0900571	0.317458	0.298226	0.281195	0.489478	0.471731	0.359924	0.3153	0.199236	0.257447	1.11324		-1.08904	-0.238457	-0.310394	-0.374098	0.40498	0.338598	-0.0796137	-0.246529	-0.680663	-0.462927	2.73815
E2f1	0.488316	0.153691	0.259252	0.544541	0.39223	0.438489	0.544819	0.244235	0.342805	0.213667	1.53566		0.0513647	-0.833073	-0.554068	0.199971	-0.202597	-0.0803316	0.200706	-0.593759	-0.333231	-0.674552	2.81957
Cep55	0.448339	0.246942	0.171309	0.252385	0.371662	0.415497	0.344585	0.332049	0.254327	0.334502	1.1972		0.18448	-0.541524	-0.814169	-0.521903	-0.0919283	0.0660898	-0.189537	-0.234727	-0.514902	-0.225884	2.884
Morn3	0.840928	1.49981	0.618832	2.10995	1.7637	1.09073	1.60041	1.15664	1.40269	2.5348	3.28875		-1.012	-0.164749	-1.29759	0.619822	0.174584	-0.690779	-0.0353888	-0.606026	-0.289634	1.16613	2.13562
Aurkb	2.98924	3.07355	2.9142	3.83327	5.23526	4.88857	2.81126	3.28209	3.58446	3.1132	12.2328		-0.501651	-0.470792	-0.529117	-0.192722	0.32043	0.193535	-0.566795	-0.394463	-0.283791	-0.45628	2.88165
Hist2h2bb	1.43708	0.725341	0.643098	0.510308	0.574161	0.72582	1.11087	2.08675	0.828406	0.8298	4.56132		0.136427	-0.465347	-0.534883	-0.647156	-0.593169	-0.464942	-0.139383	0.685721	-0.378205	-0.377027	2.77796
Exo1	1.4963	1.33275	2.04605	3.67416	2.0759	1.79168	2.69864	0.917559	1.33972	1.6949	6.04666		-0.539937	-0.65217	-0.162684	0.954569	-0.1422	-0.337239	0.285141	-0.937085	-0.647387	-0.403652	2.58264
Fcrlb	0.629339	0.315123	0.505228	0.446602	0.428913	0.119875	0.925517	0.82627	0.89656	1.4311	1.23524		-0.190749	-0.978407	-0.501863	-0.648823	-0.693165	-1.46784	0.551693	0.302906	0.479105	1.81906	1.32809
Tmem176a	0.597118	0.65778	0.757995	0.378715	0.391693	0.406612	1.27846	1.20208	1.04581	1.64602	2.07283		-0.630763	-0.521915	-0.342095	-1.02265	-0.999366	-0.972596	0.591799	0.454747	0.174344	1.25133	2.01717
Socs2	0.361609	0.242418	0.298439	0.537009	0.648379	0.527097	0.493607	0.357681	0.304373	0.69035	0.851986		-0.634705	-1.25793	-0.965008	0.282427	0.864759	0.230599	0.0554866	-0.655243	-0.93398	1.08422	1.92938
Ncapg2	0.684116	0.861269	0.431516	0.715207	1.099	1.3822	0.790485	0.898188	0.855843	0.74835	2.56515		-0.557622	-0.247692	-0.999546	-0.503228	0.168219	0.663678	-0.371529	-0.183102	-0.257185	-0.445244	2.73325
Klra9	1.48274	1.25643	1.81656	1.2719	2.32089	2.47513	1.81407	1.99663	1.33676	1.64691	5.53207		-0.497773	-0.684395	-0.222495	-0.671638	0.193391	0.320582	-0.224548	-0.0740038	-0.618153	-0.362394	2.84143
Chek1	0.251622	0.138592	0.218232	0.280595	0.303166	0.263606	0.307849	0.377554	0.281649	0.440397	0.578261		-0.520357	-1.48071	-0.804054	-0.274188	-0.0824136	-0.418535	-0.0426246	0.549623	-0.265233	1.08357	2.25493
Rad51	22.5108	20.4369	19.2395	6.62985	9.19098	13.9888	29.2357	36.1485	30.9353	24.7322	76.0879		-0.200655	-0.31091	-0.374568	-1.04494	-0.908779	-0.653711	0.156862	0.524368	0.247218	-0.0825586	2.64767
Dscc1	0.782351	0.55714	0.523387	0.462654	0.659088	0.728543	0.857264	0.80928	0.866866	0.742277	2.18124		-0.109831	-0.592057	-0.664329	-0.794372	-0.373764	-0.225045	0.0505744	-0.0521698	0.0711344	-0.195638	2.8855
Bzrap1	2.957	3.12127	3.27549	2.62103	3.20758	3.3875	4.17841	4.82789	4.73876	6.70775	7.94308		-0.775721	-0.678642	-0.587502	-0.974271	-0.627635	-0.521307	-0.0538995	0.329926	0.277253	1.44087	2.17092
Cd300e	0.425008	0.275401	0.303562	0.268337	0.257708	0.104765	0.689906	0.372001	0.507003	0.663642	0.910199		-0.0392386	-0.669573	-0.550923	-0.699336	-0.744118	-1.38851	1.07685	-0.262571	0.306228	0.966191	2.005
Gm1720	2.08702	2.75883	1.53582	2.51157	2.15132	4.00843	2.25075	2.0094	2.30859	2.48591	5.94903		-0.523398	0.0214138	-0.970399	-0.179104	-0.471253	1.03479	-0.390619	-0.586345	-0.343713	-0.199914	2.60854
Brca1	1.09848	0.504194	0.707316	1.02718	0.600475	0.719246	1.00173	1.12172	1.13915	0.841132	2.51891		0.134763	-0.961308	-0.58668	0.00326064	-0.783732	-0.564677	-0.043678	0.177625	0.209772	-0.339877	2.75453
Gm14124	0.150524	0.352357	0.353078	0.23867	0.405537	0.512502	0.465514	0.27997	0.364229	0.34578	0.860258		-1.31824	-0.223183	-0.219271	-0.839996	0.0653471	0.64569	0.390755	-0.615921	-0.158771	-0.258867	2.53245
Shcbp1	10.2203	8.97102	13.0853	30.1473	33.824	44.9392	16.8172	9.56039	10.063	14.6647	28.4332		-0.804291	-0.906344	-0.570249	0.823543	1.12389	2.03189	-0.265391	-0.858199	-0.817141	-0.441228	0.683518
Nebl	0.209859	0.375663	0.23165	0.255962	0.270406	0.16489	0.374431	0.344409	0.169268	0.214259	0.843996		-0.545252	0.322249	-0.43124	-0.304037	-0.228465	-0.780534	0.315803	0.158725	-0.757628	-0.522231	2.77261
Ckap2l	0.541552	0.760836	0.667094	0.566711	0.581038	0.583789	0.843942	0.741927	0.680076	0.873432	1.71447		-0.714997	-0.0511026	-0.334912	-0.638827	-0.595451	-0.587122	0.200505	-0.108351	-0.295608	0.289788	2.83608
Cdkn2a	0.759007	0.723557	0.563918	0.783328	0.779658	0.978653	0.583358	0.740997	0.780386	0.625898	1.91555		-0.214752	-0.309352	-0.735354	-0.149851	-0.159644	0.371381	-0.683478	-0.262813	-0.157702	-0.569958	2.87152
Phlda3	1.71924	2.94944	1.75662	2.62353	3.72779	3.76117	2.92176	2.26269	2.49446	2.06564	6.20306		-0.964943	-0.00295445	-0.935712	-0.257809	0.605697	0.6318	-0.0245996	-0.539977	-0.358738	-0.694066	2.5413
Adgre4	17.4186	16.7967	17.1734	46.9035	42.5755	43.3192	23.2396	20.5167	19.9397	25.6995	40.5898		-0.921176	-0.97259	-0.941447	1.51641	1.1586	1.22008	-0.439941	-0.665049	-0.712751	-0.236576	0.994439
Klri2	0.675532	0.902007	0.647761	0.432776	0.645832	0.600478	0.986957	0.883933	0.704479	0.710596	1.9412		-0.386648	0.179723	-0.456098	-0.993734	-0.460922	-0.574343	0.392167	0.134524	-0.314257	-0.298959	2.77855
Mmp25	3.56475	2.45429	1.47559	2.06524	2.29662	2.56749	3.07412	3.70518	1.84838	3.52576	5.28185		0.618246	-0.408809	-1.314	-0.768637	-0.554636	-0.304111	0.164467	0.748128	-0.969209	0.582184	2.20638
Nenf	0.37207	0.452237	0.326823	0.48683	0.610172	0.310062	0.458661	0.429288	0.319593	0.648129	0.572773		-0.687858	-0.00925821	-1.07087	0.283565	1.32763	-1.21274	0.0451198	-0.203517	-1.13207	1.64893	1.01106
Igf1	0.729501	0.829451	0.852728	0.864201	0.916308	1.22295	0.771011	0.751322	0.789041	0.506606	0.494704		-0.324888	0.182992	0.301271	0.359569	0.624342	2.1825	-0.113962	-0.214008	-0.022345	-1.45749	-1.51797
Rac3	0.525427	0.644951	0.596558	0.644519	0.548651	0.50327	0.514269	0.551874	0.581209	0.291212	0.432158		-0.0490208	1.13572	0.656038	1.13143	0.181178	-0.268644	-0.15962	0.213125	0.503897	-2.37059	-0.973514
Trf	4.2718	2.04949	3.12107	3.30829	1.54848	1.17972	3.66893	3.5676	2.3243	1.28717	2.53905		1.58034	-0.551212	0.476603	0.656177	-1.03176	-1.38546	1.00209	0.904897	-0.287626	-1.2824	-0.0816462
Chaf1a	2.49549	1.57467	2.38021	1.43025	1.75957	1.87827	2.4784	1.91917	1.69735	1.33574	1.17952		1.45551	-0.558066	1.20343	-0.873873	-0.153741	0.105824	1.41814	0.195261	-0.289799	-1.08054	-1.42215
Orc1	0.646635	0.407042	0.509843	0.540818	0.432831	0.516139	0.468817	0.512083	0.510918	0.345816	0.260711		1.71639	-0.589993	0.399594	0.697767	-0.341742	0.460201	0.00466785	0.421157	0.409942	-1.17937	-1.99861
Fignl1	1.36811	1.40993	1.94571	1.29197	1.03395	0.693519	1.25986	1.89887	1.08322	0.876736	0.747334		0.315577	0.416391	1.70797	0.13203	-0.489968	-1.31063	0.0546236	1.59506	-0.371195	-0.868958	-1.1809
D430020J02Rik	1.28727	1.51755	1.42094	1.59761	1.83062	1.94006	0.913329	1.50229	0.947208	0.380444	0.98474		-0.0321422	0.470161	0.259428	0.644793	1.15305	1.39177	-0.847809	0.436875	-0.77391	-2.01018	-0.692042
Cenph	0.886944	1.28888	1.0832	0.626053	0.58357	0.810564	1.00561	1.1232	0.869775	0.520195	0.575194		0.136164	1.70721	0.90327	-0.883579	-1.04963	-0.162382	0.599994	1.05962	0.069056	-1.29735	-1.08237
Blvrb	1.20009	1.60529	1.60857	0.83642	1.12461	1.16744	1.79453	1.12544	1.26428	0.700144	0.798358		-0.0062319	1.14242	1.15172	-1.03716	-0.220202	-0.0987878	1.67888	-0.217849	0.175733	-1.42347	-1.14506
Cpne7	3.50501	2.25944	1.83418	1.74801	1.77609	2.25756	1.45764	2.22704	1.79496	1.37839	1.01119		2.41593	0.503179	-0.149869	-0.282196	-0.239075	0.500292	-0.728101	0.453424	-0.210097	-0.8498	-1.41369
Psrc1	1.42556	0.978835	1.36861	1.40135	1.03601	0.811822	1.27815	1.08523	0.904807	0.443052	0.787327		1.23383	-0.223481	1.04805	1.15485	-0.0369647	-0.768312	0.752946	0.123601	-0.464976	-1.97132	-0.84822
Uhrf1	4.65353	3.4597	6.51078	5.92345	4.48646	6.80116	3.77216	3.95581	2.94803	0.958042	3.51849		0.22568	-0.47975	1.32312	0.976072	0.126959	1.49471	-0.295118	-0.1866	-0.782094	-1.95797	-0.445011
Plbd1	3.91615	4.31397	4.69182	5.63859	5.41525	4.70306	3.77196	3.92935	3.08165	2.29169	1.6983		-0.0279059	0.298487	0.608496	1.38528	1.20204	0.617718	-0.146207	-0.0170759	-0.712576	-1.3607	-1.84755
Rgs12	2.97951	2.10396	2.1926	3.87635	2.14778	1.92087	2.39904	2.07295	1.7606	0.935996	1.29369		1.05377	-0.0625667	0.0504503	2.19725	-0.00669566	-0.296008	0.313664	-0.102105	-0.500354	-1.55173	-1.09567
Hpgd	1.54901	1.45041	1.36789	0.755726	1.37901	0.892534	0.515902	1.69477	1.14231	0.474448	0.721336		1.07277	0.844435	0.653341	-0.764268	0.679092	-0.447457	-1.31964	1.41031	0.130958	-1.41563	-0.843906
P2rx7	0.726811	0.386517	0.636292	0.611367	0.399263	0.13128	0.548523	0.614225	0.392745	0.179115	0.318298		1.42971	-0.32468	0.96304	0.834539	-0.258968	-1.64056	0.510545	0.849273	-0.292572	-1.39395	-0.676385
Bub1b	0.664015	0.650194	0.610805	0.215971	0.103708	0.0772933	0.386137	0.904087	0.544082	0.263643	0.281104		0.893118	0.840957	0.692301	-0.797817	-1.2215	-1.32119	-0.155604	1.79916	0.440486	-0.617901	-0.552003
4833418N02Rik	1.53066	0.91333	1.3376	1.12016	0.717192	0.26726	1.69929	1.00481	0.999435	0.520917	0.539991		1.2725	-0.124237	0.83569	0.343724	-0.568007	-1.586	1.65403	0.08274	0.0705789	-1.01209	-0.968931
Ube2c	3.01048	1.76869	2.34831	3.11373	2.82113	4.60463	0.840312	2.05531	1.18403	0.778646	0.883623		0.733655	-0.298809	0.183105	0.8195	0.576223	2.05908	-1.07069	-0.0605041	-0.784914	-1.12196	-1.03468
Cadm1	1.36541	0.688969	0.964469	0.927135	0.586096	0.432506	0.927055	1.2829	0.588362	0.27015	0.519296		1.69428	-0.255089	0.538848	0.431259	-0.551549	-0.994166	0.431028	1.4565	-0.545019	-1.46204	-0.744054
Tyrobp	0.83656	0.342287	0.606823	1.09614	0.425568	0.15024	0.591352	0.711302	0.506752	0.146417	0.344031		1.08751	-0.628989	0.289687	1.98898	-0.339772	-1.29593	0.23596	0.65252	-0.0578376	-1.3092	-0.622932
Jup	1.62864	0.921284	1.55481	2.31929	0.824972	0.553363	1.50789	1.84931	0.77093	0.314581	0.782638		0.715607	-0.423681	0.596695	1.82799	-0.578804	-1.01627	0.521124	1.07103	-0.665846	-1.40085	-0.646988
Pyroxd2	3.63409	2.66883	2.34001	2.21623	2.69603	3.80716	1.44088	3.0483	2.0937	0.927571	1.02564		1.33646	0.328376	-0.0150323	-0.144304	0.356783	1.51721	-0.954053	0.724682	-0.27227	-1.49014	-1.38772
Gins1	7.76196	6.46097	7.5244	4.82095	5.91637	7.69102	3.63758	4.8154	4.30914	2.26974	2.32627		1.25586	0.610479	1.13802	-0.20309	0.340318	1.22067	-0.790127	-0.205843	-0.456985	-1.46867	-1.44063
Gm4013	1.08816	0.416938	0.783359	1.98505	0.753703	0.545209	0.810364	0.7868	0.610564	0.289819	0.240345		0.695296	-0.707559	0.0582613	2.5698	-0.00371982	-0.439473	0.114702	0.065453	-0.302881	-0.973238	-1.07664
Axl	5.43312	4.84084	4.90954	5.56124	5.96491	7.61708	2.76242	6.97007	3.5598	1.08765	2.20986		0.397947	0.104918	0.138908	0.461334	0.661049	1.47846	-0.923374	1.15835	-0.528873	-1.75196	-1.19675
Nr6a1	1.63255	0.770741	1.32397	1.30038	0.999099	0.279234	0.982827	1.57475	0.829229	0.34016	0.479557		1.43923	-0.393241	0.783095	0.732935	0.0923189	-1.43834	0.0577196	1.31633	-0.268877	-1.30879	-1.01239
Hspa2	4.96654	1.82369	3.92895	3.0692	2.89592	2.22576	3.41325	3.88825	2.49257	0.957795	1.35497		1.78497	-0.828143	0.922266	0.207431	0.0633581	-0.493844	0.49349	0.888427	-0.272006	-1.54809	-1.21786
Spry2	0.884573	0.524694	0.643797	0.493213	0.318821	0.193487	0.73999	0.663641	0.37634	0.198488	0.230446		1.72319	0.194661	0.700533	0.0609506	-0.679753	-1.21209	1.1091	0.784817	-0.435449	-1.19085	-1.05511
Mpeg1	1.30513	0.550046	0.99211	1.21636	0.52923	0.346331	0.976503	1.05796	0.520591	0.284781	0.311973		1.50061	-0.488716	0.675935	1.26674	-0.543557	-1.02542	0.634817	0.849422	-0.566317	-1.18758	-1.11594
Ticrr	5.39073	1.86824	3.3764	6.70798	4.17188	3.0141	3.83286	3.71109	2.20543	0.64932	1.5385		1.18536	-0.826319	0.0349859	1.93764	0.489282	-0.171922	0.295668	0.226126	-0.633751	-1.52244	-1.01463
Plxdc1	1.38092	0.422554	0.677471	0.355572	0.305542	0.241114	1.11329	0.570769	0.49503	0.195815	0.292299		2.19837	-0.33729	0.337175	-0.514512	-0.646882	-0.817347	1.49027	0.0548606	-0.145531	-0.9372	-0.681921
Ly86	0.775483	0.266956	0.722256	0.260108	0.0908383	0.025388	0.737931	0.509073	0.536133	0.173194	0.184665		1.40167	-0.443933	1.20849	-0.468787	-1.08312	-1.32066	1.26538	0.434784	0.532993	-0.784225	-0.742593
Cd302	1.3598	0.696714	0.814497	0.935979	0.533417	0.38651	1.07328	1.11639	0.680178	0.290577	0.276673		1.73271	-0.127563	0.202874	0.543689	-0.585688	-0.997831	0.928883	1.04983	-0.173954	-1.26697	-1.30598
C6	1.22981	0.88058	0.984195	2.96997	1.49819	1.44943	0.936206	1.29171	0.566822	0.345289	0.208251		0.142305	-0.32595	-0.187021	2.47555	0.502154	0.436776	-0.251366	0.225301	-0.746644	-1.04368	-1.22742
Slc37a2	1.84202	0.857136	1.80542	3.25382	1.29462	0.831788	1.70749	1.47329	0.892904	0.453948	0.349566		0.608895	-0.59044	0.564326	2.3281	-0.0576969	-0.621307	0.445073	0.159877	-0.546884	-1.08142	-1.20853
Gm2011	3.14756	1.62993	2.56868	1.91624	1.36135	1.00051	2.41915	3.19061	1.7235	0.563059	0.831381		1.44651	-0.245566	0.80109	0.0736544	-0.545018	-0.947336	0.634372	1.49451	-0.14124	-1.43507	-1.13591
H2-T3	2.3567	1.77628	1.67723	1.84569	1.88882	2.76131	0.590151	1.05852	0.657441	0.284934	0.446332		1.15785	0.459152	0.339917	0.542706	0.594625	1.64491	-0.968688	-0.404874	-0.887685	-1.3361	-1.14181
Wnt2b	1.71444	0.586117	0.848345	2.85541	1.1634	1.23868	1.26576	0.802051	0.463214	0.150895	0.325354		0.889535	-0.593374	-0.248738	2.38907	0.165326	0.264263	0.299853	-0.30958	-0.7549	-1.16537	-0.936084
Clec12a	1.63279	0.629531	1.57705	1.43388	1.18582	1.96714	0.388432	0.750304	0.752558	0.166703	0.241929		1.06851	-0.561433	0.977951	0.74535	0.34234	1.61171	-0.953134	-0.36522	-0.361558	-1.31337	-1.19115
Mmp17	36.9366	11.7762	19.2467	29.4945	11.8487	10.0022	19.6436	28.3289	15.8688	4.85501	5.3683		1.86515	-0.559119	0.160683	1.14808	-0.552134	-0.730049	0.198925	1.03578	-0.164787	-1.22599	-1.17654
Ncaph	144.945	399.172	559.984	141.43	135.828	227.772	206.889	190.3	534.443	147.984	0		-0.5618	0.873818	1.78192	-0.581649	-0.613283	-0.0940763	-0.212003	-0.30568	1.63769	-0.544639	-1.3803
Kcnj10	2.28311	0.849449	1.83589	6.80126	2.19618	1.48896	2.02867	1.64103	0.878069	0.277865	0.422457		0.226051	-0.582079	-0.0260396	2.77285	0.17705	-0.221598	0.0826272	-0.135879	-0.565947	-0.904271	-0.822767
Cd163	1.0534	0.406141	0.79941	1.28481	0.678658	0.331069	0.639021	0.749137	0.424823	0.134435	0.144932		1.2419	-0.54744	0.539747	1.88163	0.20593	-0.754976	0.0963537	0.400768	-0.495794	-1.29857	-1.26955
Il11	0.754642	0.399025	0.599762	0.633255	0.297014	0.28461	0.603204	0.792627	0.361729	0.0770465	0.127788		1.25746	-0.202004	0.62183	0.759286	-0.620661	-0.671568	0.635956	1.41336	-0.355068	-1.52342	-1.31517
cluster 2
Syk	0	0.262794	0.263332	0.465551	0.223555	0.374883	0	0.208807	0.109953	0.608906	0.403968		-1.40137	-0.0148759	-0.0120374	1.05487	-0.2219	0.576504	-1.40137	-0.29971	-0.821263	1.81121	0.729956
9030619P08Rik	0.163674	0.631052	0.271004	0.479115	0.843586	0.428673	0.155748	0.501411	0.226313	0.835529	0.762187		-1.22182	0.574004	-0.809423	-0.00978993	1.39063	-0.203605	-1.25228	0.0758789	-0.981141	1.35967	1.07787
Prss16	0.49187	0.563803	0.564957	0.4994	0.747459	0.501369	0.385827	0.517792	0.435027	0.475038	1.80089		-0.359718	-0.178754	-0.175851	-0.340774	0.283275	-0.335821	-0.626493	-0.294505	-0.502719	-0.402063	2.93342
Tcf4	0.657823	0.334287	0.223422	0.345618	0.379536	0.583125	0.424017	0.354356	0.372967	0.206651	1.7132		0.35417	-0.413908	-0.677103	-0.387008	-0.306486	0.176836	-0.200888	-0.366264	-0.322081	-0.716917	2.85965
Itgad	0.715596	0.717887	0.705268	0.847883	0.874032	0.87739	0.508769	0.618881	0.636057	0.600127	2.10089		-0.277741	-0.272483	-0.301444	0.0258569	0.0858686	0.0935752	-0.752408	-0.499701	-0.460282	-0.542742	2.9015
Abcc3	0.71023	0.823556	0.371358	0.547111	0.56047	0.822377	0.604697	0.523494	0.447948	0.992271	1.58247		-0.046667	0.288725	-1.04957	-0.529423	-0.489887	0.285236	-0.358995	-0.599318	-0.822899	0.788043	2.53476
Hfe	1.64956	1.67999	1.18527	2.04991	1.93955	2.6574	0.636758	0.653807	0.573801	1.12806	1.22536		0.378709	0.424544	-0.320623	0.981732	0.815504	1.89676	-1.14681	-1.12113	-1.24164	-0.406795	-0.260238
Fcgr3	5.74461	5.01088	4.81408	6.26879	8.76707	7.09903	4.75245	4.76134	4.84152	6.10445	12.3681		-0.28585	-0.6001	-0.684388	-0.0613481	1.00864	0.294237	-0.710783	-0.706976	-0.672635	-0.131733	2.55093
Rab3il1	0.675191	0.534592	0.815174	0.679406	0.869994	0.884185	0.461794	0.480172	0.544595	0.732432	1.23267		-0.193627	-0.813495	0.423526	-0.175044	0.665215	0.72778	-1.13445	-1.05342	-0.769395	0.0587356	2.26417
Lrp1	0.796133	0.861061	1.08653	0.875706	0.990232	1.15252	0.592303	0.803065	0.747238	0.783268	2.13252		-0.454529	-0.29718	0.249229	-0.261689	0.0158572	0.409152	-0.948498	-0.43773	-0.573023	-0.485707	2.78412
Cd5l	0.390606	0.414349	0.343336	0.543469	0.698183	0.522878	0.289093	0.335558	0.393401	0.243709	0.839044		-0.360132	-0.228944	-0.621315	0.484489	1.33934	0.370716	-0.921026	-0.664291	-0.344688	-1.17179	2.11764
Mir2861	0.260908	0.198978	0.332308	0.332914	0.282113	0.315386	0.248274	0.316201	0.203505	0.368832	0.611739		-0.487027	-1.03891	0.14925	0.154651	-0.298059	-0.00154897	-0.599614	0.00571386	-0.99857	0.474732	2.63938
Il18	0.514768	0.198471	0.198877	0.401828	0.578869	0.350535	0.244921	0.360453	0.260984	0.525562	0.414052		1.09793	-1.27014	-1.2671	0.252367	1.57785	-0.131656	-0.922372	-0.0574017	-0.802111	1.17874	0.343886
Mir155hg	2.09844	2.27242	1.13854	1.6658	1.86646	2.16112	1.69222	1.02732	1.60649	1.96087	3.64375		0.255465	0.506261	-1.12825	-0.368195	-0.078939	0.34582	-0.33011	-1.28858	-0.453691	0.057155	2.48306
Irf4	1.50298	1.85511	1.89122	1.57622	1.9118	2.42439	1.60122	1.71965	1.93906	1.66781	4.68516		-0.628376	-0.238432	-0.198444	-0.547271	-0.175654	0.391982	-0.519587	-0.388439	-0.145467	-0.445846	2.89553
Cmklr1	0.570229	0.453667	0.664409	0.880968	0.771857	0.431446	0.602907	0.554566	0.525639	0.857105	1.04607		-0.504193	-1.09928	-0.0233749	1.08223	0.525181	-1.21272	-0.337362	-0.584158	-0.731839	0.960398	1.92512
Mt3	15.3119	15.4044	15.2979	17.7459	22.4204	21.183	15.1858	15.5459	14.9704	15.8084	32.8514		-0.554251	-0.537313	-0.556815	-0.108546	0.74743	0.520842	-0.577342	-0.511402	-0.616785	-0.463334	2.65752
Cd163l1	5.21299	5.74255	4.94668	6.51439	6.34206	7.18587	5.48272	4.56282	5.39549	6.06928	11.0731		-0.573446	-0.274796	-0.723634	0.160489	0.0633022	0.539176	-0.42133	-0.940115	-0.470524	-0.0905342	2.73141
Palm	1.3236	1.76501	1.07656	1.83529	1.69732	1.60558	1.39208	1.64632	1.02745	1.13798	3.42098		-0.465096	0.205301	-0.840292	0.31204	0.102496	-0.0368355	-0.361091	0.0250389	-0.914878	-0.747009	2.72033
Hmox1	1.6785	2.33559	2.19409	1.68089	2.35938	2.49883	1.63925	1.66246	1.50653	2.16466	3.77727		-0.705889	0.307661	0.0893994	-0.702202	0.344356	0.559455	-0.766431	-0.73063	-0.971149	0.0440042	2.53142
Mertk	0.300559	0.421389	0.452412	0.479898	0.30726	0.572498	0.286005	0.286989	0.453366	0.502137	0.647762		-1.04393	-0.0557578	0.197956	0.422743	-0.989132	1.18005	-1.16296	-1.15491	0.205758	0.604619	1.79558
Esm1	0.86296	0.577162	0.510302	0.721742	0.924208	0.872327	0.439911	0.566496	0.312507	0.755189	0.600176		1.09791	-0.371114	-0.71478	0.372041	1.41273	1.14606	-1.0766	-0.425938	-1.73146	0.543961	-0.25282
Lrrc25	0.721551	0.51334	0.497797	0.726056	0.655037	0.803161	0.486349	0.493405	0.498847	0.42973	1.06912		0.4937	-0.59076	-0.671715	0.517164	0.147264	0.918763	-0.731342	-0.694591	-0.666246	-1.02624	2.304
Lgmn	1.07608	1.15717	1.18782	1.39999	1.48859	1.39575	1.17026	0.20183	1.13365	1.2556	1.27988		-0.241647	-0.00471478	0.0848396	0.704766	0.963641	0.692377	0.0335321	-2.79606	-0.0734364	0.282882	0.353824
Mafb	2.85564	3.07332	3.42627	3.05007	3.84636	3.79503	2.96755	3.10038	2.72659	2.79621	6.48666		-0.57009	-0.366714	-0.0369562	-0.388436	0.355529	0.307572	-0.465533	-0.341432	-0.69066	-0.625615	2.82233
Havcr2	9.41189	9.42039	11.2972	10.5243	11.0947	11.9962	8.63038	8.0028	8.07443	9.06173	17.3361		-0.389061	-0.385847	0.323747	0.0315247	0.247185	0.588028	-0.684538	-0.921817	-0.894735	-0.521451	2.60697
Epb4.1l3	0.970126	0.85494	1.28503	0.978154	0.757589	1.62613	0.892377	0.481174	1.16255	1.18856	1.56063		-0.289918	-0.628208	0.634922	-0.266341	-0.914117	1.6367	-0.518259	-1.72592	0.275211	0.3516	1.44433
Siglece	1.76712	2.10325	1.50219	1.54589	1.77017	2.36197	1.12103	1.08448	1.14213	0.953927	2.54523		0.259644	0.882653	-0.231398	-0.150401	0.265297	1.36218	-0.937869	-1.00561	-0.898761	-1.24759	1.70185
Prr5	0.662102	0.682305	0.848733	0.625206	0.600442	0.895013	0.873927	0.785161	0.728457	0.588761	0.434004		-0.284336	-0.141047	1.03934	-0.54602	-0.721658	1.36758	1.21803	0.588456	0.186284	-0.804505	-1.90211
Pla2g7	12.0259	10.0652	11.6728	9.58412	9.2171	12.5002	15.8037	15.1246	13.8477	10.6182	8.24809		0.132404	-0.665867	-0.0113558	-0.861732	-1.01116	0.325508	1.67048	1.39399	0.874123	-0.440721	-1.40568
Dusp14	0.612176	0.559578	0.560723	0.571913	0.524848	0.600396	0.570138	0.604228	0.600326	0.292559	0.408037		0.760835	0.22984	0.241399	0.354366	-0.120772	0.641912	0.336447	0.680597	0.641205	-2.46581	-1.30002
Tgm2	1.60805	1.02855	1.03066	1.21475	0.874976	1.46726	1.28338	1.40749	1.57794	0.635521	1.05407		1.33991	-0.555658	-0.548756	0.0534079	-1.058	0.879376	0.277899	0.683867	1.24141	-1.84127	-0.472182
Riiad1	227.813	306.511	239.805	255.884	216.953	194.583	293.824	301.44	279.389	156.194	218.073		-0.350437	1.29359	-0.0999202	0.235975	-0.577305	-1.04462	1.02855	1.18765	0.727001	-1.84658	-0.553908
Lilrb4a	0.801885	0.741378	0.806524	0.65669	0.818539	0.78007	0.667673	1.09041	0.950373	0.453208	0.606193		0.238855	-0.116168	0.266074	-0.613072	0.336572	0.110856	-0.54863	1.93177	1.1101	-1.807	-0.909362
Ninj2	5.00912	4.20416	2.63298	2.5602	2.23526	4.99779	5.67447	5.84583	4.61743	3.1659	3.63524		0.744616	0.117997	-1.10508	-1.16174	-1.41469	0.735796	1.26256	1.39595	0.439706	-0.690234	-0.324877
Cish	0.800975	0.546211	0.547329	0.669901	0.428911	0.559415	1.05255	0.80123	0.984456	0.623062	0.5167		0.579151	-0.688845	-0.68328	-0.0732223	-1.27266	-0.623127	1.83128	0.58042	1.49236	-0.306347	-0.835725
Cenpe	0.116803	0.128669	0.386796	0.189951	0.182428	0.244732	0.703932	0.374863	0.358899	0.278255	0.230755		-1.04593	-0.974501	0.579359	-0.605599	-0.650885	-0.275831	2.48844	0.507525	0.411426	-0.0740309	-0.359969
Cenpm	1.26309	0.672509	1.51043	0.903804	0.710186	1.03654	1.65265	1.63991	1.42629	0.548068	1.40809		0.252412	-1.2085	0.864255	-0.636351	-1.1153	-0.308003	1.21606	1.18455	0.656118	-1.51633	0.611097
Tpx2	0.676372	0.408588	0.6021	0.375918	0.470257	0.411432	0.581333	0.80575	0.715595	0.467792	0.42486		0.941785	-0.907528	0.428864	-1.13315	-0.481642	-0.887887	0.285447	1.83527	1.21266	-0.498666	-0.795154
Oip5	11.8777	6.28887	9.00853	10.0942	6.71425	6.66321	9.55243	11.1676	7.84081	5.04627	5.5149		1.6011	-0.806353	0.36517	0.832834	-0.623116	-0.645102	0.599461	1.29521	-0.137838	-1.34162	-1.13975
Cdca7	0.746062	0.363143	0.383038	0.37245	0.406475	0.272649	0.660405	0.728944	0.543782	0.495994	0.308493		1.5834	-0.696562	-0.578104	-0.641147	-0.438557	-1.23538	1.07338	1.48148	0.378992	0.0944541	-1.02196
Ckap2	1.91198	1.32853	1.41824	1.40666	1.05242	0.91996	2.13779	1.70166	1.57869	1.03645	1.11823		1.27519	-0.234467	-0.00234519	-0.0323081	-0.948893	-1.29163	1.85947	0.730995	0.412814	-0.990215	-0.778612
Ncapg	0.518728	0.571422	0.254485	0.393671	0.405084	0.362289	0.822681	0.681047	0.55786	0.353069	0.365997		0.227738	0.542279	-1.34958	-0.518751	-0.450624	-0.706076	2.04209	1.19665	0.461324	-0.761112	-0.683942
Ssc4d	1.30116	1.49566	1.31138	1.65601	1.11329	1.12607	2.31481	1.38646	1.87735	0.981893	0.862175		-0.240033	0.221172	-0.215799	0.6014	-0.685518	-0.655213	2.16357	-0.0377669	1.12625	-0.997091	-1.28097
Stkld1	1.71175	3.59984	2.57658	2.2776	1.74991	2.60839	2.81348	4.22235	3.01235	2.22426	1.31755		-0.992829	1.22801	0.0244144	-0.327256	-0.947944	0.0618304	0.303064	1.96023	0.536982	-0.389997	-1.4565
Cdca8	4.20854	2.27573	3.37853	3.13563	2.00762	1.84362	6.69836	5.55857	2.96229	1.95302	4.0813		0.474822	-0.757687	-0.0544564	-0.209348	-0.928654	-1.03323	2.06252	1.3357	-0.319883	-0.963471	0.393684
Cdc45	0.33605	0.213568	0.399483	0.378348	0.266464	0.203107	0.418171	0.746662	0.393174	0.237527	0.284527		-0.107903	-0.913186	0.30915	0.170193	-0.565411	-0.981964	0.432018	2.59175	0.26767	-0.755663	-0.446652
Lrp11	7.57116	5.00416	7.60517	5.02354	5.53406	6.97994	5.69158	8.81374	6.56038	3.78765	3.33338		0.935828	-0.584772	0.955975	-0.573292	-0.270878	0.585611	-0.177568	1.67189	0.337078	-1.30539	-1.57448
Mcm5	1.09947	0.828687	0.702631	0.508172	1.03031	0.727473	1.04623	2.12728	1.70694	0.708961	0.930898		0.128603	-0.437116	-0.700472	-1.10674	-0.0158859	-0.648572	0.0173741	2.2759	1.39773	-0.687247	-0.223577
Cks1b	0.640515	0.488479	0.382263	0.528831	0.277028	0.550543	0.726709	0.668442	0.317923	0.226365	0.33373		1.0159	0.123966	-0.499157	0.360694	-1.11653	0.488069	1.52156	1.17973	-0.876612	-1.41374	-0.783879
Apitd1	2.54308	0.755439	1.35627	1.36617	1.17818	0.508893	1.71299	2.75112	2.02815	0.816847	1.83867		1.3981	-1.07466	-0.243558	-0.229864	-0.489902	-1.4157	0.249876	1.68588	0.685823	-0.989718	0.423724
Spc24	0.441563	0.410414	0.548348	0.525111	0.413788	0.43371	0.709074	0.579746	0.432475	0.267665	0.268731		-0.121532	-0.361635	0.70159	0.522474	-0.335628	-0.182065	1.9405	0.943613	-0.191584	-1.46198	-1.45376
Serpine2	1.0695	0.719986	1.21336	0.481195	1.01973	0.915035	1.11949	1.69542	1.1836	0.394301	0.910558		0.262306	-0.70522	0.660541	-1.36624	0.124533	-0.165285	0.400689	1.99498	0.578159	-1.60678	-0.177678
Brip1	0.289833	0.12771	0.415908	0.197964	0.217283	0.0910912	0.413698	0.735687	0.320604	0.147955	0.441713		-0.102728	-0.969815	0.571562	-0.594074	-0.490749	-1.16566	0.559742	2.28184	0.061845	-0.861538	0.709575
Pole	0.135109	0.198445	0.845117	0.439442	0.211018	0.424631	1.1571	0.709547	0.166059	0.183922	0.419444		-0.934726	-0.743396	1.21013	-0.0153714	-0.705414	-0.0601137	2.15259	0.800585	-0.84123	-0.787268	-0.075783
Lig1	13.9709	6.46383	10.6409	9.54245	5.62961	4.6836	13.2943	16.0192	11.7193	7.1319	8.28019		1.13787	-0.891404	0.237723	-0.0592048	-1.11691	-1.37263	0.954979	1.69156	0.529232	-0.710814	-0.400413
Cenpn	7.93663	4.54321	5.53716	3.75631	3.94622	3.32733	7.95488	8.15181	6.08319	4.44858	4.1437		1.36804	-0.490656	0.0537646	-0.921668	-0.817648	-1.15663	1.37803	1.4859	0.352844	-0.542488	-0.709481
Gm19434	0.827535	0.499506	0.679293	0.775993	0.481779	0.252471	0.70117	0.823093	0.552341	0.246046	0.435293		1.22727	-0.338433	0.5197	0.981253	-0.423044	-1.51754	0.62412	1.20606	-0.0862486	-1.54821	-0.644924
Carns1	0.491029	0.216364	0.243908	0.311429	0.207065	0.205766	0.770965	0.365319	0.27158	0.250662	0.207872		0.981219	-0.613185	-0.453295	-0.061342	-0.667165	-0.674706	2.60622	0.251484	-0.292662	-0.414089	-0.662481
Mpp2	3.0351	2.27825	2.87588	1.38902	1.51019	1.4632	2.55586	3.12674	2.74825	1.97441	1.63737		1.19464	0.0633856	0.956655	-1.26573	-1.08462	-1.15486	0.478325	1.33161	0.765888	-0.39076	-0.894529
Mustn1	3.67607	1.3716	1.04717	2.25629	0.666745	1.55288	5.47277	1.66069	1.47569	0.847484	1.90763		1.19107	-0.440811	-0.670553	0.185672	-0.939946	-0.31244	2.46339	-0.236095	-0.367101	-0.811958	-0.0612275
Rn45s	0.52499	0.771094	0.772672	0.683013	0.32798	0.549994	0.999136	3.21659	0.806564	0.535998	1.03716		-0.513928	-0.201303	-0.199298	-0.313192	-0.76419	-0.482166	0.0883787	2.90521	-0.156245	-0.499945	0.136681
Sema6b	0.620308	0.683321	0.547776	0.524564	0.503786	0.519881	0.983784	0.47055	0.991125	0.295547	0.420162		0.109717	0.399339	-0.223655	-0.330342	-0.425843	-0.351866	1.78033	-0.578602	1.81407	-1.38295	-0.810196
Cfp	1132.95	2017.03	1288.49	1306.47	1093.86	731.326	1938.38	1532.54	1065.45	630.929	833.283		-0.222965	1.73354	0.121251	0.161041	-0.309473	-1.11177	1.55948	0.661343	-0.372345	-1.33396	-0.88614
App	1.08321	0.779487	0.762465	1.33142	0.37534	0.349491	1.49845	0.836896	1.10854	0.576087	0.452243		0.650011	-0.136342	-0.180413	1.29264	-1.1827	-1.24962	1.72509	0.0122926	0.715591	-0.662954	-0.983592
Car9	0.515123	0.361105	0.361844	0.36555	0.131652	0.294358	0.891234	1.18867	0.647513	0.38249	0.515443		0.0034542	-0.511197	-0.508727	-0.496344	-1.27791	-0.734232	1.26023	2.25411	0.445835	-0.439739	0.00452348
1700102P08Rik	0.540916	0.536278	0.417958	0.844478	0.202757	0.226671	0.823556	0.757523	0.54848	0.165677	0.412184		0.178124	0.158936	-0.330576	1.43402	-1.2209	-1.12197	1.34746	1.07427	0.209418	-1.37431	-0.354464
Snhg10	0.936894	0.656748	1.10535	1.05223	0.622725	0.404178	1.07016	1.27005	0.628196	0.286431	0.549316		0.488228	-0.384692	1.01313	0.84761	-0.490706	-1.17169	0.903479	1.52633	-0.473659	-1.53858	-0.719445
Lima1	0.502906	0.331625	0.333601	0.589619	0.188797	0.105522	0.702601	0.52838	0.704421	0.205696	0.340385		0.439056	-0.389481	-0.379922	0.858513	-1.08038	-1.48321	1.40504	0.562282	1.41384	-0.998637	-0.347106
Selm	2.28076	0.879359	1.41615	1.08491	0.828207	0.716817	1.51922	1.72181	1.70822	0.378395	1.23106		1.8851	-0.681218	0.30178	-0.304803	-0.77489	-0.978873	0.490527	0.86152	0.836634	-1.59861	-0.0371657
Slc41a3	1.79104	0.950169	1.4873	1.26675	0.754514	0.568067	1.65894	1.86968	0.908797	0.643535	0.695623		1.32683	-0.4	0.703065	0.250138	-0.801802	-1.18469	1.05555	1.48833	-0.484963	-1.02971	-0.922742
Src	2.40057	0.58874	1.42674	2.03732	0.993818	0.59494	1.80284	1.89969	1.12161	0.477442	0.729554		1.66963	-1.02849	0.219432	1.12869	-0.425261	-1.01926	0.779508	0.923734	-0.234957	-1.19423	-0.818794
Miat	0.659534	0.458863	0.728019	0.711282	0.422877	0.254559	0.792754	0.486127	0.607962	0.10632	0.382073		0.700636	-0.239812	1.02159	0.943154	-0.408461	-1.19729	1.32497	-0.112039	0.458943	-1.89201	-0.59969
Cd79a	0.414951	0.334037	0.140935	0.124581	0.254249	0.284236	0.546725	0.754333	0.514909	0.179237	0.283767		0.343697	-0.0739256	-1.07059	-1.15499	-0.485737	-0.330964	1.02382	2.09536	0.859612	-0.872898	-0.333385
Plxnb2	1.90518	0.769529	0.939344	2.0077	0.868869	0.625387	1.97004	1.83432	1.21763	0.5187	0.591462		1.15639	-0.717545	-0.437333	1.32556	-0.553624	-0.955394	1.26342	1.03947	0.0218667	-1.13144	-1.01137
Pla2g2d	0.746481	0.488237	0.64377	0.295886	0.153028	0.293244	1.28753	1.51099	1.5483	1.04795	0.829545		-0.117119	-0.642152	-0.325939	-1.03322	-1.32366	-1.03859	0.982882	1.4372	1.51305	0.495794	0.0517576
Lyz2	0.604248	0.199689	0.266797	0.471676	0.226497	0.25321	0.632487	0.528885	0.389899	0.246767	0.102321		1.38771	-0.87916	-0.503132	0.644871	-0.728946	-0.579264	1.54595	0.965431	0.186648	-0.615366	-1.42474
Cdk3-ps	1.63061	0.718221	2.17646	0.783103	1.9202	1.63822	1.95274	4.51201	2.08684	0.876106	0.964962		-0.112624	-0.967144	0.398605	-0.906378	0.158599	-0.105497	0.189075	2.58602	0.314669	-0.819273	-0.736053
Mir6236	1.5326	0.745988	1.49503	1.14766	0.400801	0.746788	1.59405	1.62222	0.887081	0.509449	0.573368		1.08417	-0.589948	1.00421	0.264916	-1.3246	-0.588246	1.21495	1.2749	-0.289665	-1.09337	-0.957329
Smagp	4.48084	3.54381	4.10908	1.72645	2.02413	1.70919	4.72304	5.89303	5.44373	2.53373	2.85997		0.625172	-0.003973	0.375563	-1.22419	-1.02432	-1.23578	0.787791	1.57335	1.27168	-0.682166	-0.46312
AF251705	1.29814	0.894868	1.24682	0.709332	1.25483	0.610991	1.54942	2.09036	2.4141	0.469909	0.925534		0.122063	-0.542124	0.0375389	-0.847701	0.0507313	-1.00967	0.53592	1.42685	1.96004	-1.24203	-0.491618
Gfra2	3.61806	1.5264	2.33677	2.89186	1.55097	1.0484	3.88237	3.40263	1.88045	0.864534	1.23837		1.30222	-0.623613	0.122511	0.633593	-0.600991	-1.06372	1.54558	1.10387	-0.297632	-1.23301	-0.888808
Tmem91	14.1045	5.78585	9.64111	15.7203	7.35527	5.74975	13.3654	14.9797	6.4736	2.34983	4.79679		1.06713	-0.713878	0.111528	1.41307	-0.377867	-0.721607	0.908894	1.25451	-0.566632	-1.44953	-0.925634
Pld4	0.758529	0.860159	0.837293	0.282993	0.146345	0.467444	1.0827	2.32373	1.23391	0.842766	1.19002		-0.261512	-0.087707	-0.126812	-1.07476	-1.30845	-0.759318	0.292877	2.41525	0.551472	-0.117452	0.476413
Itgb5	1.65793	1.42496	1.58876	0.444431	0.529266	0.76347	1.45629	2.47175	2.04892	0.911452	1.45002		0.504521	0.134054	0.394527	-1.42517	-1.29027	-0.917839	0.183875	1.79865	1.12627	-0.68252	0.173905
Treml4	3.31642	0.996358	1.83039	2.79472	1.48328	0.789628	3.22755	2.6389	2.77917	0.461721	1.27634		1.3188	-0.94214	-0.129362	0.810395	-0.467626	-1.1436	1.23219	0.658545	0.795241	-1.46315	-0.669293
Cd14	0.781162	0.457721	0.917316	0.535175	0.327077	0.296005	0.996386	0.931043	0.643475	0.288472	0.337733		0.686949	-0.487394	1.18129	-0.206175	-0.961733	-1.07455	1.46838	1.23113	0.187038	-1.1019	-0.923043
Marcks	18.0882	7.27549	11.6909	14.2242	6.63522	5.36076	13.532	16.7696	8.88537	3.46265	4.63478		1.58411	-0.547002	0.323246	0.822543	-0.673195	-0.924382	0.686115	1.32422	-0.229705	-1.29849	-1.06747
Cmbl	33.6561	15.9635	24.569	19.6137	9.83306	8.59351	33.7931	28.9629	17.0009	9.77543	9.95854		1.48933	-0.339416	0.550068	0.0378772	-0.973072	-1.10119	1.50349	1.00423	-0.232188	-0.979029	-0.960102
Klra3	0.209856	0.308233	0.540511	0.204768	0.0655523	0.219851	0.599083	1.04087	0.644822	0.357094	0.236908		-0.687416	-0.336383	0.492441	-0.705571	-1.20233	-0.651752	0.70144	2.27784	0.864648	-0.162035	-0.590888
Ctsh	0.888073	0.34676	0.63703	1.02384	0.308609	0.219849	0.797506	1.13615	0.508616	0.0938839	0.355352		0.905826	-0.656143	0.181437	1.29758	-0.766229	-1.02235	0.644493	1.62166	-0.189105	-1.38582	-0.631351
Klra8	1.02215	0.608032	0.789803	0.977418	0.325673	0.299833	0.758671	1.41357	0.88569	0.229588	0.380792		0.873216	-0.246513	0.244976	0.752266	-1.00998	-1.07985	0.160798	1.93157	0.504244	-1.26978	-0.860945
Cd81	2.56145	1.17659	2.00867	2.05544	0.973109	0.611285	2.46564	2.84792	1.36746	0.706798	0.619636		1.17452	-0.484922	0.512141	0.568184	-0.728749	-1.16231	1.05972	1.51779	-0.256207	-1.04786	-1.15231
C1qb	2.88815	1.24172	1.81785	2.67674	1.22829	1.00203	3.35221	2.99247	1.59879	0.479249	0.926156		1.07351	-0.607455	-0.0192412	0.857664	-0.621167	-0.852173	1.5473	1.18002	-0.242896	-1.38592	-0.929638
Aif1	0.680639	0.230699	0.232548	0.255431	0.147189	0.27425	0.736234	0.736812	0.48262	0.0719134	0.322829		1.25357	-0.617538	-0.609849	-0.514689	-0.96482	-0.436428	1.48476	1.48717	0.430093	-1.27786	-0.234409
Bank1	4.37911	3.40515	4.4547	0.753998	2.49438	2.60865	3.75852	7.59082	3.56183	1.22729	1.96284		0.582707	0.0612916	0.623175	-1.35802	-0.426295	-0.36512	0.25047	2.30212	0.145171	-1.10464	-0.710858
C1qc	1.23598	0.471997	0.61849	0.611042	0.29342	0.172645	1.09772	1.19722	0.607641	0.38698	0.237201		1.58072	-0.412257	-0.0301054	-0.0495348	-0.878104	-1.19317	1.22005	1.47961	-0.0584068	-0.634038	-1.02476
Apoe	20.0459	6.40893	11.2545	11.4099	4.69626	4.58634	14.1968	15.7307	9.133	3.11698	4.19434		1.90625	-0.564562	0.313381	0.341537	-0.874871	-0.894787	0.846481	1.1244	-0.0710022	-1.16101	-0.965812
Clec4a3	0.694644	0.279709	0.343245	0.273489	0.13703	0.130296	0.579843	0.765407	0.449362	0.126981	0.2786		1.443	-0.395466	-0.113955	-0.423025	-1.02764	-1.05747	0.934347	1.75653	0.356221	-1.07216	-0.400379
Tgfbi	11.1476	3.5061	6.97411	6.1803	2.98259	2.86988	8.70927	9.38308	5.37152	1.98851	2.35962		1.76449	-0.660928	0.43982	0.187864	-0.82709	-0.862864	0.99056	1.20443	-0.068843	-1.14261	-1.02482
Mrc1	0.741248	0.21984	0.566459	0.417273	0.213731	0.179204	0.922386	0.499076	0.289083	0.116429	0.193108		1.32486	-0.676969	0.653799	0.0810318	-0.700423	-0.832982	2.0203	0.395096	-0.411125	-1.07399	-0.7796
Sirpa	7.15037	2.98982	5.20107	5.9553	2.65959	1.76087	6.81723	7.70564	4.17827	1.25188	1.77306		1.19734	-0.558375	0.374754	0.693033	-0.697729	-1.07698	1.05676	1.43166	-0.0568588	-1.29177	-1.07184
Clec1b	4.50473	3.02251	4.15881	0.959016	0.882654	0.900952	5.76741	5.4842	5.47372	2.96856	3.32864		0.588695	-0.204501	0.403579	-1.30876	-1.34962	-1.33983	1.26441	1.11285	1.10724	-0.233372	-0.0406785
Klra14-ps	10.7695	3.05348	6.06929	4.56692	2.17172	1.66618	5.83747	12.4491	5.23595	1.71657	2.26996		1.56818	-0.556056	0.274202	-0.139403	-0.798806	-0.937982	0.210381	2.03058	0.0447818	-0.92411	-0.771761
Ccr3	1.08884	0.314142	0.693833	0.321546	0.0897402	0.119835	1.12116	0.827328	0.509494	0.35074	0.290342		1.56502	-0.568755	0.477041	-0.548362	-1.18683	-1.10394	1.65404	0.844731	-0.0306898	-0.467951	-0.634308
C1qa	2.94376	1.06261	1.67061	0.973686	0.748096	0.226505	2.26312	3.02788	1.76305	0.679205	0.619585		1.55646	-0.40701	0.227597	-0.499825	-0.735287	-1.2797	0.846036	1.64426	0.324082	-0.807193	-0.869422
Vcam1	0.801703	0.328025	0.556255	0.402306	0.193186	0	0.566712	0.78191	0.380064	0.11693	0.193939		1.55681	-0.246708	0.62227	0.0361142	-0.760103	-1.49565	0.662085	1.48144	-0.0485715	-1.05045	-0.757236
Tbxas1	2.50117	1.24136	1.9727	1.09949	0.592677	0.345749	2.45936	2.06893	1.44453	0.336967	0.558768		1.42394	-0.106784	0.781823	-0.279162	-0.89496	-1.19499	1.37313	0.898746	0.140075	-1.20566	-0.936161
Csf1r	10.6535	3.47334	5.48435	3.21643	1.5669	0.950925	7.34937	9.78472	5.3726	1.7559	1.88761		1.77238	-0.358533	0.238292	-0.434778	-0.924324	-1.10713	0.79179	1.51455	0.205127	-0.868232	-0.829144
Fcna	3.07127	1.02969	2.02674	1.04236	0.218986	0.20984	2.41428	2.77588	2.03102	0.681668	0.734892		1.55848	-0.436088	0.538001	-0.423709	-1.22812	-1.23706	0.916617	1.26989	0.542183	-0.776095	-0.724097
Adgre1	10.1722	3.84865	6.87353	2.29587	0.846337	0.522876	7.91561	10.2765	6.222	2.15961	2.09279		1.47773	-0.274316	0.563776	-0.70454	-1.10616	-1.19578	0.852502	1.50662	0.383259	-0.742293	-0.760806
Adamdec1	1.58483	0.627141	1.17193	0.330299	0.0720946	0.0805976	1.55201	1.97975	0.936114	0.267059	0.325691		1.14815	-0.273884	0.53505	-0.714653	-1.09805	-1.08542	1.09942	1.73455	0.184897	-0.808555	-0.721495
Tnfrsf8	3.14555	1.63063	1.77013	0.180545	0.28899	0.193845	2.5237	4.85865	2.89958	0.692677	2.29773		0.868425	-0.156542	-0.0621592	-1.13764	-1.06427	-1.12864	0.447692	2.02748	0.702006	-0.791144	0.294805
cluster 3
Aldh2	0.489266	0.261784	0.401195	0.231881	0.301295	0.292896	0.372459	0.342595	0.270605	0.299715	1.27826		0.257867	-0.510323	-0.0395426	-0.611303	-0.376897	-0.40526	-0.136582	-0.23743	-0.480535	-0.382233	2.92224
Slc40a1	0.647752	0.3984	0.222827	0.268594	0.321075	0.288385	0.380374	0.417625	0.372223	0.299785	1.55377		0.47194	-0.190376	-0.656723	-0.53516	-0.395762	-0.482592	-0.238255	-0.139311	-0.259906	-0.452312	2.87846
Zfp385a	0.783437	0.479456	0.480437	0.339751	0.407867	0.182389	0.497	0.380959	0.320967	0.977611	0.737023		1.17916	-0.121725	-0.117527	-0.719594	-0.428091	-1.39303	-0.0466455	-0.543244	-0.79998	2.01013	0.980535
Spag5	4.39881	3.98989	3.92009	3.41599	3.70614	4.50261	3.11055	3.1084	3.40383	3.11076	8.86676		0.157704	-0.0909297	-0.13337	-0.439876	-0.263457	0.220817	-0.625591	-0.626898	-0.447269	-0.625464	2.87433
Nusap1	0.686829	0.150773	0.344616	0.333883	0.409596	0.286782	0.260488	0.419307	0.40291	0.419229	0.898718		1.29047	-1.29601	-0.360716	-0.412503	-0.0471865	-0.639766	-0.766635	-0.000330733	-0.0794465	-0.000707084	2.31283
B9d1	0.574055	0.556049	0.524411	0.473217	0.528673	0.508075	0.461493	0.372512	0.25546	0.555776	0.729061		0.588143	0.437991	0.174163	-0.252743	0.209703	0.037937	-0.350509	-1.09252	-2.06861	0.435715	1.88073
Top2a	0.818814	0.943946	0.924858	0.706057	0.910069	0.797964	0.706684	0.833361	0.737234	0.991514	1.62839		-0.350054	0.135695	0.0615976	-0.787765	0.00418821	-0.430992	-0.785331	-0.293584	-0.666739	0.320349	2.79263
Alox5ap	2.33355	3.09883	3.97619	3.45311	2.65802	2.34456	2.70893	1.11512	1.94699	3.17024	3.11091		-0.495118	0.486175	1.61119	0.940457	-0.0790611	-0.481001	-0.0137809	-2.05747	-0.990792	0.577742	0.501665
Sgol2a	0.388418	0.405355	0.27079	0.299209	0.440616	0.299833	0.330703	0.339974	0.358045	0.542663	0.553879		0.0412556	0.219536	-1.19691	-0.897768	0.590697	-0.891199	-0.566258	-0.468671	-0.278454	1.66485	1.78292
Cdk1	1.34309	1.24046	1.42962	1.25378	1.23146	1.22587	0.952167	0.720726	0.878758	0.929184	1.75305		0.567004	0.214488	0.86422	0.26024	0.183574	0.164374	-0.775749	-1.57071	-1.0279	-0.854692	1.97515
Pla2g4b	0.501267	0.361778	0.534238	0.421648	0.469738	0.325949	0.361857	0.363102	0.446137	0.511777	0.717111		0.407306	-0.844282	0.703144	-0.307089	0.124407	-1.16576	-0.843573	-0.832402	-0.087357	0.501609	2.344
Fam174b	0.780669	0.819021	0.728369	0.53503	0.661894	0.623123	0.769397	0.46367	0.633955	0.882434	1.02294		0.380207	0.620736	0.052201	-1.16035	-0.364705	-0.607862	0.309513	-1.60789	-0.539928	1.01844	1.89964
Spc25	34.529	18.2746	34.1549	34.9201	36.4994	11.0217	22.0127	14.6015	25.6551	37.6772	24.6797		0.826142	-0.895592	0.786516	0.867569	1.03486	-1.66385	-0.499637	-1.28466	-0.113818	1.15961	-0.217137
Ppp1r13l	0.340901	0.390553	0.496716	0.372551	0.511135	0.385708	0.934254	0.930957	0.477652	0.529035	0.496451		-0.927429	-0.688045	-0.17621	-0.774837	-0.106693	-0.711404	1.93326	1.91736	-0.268122	-0.0203929	-0.177488
Neto2	3.94976	4.34421	2.90125	4.24749	4.45276	4.37147	4.16134	4.998	3.93892	2.89429	2.81336		0.0467186	0.587985	-1.39205	0.455266	0.736938	0.625392	0.33705	1.48512	0.0318439	-1.4016	-1.51266
Eif3j2	3.17957	3.50256	4.38716	3.39332	4.46937	4.47603	6.24031	6.00087	4.94596	4.36213	3.11272		-1.12409	-0.819097	0.0162037	-0.922249	0.093832	0.100121	1.76608	1.53998	0.543861	-0.0074314	-1.18721
Gm28042	0.469602	0.400912	0.673874	0.572768	0.506075	0.750251	0.525063	0.945376	0.69261	0.419518	0.516884		-0.729069	-1.15045	0.524047	-0.0961924	-0.505324	0.992585	-0.388841	2.18959	0.638984	-1.03631	-0.439015
Gm4532	0.753765	0.227935	0.55469	0.822014	0.484753	0.278705	0.7032	0.504518	0.367848	0.301792	0.362897		1.31607	-1.28261	0.332229	1.65336	-0.0134038	-1.03171	1.06617	0.084276	-0.591155	-0.917608	-0.615623
Sowahc	0.278502	0.368152	0.768553	0.597847	0.443674	0.554355	0.50353	0.682547	0.539121	0.170605	0.542345		-1.25386	-0.735568	1.57926	0.592364	-0.298954	0.340924	0.0470906	1.08204	0.252852	-1.87764	0.271491
Tnfrsf21	0.444053	0.337353	0.287337	0.328699	0.387425	0.465202	0.568257	0.522694	0.40933	0.390831	0.220397		0.466878	-0.580864	-1.072	-0.665842	-0.0891817	0.67455	1.6865	1.23909	0.125915	-0.0557364	-1.72931
Gm3435	1.82594	1.04593	1.53718	3.08574	1.6558	1.45844	2.22823	1.85604	1.25451	0.766758	1.39276		0.288459	-0.962804	-0.174759	2.30938	0.0155271	-0.301071	0.933798	0.336745	-0.628208	-1.41064	-0.406432
Zfp112	0.750906	1.45974	1.02391	0.861997	1.24178	1.43451	0.714545	1.9331	1.14008	0.405874	1.12196		-0.826739	0.857037	-0.178241	-0.562852	0.339291	0.797105	-0.913112	1.98146	0.0977112	-1.64633	0.0546687
Nr1h3	0.175001	0.481945	0.193172	0.683028	0.327987	1.10001	1.08242	2.75714	1.04856	0.982685	0.963102		-0.999063	-0.570447	-0.973689	-0.289656	-0.785434	0.292616	0.268053	2.60663	0.220771	0.128784	0.101438
2810468N07Rik	1.47335	0.737734	0.680104	3.73781	2.10867	1.09449	1.47847	1.38338	0.987737	0.492296	1.02064		0.101841	-0.712324	-0.776107	2.6081	0.804999	-0.317474	0.107507	0.00226377	-0.435626	-0.983969	-0.399209
Hck	0.350719	0.16565	0.408296	0.269001	0.446045	0.498865	0.405256	0.788937	0.413734	0.204501	0.424082		-0.282643	-1.39521	0.0634883	-0.773902	0.290421	0.607955	0.0452129	2.35176	0.0961795	-1.16165	0.158388
Pth1r	0.73833	0.580952	1.39714	1.02918	0.790733	1.10499	0.802946	1.33865	0.631982	0.484593	0.580478		-0.394862	-0.898099	1.71177	0.535169	-0.227297	0.777581	-0.188244	1.52474	-0.734924	-1.20622	-0.899614
Tagln3	5.22992	1.35558	3.05629	1.50091	2.88292	6.44588	2.34196	10.5016	4.25379	2.51274	3.90712		0.464668	-0.99785	-0.355852	-0.942989	-0.421297	0.923678	-0.625503	2.45466	0.0961902	-0.561036	-0.0346737
Hist1h4d	0.133182	0.440134	0.404282	1.59192	1.52886	1.98823	0.760397	0.408	0.429687	0.37393	0.225525		-0.970438	-0.48993	-0.546053	1.3131	1.21438	1.93349	0.0114162	-0.540233	-0.506284	-0.593567	-0.825883
Tubb3	14.2667	13.2014	19.6851	12.3198	14.7063	21.0741	19.6171	34.7148	23.2117	11.3613	17.0318		-0.602705	-0.76229	0.208989	-0.894357	-0.536851	0.417066	0.198802	2.46049	0.737285	-1.03794	-0.188484
Klre1	1.11992	0.345433	0.890074	2.22924	0.62969	0.797818	1.02306	1.17629	0.908468	0.411626	0.720645		0.371555	-1.15995	-0.082954	2.56518	-0.59785	-0.265386	0.180019	0.483024	-0.0465808	-1.02906	-0.417991
Spi1	0.918679	0.31958	0.960701	4.90662	2.1749	1.41832	1.15025	0.719458	0.66856	0.0987306	0.818765		-0.278737	-0.732394	-0.246917	2.74106	0.672515	0.0996075	-0.103384	-0.429594	-0.468135	-0.899629	-0.354395
Fcgr4	0.455	0.501221	0.470856	0.568833	0.81279	0.47667	0.392377	0.584933	0.498063	0.18872	0.325046		-0.155682	0.138013	-0.0549304	0.567629	2.11777	-0.0179874	-0.553597	0.669931	0.117947	-1.84766	-0.981427
Mrgpre	1.56796	1.12471	1.20752	1.70784	1.43517	1.79544	1.59613	2.17031	1.88232	0.856261	1.08057		0.189491	-0.932673	-0.723025	0.543621	-0.14669	0.765396	0.260808	1.71444	0.985348	-1.6123	-1.04442
Chrne	1.53975	0.782844	0.653705	1.38684	0.776947	1.11675	1.6906	2.28074	1.52853	0.967404	0.902543		0.60787	-0.920889	-1.18172	0.29903	-0.932799	-0.246483	0.912549	2.10448	0.585208	-0.548124	-0.679127
Tctex1d2	4.06264	1.97476	3.18481	4.38848	3.70771	2.58924	3.82554	3.96446	2.76717	1.19128	2.37999		0.966706	-1.11741	0.0904576	1.29196	0.612416	-0.504039	0.730033	0.868703	-0.32643	-1.89948	-0.712912
Sdc3	0.338099	0.0775821	0.342113	0.769799	1.05594	1.11979	0.743277	0.443899	0.59901	0.244505	0.357829		-0.644151	-1.42212	-0.632164	0.645018	1.49951	1.69018	0.565816	-0.328205	0.134997	-0.923647	-0.585232
Tlr7	1.87854	0.76938	1.59508	2.77298	1.44442	1.312	1.92508	1.87612	0.932424	0.491776	1.08074		0.645879	-1.07267	0.206683	2.03173	-0.0267513	-0.231924	0.717988	0.642129	-0.820043	-1.50279	-0.590241
Slc11a1	2.75867	1.51945	2.594	1.79452	2.53729	2.62246	3.74318	7.73569	5.79229	2.13846	3.33055		-0.303627	-0.968914	-0.392032	-0.82124	-0.422477	-0.376753	0.224916	2.36833	1.325	-0.636593	0.00339149
Gzma	175.138	128.123	157.873	163.423	241.894	360.669	114.246	378.901	221.275	57.0752	167.346		-0.220262	-0.695994	-0.394962	-0.338803	0.455224	1.65708	-0.836412	1.84156	0.246586	-1.41491	-0.299107
Cpsf4l	0.713745	0.306959	0.21976	0.825503	0.808927	0.67424	1.03465	1.07239	0.563029	0.355729	0.463345		0.258434	-1.1641	-1.46903	0.649252	0.591286	0.120285	1.38064	1.51262	-0.26862	-0.993548	-0.617215
Clec4a1	0.971176	0.493768	0.53601	1.2392	0.980098	0.782638	0.959692	0.882744	0.447617	0.114408	0.569267		0.764166	-0.718663	-0.58746	1.59665	0.791877	0.178567	0.728496	0.489496	-0.862008	-1.89696	-0.484163
Fcer1g	7.68649	4.78587	5.4105	12.935	5.32398	6.53542	8.90434	8.2879	5.03169	3.18456	3.30116		0.421327	-0.599845	-0.379942	2.26908	-0.410402	0.0160891	0.850074	0.633055	-0.513303	-1.16359	-1.12254
Ncf2	0.570883	0.326084	0.490127	0.804613	0.475534	0.332263	0.865159	0.666243	0.721148	0.366982	0.286433		0.166981	-1.03449	-0.22937	1.31413	-0.300993	-1.00417	1.61129	0.635009	0.904483	-0.833767	-1.2291
Slpi	7.45083	2.40428	5.73224	12.4107	6.13587	2.75959	5.94417	10.0129	4.44006	2.45885	3.44098		0.530021	-1.03762	-0.0038358	2.07074	0.121546	-0.92725	0.0619974	1.32589	-0.405234	-1.02067	-0.715585
Cd244	0.298846	0.125411	0.0628338	0.485999	0.466749	0.50689	0.230208	0.672618	0.616545	0.159821	0.253027		-0.260215	-1.09929	-1.40204	0.645232	0.5521	0.746302	-0.592286	1.54809	1.27681	-0.932818	-0.481887
Ptgs1	1.12096	0.460445	1.11152	1.52016	0.943626	0.796166	0.922042	1.33037	0.648004	0.310362	0.450417		0.642875	-1.07659	0.618301	1.68208	0.181235	-0.202636	0.125047	1.18802	-0.588335	-1.46729	-1.1027
Cybb	0.456142	0.245112	0.515788	0.705617	0.291918	0.256416	0.688135	0.623222	0.358941	0.193098	0.207233		0.22227	-0.86182	0.52868	1.50386	-0.621371	-0.80375	1.41405	1.08058	-0.277065	-1.12902	-1.05641
Matk	3.91655	2.81715	3.16356	3.55067	3.70174	4.1669	3.4919	6.66805	4.56517	1.19427	1.98424		0.24838	-0.529422	-0.284345	-0.0104726	0.0964062	0.425497	-0.0520511	2.19501	0.707265	-1.67758	-1.11869
Ifitm2	1.43475	1.05366	1.45175	6.06647	2.91309	2.12936	2.16168	1.2558	1.21234	0.366207	0.607385		-0.282595	-0.525835	-0.271745	2.67371	0.660991	0.160756	0.181385	-0.396815	-0.424554	-0.964619	-0.810681
Cdc20b	0.671361	0.287607	0.452878	0.32754	0.524278	1.44574	0.425901	1.43642	0.893914	0.152319	0.410531		0.0732853	-0.794525	-0.420786	-0.704222	-0.259324	1.82444	-0.481791	1.80337	0.576561	-1.10046	-0.516548
Msc	0.334718	0.221232	0.480317	0.261281	0.501864	0.455857	0.254808	0.732429	0.493671	0.170868	0.11336		-0.167549	-0.785436	0.625181	-0.567385	0.742496	0.492006	-0.602628	1.99783	0.697889	-1.05965	-1.37276
Clec4n	2.90949	0.889582	1.66253	3.86144	1.61668	1.41065	1.56868	2.25383	1.74983	0.644843	0.411525		1.18552	-0.836775	-0.0629151	2.13859	-0.108819	-0.315092	-0.156876	0.529083	0.024488	-1.0818	-1.3154
Rgl1	0.878869	0.347928	0.560856	1.15234	0.411795	0.287727	0.69257	0.985608	0.506341	0.126182	0.279045		0.959195	-0.67011	-0.0166952	1.7984	-0.47412	-0.854849	0.387497	1.28675	-0.183986	-1.35058	-0.881492
Spic	2.95541	1.15523	1.789	4.74423	1.51877	0.799011	2.08655	3.21265	1.36216	0.389339	0.80719		0.823572	-0.571501	-0.0803524	2.20984	-0.289771	-0.847557	0.150238	1.02292	-0.411138	-1.16504	-0.841219
Hebp1	3.00975	1.10516	1.95428	4.43394	1.60378	1.23651	2.24628	2.68602	1.6864	0.662772	0.499665		0.952283	-0.712685	0.029605	2.19729	-0.276798	-0.59786	0.284868	0.669283	-0.204572	-1.09941	-1.242
Hist1h3e	0.380255	0	0	0.55655	0.178169	0.398365	0.542762	1.1649	0.701041	0.388228	0		-0.0327804	-1.10848	-1.10848	0.465938	-0.604459	0.0184508	0.426933	2.18689	0.874687	-0.0102257	-1.10848
Lrg1	0.132052	0.242443	0.340115	0.343598	0.371237	0.415022	0.963371	0.963183	0.568053	0.0449401	0.260879		-0.963516	-0.597012	-0.272736	-0.261172	-0.169409	-0.0240405	1.79651	1.79588	0.48403	-1.25273	-0.535803
