# Supplementary material for: Sepsis leads to lasting changes in phenotype and function of memory CD8 T cells
Source: eLife. 2021 Oct 15;10:e70989. doi: 10.7554/eLife.70989 (PMC8589447; doi:10.7554/eLife.70989)
Supplement: Figure 6—figure supplement 1—source data 1. [file elife-70989-fig6-figsupp1-data1.xlsx]

## Sheet: Figure 6-FS1-source data 1
KAECH_DAY15_EFF_VS_MEMORY_CD8_TCELL_DN											KAECH_DAY15_EFF_VS_MEMORY_CD8_TCELL_UP
	enrichment scores			heat map z-scores								enrichment scores			heat map z-scores
	Rank	Running ES			CLP D31 1	CLP D31 2	SHAM D31 1	SHAM D31 2	SHAM D31 3			Rank	Running ES			CLP D31 1	CLP D31 2	SHAM D31 1	SHAM D31 2	SHAM D31 3
NRCAM	219	0.0178481		POLR2H	1.0456	0.155214	-1.49897	-0.394644	0.692798		IL1B	16	0.0373104		IL1B	-0.966347	-1.01661	0.655476	1.26454	0.0629419
SOX5	334	0.0357376		TMEM126A	0.534297	0.4067	-0.527079	1.05511	-1.46903		ALDH2	25	0.0716197		ALDH2	-1.18153	-0.787851	1.00645	0.984819	-0.0218881
SLC8A1	368	0.0573761		GBE1	1.50821	-0.416353	-0.0679454	-1.2272	0.203289		CMBL	122	0.0887854		CMBL	-0.621877	-1.30788	1.1856	0.703894	0.0402601
SLC10A1	1014	0.0298765		HEXA	0.734962	0.589937	-0.132159	0.495194	-1.68793		CD81	123	0.111804		CD81	-1.04489	-0.75932	1.22292	0.868209	-0.286911
TSPAN6	1085	0.0372106		SOCS3	0.0951744	0.334859	1.38359	-1.30673	-0.506892		RGL1	134	0.133744		RGL1	-1.15543	-0.699436	0.511342	1.38302	-0.0394925
ZFP36	1523	0.0189303		HSD17B10	1.39469	0.566766	-1.01187	-0.11501	-0.834571		CFP	156	0.153879		CFP	-1.06348	-0.877889	0.656915	1.29102	-0.0065698
DNAJB2	1574	0.0241968		RBM17	0.23832	1.34735	-1.40384	0.174181	-0.356009		LY86	170	0.17395		LY86	-0.900587	-0.858509	1.55942	0.10944	0.0902382
FOSB	1601	0.0308193		CXCR3	1.52271	-0.447766	0.402752	-1.07565	-0.402037		HHEX	191	0.192682		HHEX	-0.610658	-1.20643	1.02983	1.02655	-0.23929
PRSS12	1714	0.0317288		GALNT11	1.17619	-0.381306	0.794397	-0.25742	-1.33186		POU3F2	205	0.211519		POU3F2	-1.11969	-0.64593	1.51523	0.0953083	0.155086
VKORC1	1783	0.0350048		GLO1	1.10712	0.372616	0.228978	-0.104976	-1.60374		PLXNB2	214	0.230319		PLXNB2	-1.35805	-0.504974	0.658707	1.2111	-0.0067807
RABAC1	1887	0.0356861		NOP56	0.808771	1.08651	-1.23381	-0.791351	0.12988		HSPA2	290	0.24223		HSPA2	-0.80742	-1.07418	-0.123204	1.29345	0.711351
RAB3D	2195	0.0228268		ELOVL5	0.938876	1.22519	-0.652996	-0.598474	-0.9126		PRR5	296	0.258291		PRR5	-1.11123	-0.546683	-0.0661532	1.56051	0.163558
SLC12A7	2599	0.00308921		PWP1	0.0309294	0.898995	-1.6988	0.316139	0.45274		SLPI	306	0.273844		SLPI	-0.946169	-0.608896	0.226524	1.613	-0.284461
CSAD	2711	0.00104701		HSD17B11	1.71155	-0.671672	-0.761405	-0.117622	-0.160853		TNFRSF8	310	0.289548		TNFRSF8	-0.800003	-0.73164	-0.344916	1.62566	0.250895
FAM189B	2858	-0.0034486		SATB1	1.547	-0.359626	0.420065	-0.871095	-0.736343		TCF4	314	0.305134		TCF4	-1.0526	-1.12965	0.728725	0.607359	0.846166
KLF4	3067	-0.0120908		MRPL23	1.26944	0.285288	-1.39521	-0.496781	0.337263		SYK	329	0.319571		SYK	-1.45049	-0.340661	1.19616	0.590933	0.0040635
XDH	3146	-0.0128882		IGBP1	0.992272	0.689723	-1.49509	-0.472204	0.285303		CD4	342	0.333686		CD4	-0.936577	-0.700979	0.922744	1.23048	-0.515669
LYST	3359	-0.0222301		ITK	0.0964232	1.42004	-0.716677	-1.15512	0.355337		CD244	351	0.347883		CD244	-0.948072	-0.552372	-0.659019	1.2024	0.957063
SBF2	3525	-0.0289596		YES1	1.07786	-0.297749	0.101767	-1.52499	0.643113		EMP1	360	0.361902		EMP1	-1.07361	-0.786789	0.0601397	1.44979	0.35047
JUND	3564	-0.0279588		CDK4	0.757985	1.21103	-0.16477	-0.512207	-1.29204		FCGR2B	382	0.37469		FCGR2B	-0.843072	-1.22598	0.464865	1.17853	0.425653
SRRM2	3581	-0.0256233		PPIE	1.55925	-0.0778119	-1.22201	-0.263332	0.00390229		CXXC5	431	0.384815		CXXC5	-0.657656	-1.4317	0.577228	0.612444	0.899687
MKRN1	3582	-0.0223089		HYOU1	-0.00313	1.54875	0.083254	-0.448512	-1.18036		EBF1	510	0.391982		EBF1	-0.128284	-1.443	0.986446	-0.322889	0.907726
HSPA1B	3667	-0.0242994		RPS5	1.52271	-0.198392	-1.25632	-0.209117	0.141125		IRF5	535	0.402062		IRF5	-1.50584	-0.372867	0.135065	0.705944	1.0377
UBL4A	3820	-0.0306559		RPL14	1.6282	-0.272608	-1.11496	-0.0846766	-0.155956		ZC3H12C	553	0.412229		ZC3H12C	-0.823422	-0.49229	-0.353938	-0.0484907	1.71814
KCNN4	3952	-0.0359134		KLK8	1.23132	0.165609	-1.43006	0.469783	-0.436653		EGR2	606	0.41964		EGR2	-0.604974	-0.726167	-0.314254	-0.0867713	1.73217
PHYH	3998	-0.0359545		SESN1	1.62899	-0.305825	0.171362	-0.978228	-0.5163		KLRG1	626	0.428885		KLRG1	-1.29564	-0.129354	-0.200274	1.49956	0.125715
SLC11A2	4077	-0.038108		GALK1	0.296475	1.38496	0.229497	-1.19575	-0.715182		BLK	675	0.436009		BLK	-0.629138	-0.449137	1.77352	-0.259839	-0.435404
CMTM7	4240	-0.0456124		IFRD2	0.369793	1.16393	-1.24743	-0.818222	0.531929		LAMC1	710	0.443602		LAMC1	-0.845246	-0.353553	-0.214772	-0.321645	1.73522
NGDN	4284	-0.0458628		DDX21	0.222893	-1.11653	-0.498675	1.55805	-0.165735		MED12L	746	0.450848		MED12L	-1.53357	-0.185988	0.664353	1.08234	-0.0271325
STIM1	4380	-0.049403		SPRED2	-0.333595	1.60247	0.299411	-0.757601	-0.810682		MFHAS1	775	0.45817		MFHAS1	-1.39469	-0.483967	-0.0127023	1.07184	0.819517
WDR92	4419	-0.0494848		GTF2H4	0.955944	0.681214	0.275207	-1.55527	-0.357096		GZMA	779	0.466911		GZMA	-1.06151	-0.156491	-0.601578	1.55453	0.265047
HSD17B8	4539	-0.0546606		GART	1.1763	0.886942	-0.51459	-1.20193	-0.346716		ADAM8	796	0.474699		ADAM8	-1.42023	-0.0854501	-0.0523812	1.39511	0.162949
GATA3	4654	-0.0596572		TTC27	0.446202	1.00457	0.695227	-1.01941	-1.12659		LAT2	799	0.483341		LAT2	-0.158252	-1.0771	-0.724329	1.40995	0.54973
DYM	4845	-0.069516		DUSP1	-0.0187091	0.696484	1.04464	-1.54675	-0.175662		MTM1	878	0.486814		MTM1	-1.18782	-0.918774	1.0953	0.375491	0.635807
GOSR1	4991	-0.0767731		KARS1	0.199419	1.50399	-0.458863	-0.0250851	-1.21946		RYR1	892	0.494131		RYR1	-1.25648	-0.0768045	1.54636	-0.133232	-0.0798515
ELL	5038	-0.0779942		GALNT10	0.888279	0.813177	0.200585	-0.359165	-1.54288		ALCAM	903	0.501569		ALCAM	-1.21314	-0.74104	0.0775318	1.2641	0.612548
ITPKB	5090	-0.0795636		RPS3	1.56455	0.00835585	-1.21493	-0.25643	-0.101549		LYL1	908	0.509299		LYL1	-1.41303	0.16849	0.78595	1.02053	-0.561937
KLF6	5135	-0.0807393		RRP1B	0.475975	1.31296	-0.264033	-1.40167	-0.123233		BATF3	939	0.515236		BATF3	-1.08514	0.00062952	0.370548	1.45932	-0.745352
LDAH	5564	-0.105857		LDHA	0.0253879	1.69736	-0.865172	-0.396357	-0.461214		CD180	985	0.519987		CD180	-0.199862	-0.773267	1.73945	-0.236898	-0.529427
SMAD7	5652	-0.11013		PRDX6	0.7539	1.14256	-0.146519	-0.339443	-1.4105		GPD2	990	0.527217		GPD2	-1.50855	-0.348313	0.190315	1.13163	0.534924
RNF38	5653	-0.109064		RPS6	1.52515	0.288808	-1.07888	-0.647132	-0.0879494		MYADM	1041	0.531364		MYADM	-1.00599	-0.340823	-0.695226	1.41058	0.631463
MOGS	5759	-0.114525		LYSMD2	0.704943	0.468215	0.861826	-1.50252	-0.532462		CCDC28B	1061	0.537321		CCDC28B	-0.69455	-0.489777	-0.881579	1.46106	0.604842
C2CD3	5803	-0.116209		LCP1	0.276031	1.60676	-0.773668	-0.80803	-0.301092		CD74	1088	0.542788		CD74	-1.64117	0.433947	0.782115	0.668727	-0.243618
ARL6	5834	-0.117119		LARP1	-0.845246	-0.353553	-0.214772	-0.321645	1.73522		IFITM3	1128	0.547226		IFITM3	-1.60405	0.458096	0.715865	0.768314	-0.338221
USP3	5904	-0.120479		EOMES	0.272904	0.747746	-0.164076	-1.64743	0.790855		LMO2	1143	0.553111		LMO2	0.502091	-1.75611	0.439197	0.143675	0.671148
GPR65	5933	-0.12135		RPL10	1.5032	0.421402	-1.10867	-0.427789	-0.388144		IL18RAP	1154	0.559181		IL18RAP	-1.18479	-0.365092	0.819549	1.23827	-0.507941
STAM2	6001	-0.124678		PSMB9	0.103685	1.58518	-0.0079686	-1.01891	-0.661983		ITGAV	1197	0.563088		ITGAV	-0.738745	-1.37797	0.758642	0.509109	0.848961
TTC7B	6084	-0.128993		USP18	-0.150712	1.32582	0.0813273	-1.47189	0.215447		CD19	1199	0.569505		CD19	-1.31695	0.256777	0.433562	1.26604	-0.639432
UFD1	6313	-0.142427		BANF1	-1.08514	0.00062952	0.370548	1.45932	-0.745352		NAPSA	1300	0.569405		NAPSA	-0.719809	-0.230359	1.60465	0.238316	-0.892803
ACTN1	6378	-0.145851		PSMB10	0.263743	1.47052	0.0850543	-1.1397	-0.679618		APOBEC1	1403	0.568806		APOBEC1	-0.221015	-1.06279	1.65487	-0.269831	-0.101232
ATP13A1	6432	-0.148649		SMAD1	1.35921	0.359414	0.0342916	-1.36933	-0.383582		BLNK	1412	0.573927		BLNK	-1.21731	0.28511	1.38791	-0.678815	0.223101
HPCAL1	6795	-0.170715		SPRYD7	1.30845	0.661763	-0.0492849	-0.924317	-0.996612		ENPP1	1457	0.576671		ENPP1	0.162725	-1.66363	1.05004	0.196854	0.254006
ABHD14A	6846	-0.173695		RPSA	1.59857	0.285677	-0.935306	-0.612183	-0.336757		FANCM	1480	0.580662		FANCM	-1.28723	-0.57898	0.217657	0.27583	1.37272
PATJ	6859	-0.174351		PHPT1	1.58072	0.394551	-0.620413	-0.823914	-0.530946		LITAF	1493	0.585224		LITAF	-1.71586	0.156497	0.154076	0.602254	0.803037
PIGX	6871	-0.17496		SSBP2	1.26904	0.146927	-0.999326	-1.0091	0.592463		CD86	1560	0.586289		CD86	-1.37767	-0.742244	0.73614	0.530983	0.852791
AASS	7197	-0.194909		F2R	-0.393241	1.756	-0.707402	-0.480396	-0.174965		PIAS3	1584	0.589908		PIAS3	-0.730487	-1.13918	-0.121308	1.2887	0.702273
MEOX2	7751	-0.228852		MYH11	-0.321124	1.24462	-0.886431	0.865025	-0.902092		S100A8	1591	0.594545		S100A8	-0.551041	-0.101515	-0.551041	1.75464	-0.551041
FOXN1	7828	-0.233517		PSME1	0.290617	1.60929	-0.362922	-0.848636	-0.68835		FAM8A1	1644	0.596225		FAM8A1	-0.953108	-0.459046	-0.642186	1.45043	0.603908
AFM	9740	-0.350814		FBL	1.15081	0.904569	-1.21979	-0.518822	-0.31677		MXD4	1667	0.599703		MXD4	-0.922053	-0.276113	-0.585656	0.137067	1.64675
EVL	9898	-0.360396		CCR7	1.51904	-0.221166	0.37726	-1.05919	-0.615947		DENND5A	1749	0.599364		DENND5A	0.222893	-1.11653	-0.498675	1.55805	-0.165735
SRPK1	9920	-0.361613		PIM2	-0.461495	1.44715	0.569445	-1.05981	-0.495291		CXCR5	1774	0.602457		CXCR5	-0.49743	-0.290645	0.410001	-1.12026	1.49833
STX18	9953	-0.363474		RHBDL3	0.742418	0.309127	-1.41465	-0.620346	0.983455		SORBS1	1830	0.603479		SORBS1	-0.0576169	-1.62249	0.0867355	1.00559	0.587782
SCARB2	10043	-0.368746		HSP90AB1	0.311091	1.42146	-1.21465	-0.628526	0.110622		ANXA1	1851	0.606595		ANXA1	-0.369275	-0.766776	-0.809181	1.57634	0.368895
LUC7L	10165	-0.375858		GZMM	1.01654	1.06866	-0.937743	-0.952499	-0.194952		RORA	1991	0.602089
PTPRG	10201	-0.37765		TNFAIP8L1	1.21541	0.792024	-0.719866	-0.120164	-1.1674		DOCK5	2202	0.592838
ITGB7	10260	-0.380781		HSPE1	0.796499	1.28653	-0.732639	-1.03706	-0.313328		GALNT3	2212	0.595901
EGR1	10270	-0.380896		CTNNA1	1.01907	1.15558	-0.748369	-0.556727	-0.869556		AHNAK	2275	0.595612
NFKBIA	10298	-0.382091		TLR6	-0.355687	1.58872	0.30652	-0.957376	-0.582177		CD40	2317	0.596535
NR2C1	10322	-0.38301		TDRP	1.42696	0.365693	-0.252854	-1.30871	-0.231081		KLRD1	2323	0.599658
MAP2	10430	-0.388974		SELL	0.682516	0.699682	0.693057	-1.49092	-0.584338		LGALS3	2484	0.593044
MCCC1	10651	-0.401647		RFLNB	0.179245	0.566794	0.647234	0.365696	-1.75897		TBR1	2488	0.596061
COX16	10662	-0.401422		GSTK1	0.227837	1.20022	-0.287316	0.371532	-1.51227		KMT2E	2555	0.595114
UBAP1	10701	-0.402871		EYA2	1.37516	0.420136	0.153681	-0.905329	-1.04364		FAM89B	2560	0.597963
LMO4	10716	-0.402836		MRM3	1.07423	-1.2381	0.840828	0.0957016	-0.772654		CREBRF	2584	0.599608
CD247	10724	-0.402361		NSG2	1.63934	0.00884915	-0.144643	-1.03571	-0.467842		CCDC93	2680	0.596723
LAMP1	10727	-0.401578		SMYD2	0.701223	1.19663	-0.78959	-1.20174	0.0934805		CARHSP1	3203	0.567069
TCF7	10906	-0.411431		AQP9	1.23479	0.782931	-0.802021	-1.09781	-0.117895		IL4I1	3225	0.568125
GRK6	10907	-0.410357		GSTO1	1.51743	0.21775	-1.21176	-0.11231	-0.411114		KMT2A	3494	0.553779
ACP5	11043	-0.417435		RGS10	1.59664	0.1187	-0.0630038	-1.00997	-0.642371		CTSA	3549	0.552507
PPP1R15A	11050	-0.41659		BCL2	0.900714	1.19034	-1.15186	-0.514146	-0.425051		TTC14	3570	0.553305
ANXA5	11081	-0.417189		MYC	1.04032	0.988015	-0.802971	-1.13519	-0.0901696		HK2	3797	0.541264
CD7	11098	-0.416913		BMP7	1.4025	0.122146	-1.11864	-0.787945	0.381939		PABPN1	3853	0.539667
TNIP1	11215	-0.422659		SOCS1	0.186182	1.64633	-0.853374	-0.643417	-0.335719		MYL4	3988	0.53311
TOB1	11272	-0.424635		APEX1	0.991435	1.07189	-1.06488	-0.842504	-0.155945		SVIL	4057	0.530557
HDAC7	11288	-0.424079									CD9	4078	0.530931
IL7R	11365	-0.427193									ZPBP	4122	0.529861
IL6R	11546	-0.436509									AK3	4154	0.529505
TSPAN31	11586	-0.437128									KCNA4	4254	0.524904
CCT6A	11594	-0.435779									PPL	4274	0.525199
PYCR2	11607	-0.434721									AMFR	4329	0.523308
IKBKB	11690	-0.437862									CLCC1	4411	0.519712
NUDT3	11697	-0.436323									SWAP70	4482	0.516742
TNF	11737	-0.436762									CHD7	4815	0.497491
CD8A	11779	-0.437269									FADS1	4892	0.49389
SHISA5	11789	-0.435801									JARID2	4942	0.491919
ABLIM1	11795	-0.43408									ADCY6	5049	0.486386
FAAH	11911	-0.438974									RNF14	5238	0.475724
UBALD2	11986	-0.441255									TWSG1	5463	0.462733
PRSS23	12116	-0.446772									RBX1	5701	0.448815
HM13	12153	-0.446571									WASF2	5848	0.440414
TBCEL	12154	-0.444158									MYB	5852	0.440785
PGM1	12221	-0.445728									ACTB	5913	0.437631
FAM102A	12283	-0.446896									CD47	5972	0.434563
WDR83OS	12394	-0.450954									RSU1	6030	0.431529
MAP3K5	12506	-0.454916									MECR	6636	0.394588
CNDP2	12651	-0.460726									LAPTM5	6655	0.393649
CRTAM	12849	-0.469549									HS2ST1	6713	0.390289
IFNAR2	12855	-0.466575									PHF13	6721	0.389994
PSMD6	12954	-0.46917									HS3ST1	7058	0.369381
PCBP1	12965	-0.466352									MTNR1A	7084	0.367847
POLR2H	13096	-0.470739									CUZD1	7768	0.325945
TMEM126A	13138	-0.469601									DSPP	7865	0.320056
GBE1	13154	-0.466832									FOXA3	7867	0.319994
HEXA	13199	-0.465782									RGS5	8934	0.254595
SOCS3	13234	-0.464054									GJA3	9150	0.241405
HSD17B10	13373	-0.468494									CCL1	9682	0.208829
RBM17	13429	-0.467755									CCR6	9699	0.207847
CXCR3	13456	-0.465211									EEA1	9908	0.195126
GALNT11	13490	-0.463034									MAD2L1BP	9925	0.194189
GLO1	13496	-0.459135									VMP1	9955	0.192476
NOP56	13522	-0.456434									ENTPD6	10173	0.179361
ELOVL5	13549	-0.453727									ANXA7	10282	0.173006
PWP1	13574	-0.450856									ADCK1	10316	0.171277
HSD17B11	13586	-0.447161									GABARAPL1	10317	0.171573
SATB1	13617	-0.444576									GNAI2	10538	0.158512
MRPL23	13658	-0.44254									WNK2	10589	0.155914
IGBP1	13691	-0.439988									CCR2	10593	0.156202
ITK	13721	-0.437204									MTMR1	10653	0.153088
YES1	13740	-0.433708									MAN2A1	10979	0.133846
CDK4	13778	-0.431304									LXN	11046	0.130533
PPIE	13828	-0.429528									PSMD8	11093	0.128472
HYOU1	13876	-0.427534									RECQL	11343	0.114129
RPS5	13906	-0.424383									IDH3A	11402	0.111536
RPL14	13934	-0.421042									RPS6KB1	11567	0.102546
KLK8	13990	-0.419322									TBCE	11659	0.0980981
SESN1	14069	-0.418818									C1QTNF12	11667	0.0988061
GALK1	14074	-0.413763									KPNA2	11835	0.08982
IFRD2	14184	-0.414913									KRTCAP2	11848	0.0903514
DDX21	14228	-0.411865									CASP3	11984	0.0834424
SPRED2	14250	-0.407403									PRKCB	12211	0.0710819
GTF2H4	14281	-0.40341									CXCR2	12281	0.06841
GART	14289	-0.397998									PPP3CA	12287	0.0696727
TTC27	14342	-0.395185									ARPP19	12320	0.0693129
DUSP1	14360	-0.390168									PTGER3	12351	0.0690901
KARS1	14463	-0.390132									TNXB	12354	0.0705852
GALNT10	14471	-0.38424									GMFG	12489	0.0640831
RPS3	14477	-0.378206									KIF22	12719	0.0519082
RRP1B	14565	-0.37698									IL1RN	12742	0.0524553
LDHA	14582	-0.371354									TIMM10	12953	0.0416524
PRDX6	14632	-0.367588									P3H4	13025	0.0394351
RPS6	14716	-0.365624									IMPA1	13279	0.0262673
LYSMD2	14717	-0.358565									LACTB2	13384	0.022351
LCP1	14732	-0.352298									ENTPD1	13395	0.0242139
LARP1	14765	-0.347051									SLC4A1	13469	0.0222705
EOMES	14775	-0.340346									RALY	13701	0.0108573
RPL10	14803	-0.334623									SMC4	13703	0.0135547
PSMB9	14821	-0.328233									CDKN1A	13709	0.0160116
USP18	14824	-0.320908									GOLGA7	13730	0.0175725
BANF1	14890	-0.317246									ID2	13782	0.0172935
PSMB10	14934	-0.31208									MRPS24	13932	0.0111853
SMAD1	14938	-0.304451									MRPS15	13985	0.0110887
SPRYD7	14943	-0.296842									ANXA4	13997	0.0135273
RPSA	14947	-0.289158									MEMO1	14018	0.0154498
PHPT1	15162	-0.293543									MBD4	14052	0.0166279
SSBP2	15166	-0.284968									ANXA2	14099	0.0170587
F2R	15192	-0.277628									POU2AF1	14152	0.0171866
MYH11	15220	-0.270232									CD38	14303	0.0115657
PSME1	15226	-0.261467									CLPS	14660	-0.0060915
FBL	15287	-0.255737									ENTPD2	14762	-0.0079082
CCR7	15288	-0.246307									HDC	14857	-0.0090701
PIM2	15291	-0.23699									CD22	14872	-0.0052942
RHBDL3	15302	-0.228085									IRF8	14873	-0.000658
HSP90AB1	15349	-0.221061									RHD	14984	-0.0025507
GZMM	15356	-0.211544									CMC2	15077	-0.0031175
TNFAIP8L1	15400	-0.204005									GZMB	15109	0.000148
HSPE1	15456	-0.19678									PAM16	15163	0.00222123
CTNNA1	15476	-0.187241									CD79B	15205	0.00515027
TLR6	15582	-0.182255									RPL30	15250	0.00805304
TDRP	15658	-0.174829									VPREB3	15300	0.0108296
SELL	15672	-0.163513									RECQL5	15398	0.0110627
RFLNB	15693	-0.152469									AHRR	15464	0.0135511
GSTK1	15756	-0.143226									AURKB	15733	0.00487429
EYA2	15761	-0.130406									HP	15767	0.0108274
MRM3	15769	-0.117719									CHEK2	15896	0.0118444
NSG2	15790	-0.105569									IGF1R	16083	0.0111333
SMYD2	15846	-0.0949348									CDCA8	16288	0.012086
AQP9	15852	-0.0811724
GSTO1	15860	-0.0674457
RGS10	15916	-0.0558384
BCL2	15919	-0.0409394
MYC	16115	-0.0348948
BMP7	16161	-0.0188934
SOCS1	16166	-0.000251
APEX1	16201	0.0174321
