# Supplementary material for: Sepsis leads to lasting changes in phenotype and function of memory CD8 T cells
Source: eLife. 2021 Oct 15;10:e70989. doi: 10.7554/eLife.70989 (PMC8589447; doi:10.7554/eLife.70989)
Supplement: Figure 6—source data 1. [file elife-70989-fig6-data1.xlsx]

## Sheet: Figure 6-source data 1
KEGG_RIBOSOME											KEGG_CAMS
	enrichment scores			heat map z-scores								enrichment scores			heat map z-scores
	Rank	Running ES			SHAM D31 1	SHAM D31 2	SHAM D31 3	CLP D31 1	CLP D31 2			Rank	Running ES			SHAM D31 1	SHAM D31 2	SHAM D31 3	CLP D31 1	CLP D31 2
RPS29	5020	-0.3026		RPL18A	-1.00031	-0.244947	0.531886	1.45259	-0.739224		F11R	3	0.0809		F11R	0.3197	0.493645	1.24144	-0.996691	-1.05809
RPL3L	7871	-0.4765		RPS25	-1.48909	0.562605	-0.228652	1.18856	-0.0334275		VCAM1	33	0.1361		VCAM1	0.912545	1.10794	-0.0553524	-1.03637	-0.928759
RPL10L	8033	-0.4863		RPS16	-1.13956	0.128553	0.33112	1.42256	-0.742673		ITGA9	70	0.1794		ITGA9	1.15797	0.9536	-0.284855	-0.921949	-0.904771
FAU	10189	-0.617		RPS13	-0.692842	-0.317945	0.00190932	1.71066	-0.701787		CADM1	139	0.2137		CADM1	0.559706	1.30261	0.0373261	-1.25332	-0.646318
RPS21	10722	-0.6474		RPLP2	-1.32421	0.454942	0.136458	1.30245	-0.569644		CADM3	141	0.252		CADM3	1.0371	0.951696	-0.0866344	-0.633203	-1.26896
RPL22L1	10855	-0.6531		RPL8	-1.37818	0.344527	0.096218	1.34429	-0.406852		PTPRM	208	0.2815		PTPRM	0.778233	1.33958	-0.442948	-0.814276	-0.860593
RPS28	11853	-0.7092		RPS23	-1.05588	-0.266531	0.377677	1.52716	-0.582421		NRCAM	217	0.314		NRCAM	-0.323876	0.956633	1.1524	-0.721464	-1.06369
RPL37A	12078	-0.7175		MRPL13	-0.925347	-0.569219	0.234291	-0.362506	1.62278		ESAM	245	0.3432		ESAM	0.885354	-0.527777	1.26031	-0.666727	-0.951157
RPL38	12163	-0.7171		UBA52	-1.32435	0.309516	-0.0539216	1.42215	-0.353391		SDC3	278	0.3703		SDC3	0.87948	1.00168	-0.051473	-1.43764	-0.392041
RPS27	12221	-0.7149		RPL36	-1.64173	0.106092	0.583041	0.97621	-0.0236171		CD4	339	0.3923		CD4	0.928575	1.22343	-0.499621	-0.940541	-0.711845
RPL34	12259	-0.7114		RPL27	-0.706451	-1.09789	0.1782	1.49923	0.126909		CD80	397	0.4126		CD80	-0.381814	1.0981	1.03051	-0.699049	-1.04775
RPL18A	12585	-0.7245		RPL18	-1.15726	-0.346802	0.255239	1.54516	-0.296342		MPZL1	424	0.4337		MPZL1	0.92448	1.24683	-0.819279	-0.623298	-0.728728
RPS25	12591	-0.7181		RPL11	-1.62134	0.0910823	-0.0871753	0.962554	0.654876		SDC1	621	0.4398		SDC1	1.60551	0.139356	-0.398563	-0.262176	-1.08413
RPS16	12621	-0.7131		RPS10	-1.27114	-0.0281808	0.298988	1.44718	-0.446845		ITGAM	680	0.4535		ITGAM	0.030898	1.56541	-0.211056	-1.21441	-0.170838
RPS13	12697	-0.7107		RPL19	-1.49954	0.0931503	0.250386	1.28928	-0.133269		NCAM2	870	0.4563		NCAM2	0.0582386	1.26386	-0.0125286	0.223176	-1.53274
RPLP2	12788	-0.709		RPL13A	-1.32092	-0.380464	0.585492	1.31459	-0.198697		ALCAM	901	0.4684		ALCAM	0.103851	1.2379	0.635121	-1.21139	-0.765485
RPL8	12950	-0.711		RPS15	-1.37953	-0.103573	0.259945	1.40861	-0.185451		MAG	951	0.4787		MAG	1.6312	-0.534878	0.00534467	-1.02319	-0.0784766
RPS23	12955	-0.7035		RPL41	-1.70137	0.546762	0.00981901	0.297588	0.847198		JAM3	1081	0.4831		JAM3	1.59103	-0.653031	0.108104	-0.0314502	-1.01465
MRPL13	12993	-0.6979		RPL29	-1.09443	-0.592176	0.11416	1.56154	0.0109119		CNTNAP1	1184	0.4882		CNTNAP1	1.34367	0.686578	-1.04003	-0.77008	-0.220137
UBA52	13094	-0.6958		RPL21	-1.4847	-0.0226621	0.350157	1.28676	-0.129557		ITGAV	1195	0.4988		ITGAV	0.761638	0.495926	0.860315	-0.749813	-1.36807
RPL36	13140	-0.6902		RPS5	-1.24712	-0.19347	0.225598	1.50701	-0.292022		L1CAM	1285	0.5039		L1CAM	0.428489	1.53403	-0.387742	-0.978262	-0.59651
RPL27	13169	-0.6835		RPL14	-1.10392	-0.0640563	-0.0837386	1.62257	-0.370856		CTLA4	1333	0.5113		CTLA4	1.70923	-0.0161842	-0.850308	-0.430194	-0.412541
RPL18	13201	-0.6769		RPL5	-1.07305	-0.144957	0.154027	1.58977	-0.525789		CLDN15	1347	0.5206		CLDN15	-0.374199	-0.557157	1.76489	-0.207796	-0.625735
RPL11	13282	-0.6729		RPLP1	-1.18093	-0.259907	0.0955337	1.57371	-0.228413		JAM2	1500	0.5205		JAM2	1.25258	0.616812	-1.03075	-0.983455	0.144815
RPS10	13354	-0.6682		RPS9	-1.00984	-0.736586	0.168509	1.55197	0.0259509		SIGLEC1	1525	0.528		SIGLEC1	1.05803	0.807055	-1.00205	-1.08448	0.221445
RPL19	13372	-0.6601		RPL12	-0.798338	-0.407386	0.199936	1.65418	-0.64839		CD86	1558	0.5349		CD86	0.743019	0.515249	0.868524	-1.35191	-0.77488
RPL13A	13465	-0.6562		RPL26	-1.3811	1.17078	-0.344605	0.751343	-0.196417		CD40LG	1615	0.54		CD40LG	0.0471503	1.29332	0.00524177	0.169646	-1.51535
RPS15	13466	-0.6468		RPS27A	-1.09368	-0.362126	0.0416178	1.62116	-0.206967		PVR	1806	0.5361		PVR	-0.129343	1.677	-0.037808	-0.633104	-0.876747
RPL41	13469	-0.6375		RPS24	-1.15129	-0.0035796	0.0387337	1.57052	-0.454387		ICAM2	2222	0.517		ICAM2	1.19775	0.662676	-0.428033	-0.0390063	-1.39339
RPL29	13474	-0.6282		RPL36AL	-1.60566	0.187043	-0.154903	1.03666	0.536863		ITGB1	2238	0.5223		ITGB1	0.349677	1.60766	-0.565477	-0.744617	-0.647246
RPL21	13838	-0.6394		RPL39	-1.39995	-0.0870039	0.109158	1.42084	-0.0430466		CLDN10	2274	0.5262		CLDN10	1.52821	-1.21882	0.203611	-0.201619	-0.311377
RPS5	13897	-0.6318		RPL17	-0.927249	-0.651528	0.2129	1.61503	-0.249152		CD40	2313	0.5299		CD40	1.56678	-0.357712	-0.616491	-0.952647	0.360072
RPL14	13925	-0.6222		RPL23	-1.13042	-0.534223	0.276565	1.52977	-0.141685		NLGN3	2346	0.5338		NLGN3	0.414567	1.04915	-0.792739	-1.30344	0.632463
RPL5	13927	-0.6109		RPS7	-0.49312	-0.886753	-0.147992	1.70771	-0.17984		NRXN2	2359	0.5389		NRXN2	1.035	0.839737	-1.39452	-0.52613	0.0459107
RPLP1	13976	-0.6023		RPS17	-1.64804	0.216748	-0.124695	0.851724	0.704267		SDC4	2474	0.5375		SDC4	-0.0147721	0.0316915	0.600518	-1.62164	1.00421
RPS9	14032	-0.5938		RPL31	-1.58661	-0.199095	0.0923118	0.827909	0.865486		NLGN2	2555	0.5379		NLGN2	0.139826	1.42089	-0.950666	-0.965205	0.355155
RPL12	14056	-0.5832		RPL35	-1.65043	-0.0584276	0.145673	0.903428	0.659753		SPN	2588	0.5413		SPN	-0.599472	1.47123	0.474467	-1.08834	-0.257891
RPL26	14143	-0.5761		RPL4	-1.16394	-0.517361	-0.027924	1.5314	0.177832		CD6	2627	0.5441		CD6	-0.368312	0.392446	1.51474	-0.428992	-1.10989
RPS27A	14170	-0.5652		RPL9	-1.03194	-0.618663	-0.0810125	1.58919	0.142426		NECTIN2	2803	0.5382
RPS24	14174	-0.5528		RPL35A	-1.71947	0.279157	0.347773	0.898214	0.194325		ITGA4	3398	0.5057
RPL36AL	14179	-0.5405		RPL27A	-0.980435	-0.748445	0.343554	1.52962	-0.144291		CLDN7	3954	0.4748
RPL39	14192	-0.5285		RPL7A	-1.33749	-0.543434	0.0814005	1.28058	0.518939		CLDN5	4081	0.4698
RPL17	14202	-0.5163		RPL7	-1.2856	-0.527689	0.107021	1.4016	0.304669		CLDN4	4772	0.4296
RPL23	14223	-0.5046		RPS3	-1.21632	-0.245408	-0.0331947	1.56656	-0.0716307		CD2	5295	0.3992
RPS7	14237	-0.4924		RPS19	-1.27596	-0.0669272	-0.238804	1.5187	0.062982		CNTN1	5452	0.391
RPS17	14274	-0.4814		RPL37	-1.1979	-0.918069	0.367004	1.04488	0.704081		CD276	5509	0.3888
RPL31	14296	-0.4693		RPL32	-1.38288	-0.448756	0.0357195	1.26695	0.528973		CLDN23	5620	0.3832
RPL35	14342	-0.4584		RPS8	-1.27591	-0.338352	-0.0260618	1.49528	0.145037		NEO1	5700	0.3795
RPL4	14344	-0.4448		RPS20	-1.43091	-0.332844	-0.027218	1.23986	0.551108		CDH5	5741	0.3781
RPL9	14350	-0.4314		RPS18	-0.996705	-0.620723	0.00664241	1.619	-0.0082174		NEGR1	5874	0.371
RPL35A	14380	-0.4193		RPL36A	-1.36371	-0.362182	0.277001	1.3888	0.0600885		CD274	6106	0.3576
RPL27A	14389	-0.4058		RPS4X	-1.25929	-0.402055	0.122903	1.49518	0.0432569		ITGAL	6189	0.3533
RPL7A	14442	-0.3948		RPL22	-1.12856	-0.415735	-0.223267	1.5699	0.197662		ITGB2	6270	0.349
RPL7	14448	-0.3809		RPL6	-1.01066	-0.611966	-0.222075	1.57553	0.26917		NRXN3	6508	0.3349
RPS3	14466	-0.3676		RPL13	-0.958765	-0.5345	-0.174547	1.6627	0.00510718		ITGA8	6586	0.3305
RPS19	14486	-0.3542		RPL24	-1.32103	-0.568971	-0.0624483	0.873264	1.07919		CD28	6714	0.323
RPL37	14501	-0.3405		RPS12	-1.28635	-0.410302	0.125564	1.46636	0.104727		NFASC	6739	0.3218
RPL32	14514	-0.3266		RPS6	-1.079	-0.657786	-0.0162488	1.53464	0.218392		CNTNAP2	7162	0.296
RPS8	14532	-0.3128		RPS15A	-1.17377	-0.387397	0.123408	1.5625	-0.124739		NLGN1	7244	0.291
RPS20	14538	-0.2983		RPL15	-1.37579	-0.42128	-0.154506	1.00362	0.947953		CLDN22	8815	0.1951
RPS18	14552	-0.2843		RPL3	-0.76593	-0.967565	-0.168894	1.51648	0.385906		CLDN14	8819	0.1949
RPL36A	14599	-0.2719		RPL10	-1.11868	-0.4296	-0.335072	1.52401	0.359346		CLDN19	8820	0.1949
RPS4X	14605	-0.257		RSL24D1	-0.731999	-0.785342	-0.594851	0.693541	1.41865		CLDN18	8821	0.1949
RPL22	14620	-0.2425		RPL10A	-0.840483	-0.899109	-0.279321	1.43909	0.579826		CLDN17	8822	0.1949
RPL6	14626	-0.2274		RPL28	-1.28671	-0.3862	-0.136459	0.385213	1.42416		CLDN16	8823	0.1949
RPL13	14627	-0.2121		RPS11	-1.03853	-0.949007	-0.0225163	0.996188	1.01387		CLDN2	8861	0.1927
RPL24	14671	-0.199		RPS26	-1.24723	-0.414606	-0.395341	1.01806	1.03912		CLDN6	8863	0.1926
RPS12	14688	-0.1842		RPLP0	-0.90968	-0.658343	-0.34412	1.58556	0.326586		CLDN3	8864	0.1926
RPS6	14705	-0.1692		RPL23A	-0.768449	-1.01442	0.20105	1.52879	0.0530266		CLDN9	8865	0.1926
RPS15A	14711	-0.1534		RPSA	-0.931613	-0.622444	-0.284451	1.617	0.221512		CLDN8	8866	0.1926
RPL15	14713	-0.1374		RPS2	-0.673583	-1.00739	-0.403276	1.3558	0.728447		PTPRF	8913	0.1898
RPL3	14739	-0.1227		RPL30	0.164071	-1.23976	-0.69857	0.454654	1.31961		MADCAM1	9029	0.1828
RPL10	14792	-0.1092		RPS27L	-0.707808	-0.649025	-0.811095	0.896951	1.27098		ITGB8	9508	0.1536
RSL24D1	14815	-0.0937									CDH4	9758	0.1383
RPL10A	14816	-0.0768									CDH3	9759	0.1383
RPL28	14818	-0.06									ITGB7	10253	0.1087
RPS11	14860	-0.0453									SELP	10879	0.0716
RPS26	14902	-0.0302									CDH15	10893	0.0719
RPLP0	14903	-0.0127									CD226	10971	0.0684
RPL23A	14918	0.0041									CD34	11165	0.058
RPSA	14936	0.0209									MPZ	11229	0.0557
RPS2	15046	0.0329									SELPLG	11236	0.0568
RPL30	15239	0.0421									GLG1	11385	0.0494
RPS27L	15891	0.0356									CLDN1	11434	0.0482
											VCAN	11523	0.0446
											SELE	11524	0.0464
											CLDN11	11561	0.0461
											CD8A	11771	0.0354
											ICAM1	11922	0.0286
											CD8B	11936	0.0301
											ITGA6	11994	0.029
											ICOS	12327	0.0115
											PTPRC	13125	-0.0333
											NCAM1	13595	-0.0574
											OCLN	13669	-0.0571
											PDCD1	13735	-0.0562
											PECAM1	14244	-0.0812
											CD22	14861	-0.1108
											NECTIN1	15415	-0.1337
											CDH2	15506	-0.1277
											CDH1	15606	-0.1215
											SELL	15661	-0.112
											ICOSLG	15767	-0.1045
											SDC2	15985	-0.1009
											NRXN1	15991	-0.0842
											CNTN2	15999	-0.0675
											PDCD1LG2	16173	-0.0577
											CLDN20	16254	-0.0397
											NECTIN3	16459	0.0009
