# Supplementary material for: Sepsis leads to lasting changes in phenotype and function of memory CD8 T cells
Source: eLife. 2021 Oct 15;10:e70989. doi: 10.7554/eLife.70989 (PMC8589447; doi:10.7554/eLife.70989)
Supplement: Figure 7—figure supplement 1—source data 1. [file elife-70989-fig7-figsupp1-data1.xlsx]

## Sheet: Figure 6-FS2-source data 1
aCD3 conc	Sham			CLP
0.01	24850	22637	22448	18852	17656	19196	17743
10	38476	34901	37088	35271	40201	35875	33497
0				16240	18021	17538	18148	17486.8	LOD
