# Supplementary material for: Sepsis leads to lasting changes in phenotype and function of memory CD8 T cells
Source: eLife. 2021 Oct 15;10:e70989. doi: 10.7554/eLife.70989 (PMC8589447; doi:10.7554/eLife.70989)
Supplement: Figure 7—figure supplement 1—source data 2. [file elife-70989-fig7-figsupp1-data2.xlsx]

## Sheet: Figure 6-FS2-source data 2
Control				Sepsis
Chamber	Image	AKT		Chamber	Image	AKT
1	1	6.667		1	1	9.176
		11.454				11.338
		8.2				13.898
		25.758			2	13.878
	2	35.53				28.534
		34.305				22.465
		17.846				13.201
		16.33			3	12.966
	3	15.117				18.651
		21.274				13.277
		13.139			4	17.904
		19.735				20.618
		9.734				15.373
		9.858				9.861
	4	22.029				7.2
		13.685			5	10.309
		20.807				12.903
		21.794				25.659
	5	17.828			6	22.23
		12.796				15.882
		14.834				14.043
		13.875			7	27.878
		14.487				13.561
	6	9.25				9.151
		16.219			8	11.607
		26.106				13.753
		17.773				16.263
		26.534				16.948
	7	11.603			9	19.812
		13.971				20.908
		35.974				5.075
		12.774				6.787
	8	29.395				10.278
		20.812			10	25.292
		17.323				12.91
		19.596				10.349
		13.037		2	1	16.987
	9	22.441				9.543
		21.002				7.138
		10.865			2	11.306
		12.047				13.836
	10	35.255				5.17
		24.729			3	10.268
		29.036				15.99
		16.048				10.726
		16.451				9.122
2	1	11.069			4	17.914
		15.831				14.313
		14.74				16.901
	2	17.128				11.653
		19.972				9.825
		22.142			5	15.056
		14.294				9.505
		15.661				13.923
	3	18.257				10.12
		18.59			6	12.523
		19.872				6.41
		12.322				28.005
	4	17.638			7	15.746
		9.45				13.601
		12.115				6.701
	5	11.001			8	18.192
		30.193				6.952
		22.021				7.397
		13.477				23.085
	6	23.368			9	11.89
		11.297				15.073
		15.754				8.329
	7	15.432				9.793
		16.507				9.921
		13.316			10	17.773
	8	20.117				18.477
		18.714				10.498
		15.783				17.584
		15.757				13.37
	9	12.035		3	1	13.128
		17.557				15.782
		18.047				19.552
	10	20.859				9.151
		16.015				10.121
		23.162			2	11.361
		26.762				9.792
		13.788				9.044
3	1	13.239				7.116
		12.601			3	8.583
		10.544				13.121
	2	14.022			4	22.292
		11.646				21.9
		12.563			5	12.825
		18.166				9.26
	3	14.014				19.204
		21.778				6.101
		22.572			6	17.091
		14.719				9.77
	4	9.264				10.935
		17.512				6.348
		18.419			7	20.264
		16.471				17.409
		15.358				16.707
	5	14.876			8	15.292
		19.525				23.232
		16.519				17.496
		10.565			9	13.361
	6	13.961				9.666
		14.467				19.358
		12.22			10	7.246
	7	12.91				26.231
		11.6				9.657
		8.764				6.213
	8	15.715
		12.75
		8.844
	9	13.304
		14.124
		21.762
		26.812
	10	27.853
		21.431
		14.071
		20.572
