# Supplementary material for: Sepsis leads to lasting changes in phenotype and function of memory CD8 T cells
Source: eLife. 2021 Oct 15;10:e70989. doi: 10.7554/eLife.70989 (PMC8589447; doi:10.7554/eLife.70989)
Supplement: Figure 7—figure supplement 2—source data 1. [file elife-70989-fig7-figsupp2-data1.xlsx]

## Sheet: Figure 7-FS2-source data 1
	% IFNg+ of Endo Ag-Exp CD8 T cells
	Sham					CLP
Media	0.178	0.386	0.536	0.247	0.137	0.105	0.432	0.475	0.443	0.08
GP33	12.13	10.93	12.64	13.32	11.62	12.6	13.84	12.23	11.2	11.31
	% IL-2+ of Endo Ag-Exp CD8 T cells
	Sham					CLP
Media	0.49	0.466	0.766	0.577	0.337	0.65	0.652	0.915	1.153	0.608
GP33	1.93	2.36	3.49	2.14	2.79	3.73	4.55	4.7	4.24	2.75
