# Supplementary material for: Sepsis leads to lasting changes in phenotype and function of memory CD8 T cells
Source: eLife. 2021 Oct 15;10:e70989. doi: 10.7554/eLife.70989 (PMC8589447; doi:10.7554/eLife.70989)
Supplement: Figure 7—source data 1. [file elife-70989-fig7-data1.xlsx]

## Sheet: Figure 7-source data 1
	% IFNg+ of P14 CD8 T cells
	Sham					CLP
Media	0.24	0	0.18	0	0.13	0.11	1.1	1.12	0	2.1
GP33	76	80.8	80.6	79.5	81.3	78.7	80.5	81.8	79	81
	% IL-2+ of P14 CD8 T cells
	Sham					CLP
Media	0	0.13	0.18	0	0.065	0.11	0.37	0	0.59	2.8
GP33	18.71	21.44	24.7	13.27	19.87	26.06	26.07	32.78	26.35	27.3
