# Supplementary material for: Sepsis leads to lasting changes in phenotype and function of memory CD8 T cells
Source: eLife. 2021 Oct 15;10:e70989. doi: 10.7554/eLife.70989 (PMC8589447; doi:10.7554/eLife.70989)
Supplement: Figure 7—source data 2. [file elife-70989-fig7-data2.xlsx]

## Sheet: Figure 6-source data 1
D5 Spleen Lm CFU				D5 Liver Lm CFU
	Naïve	Sham P14	CLP P14		Naïve	Sham P14	CLP P14
Exp 1	448333	6034.48	671875	Exp 1	4531250	0	417614
Exp 1	776786	6875	540625	Exp 1	3.55693e+06	0	46495.3
Exp 1		5568.18	159615	Exp 1		758.427	330000
Exp 1		61607.1		Exp 1		6586.54
Exp 2	5.74074e+06	11346.2	521429	Exp 2	5.71429e+06	8423.42	516304
Exp 2	3.7037e+06	12500	64285.7	Exp 2	1.46341e+06	6919.64	28467.2
Exp 2	1.39474e+07	5357.14	142308	Exp 2	5.31532e+06	4432.62	422131
Exp 2		7500	117308	Exp 2		5660.38	161290
Exp 2		7692.31	115909	Exp 2		3977.27	354545
