# Supplementary figures and images for: Sepsis leads to lasting changes in phenotype and function of memory CD8 T cells
Source: eLife journal article supplement (doi:10.7554/elife.70989), 2021-10-15

Figure 1-figure supplement 1

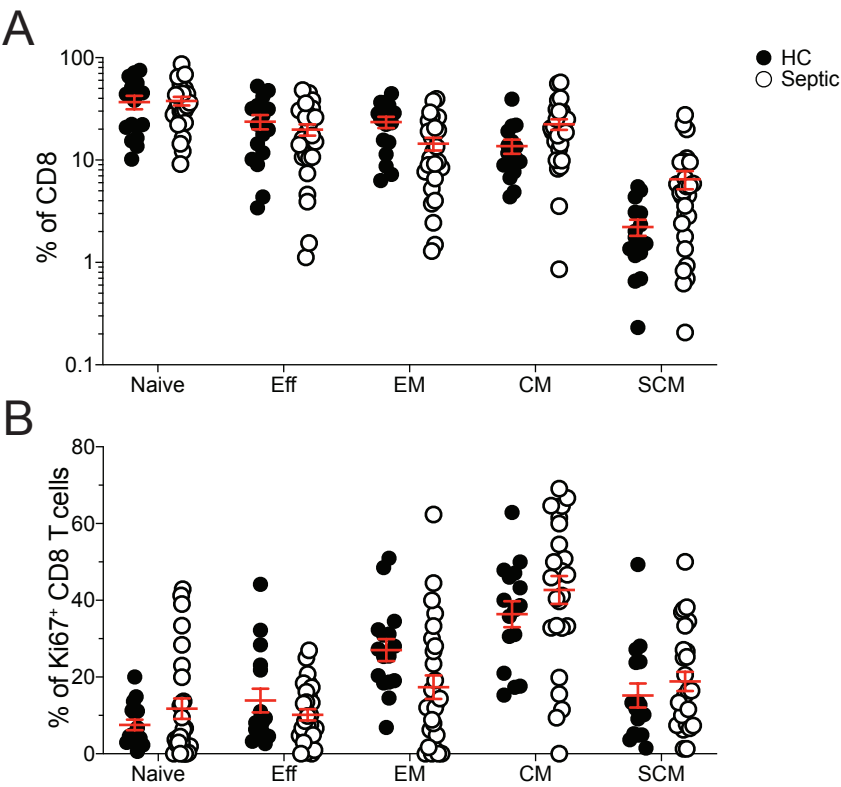

Supplement: supp [file elife-70989-supp-v1.zip]

Figure 7-figure supplement 2

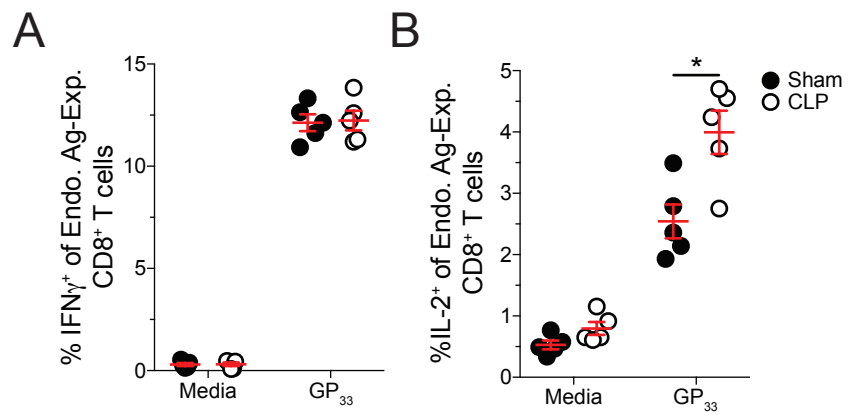

Supplement: supp [file elife-70989-supp-v1.zip]

Figure 7-figure supplement 1

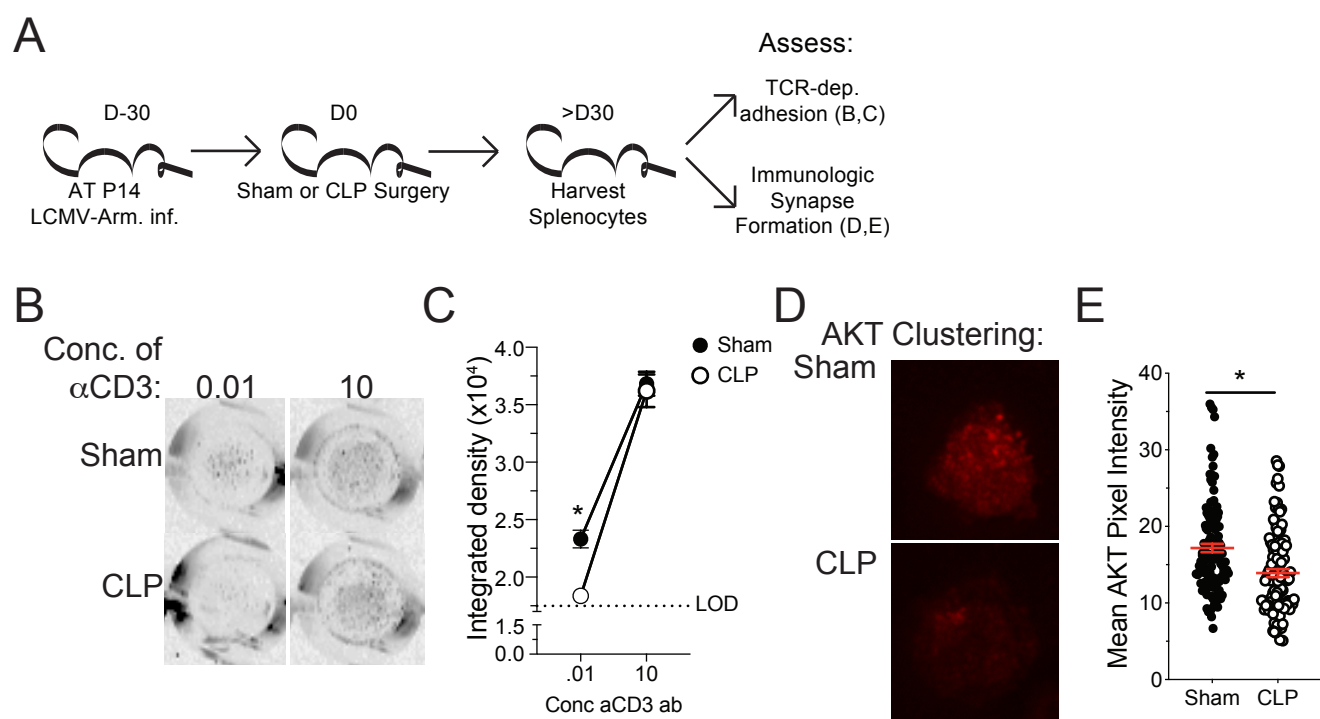

Supplement: supp [file elife-70989-supp-v1.zip]
